# Supplementary material for: Network Pharmacology and Molecular Docking Combined to Analyze the Molecular and Pharmacological Mechanism of Pinellia ternata in the Treatment of Hypertension
Source: Curr Issues Mol Biol. 2021 May 1;43(1):6. doi: 10.3390/cimb43010006 (PMC8929114; doi:10.3390/cimb43010006)
Supplement: Supplementary file 1 [file cimb-43-00006-s001.zip]

Archive with 12 entries (12 files):
- Supplementary Figure 1.pdf
- Supplementary Table 1.xls
- Supplementary Table 10.xls
- Supplementary Table 11.xls
- Supplementary Table 2.xls
- Supplementary Table 3.xls
- Supplementary Table 4.xls
- Supplementary Table 5.xls
- Supplementary Table 6.xls
- Supplementary Table 7.xls
- Supplementary Table 8.xls
- Supplementary Table 9.xls
