# Supplementary material for: Network Pharmacology and Molecular Docking Combined to Analyze the Molecular and Pharmacological Mechanism of Pinellia ternata in the Treatment of Hypertension
Source: Curr Issues Mol Biol. 2021 May 1;43(1):6. doi: 10.3390/cimb43010006 (PMC8929114; doi:10.3390/cimb43010006)
Supplement: Supplementary file 1 [file cimb-43-00006-s001.zip › Supplementary Figure 1.pdf]

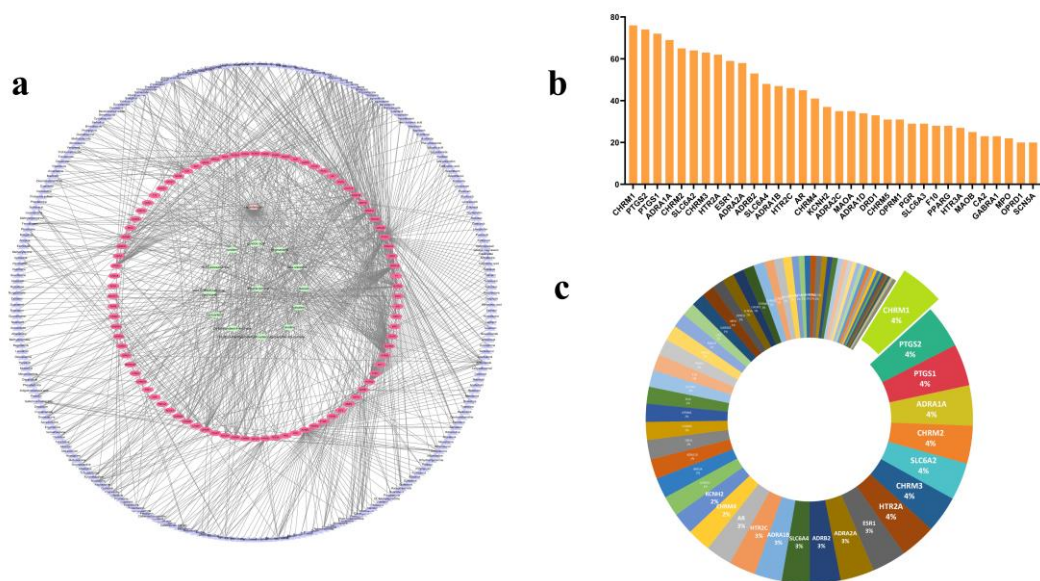

Supplementary Figure1. (a)Compound-target-drug network diagram the green part is the active ingredient of *P. ternata*, the red part is the target, and the purple part is the approved drug on the market at present. (b)A histogram of the types of drugs developed for the target on the market. (c)A percentage pie chart on the market for the types of drugs developed for the target.
