# Supplementary material for: Network Pharmacology and Molecular Docking Combined to Analyze the Molecular and Pharmacological Mechanism of Pinellia ternata in the Treatment of Hypertension
Source: Curr Issues Mol Biol. 2021 May 1;43(1):6. doi: 10.3390/cimb43010006 (PMC8929114; doi:10.3390/cimb43010006)
Supplement: Supplementary file 1 [file cimb-43-00006-s001.zip › Supplementary Table 1.xls]

## Sheet: Sheet1
Targets related to Pinellia ternata
Mol ID	Molecule name	Target name	Source	status
MOL000105	protocatechuic acid	Prostaglandin G/H synthase 1	DrugBank
MOL000105	protocatechuic acid	Arachidonate 5-lipoxygenase	DrugBank
MOL000105	protocatechuic acid	Prostaglandin G/H synthase 2	DrugBank
MOL000105	protocatechuic acid	Amine oxidase [flavin-containing] B	DrugBank
MOL000105	protocatechuic acid	Lysozyme	DrugBank
MOL000105	protocatechuic acid	Nicotinate-nucleotide--dimethylbenzimidazole phosphoribosyltransferase	DrugBank
MOL000105	protocatechuic acid	Alcohol dehydrogenase 1C	DrugBank
MOL000105	protocatechuic acid	Trypsin-3	DrugBank
MOL000105	protocatechuic acid	Protein kinase C alpha type	N/A	validated
MOL000105	protocatechuic acid	Protein kinase C beta type	N/A	validated
MOL000105	protocatechuic acid	Protein kinase C gamma type	N/A	validated
MOL000105	protocatechuic acid	Maltase-glucoamylase, intestinal	DrugBank	validated
MOL000105	protocatechuic acid	Protein kinase C zeta type	N/A	validated
MOL000114	vanillic acid	Prostaglandin G/H synthase 2	DrugBank
MOL000114	vanillic acid	Amine oxidase [flavin-containing] B	DrugBank
MOL000114	vanillic acid	Amine oxidase [flavin-containing] A	DrugBank
MOL000114	vanillic acid	Alpha-2A adrenergic receptor	DrugBank
MOL000114	vanillic acid	Prostaglandin G/H synthase 1	DrugBank
MOL000114	vanillic acid	Lysozyme	DrugBank
MOL000114	vanillic acid	Nitric oxide synthase, endothelial	N/A	validated
MOL000114	vanillic acid	5,6-dihydroxyindole-2-carboxylic acid oxidase	N/A	validated
MOL000131	EIC	Prostaglandin G/H synthase 1	DrugBank
MOL000131	EIC	Prostaglandin G/H synthase 2	DrugBank
MOL000131	EIC	Retinoic acid receptor RXR-alpha	DrugBank
MOL000131	EIC	Nuclear receptor coactivator 2	DrugBank
MOL000131	EIC	Lysozyme	DrugBank
MOL000131	EIC	Nicotinate-nucleotide--dimethylbenzimidazole phosphoribosyltransferase	DrugBank
MOL000131	EIC	Sodium-dependent noradrenaline transporter	DrugBank
MOL000131	EIC	Ig gamma-1 chain C region	DrugBank
MOL000131	EIC	Gamma-aminobutyric-acid receptor alpha-2 subunit	DrugBank
MOL000131	EIC	Gamma-aminobutyric acid receptor subunit alpha-1	DrugBank
MOL000131	EIC	Cytochrome P450-cam	DrugBank
MOL000131	EIC	Transient receptor potential cation channel subfamily V member 1	DrugBank
MOL000131	EIC	Muscarinic acetylcholine receptor M1	DrugBank
MOL000131	EIC	Muscarinic acetylcholine receptor M2	DrugBank
MOL000131	EIC	Gamma-aminobutyric-acid receptor subunit alpha-6	DrugBank
MOL001396	PENTADECYLIC ACID	Prostaglandin G/H synthase 1	DrugBank
MOL001396	PENTADECYLIC ACID	Rhodopsin	DrugBank
MOL001396	PENTADECYLIC ACID	Ig gamma-1 chain C region	DrugBank
MOL001396	PENTADECYLIC ACID	Ferrichrome-iron receptor	DrugBank
MOL001396	PENTADECYLIC ACID	Nuclear receptor coactivator 2	DrugBank
MOL001396	PENTADECYLIC ACID	Prostaglandin G/H synthase 2	DrugBank
MOL001452	protocatechualdehyde	Alcohol dehydrogenase 1C	DrugBank
MOL001452	protocatechualdehyde	Lysozyme	DrugBank
MOL001452	protocatechualdehyde	Nicotinate-nucleotide--dimethylbenzimidazole phosphoribosyltransferase
MOL001452	protocatechualdehyde	Muscarinic acetylcholine receptor M3	DrugBank
MOL001452	protocatechualdehyde	Muscarinic acetylcholine receptor M1	DrugBank
MOL001452	protocatechualdehyde	Gamma-aminobutyric-acid receptor alpha-2 subunit	DrugBank
MOL001452	protocatechualdehyde	Gamma-aminobutyric-acid receptor alpha-3 subunit	DrugBank
MOL001452	protocatechualdehyde	Muscarinic acetylcholine receptor M2	DrugBank
MOL001452	protocatechualdehyde	Gamma-aminobutyric acid receptor subunit alpha-1	DrugBank
MOL001452	protocatechualdehyde	Neuronal acetylcholine receptor protein, alpha-7 chain	DrugBank
MOL001452	protocatechualdehyde	Gamma-aminobutyric-acid receptor subunit alpha-6	DrugBank
MOL001452	protocatechualdehyde	Ornithine decarboxylase	DrugBank	validated
MOL000172	Furol	Alcohol dehydrogenase 1B	DrugBank
MOL000172	Furol	Alcohol dehydrogenase 1C	DrugBank
MOL000172	Furol	Alcohol dehydrogenase 1A	DrugBank
MOL000172	Furol	Lysozyme	DrugBank
MOL000172	Furol	Nicotinate-nucleotide--dimethylbenzimidazole phosphoribosyltransferase	DrugBank
MOL001729	Crysophanol	Prostaglandin G/H synthase 1	DrugBank
MOL001729	Crysophanol	Prostaglandin G/H synthase 2	DrugBank
MOL001729	Crysophanol	Heat shock protein HSP 90	DrugBank
MOL001729	Crysophanol	Nuclear receptor coactivator 2	DrugBank
MOL001729	Crysophanol	Calmodulin	DrugBank
MOL001729	Crysophanol	Sodium channel protein type 5 subunit alpha	DrugBank
MOL001729	Crysophanol	CGMP-inhibited 3',5'-cyclic phosphodiesterase A	DrugBank
MOL001729	Crysophanol	Gamma-aminobutyric acid receptor subunit alpha-1	DrugBank
MOL001729	Crysophanol	Phosphatidylinositol-4,5-bisphosphate 3-kinase catalytic subunit, gamma isoform	DrugBank
MOL001729	Crysophanol	mRNA of PKA Catalytic Subunit C-alpha	DrugBank
MOL001729	Crysophanol	Ig gamma-1 chain C region	DrugBank
MOL001729	Crysophanol	cAMP-dependent protein kinase inhibitor alpha	DrugBank
MOL001739	zoomaric acid	Prostaglandin G/H synthase 1	DrugBank
MOL001739	zoomaric acid	Prostaglandin G/H synthase 2	DrugBank
MOL001739	zoomaric acid	Nuclear receptor coactivator 2	DrugBank
MOL001744	uracil	4-aminobutyrate aminotransferase, mitochondrial	DrugBank
MOL001744	uracil	Gamma-aminobutyric acid receptor subunit alpha-1	DrugBank
MOL001744	uracil	Alcohol dehydrogenase 1B	DrugBank
MOL001744	uracil	Alcohol dehydrogenase 1C	DrugBank
MOL001744	uracil	Alcohol dehydrogenase 1A	DrugBank
MOL001744	uracil	Cytochrome P450-cam	DrugBank
MOL001744	uracil	Lysozyme	DrugBank
MOL001744	uracil	Bacillolysin	DrugBank
MOL001744	uracil	Nicotinate-nucleotide--dimethylbenzimidazole phosphoribosyltransferase	DrugBank
MOL001744	uracil	1-aminocyclopropane-1-carboxylate deaminase	DrugBank
MOL001744	uracil	Amine oxidase [flavin-containing] B	DrugBank
MOL001744	uracil	P-hydroxybenzoate hydroxylase	DrugBank
MOL001744	uracil	Y+L amino acid transporter 1	N/A	validated
MOL001755	24-Ethylcholest-4-en-3-one	Progesterone receptor	DrugBank
MOL001755	24-Ethylcholest-4-en-3-one	Mineralocorticoid receptor	DrugBank
MOL001757	GUN	Purine nucleoside phosphorylase	DrugBank
MOL001788	adenine	Purine nucleoside phosphorylase	DrugBank
MOL001788	adenine	Nicotinate-nucleotide--dimethylbenzimidazole phosphoribosyltransferase	DrugBank
MOL001788	adenine	Purine nucleoside phosphorylase deoD-type	DrugBank
MOL001788	adenine	Putative adenosylhomocysteinase 2	N/A	validated
MOL001818	Methyl palmitelaidate	Prostaglandin G/H synthase 1	DrugBank
MOL001818	Methyl palmitelaidate	Retinoic acid receptor RXR-alpha	DrugBank
MOL001818	Methyl palmitelaidate	Nuclear receptor coactivator 2	DrugBank
MOL001818	Methyl palmitelaidate	Prostaglandin G/H synthase 2	DrugBank
MOL001831	HX	Nicotinate-nucleotide--dimethylbenzimidazole phosphoribosyltransferase	DrugBank
MOL001831	HX	Purine nucleoside phosphorylase	DrugBank
MOL000223	caffeic acid	Prostaglandin G/H synthase 1	DrugBank	validated
MOL000223	caffeic acid	Beta-1 adrenergic receptor	DrugBank
MOL000223	caffeic acid	Prostaglandin G/H synthase 2	DrugBank	validated
MOL000223	caffeic acid	Alpha-2A adrenergic receptor	DrugBank
MOL000223	caffeic acid	Alpha-2C adrenergic receptor	DrugBank
MOL000223	caffeic acid	Beta-2 adrenergic receptor	DrugBank
MOL000223	caffeic acid	Amine oxidase [flavin-containing] B	DrugBank
MOL000223	caffeic acid	Chymotrypsinogen B	DrugBank
MOL000223	caffeic acid	Sodium-dependent dopamine transporter	DrugBank
MOL000223	caffeic acid	Aldose reductase	DrugBank
MOL000223	caffeic acid	Urokinase-type plasminogen activator	DrugBank
MOL000223	caffeic acid	Amine oxidase [flavin-containing] A	DrugBank
MOL000223	caffeic acid	Lysozyme	DrugBank
MOL000223	caffeic acid	Alpha-1A adrenergic receptor	DrugBank
MOL000223	caffeic acid	Alpha-1D adrenergic receptor	DrugBank
MOL000223	caffeic acid	Tumor necrosis factor	DrugBank	validated
MOL000223	caffeic acid	Cytochrome P450 1A1	N/A	validated
MOL000223	caffeic acid	Protein kinase C beta type	N/A	validated
MOL000223	caffeic acid	Tyrosine-protein kinase BTK	DrugBank	validated
MOL000223	caffeic acid	Glial fibrillary acidic protein	N/A	validated
MOL000223	caffeic acid	Insulin-like growth factor II	N/A	validated
MOL000223	caffeic acid	P-selectin	DrugBank	validated
MOL000223	caffeic acid	Ras-related C3 botulinum toxin substrate 1	DrugBank	validated
MOL002495	6-shogaol	Apoptosis regulator Bcl-2	DrugBank	validated
MOL002495	6-shogaol	Bcl-2-like protein 1	N/A	validated
MOL002495	6-shogaol	Apoptosis regulator BAX	N/A	validated
MOL002495	6-shogaol	Fatty acid synthase	DrugBank	validated
MOL002495	6-shogaol	Peroxisome proliferator-activated receptor gamma	N/A	validated
MOL002495	6-shogaol	Tumor necrosis factor ligand superfamily member 6	N/A	validated
MOL002495	6-shogaol	DNA damage-inducible transcript 3 protein	N/A	validated
MOL002670	Cavidine	Prostaglandin G/H synthase 1	DrugBank
MOL002670	Cavidine	Muscarinic acetylcholine receptor M3	DrugBank
MOL002670	Cavidine	Potassium voltage-gated channel subfamily H member 2	DrugBank
MOL002670	Cavidine	Muscarinic acetylcholine receptor M1	DrugBank
MOL002670	Cavidine	Beta-1 adrenergic receptor	DrugBank
MOL002670	Cavidine	Sodium channel protein type 5 subunit alpha	DrugBank
MOL002670	Cavidine	Coagulation factor Xa	DrugBank
MOL002670	Cavidine	Muscarinic acetylcholine receptor M5	DrugBank
MOL002670	Cavidine	Prostaglandin G/H synthase 2	DrugBank
MOL002670	Cavidine	5-hydroxytryptamine receptor 3A	DrugBank
MOL002670	Cavidine	Alpha-2C adrenergic receptor	DrugBank
MOL002670	Cavidine	Muscarinic acetylcholine receptor M4	DrugBank
MOL002670	Cavidine	Retinoic acid receptor RXR-alpha	DrugBank
MOL002670	Cavidine	Delta-type opioid receptor	DrugBank
MOL002670	Cavidine	5-hydroxytryptamine 2A receptor	DrugBank
MOL002670	Cavidine	5-hydroxytryptamine 2C receptor	DrugBank
MOL002670	Cavidine	Alpha-1B adrenergic receptor	DrugBank
MOL002670	Cavidine	Beta-2 adrenergic receptor	DrugBank
MOL002670	Cavidine	Alpha-1D adrenergic receptor	DrugBank
MOL002670	Cavidine	DNA topoisomerase II	DrugBank
MOL002670	Cavidine	Mu-type opioid receptor	DrugBank
MOL002670	Cavidine	Heat shock protein HSP 90	DrugBank
MOL002670	Cavidine	Retinoic acid receptor RXR-beta	DrugBank
MOL002670	Cavidine	Calmodulin	DrugBank
MOL002670	Cavidine	Dopamine D1 receptor	DrugBank
MOL002670	Cavidine	Sodium-dependent serotonin transporter	DrugBank
MOL002670	Cavidine	Coagulation factor VII	DrugBank
MOL002670	Cavidine	cAMP and cAMP-inhibited cGMP 3',5'-cyclic phosphodiesterase 10A	DrugBank
MOL002714	baicalein	Prostaglandin G/H synthase 1	DrugBank
MOL002714	baicalein	Androgen receptor	DrugBank
MOL002714	baicalein	Prostaglandin G/H synthase 2	DrugBank	validated
MOL002714	baicalein	Heat shock protein HSP 90	DrugBank
MOL002714	baicalein	mRNA of PKA Catalytic Subunit C-alpha	DrugBank
MOL002714	baicalein	Dipeptidyl peptidase IV	DrugBank
MOL002714	baicalein	Phosphatidylinositol-4,5-bisphosphate 3-kinase catalytic subunit, gamma isoform	DrugBank
MOL002714	baicalein	CGMP-inhibited 3',5'-cyclic phosphodiesterase A	DrugBank
MOL002714	baicalein	Trypsin-1	DrugBank
MOL002714	baicalein	Nuclear receptor coactivator 2	DrugBank
MOL002714	baicalein	Nuclear receptor coactivator 1	DrugBank
MOL002714	baicalein	Calmodulin	DrugBank
MOL002714	baicalein	Transcription factor p65	N/A	validated
MOL002714	baicalein	RAC-alpha serine/threonine-protein kinase	N/A	validated
MOL002714	baicalein	Vascular endothelial growth factor A	DrugBank	validated
MOL002714	baicalein	Apoptosis regulator Bcl-2	DrugBank	validated
MOL002714	baicalein	Proto-oncogene c-Fos	N/A	validated
MOL002714	baicalein	Apoptosis regulator BAX	N/A	validated
MOL002714	baicalein	Matrix metalloproteinase-9	N/A	validated
MOL002714	baicalein	Caspase-3	N/A	validated
MOL002714	baicalein	Cellular tumor antigen p53	DrugBank	validated
MOL002714	baicalein	Hypoxia-inducible factor 1-alpha	N/A	validated
MOL002714	baicalein	Fos-related antigen 1	N/A	validated
MOL002714	baicalein	Fos-related antigen 2	N/A	validated
MOL002714	baicalein	Cell division control protein 2 homolog	DrugBank	validated
MOL002714	baicalein	G2/mitotic-specific cyclin-B1	N/A	validated
MOL002714	baicalein	Myeloperoxidase	DrugBank	validated
MOL002714	baicalein	Aryl hydrocarbon receptor	DrugBank	validated
MOL002714	baicalein	Insulin-like growth factor II	N/A	validated
MOL002714	baicalein	Cytochrome c	DrugBank	validated
MOL002714	baicalein	Arachidonate 12-lipoxygenase, 12S-type	N/A	validated
MOL002714	baicalein	Nuclear factor of activated T-cells, cytoplasmic 1	N/A	validated
MOL002714	baicalein	Tudor domain-containing protein 7	N/A	validated
MOL002714	baicalein	Egl nine homolog 1	DrugBank	validated
MOL002714	baicalein	NADPH oxidase 5	N/A	validated
MOL002714	baicalein	Fatty acid-binding protein, epidermal	N/A	validated
MOL002714	baicalein	Apolipoprotein D	N/A	validated
MOL002776	Baicalin	Coagulation factor Xa	DrugBank
MOL002776	Baicalin	mRNA of Protein-tyrosine phosphatase, non-receptor type 1	DrugBank
MOL000346	succinic acid	4-aminobutyrate aminotransferase, mitochondrial	DrugBank
MOL000346	succinic acid	Aspartate aminotransferase, cytoplasmic	DrugBank
MOL000346	succinic acid	Branched chain amino acid-dependent aminotransferase	DrugBank
MOL000346	succinic acid	Aldose reductase	DrugBank
MOL000346	succinic acid	Proto-oncogene tyrosine-protein kinase SRC	DrugBank
MOL000346	succinic acid	Cathepsin D	DrugBank
MOL000346	succinic acid	M-phase inducer phosphatase 2	DrugBank
MOL000346	succinic acid	Cholinesterase	DrugBank
MOL000346	succinic acid	Alcohol dehydrogenase 1B	DrugBank
MOL000346	succinic acid	Alcohol dehydrogenase 1C	DrugBank
MOL000346	succinic acid	Alcohol dehydrogenase 1A	DrugBank
MOL000346	succinic acid	Cytochrome P450-cam	DrugBank
MOL000346	succinic acid	Aspartate aminotransferase	DrugBank
MOL000346	succinic acid	Ferrichrome-iron receptor	DrugBank
MOL000346	succinic acid	Monomeric sarcosine oxidase	DrugBank
MOL000346	succinic acid	Bacillolysin	DrugBank
MOL000346	succinic acid	Aromatic-amino-acid aminotransferase	DrugBank
MOL000346	succinic acid	1-aminocyclopropane-1-carboxylate deaminase	DrugBank
MOL000346	succinic acid	Growth-inhibiting protein 18	DrugBank
MOL000346	succinic acid	Aspartate aminotransferase, mitochondrial	DrugBank
MOL000346	succinic acid	S-adenosylmethionine synthetase isoform type-1	DrugBank
MOL000346	succinic acid	Triosephosphate isomerase	DrugBank
MOL000346	succinic acid	NAD-dependent malic enzyme, mitochondrial	DrugBank
MOL000346	succinic acid	NADP-dependent malic enzyme, mitochondrial	DrugBank
MOL000346	succinic acid	Trypsin-3	DrugBank
MOL000346	succinic acid	Nitric-oxide synthase, brain	DrugBank
MOL000346	succinic acid	Succinate semialdehyde dehydrogenase, mitochondrial	DrugBank
MOL000346	succinic acid	Ornithine aminotransferase, mitochondrial	DrugBank
MOL000346	succinic acid	Glycine receptor alpha-1 chain	DrugBank
MOL000346	succinic acid	mRNA of Protein-tyrosine phosphatase, non-receptor type 1	DrugBank
MOL000346	succinic acid	Gamma-aminobutyric acid receptor subunit alpha-1	DrugBank
MOL000346	succinic acid	Thioredoxin reductase, cytoplasmic	DrugBank
MOL000346	succinic acid	mRNA of PKA Catalytic Subunit C-alpha	DrugBank
MOL000346	succinic acid	Acetyl-CoA acetyltransferase	DrugBank
MOL000346	succinic acid	Formate acetyltransferase 1	DrugBank
MOL000346	succinic acid	Adenylosuccinate synthetase	DrugBank
MOL000346	succinic acid	Glucarate dehydratase	DrugBank
MOL000346	succinic acid	D-alanyl-D-alanine carboxypeptidase	DrugBank
MOL000346	succinic acid	Deacetoxycephalosporin C synthetase	DrugBank
MOL000346	succinic acid	Malate dehydrogenase	DrugBank
MOL000346	succinic acid	Fumarate reductase flavoprotein subunit	DrugBank
MOL000346	succinic acid	2-isopropylmalate synthase	DrugBank
MOL000346	succinic acid	Nicotinate-nucleotide--dimethylbenzimidazole phosphoribosyltransferase	DrugBank
MOL000346	succinic acid	Malonamidase E2	DrugBank
MOL000346	succinic acid	Glutamate dehydrogenase 1, mitochondrial	DrugBank
MOL000346	succinic acid	Ornithine carbamoyltransferase, mitochondrial	DrugBank
MOL000346	succinic acid	Pyruvate kinase isozymes M1/M2	DrugBank
MOL000346	succinic acid	Serine--pyruvate aminotransferase	DrugBank
MOL000346	succinic acid	Oxidoreductase	DrugBank
MOL000346	succinic acid	Succinate dehydrogenase [ubiquinone] flavoprotein subunit, mitochondrial	DrugBank
MOL000346	succinic acid	S-adenosylmethionine synthetase isoform type-2	DrugBank
MOL000346	succinic acid	Prolyl 3-hydroxylase 1	DrugBank
MOL000346	succinic acid	Prolyl 3-hydroxylase 3	DrugBank
MOL000346	succinic acid	Succinyl-CoA:3-ketoacid-coenzyme A transferase 2, mitochondrial	DrugBank
MOL000346	succinic acid	Mitochondrial dicarboxylate carrier	DrugBank
MOL000346	succinic acid	Prolyl 4-hydroxylase subunit alpha-2	DrugBank
MOL000346	succinic acid	Succinyl-CoA ligase [ADP-forming] beta-chain, mitochondrial	DrugBank
MOL000346	succinic acid	Haloalkane dehalogenase	DrugBank
MOL000346	succinic acid	Glucose--fructose oxidoreductase	DrugBank
MOL000346	succinic acid	Caspase-3	N/A	validated
MOL000357	Sitogluside	Progesterone receptor	DrugBank
MOL000357	Sitogluside	Prostaglandin G/H synthase 1	DrugBank
MOL000357	Sitogluside	Muscarinic acetylcholine receptor M3	DrugBank
MOL000357	Sitogluside	Potassium voltage-gated channel subfamily H member 2	DrugBank
MOL000357	Sitogluside	Muscarinic acetylcholine receptor M1	DrugBank
MOL000357	Sitogluside	Sodium channel protein type 5 subunit alpha	DrugBank
MOL000357	Sitogluside	Coagulation factor Xa	DrugBank
MOL000357	Sitogluside	Prostaglandin G/H synthase 2	DrugBank
MOL000357	Sitogluside	5-hydroxytryptamine receptor 3A	DrugBank
MOL000357	Sitogluside	Retinoic acid receptor RXR-alpha	DrugBank
MOL000357	Sitogluside	CGMP-inhibited 3',5'-cyclic phosphodiesterase A	DrugBank
MOL000357	Sitogluside	Alpha-1B adrenergic receptor	DrugBank
MOL000357	Sitogluside	Beta-2 adrenergic receptor	DrugBank
MOL000357	Sitogluside	Alpha-1D adrenergic receptor	DrugBank
MOL000357	Sitogluside	Heat shock protein HSP 90	DrugBank
MOL000357	Sitogluside	Nuclear receptor coactivator 2	DrugBank
MOL000357	Sitogluside	Calmodulin	DrugBank
MOL000358	beta-sitosterol	Progesterone receptor	DrugBank
MOL000358	beta-sitosterol	Nuclear receptor coactivator 2	DrugBank
MOL000358	beta-sitosterol	Prostaglandin G/H synthase 1	DrugBank
MOL000358	beta-sitosterol	Prostaglandin G/H synthase 2	DrugBank
MOL000358	beta-sitosterol	Heat shock protein HSP 90	DrugBank
MOL000358	beta-sitosterol	Phosphatidylinositol-4,5-bisphosphate 3-kinase catalytic subunit, gamma isoform	DrugBank
MOL000358	beta-sitosterol	Potassium voltage-gated channel subfamily H member 2	DrugBank
MOL000358	beta-sitosterol	mRNA of PKA Catalytic Subunit C-alpha	DrugBank
MOL000358	beta-sitosterol	Dopamine D1 receptor	DrugBank
MOL000358	beta-sitosterol	Muscarinic acetylcholine receptor M3	DrugBank
MOL000358	beta-sitosterol	Muscarinic acetylcholine receptor M1	DrugBank
MOL000358	beta-sitosterol	Sodium channel protein type 5 subunit alpha	DrugBank
MOL000358	beta-sitosterol	Gamma-aminobutyric-acid receptor alpha-2 subunit	DrugBank
MOL000358	beta-sitosterol	Muscarinic acetylcholine receptor M4	DrugBank
MOL000358	beta-sitosterol	CGMP-inhibited 3',5'-cyclic phosphodiesterase A	DrugBank
MOL000358	beta-sitosterol	5-hydroxytryptamine 2A receptor	DrugBank
MOL000358	beta-sitosterol	Gamma-aminobutyric-acid receptor alpha-5 subunit	DrugBank
MOL000358	beta-sitosterol	Alpha-1A adrenergic receptor	DrugBank
MOL000358	beta-sitosterol	Gamma-aminobutyric-acid receptor alpha-3 subunit	DrugBank
MOL000358	beta-sitosterol	Muscarinic acetylcholine receptor M2	DrugBank
MOL000358	beta-sitosterol	Alpha-1B adrenergic receptor	DrugBank
MOL000358	beta-sitosterol	Beta-2 adrenergic receptor	DrugBank
MOL000358	beta-sitosterol	Neuronal acetylcholine receptor subunit alpha-2	DrugBank
MOL000358	beta-sitosterol	Sodium-dependent serotonin transporter	DrugBank
MOL000358	beta-sitosterol	Mu-type opioid receptor	DrugBank
MOL000358	beta-sitosterol	Gamma-aminobutyric acid receptor subunit alpha-1	DrugBank
MOL000358	beta-sitosterol	Neuronal acetylcholine receptor protein, alpha-7 chain	DrugBank
MOL000358	beta-sitosterol	Cytochrome P450-cam	DrugBank
MOL000358	beta-sitosterol	Apoptosis regulator Bcl-2	DrugBank	validated
MOL000358	beta-sitosterol	Apoptosis regulator BAX	N/A	validated
MOL000358	beta-sitosterol	Caspase-9	N/A	validated
MOL000358	beta-sitosterol	Transcription factor AP-1	DrugBank	validated
MOL000358	beta-sitosterol	Caspase-3	N/A	validated
MOL000358	beta-sitosterol	Caspase-8	N/A	validated
MOL000358	beta-sitosterol	Protein kinase C alpha type	N/A	validated
MOL000358	beta-sitosterol	Transforming growth factor beta-1	N/A	validated
MOL000358	beta-sitosterol	Serum paraoxonase/arylesterase 1	DrugBank	validated
MOL000358	beta-sitosterol	Microtubule-associated protein 2	DrugBank	validated
MOL003870	gynesine	Prostaglandin G/H synthase 1	DrugBank
MOL003870	gynesine	Prostaglandin G/H synthase 2	DrugBank
MOL003870	gynesine	Retinoic acid receptor RXR-alpha	DrugBank
MOL003870	gynesine	Nuclear receptor coactivator 2	DrugBank
MOL003870	gynesine	Lysozyme	DrugBank
MOL003870	gynesine	Nicotinate-nucleotide--dimethylbenzimidazole phosphoribosyltransferase	DrugBank
MOL000388	gamma-aminobutyric acid	Cathepsin D	DrugBank
MOL000388	gamma-aminobutyric acid	Cholinesterase	DrugBank
MOL000388	gamma-aminobutyric acid	Alcohol dehydrogenase 1B	DrugBank
MOL000388	gamma-aminobutyric acid	Alcohol dehydrogenase 1C	DrugBank
MOL000388	gamma-aminobutyric acid	Cytochrome P450-cam	DrugBank
MOL000388	gamma-aminobutyric acid	Aspartate aminotransferase	DrugBank
MOL000388	gamma-aminobutyric acid	Ferrichrome-iron receptor	DrugBank
MOL000388	gamma-aminobutyric acid	Bacillolysin	DrugBank
MOL000388	gamma-aminobutyric acid	2-hydroxy-6-oxo-7-methylocta-2,4-dienoate hydrolase	DrugBank
MOL000388	gamma-aminobutyric acid	1-aminocyclopropane-1-carboxylate deaminase	DrugBank
MOL000388	gamma-aminobutyric acid	Glycine amidinotransferase, mitochondrial	DrugBank
MOL000388	gamma-aminobutyric acid	Trypsin-3	DrugBank
MOL000388	gamma-aminobutyric acid	4-aminobutyrate aminotransferase, mitochondrial	DrugBank
MOL000388	gamma-aminobutyric acid	mRNA of PKA Catalytic Subunit C-alpha	DrugBank
MOL000388	gamma-aminobutyric acid	Alcohol dehydrogenase 1A	DrugBank
MOL000388	gamma-aminobutyric acid	Haloalkane dehalogenase	DrugBank
MOL000388	gamma-aminobutyric acid	Interleukin-6	DrugBank	validated
MOL000388	gamma-aminobutyric acid	Transitional endoplasmic reticulum ATPase	N/A	validated
MOL000388	gamma-aminobutyric acid	Sodium- and chloride-dependent GABA transporter 1	DrugBank	validated
MOL000389	FERULIC ACID (CIS)	Prostaglandin G/H synthase 1	DrugBank
MOL000389	FERULIC ACID (CIS)	Prostaglandin G/H synthase 2	DrugBank
MOL000389	FERULIC ACID (CIS)	Nitric-oxide synthase, endothelial	DrugBank
MOL000389	FERULIC ACID (CIS)	Alpha-2A adrenergic receptor	DrugBank
MOL000389	FERULIC ACID (CIS)	Sodium-dependent noradrenaline transporter	DrugBank
MOL000389	FERULIC ACID (CIS)	Alpha-2B adrenergic receptor	DrugBank
MOL000389	FERULIC ACID (CIS)	Sodium-dependent dopamine transporter	DrugBank
MOL000389	FERULIC ACID (CIS)	Beta-2 adrenergic receptor	DrugBank
MOL000389	FERULIC ACID (CIS)	Leukotriene A-4 hydrolase	DrugBank
MOL000389	FERULIC ACID (CIS)	Amine oxidase [flavin-containing] B	DrugBank
MOL000389	FERULIC ACID (CIS)	Amine oxidase [flavin-containing] A	DrugBank
MOL000389	FERULIC ACID (CIS)	mRNA of PKA Catalytic Subunit C-alpha	DrugBank
MOL000389	FERULIC ACID (CIS)	Chymotrypsinogen B	DrugBank
MOL000389	FERULIC ACID (CIS)	Muscarinic acetylcholine receptor M2	DrugBank
MOL003969	L-Serin	Prostaglandin G/H synthase 1	DrugBank
MOL003969	L-Serin	S-adenosylmethionine decarboxylase proenzyme	DrugBank
MOL003969	L-Serin	4-aminobutyrate aminotransferase, mitochondrial	DrugBank
MOL003969	L-Serin	Glutamate [NMDA] receptor subunit zeta-1	DrugBank
MOL003969	L-Serin	Kynureninase	DrugBank
MOL003969	L-Serin	Glycine receptor alpha-1 chain	DrugBank
MOL003969	L-Serin	Aspartate aminotransferase, cytoplasmic	DrugBank
MOL003969	L-Serin	Proto-oncogene tyrosine-protein kinase SRC	DrugBank
MOL003969	L-Serin	Glycogen phosphorylase, muscle form	DrugBank
MOL003969	L-Serin	Cathepsin D	DrugBank
MOL003969	L-Serin	Cholinesterase	DrugBank
MOL003969	L-Serin	Xanthine dehydrogenase/oxidase	DrugBank
MOL003969	L-Serin	Alcohol dehydrogenase 1B	DrugBank
MOL003969	L-Serin	Alcohol dehydrogenase 1C	DrugBank
MOL003969	L-Serin	Cytochrome P450-cam	DrugBank
MOL003969	L-Serin	Aspartate aminotransferase	DrugBank
MOL003969	L-Serin	Ferrichrome-iron receptor	DrugBank
MOL003969	L-Serin	Histidinol dehydrogenase	DrugBank
MOL003969	L-Serin	Adenylosuccinate synthetase	DrugBank
MOL003969	L-Serin	Alanine racemase	DrugBank
MOL003969	L-Serin	Gag-Pol polyprotein	DrugBank
MOL003969	L-Serin	D-alanyl-D-alanine carboxypeptidase	DrugBank
MOL003969	L-Serin	Monomeric sarcosine oxidase	DrugBank
MOL003969	L-Serin	Bacillolysin	DrugBank
MOL003969	L-Serin	Dihydroxyacetone kinase	DrugBank
MOL003969	L-Serin	2-hydroxy-6-oxo-7-methylocta-2,4-dienoate hydrolase	DrugBank
MOL003969	L-Serin	1-aminocyclopropane-1-carboxylate deaminase	DrugBank
MOL003969	L-Serin	Methylmalonyl-CoA carboxyltransferase 5S subunit	DrugBank
MOL003969	L-Serin	Aspartate aminotransferase, mitochondrial	DrugBank
MOL003969	L-Serin	Serine--pyruvate aminotransferase	DrugBank
MOL003969	L-Serin	Cystathionine gamma-lyase	DrugBank
MOL003969	L-Serin	Seryl-tRNA synthetase, cytoplasmic	DrugBank
MOL003969	L-Serin	Glycine amidinotransferase, mitochondrial	DrugBank
MOL003969	L-Serin	Cysteine desulfurase, mitochondrial	DrugBank
MOL003969	L-Serin	Proton-coupled amino acid transporter 1	DrugBank
MOL003969	L-Serin	NAD-dependent malic enzyme, mitochondrial	DrugBank
MOL003969	L-Serin	NADP-dependent malic enzyme, mitochondrial	DrugBank
MOL003969	L-Serin	L-serine dehydratase	DrugBank
MOL003969	L-Serin	Trypsin-3	DrugBank
MOL003969	L-Serin	Aldose reductase	DrugBank
MOL003969	L-Serin	Gamma-aminobutyric acid receptor subunit alpha-1	DrugBank
MOL003969	L-Serin	Alcohol dehydrogenase 1A	DrugBank
MOL003969	L-Serin	Formate dehydrogenase H	DrugBank
MOL003969	L-Serin	Formate acetyltransferase 1	DrugBank
MOL003969	L-Serin	2-isopropylmalate synthase	DrugBank
MOL003969	L-Serin	Nicotinate-nucleotide--dimethylbenzimidazole phosphoribosyltransferase	DrugBank
MOL003969	L-Serin	Growth-inhibiting protein 18	DrugBank
MOL003969	L-Serin	Pyruvate kinase isozymes M1/M2	DrugBank
MOL003969	L-Serin	Alanine aminotransferase 1	DrugBank
MOL003969	L-Serin	Alanine--glyoxylate aminotransferase 2, mitochondrial	DrugBank
MOL003969	L-Serin	Ornithine aminotransferase, mitochondrial	DrugBank
MOL003969	L-Serin	Phosphonoacetaldehyde hydrolase	DrugBank
MOL003969	L-Serin	Beta-galactosidase	DrugBank
MOL003969	L-Serin	Glucose--fructose oxidoreductase	DrugBank
MOL003969	L-Serin	Phosphotriesterase	DrugBank
MOL003969	L-Serin	Malonamidase E2	DrugBank
MOL003969	L-Serin	Triosephosphate isomerase	DrugBank
MOL000397	cis-p-Coumarate	Prostaglandin G/H synthase 1	DrugBank
MOL000397	cis-p-Coumarate	Prostaglandin G/H synthase 2	DrugBank
MOL000397	cis-p-Coumarate	Amine oxidase [flavin-containing] B	DrugBank
MOL000397	cis-p-Coumarate	Amine oxidase [flavin-containing] A	DrugBank
MOL000397	cis-p-Coumarate	Thermolysin	DrugBank
MOL000397	cis-p-Coumarate	Chymotrypsinogen B	DrugBank
MOL000397	cis-p-Coumarate	Muscarinic acetylcholine receptor M3	DrugBank
MOL000397	cis-p-Coumarate	Muscarinic acetylcholine receptor M1	DrugBank
MOL000397	cis-p-Coumarate	Gamma-aminobutyric-acid receptor alpha-2 subunit	DrugBank
MOL000397	cis-p-Coumarate	Gamma-aminobutyric-acid receptor alpha-3 subunit	DrugBank
MOL000397	cis-p-Coumarate	Muscarinic acetylcholine receptor M2	DrugBank
MOL000397	cis-p-Coumarate	Gamma-aminobutyric acid receptor subunit alpha-1	DrugBank
MOL000397	cis-p-Coumarate	Neuronal acetylcholine receptor protein, alpha-7 chain	DrugBank
MOL000397	cis-p-Coumarate	Gamma-aminobutyric-acid receptor subunit alpha-6	DrugBank
MOL003971	Threonin	Prostaglandin G/H synthase 1	DrugBank
MOL003971	Threonin	Nitric-oxide synthase, brain	DrugBank
MOL003971	Threonin	4-aminobutyrate aminotransferase, mitochondrial	DrugBank
MOL003971	Threonin	Glycine receptor alpha-1 chain	DrugBank
MOL003971	Threonin	Aspartate aminotransferase, cytoplasmic	DrugBank
MOL003971	Threonin	mRNA of Protein-tyrosine phosphatase, non-receptor type 1	DrugBank
MOL003971	Threonin	Branched chain amino acid-dependent aminotransferase	DrugBank
MOL003971	Threonin	Aldose reductase	DrugBank
MOL003971	Threonin	Gamma-aminobutyric acid receptor subunit alpha-1	DrugBank
MOL003971	Threonin	Proto-oncogene tyrosine-protein kinase SRC	DrugBank
MOL003971	Threonin	Cathepsin D	DrugBank
MOL003971	Threonin	Cholinesterase	DrugBank
MOL003971	Threonin	Alcohol dehydrogenase 1B	DrugBank
MOL003971	Threonin	Alcohol dehydrogenase 1C	DrugBank
MOL003971	Threonin	Cytochrome P450-cam	DrugBank
MOL003971	Threonin	Aspartate aminotransferase	DrugBank
MOL003971	Threonin	Ferrichrome-iron receptor	DrugBank
MOL003971	Threonin	Adenylosuccinate synthetase	DrugBank
MOL003971	Threonin	D-alanyl-D-alanine carboxypeptidase	DrugBank
MOL003971	Threonin	Bacillolysin	DrugBank
MOL003971	Threonin	1-aminocyclopropane-1-carboxylate deaminase	DrugBank
MOL003971	Threonin	Growth-inhibiting protein 18	DrugBank
MOL003971	Threonin	Aspartate aminotransferase, mitochondrial	DrugBank
MOL003971	Threonin	Serine--pyruvate aminotransferase	DrugBank
MOL003971	Threonin	Cystathionine gamma-lyase	DrugBank
MOL003971	Threonin	Glycine amidinotransferase, mitochondrial	DrugBank
MOL003971	Threonin	NAD-dependent malic enzyme, mitochondrial	DrugBank
MOL003971	Threonin	Threonyl-tRNA synthetase, cytoplasmic	DrugBank
MOL003971	Threonin	Glutamate [NMDA] receptor subunit zeta-1	DrugBank
MOL003971	Threonin	Prostaglandin G/H synthase 2	DrugBank
MOL003971	Threonin	Beta-galactosidase	DrugBank
MOL003971	Threonin	Formate acetyltransferase 1	DrugBank
MOL000432	linolenic acid	Prostaglandin G/H synthase 1	DrugBank
MOL000432	linolenic acid	Prostaglandin G/H synthase 2	DrugBank
MOL000432	linolenic acid	Retinoic acid receptor RXR-alpha	DrugBank
MOL000432	linolenic acid	Nuclear receptor coactivator 2	DrugBank
MOL000432	linolenic acid	Retinoic acid receptor RXR-gamma	DrugBank
MOL000432	linolenic acid	Transient receptor potential cation channel subfamily V member 1	DrugBank
MOL000432	linolenic acid	Transcription factor p65	N/A	validated
MOL000432	linolenic acid	Proliferating cell nuclear antigen	N/A	validated
MOL000432	linolenic acid	Serum albumin	N/A	validated
MOL000432	linolenic acid	Myc proto-oncogene protein	N/A	validated
MOL000432	linolenic acid	Calmodulin	DrugBank	validated
MOL000432	linolenic acid	Hepatocyte nuclear factor 4-alpha	DrugBank	validated
MOL000432	linolenic acid	Mitochondrial uncoupling protein 2	N/A	validated
MOL000432	linolenic acid	Hepatocyte nuclear factor 1-alpha	N/A	validated
MOL000432	linolenic acid	Actin, cytoplasmic 1	N/A	validated
MOL000432	linolenic acid	Tripartite motif-containing protein 26	N/A	validated
MOL000449	Stigmasterol	Progesterone receptor	DrugBank
MOL000449	Stigmasterol	Mineralocorticoid receptor	DrugBank
MOL000449	Stigmasterol	Nuclear receptor coactivator 2	DrugBank
MOL000449	Stigmasterol	Alcohol dehydrogenase 1C	DrugBank
MOL000449	Stigmasterol	Ig gamma-1 chain C region	DrugBank
MOL000449	Stigmasterol	Retinoic acid receptor RXR-alpha	DrugBank
MOL000449	Stigmasterol	Nuclear receptor coactivator 1	DrugBank
MOL000449	Stigmasterol	Prostaglandin G/H synthase 1	DrugBank
MOL000449	Stigmasterol	Prostaglandin G/H synthase 2	DrugBank
MOL000449	Stigmasterol	Alpha-2A adrenergic receptor	DrugBank
MOL000449	Stigmasterol	Sodium-dependent noradrenaline transporter	DrugBank
MOL000449	Stigmasterol	Sodium-dependent dopamine transporter	DrugBank
MOL000449	Stigmasterol	Beta-2 adrenergic receptor	DrugBank
MOL000449	Stigmasterol	Aldose reductase	DrugBank
MOL000449	Stigmasterol	Urokinase-type plasminogen activator	DrugBank
MOL000449	Stigmasterol	Leukotriene A-4 hydrolase	DrugBank
MOL000449	Stigmasterol	Amine oxidase [flavin-containing] B	DrugBank
MOL000449	Stigmasterol	Amine oxidase [flavin-containing] A	DrugBank
MOL000449	Stigmasterol	mRNA of PKA Catalytic Subunit C-alpha	DrugBank
MOL000449	Stigmasterol	Chymotrypsinogen B	DrugBank
MOL000449	Stigmasterol	Muscarinic acetylcholine receptor M3	DrugBank
MOL000449	Stigmasterol	Muscarinic acetylcholine receptor M1	DrugBank
MOL000449	Stigmasterol	Beta-1 adrenergic receptor	DrugBank
MOL000449	Stigmasterol	Sodium channel protein type 5 subunit alpha	DrugBank
MOL000449	Stigmasterol	5-hydroxytryptamine 2A receptor	DrugBank
MOL000449	Stigmasterol	Alpha-1A adrenergic receptor	DrugBank
MOL000449	Stigmasterol	Gamma-aminobutyric-acid receptor alpha-3 subunit	DrugBank
MOL000449	Stigmasterol	Muscarinic acetylcholine receptor M2	DrugBank
MOL000449	Stigmasterol	Alpha-1B adrenergic receptor	DrugBank
MOL000449	Stigmasterol	Gamma-aminobutyric acid receptor subunit alpha-1	DrugBank
MOL000449	Stigmasterol	Neuronal acetylcholine receptor protein, alpha-7 chain	DrugBank
MOL000458	campesterol	Progesterone receptor	DrugBank
MOL004739	DAL	Prostaglandin G/H synthase 1	DrugBank
MOL004739	DAL	S-adenosylmethionine decarboxylase proenzyme	DrugBank
MOL004739	DAL	Succinate semialdehyde dehydrogenase, mitochondrial	DrugBank
MOL004739	DAL	4-aminobutyrate aminotransferase, mitochondrial	DrugBank
MOL004739	DAL	DNA polymerase (HSV)	DrugBank
MOL004739	DAL	Glutamate [NMDA] receptor subunit zeta-1	DrugBank
MOL004739	DAL	Kynureninase	DrugBank
MOL004739	DAL	Glycine receptor alpha-1 chain	DrugBank
MOL004739	DAL	Aspartate aminotransferase, cytoplasmic	DrugBank
MOL004739	DAL	Gamma-aminobutyric acid receptor subunit alpha-1	DrugBank
MOL004739	DAL	Proto-oncogene tyrosine-protein kinase SRC	DrugBank
MOL004739	DAL	Glycogen phosphorylase, muscle form	DrugBank
MOL004739	DAL	Cathepsin D	DrugBank
MOL004739	DAL	Neutrophil collagenase	DrugBank
MOL004739	DAL	Macrophage metalloelastase	DrugBank
MOL004739	DAL	UDP-glucose 4-epimerase	DrugBank
MOL004739	DAL	Cholinesterase	DrugBank
MOL004739	DAL	Xanthine dehydrogenase/oxidase	DrugBank
MOL004739	DAL	Elastase 1	DrugBank
MOL004739	DAL	Alcohol dehydrogenase 1B	DrugBank
MOL004739	DAL	Alcohol dehydrogenase 1C	DrugBank
MOL004739	DAL	Alcohol dehydrogenase 1A	DrugBank
MOL004739	DAL	Arginase-1	DrugBank
MOL004739	DAL	Catalase	DrugBank
MOL004739	DAL	Ribonucleoside-diphosphate reductase large subunit	DrugBank
MOL004739	DAL	Pyruvate kinase isozymes R/L	DrugBank
MOL004739	DAL	Phosphonoacetaldehyde hydrolase	DrugBank
MOL004739	DAL	Cytochrome P450-cam	DrugBank
MOL004739	DAL	Aspartate aminotransferase	DrugBank
MOL004739	DAL	Beta-galactosidase	DrugBank
MOL004739	DAL	Ferrichrome-iron receptor	DrugBank
MOL004739	DAL	Histidinol dehydrogenase	DrugBank
MOL004739	DAL	Formate acetyltransferase 1	DrugBank
MOL004739	DAL	Adenylosuccinate synthetase	DrugBank
MOL004739	DAL	Alanine racemase	DrugBank
MOL004739	DAL	Gag-Pol polyprotein	DrugBank
MOL004739	DAL	D-alanyl-D-alanine carboxypeptidase	DrugBank
MOL004739	DAL	Monomeric sarcosine oxidase	DrugBank
MOL004739	DAL	Bacillolysin	DrugBank
MOL004739	DAL	Dihydroxyacetone kinase	DrugBank
MOL004739	DAL	Haloalkane dehalogenase	DrugBank
MOL004739	DAL	2-isopropylmalate synthase	DrugBank
MOL004739	DAL	2-hydroxy-6-oxo-7-methylocta-2,4-dienoate hydrolase	DrugBank
MOL004739	DAL	1-aminocyclopropane-1-carboxylate deaminase	DrugBank
MOL004739	DAL	Nicotinate-nucleotide--dimethylbenzimidazole phosphoribosyltransferase	DrugBank
MOL004739	DAL	Growth-inhibiting protein 18	DrugBank
MOL004739	DAL	Methylmalonyl-CoA carboxyltransferase 5S subunit	DrugBank
MOL004739	DAL	Coagulation factor XIII A chain	DrugBank
MOL004739	DAL	Aspartate aminotransferase, mitochondrial	DrugBank
MOL004739	DAL	Pyruvate kinase isozymes M1/M2	DrugBank
MOL004739	DAL	Serine--pyruvate aminotransferase	DrugBank
MOL004739	DAL	Alanine aminotransferase 1	DrugBank
MOL004739	DAL	Cystathionine gamma-lyase	DrugBank
MOL004739	DAL	Alanine--glyoxylate aminotransferase 2, mitochondrial	DrugBank
MOL004739	DAL	NADP-dependent malic enzyme	DrugBank
MOL004739	DAL	Alanyl-tRNA synthetase, cytoplasmic	DrugBank
MOL004739	DAL	Glycine amidinotransferase, mitochondrial	DrugBank
MOL004739	DAL	Cysteine desulfurase, mitochondrial	DrugBank
MOL004739	DAL	Alanine--glyoxylate aminotransferase 2-like 2	DrugBank
MOL004739	DAL	Proton-coupled amino acid transporter 1	DrugBank
MOL004739	DAL	L-lactate dehydrogenase A chain	DrugBank
MOL004739	DAL	2-amino-3-ketobutyrate coenzyme A ligase, mitochondrial	DrugBank
MOL004739	DAL	Triosephosphate isomerase	DrugBank
MOL004739	DAL	NAD-dependent malic enzyme, mitochondrial	DrugBank
MOL004739	DAL	SHMT2 protein	DrugBank
MOL004739	DAL	NADP-dependent malic enzyme, mitochondrial	DrugBank
MOL004739	DAL	L-lactate dehydrogenase B chain	DrugBank
MOL004739	DAL	Trypsin-3	DrugBank
MOL004739	DAL	Ornithine aminotransferase, mitochondrial	DrugBank
MOL004739	DAL	M-phase inducer phosphatase 2	DrugBank
MOL004739	DAL	Phosphotriesterase	DrugBank
MOL004739	DAL	Nitric-oxide synthase, brain	DrugBank
MOL000475	anethole	Alpha-2C adrenergic receptor	DrugBank
MOL000475	anethole	Sodium-dependent noradrenaline transporter	DrugBank
MOL000475	anethole	Alpha-1A adrenergic receptor	DrugBank
MOL000475	anethole	Sodium-dependent dopamine transporter	DrugBank
MOL000475	anethole	Beta-2 adrenergic receptor	DrugBank
MOL000475	anethole	Amine oxidase [flavin-containing] B	DrugBank
MOL000475	anethole	Amine oxidase [flavin-containing] A	DrugBank
MOL000475	anethole	Lysozyme	DrugBank
MOL000475	anethole	Renin, renal	DrugBank
MOL000475	anethole	Trypsin-3	DrugBank
MOL000475	anethole	Muscarinic acetylcholine receptor M1	DrugBank
MOL000475	anethole	Transcription factor p65	N/A	validated
MOL000475	anethole	Transcription factor AP-1	DrugBank	validated
MOL000475	anethole	NF-kappa-B inhibitor alpha	N/A	validated
MOL000475	anethole	Interleukin-2	DrugBank	validated
MOL000050	GLY	Prostaglandin G/H synthase 1	DrugBank
MOL000050	GLY	Nitric-oxide synthase, brain	DrugBank
MOL000050	GLY	Aldehyde dehydrogenase, mitochondrial	DrugBank
MOL000050	GLY	Succinate semialdehyde dehydrogenase, mitochondrial	DrugBank
MOL000050	GLY	4-aminobutyrate aminotransferase, mitochondrial	DrugBank
MOL000050	GLY	Prostaglandin G/H synthase 2	DrugBank
MOL000050	GLY	Renin, renal	DrugBank
MOL000050	GLY	Serine hydroxymethyltransferase, mitochondrial	DrugBank
MOL000050	GLY	DNA polymerase (HSV)	DrugBank
MOL000050	GLY	Coagulation factor VII	DrugBank
MOL000050	GLY	Glutamate [NMDA] receptor subunit zeta-1	DrugBank
MOL000050	GLY	Kynureninase	DrugBank
MOL000050	GLY	Glutamate [NMDA] receptor subunit epsilon 2	DrugBank
MOL000050	GLY	Ornithine aminotransferase, mitochondrial	DrugBank
MOL000050	GLY	Glycine receptor alpha-1 chain	DrugBank
MOL000050	GLY	Aspartate aminotransferase, cytoplasmic	DrugBank
MOL000050	GLY	Aldose reductase	DrugBank
MOL000050	GLY	Glutamate [NMDA] receptor subunit epsilon 1	DrugBank
MOL000050	GLY	Gamma-aminobutyric acid receptor subunit alpha-1	DrugBank
MOL000050	GLY	Proto-oncogene tyrosine-protein kinase SRC	DrugBank
MOL000050	GLY	Glycogen phosphorylase, muscle form	DrugBank
MOL000050	GLY	Sodium- and chloride-dependent glycine transporter 1	DrugBank
MOL000050	GLY	Cathepsin D	DrugBank
MOL000050	GLY	Beta-catenin	DrugBank
MOL000050	GLY	Lactotransferrin	DrugBank
MOL000050	GLY	Inhibitor of nuclear factor kappa B kinase beta subunit	DrugBank
MOL000050	GLY	Neutrophil collagenase	DrugBank
MOL000050	GLY	Macrophage metalloelastase	DrugBank
MOL000050	GLY	Leukotriene A-4 hydrolase	DrugBank
MOL000050	GLY	M-phase inducer phosphatase 2	DrugBank
MOL000050	GLY	Thioredoxin reductase, cytoplasmic	DrugBank
MOL000050	GLY	Cholinesterase	DrugBank
MOL000050	GLY	Amine oxidase [flavin-containing] B	DrugBank
MOL000050	GLY	Xanthine dehydrogenase/oxidase	DrugBank
MOL000050	GLY	Pancreatic alpha-amylase	DrugBank
MOL000050	GLY	Elastase 1	DrugBank
MOL000050	GLY	Phospholipase A2	DrugBank
MOL000050	GLY	Alcohol dehydrogenase 1B	DrugBank
MOL000050	GLY	Alcohol dehydrogenase 1C	DrugBank
MOL000050	GLY	Alcohol dehydrogenase 1A	DrugBank
MOL000050	GLY	Arginase-1	DrugBank
MOL000050	GLY	Catalase	DrugBank
MOL000050	GLY	Glycine dehydrogenase [decarboxylating], mitochondrial	DrugBank
MOL000050	GLY	Ribonucleoside-diphosphate reductase large subunit	DrugBank
MOL000050	GLY	Pyruvate kinase isozymes R/L	DrugBank
MOL000050	GLY	Dihydroorotate dehydrogenase, mitochondrial	DrugBank
MOL000050	GLY	Sigma factor sigB regulation protein rsbQ	DrugBank
MOL000050	GLY	Phosphoribosylformylglycinamidine synthase	DrugBank
MOL000050	GLY	Phosphonoacetaldehyde hydrolase	DrugBank
MOL000050	GLY	Glycine oxidase	DrugBank
MOL000050	GLY	Cytochrome P450-cam	DrugBank
MOL000050	GLY	Aspartate aminotransferase	DrugBank
MOL000050	GLY	Beta-galactosidase	DrugBank
MOL000050	GLY	Methionyl-tRNA synthetase	DrugBank
MOL000050	GLY	Ferrichrome-iron receptor	DrugBank
MOL000050	GLY	Histidinol dehydrogenase	DrugBank
MOL000050	GLY	Pyruvate dehydrogenase [cytochrome]	DrugBank
MOL000050	GLY	Acetyl-CoA acetyltransferase	DrugBank
MOL000050	GLY	Formate dehydrogenase H	DrugBank
MOL000050	GLY	Formate acetyltransferase 1	DrugBank
MOL000050	GLY	Adenylosuccinate synthetase	DrugBank
MOL000050	GLY	Beta-lactamase SHV-2 precursor	DrugBank
MOL000050	GLY	Succinate dehydrogenase flavoprotein subunit	DrugBank
MOL000050	GLY	Beta-lactamase SHV-1 precursor	DrugBank
MOL000050	GLY	Beta-lactamase SHV-1	DrugBank
MOL000050	GLY	Alanine racemase	DrugBank
MOL000050	GLY	Gag-Pol polyprotein	DrugBank
MOL000050	GLY	Methionine synthase	DrugBank
MOL000050	GLY	D-alanyl-D-alanine carboxypeptidase	DrugBank
MOL000050	GLY	Sensor protein fixL	DrugBank
MOL000050	GLY	Siroheme synthase	DrugBank
MOL000050	GLY	Acetolactate synthase, catabolic	DrugBank
MOL000050	GLY	Beta-amylase	DrugBank
MOL000050	GLY	Alpha-ketoglutarate-dependent taurine dioxygenase	DrugBank
MOL000050	GLY	Endoglucanase G	DrugBank
MOL000050	GLY	Monomeric sarcosine oxidase	DrugBank
MOL000050	GLY	Bacillolysin	DrugBank
MOL000050	GLY	Dihydroxyacetone kinase	DrugBank
MOL000050	GLY	Biphenyl-2,3-diol 1,2-dioxygenase	DrugBank
MOL000050	GLY	Arylsulfatase	DrugBank
MOL000050	GLY	Haloalkane dehalogenase	DrugBank
MOL000050	GLY	Probable pyruvate-flavodoxin oxidoreductase	DrugBank
MOL000050	GLY	Ferredoxin-dependent glutamate synthase 2	DrugBank
MOL000050	GLY	2-isopropylmalate synthase	DrugBank
MOL000050	GLY	2-hydroxy-6-oxo-7-methylocta-2,4-dienoate hydrolase	DrugBank
MOL000050	GLY	1-aminocyclopropane-1-carboxylate deaminase	DrugBank
MOL000050	GLY	Hydroxylamine reductase	DrugBank
MOL000050	GLY	Clavaminate synthase 1	DrugBank
MOL000050	GLY	Nicotinate-nucleotide--dimethylbenzimidazole phosphoribosyltransferase	DrugBank
MOL000050	GLY	Glucose--fructose oxidoreductase	DrugBank
MOL000050	GLY	Peroxidase/catalase T	DrugBank
MOL000050	GLY	Growth-inhibiting protein 18	DrugBank
MOL000050	GLY	Serine hydroxymethyltransferase 2	DrugBank
MOL000050	GLY	Serine hydroxymethyltransferase 1	DrugBank
MOL000050	GLY	Methylmalonyl-CoA carboxyltransferase 5S subunit	DrugBank
MOL000050	GLY	4-chlorobenzoyl CoA ligase	DrugBank
MOL000050	GLY	Phosphotriesterase	DrugBank
MOL000050	GLY	Oligopeptide ABC transporter, periplasmic oligopeptide-binding protein	DrugBank
MOL000050	GLY	Glutamate dehydrogenase 1, mitochondrial	DrugBank
MOL000050	GLY	Coagulation factor XIII A chain	DrugBank
MOL000050	GLY	Aspartate aminotransferase, mitochondrial	DrugBank
MOL000050	GLY	Glycogen phosphorylase, liver form	DrugBank
MOL000050	GLY	Asparagine synthetase [glutamine-hydrolyzing]	DrugBank
MOL000050	GLY	Pyruvate kinase isozymes M1/M2	DrugBank
MOL000050	GLY	Serine--pyruvate aminotransferase	DrugBank
MOL000050	GLY	Carnitine O-palmitoyltransferase 2, mitochondrial	DrugBank
MOL000050	GLY	Alanine aminotransferase 1	DrugBank
MOL000050	GLY	Cystathionine gamma-lyase	DrugBank
MOL000050	GLY	Serine hydroxymethyltransferase, cytosolic	DrugBank
MOL000050	GLY	Glycyl-tRNA synthetase	DrugBank
MOL000050	GLY	Glycine N-methyltransferase	DrugBank
MOL000050	GLY	Probable alanyl-tRNA synthetase, mitochondrial	DrugBank
MOL000050	GLY	Glycine N-acyltransferase	DrugBank
MOL000050	GLY	N-acetylglutamate synthase, mitochondrial	DrugBank
MOL000050	GLY	Glutamate [NMDA] receptor subunit 3A	DrugBank
MOL000050	GLY	Alanine aminotransferase 2	DrugBank
MOL000050	GLY	Glycine N-acyltransferase-like protein 1	DrugBank
MOL000050	GLY	Alanine--glyoxylate aminotransferase 2, mitochondrial	DrugBank
MOL000050	GLY	Gephyrin	DrugBank
MOL000050	GLY	Group IIE secretory phospholipase A2	DrugBank
MOL000050	GLY	Peroxisomal sarcosine oxidase	DrugBank
MOL000050	GLY	Mitochondrial dicarboxylate carrier	DrugBank
MOL000050	GLY	Tyrosyl-tRNA synthetase, mitochondrial	DrugBank
MOL000050	GLY	NADP-dependent malic enzyme	DrugBank
MOL000050	GLY	Glutamate dehydrogenase 2, mitochondrial	DrugBank
MOL000050	GLY	Alanyl-tRNA synthetase, cytoplasmic	DrugBank
MOL000050	GLY	Glycine amidinotransferase, mitochondrial	DrugBank
MOL000050	GLY	Calcium-transporting ATPase type 2C member 1	DrugBank
MOL000050	GLY	Cysteine desulfurase, mitochondrial	DrugBank
MOL000050	GLY	Alanine--glyoxylate aminotransferase 2-like 2	DrugBank
MOL000050	GLY	Proton-coupled amino acid transporter 1	DrugBank
MOL000050	GLY	Adenylosuccinate synthetase isozyme 1	DrugBank
MOL000050	GLY	L-lactate dehydrogenase A chain	DrugBank
MOL000050	GLY	Glycine receptor subunit alpha-2	DrugBank
MOL000050	GLY	2-amino-3-ketobutyrate coenzyme A ligase, mitochondrial	DrugBank
MOL000050	GLY	Glutamate [NMDA] receptor subunit epsilon-3	DrugBank
MOL000050	GLY	Pyruvate dehydrogenase E1 component subunit beta, mitochondrial	DrugBank
MOL000050	GLY	Triosephosphate isomerase	DrugBank
MOL000050	GLY	NAD-dependent malic enzyme, mitochondrial	DrugBank
MOL000050	GLY	5-aminolevulinate synthase, erythroid-specific, mitochondrial	DrugBank
MOL000050	GLY	Glycine receptor subunit alpha-3	DrugBank
MOL000050	GLY	SHMT2 protein	DrugBank
MOL000050	GLY	Hypothetical protein DKFZp686P09201	DrugBank
MOL000050	GLY	NADP-dependent malic enzyme, mitochondrial	DrugBank
MOL000050	GLY	Choline/ethanolamine kinase [Includes: Choline kinase beta	DrugBank
MOL000050	GLY	5-aminolevulinate synthase, nonspecific, mitochondrial	DrugBank
MOL000050	GLY	Migration-inducing protein 4	DrugBank
MOL000050	GLY	L-lactate dehydrogenase B chain	DrugBank
MOL000050	GLY	Trypsin-3	DrugBank
MOL000050	GLY	HCMV DNA polymerase	DrugBank
MOL000050	GLY	mRNA of Protein-tyrosine phosphatase, non-receptor type 1	DrugBank
MOL000050	GLY	Glutamate receptor 1	DrugBank
MOL000050	GLY	5-oxoprolinase	DrugBank
MOL000050	GLY	Calcium-binding mitochondrial carrier protein Aralar2	DrugBank
MOL000050	GLY	Urease	DrugBank
MOL000050	GLY	UDP-glucose 4-epimerase	DrugBank
MOL000050	GLY	Amine oxidase [flavin-containing] A	DrugBank
MOL000050	GLY	mRNA of PKA Catalytic Subunit C-alpha	DrugBank
MOL000050	GLY	Parathion hydrolase	DrugBank
MOL000050	GLY	Benzoylformate decarboxylase	DrugBank
MOL000050	GLY	Bifunctional polymyxin resistance protein arnA	DrugBank
MOL000050	GLY	Gamma-aminobutyraldehyde dehydrogenase	DrugBank
MOL000050	GLY	Pyruvate-ferredoxin oxidoreductase	DrugBank
MOL000050	GLY	Malonamidase E2	DrugBank
MOL000050	GLY	Pyruvate carboxylase, mitochondrial	DrugBank
MOL000050	GLY	Succinate dehydrogenase [ubiquinone] flavoprotein subunit, mitochondrial	DrugBank
MOL000050	GLY	Glucose-6-phosphate isomerase	DrugBank
MOL000050	GLY	Vacuolar ATP synthase catalytic subunit A	DrugBank
MOL000050	GLY	Retinal dehydrogenase 1	DrugBank
MOL000050	GLY	Deacetoxycephalosporin C synthetase	DrugBank
MOL000050	GLY	Glutamate receptor, ionotropic kainate 2	DrugBank
MOL000050	GLY	Glycogen synthase 1	DrugBank
MOL000050	GLY	Glucarate dehydratase	DrugBank
MOL005030	gondoic acid	Prostaglandin G/H synthase 1	DrugBank
MOL005030	gondoic acid	Nuclear receptor coactivator 2	DrugBank
MOL005125	ANN	Prostaglandin G/H synthase 1	DrugBank
MOL005125	ANN	Prostaglandin G/H synthase 2	DrugBank
MOL005125	ANN	Amine oxidase [flavin-containing] B	DrugBank
MOL005125	ANN	Amine oxidase [flavin-containing] A	DrugBank
MOL005125	ANN	Lysozyme	DrugBank
MOL005125	ANN	Group IIE secretory phospholipase A2	DrugBank
MOL000513	3,4,5-trihydroxybenzoic acid	Prostaglandin G/H synthase 1	DrugBank
MOL000513	3,4,5-trihydroxybenzoic acid	Prostaglandin G/H synthase 2	DrugBank
MOL000513	3,4,5-trihydroxybenzoic acid	Amine oxidase [flavin-containing] B	DrugBank
MOL000513	3,4,5-trihydroxybenzoic acid	Progesterone receptor	DrugBank
MOL000513	3,4,5-trihydroxybenzoic acid	mRNA of Protein-tyrosine phosphatase, non-receptor type 1	DrugBank
MOL000513	3,4,5-trihydroxybenzoic acid	DNA topoisomerase II	DrugBank
MOL000513	3,4,5-trihydroxybenzoic acid	Heat shock protein HSP 90	DrugBank
MOL000513	3,4,5-trihydroxybenzoic acid	Phosphatidylinositol-4,5-bisphosphate 3-kinase catalytic subunit, gamma isoform	DrugBank
MOL000513	3,4,5-trihydroxybenzoic acid	Caspase-9	N/A	validated
MOL000513	3,4,5-trihydroxybenzoic acid	Caspase-3	N/A	validated
MOL000513	3,4,5-trihydroxybenzoic acid	Cellular tumor antigen p53	DrugBank	validated
MOL000513	3,4,5-trihydroxybenzoic acid	Fatty acid synthase	DrugBank	validated
MOL000513	3,4,5-trihydroxybenzoic acid	Tumor necrosis factor ligand superfamily member 6	N/A	validated
MOL000513	3,4,5-trihydroxybenzoic acid	Microsomal glutathione S-transferase 1	DrugBank	validated
MOL000513	3,4,5-trihydroxybenzoic acid	Cytochrome P450 3A43	N/A	validated
MOL000519	coniferin	Muscarinic acetylcholine receptor M3	DrugBank
MOL000519	coniferin	Muscarinic acetylcholine receptor M1	DrugBank
MOL000519	coniferin	Estrogen receptor	DrugBank
MOL000519	coniferin	Androgen receptor	DrugBank
MOL000519	coniferin	Sodium channel protein type 5 subunit alpha	DrugBank
MOL000519	coniferin	Peroxisome proliferator activated receptor gamma	DrugBank
MOL000519	coniferin	Prostaglandin G/H synthase 2	DrugBank
MOL000519	coniferin	Carbonic anhydrase II	DrugBank
MOL000519	coniferin	CGMP-inhibited 3',5'-cyclic phosphodiesterase A	DrugBank
MOL000519	coniferin	Alpha-1B adrenergic receptor	DrugBank
MOL000519	coniferin	Beta-2 adrenergic receptor	DrugBank
MOL000519	coniferin	Alpha-1D adrenergic receptor	DrugBank
MOL000519	coniferin	DNA topoisomerase II	DrugBank
MOL000519	coniferin	Mu-type opioid receptor	DrugBank
MOL000519	coniferin	Cell division protein kinase 2	DrugBank
MOL000519	coniferin	Beta-lactamase	DrugBank
MOL000519	coniferin	Neuronal acetylcholine receptor protein, alpha-7 chain	DrugBank
MOL000519	coniferin	Ig gamma-1 chain C region	DrugBank
MOL000519	coniferin	Proto-oncogene serine/threonine-protein kinase Pim-1	DrugBank
MOL000519	coniferin	Cyclin-A2	DrugBank
MOL000519	coniferin	Nuclear receptor coactivator 2	DrugBank
MOL000519	coniferin	Nuclear receptor coactivator 1	DrugBank
MOL000052	Gulutamine	Prostaglandin G/H synthase 1	DrugBank
MOL000052	Gulutamine	Nitric-oxide synthase, brain	DrugBank
MOL000052	Gulutamine	4-aminobutyrate aminotransferase, mitochondrial	DrugBank
MOL000052	Gulutamine	Prostaglandin G/H synthase 2	DrugBank
MOL000052	Gulutamine	Aspartate aminotransferase, cytoplasmic	DrugBank
MOL000052	Gulutamine	mRNA of Protein-tyrosine phosphatase, non-receptor type 1	DrugBank
MOL000052	Gulutamine	Aldose reductase	DrugBank
MOL000052	Gulutamine	Arginase II, mitochondrial	DrugBank
MOL000052	Gulutamine	Glutamate [NMDA] receptor subunit epsilon 1	DrugBank
MOL000052	Gulutamine	Gamma-aminobutyric acid receptor subunit alpha-1	DrugBank
MOL000052	Gulutamine	Cathepsin D	DrugBank
MOL000052	Gulutamine	Leukotriene A-4 hydrolase	DrugBank
MOL000052	Gulutamine	mRNA of PKA Catalytic Subunit C-alpha	DrugBank
MOL000052	Gulutamine	Alcohol dehydrogenase 1B	DrugBank
MOL000052	Gulutamine	Aspartate aminotransferase	DrugBank
MOL000052	Gulutamine	Ferrichrome-iron receptor	DrugBank
MOL000052	Gulutamine	Bacillolysin	DrugBank
MOL000052	Gulutamine	Growth-inhibiting protein 18	DrugBank
MOL000052	Gulutamine	Glutamate dehydrogenase 1, mitochondrial	DrugBank
MOL000052	Gulutamine	Ornithine carbamoyltransferase, mitochondrial	DrugBank
MOL000052	Gulutamine	Aspartate aminotransferase, mitochondrial	DrugBank
MOL000052	Gulutamine	Glutamate receptor 2	DrugBank
MOL000052	Gulutamine	S-adenosylmethionine synthetase isoform type-1	DrugBank
MOL000052	Gulutamine	Glutamate receptor, ionotropic kainate 2	DrugBank
MOL000052	Gulutamine	Triosephosphate isomerase	DrugBank
MOL000052	Gulutamine	Glutamate [NMDA] receptor subunit 3A	DrugBank
MOL000052	Gulutamine	Gamma-aminobutyric-acid receptor subunit alpha-6	DrugBank
MOL000052	Gulutamine	Alanine aminotransferase 1	DrugBank
MOL000052	Gulutamine	Calcium-transporting ATPase type 2C member 1	DrugBank
MOL000052	Gulutamine	NAD-dependent malic enzyme, mitochondrial	DrugBank
MOL000054	L-	Nitric-oxide synthase, brain	DrugBank
MOL000054	L-	Prostaglandin G/H synthase 2	DrugBank
MOL005448	Leucinum	Nitric-oxide synthase, brain	DrugBank
MOL005448	Leucinum	4-aminobutyrate aminotransferase, mitochondrial	DrugBank
MOL005448	Leucinum	Branched chain amino acid-dependent aminotransferase	DrugBank
MOL005448	Leucinum	Aldose reductase	DrugBank
MOL005448	Leucinum	Gamma-aminobutyric acid receptor subunit alpha-1	DrugBank
MOL005448	Leucinum	Cathepsin D	DrugBank
MOL005448	Leucinum	Cholinesterase	DrugBank
MOL005448	Leucinum	Ferrichrome-iron receptor	DrugBank
MOL005448	Leucinum	Alcohol dehydrogenase 1C	DrugBank
MOL005448	Leucinum	Cytochrome P450-cam	DrugBank
MOL005448	Leucinum	Bacillolysin	DrugBank
MOL005448	Leucinum	Prostaglandin G/H synthase 1	DrugBank
MOL000055	L-Lysin	High-affinity cationic amino acid transporter-1	DrugBank
MOL000055	L-Lysin	Cationic amino acid transporter 4	DrugBank
MOL000056	DTY	Prostaglandin G/H synthase 1	DrugBank
MOL000056	DTY	Dopamine D1 receptor	DrugBank
MOL000056	DTY	Thrombin	DrugBank
MOL000056	DTY	Muscarinic acetylcholine receptor M1	DrugBank
MOL000056	DTY	Beta-1 adrenergic receptor	DrugBank
MOL000056	DTY	Prostaglandin G/H synthase 2	DrugBank
MOL000056	DTY	Nitric-oxide synthase, endothelial	DrugBank
MOL000056	DTY	Alpha-2A adrenergic receptor	DrugBank
MOL000056	DTY	Alpha-2C adrenergic receptor	DrugBank
MOL000056	DTY	Acetylcholinesterase	DrugBank
MOL000056	DTY	Alpha-1A adrenergic receptor	DrugBank
MOL000056	DTY	Alpha-2B adrenergic receptor	DrugBank
MOL000056	DTY	Alpha-1B adrenergic receptor	DrugBank
MOL000056	DTY	Beta-2 adrenergic receptor	DrugBank
MOL000056	DTY	Dipeptidyl peptidase IV	DrugBank
MOL000056	DTY	Beta-lactamase	DrugBank
MOL000056	DTY	Amine oxidase [flavin-containing] B	DrugBank
MOL000056	DTY	Chymotrypsinogen B	DrugBank
MOL000056	DTY	mRNA of Protein-tyrosine phosphatase, non-receptor type 1	DrugBank
MOL000056	DTY	Sodium-dependent dopamine transporter	DrugBank
MOL000056	DTY	Amine oxidase [flavin-containing] A	DrugBank
MOL000579	hydroquinone	Alcohol dehydrogenase 1C	DrugBank
MOL000579	hydroquinone	Lysozyme	DrugBank
MOL000579	hydroquinone	Bacillolysin	DrugBank
MOL000579	hydroquinone	Nicotinate-nucleotide--dimethylbenzimidazole phosphoribosyltransferase	DrugBank
MOL000579	hydroquinone	Transcription factor p65	N/A	validated
MOL000579	hydroquinone	Tumor necrosis factor	DrugBank	validated
MOL006240	THM	Prostaglandin G/H synthase 1	DrugBank
MOL006240	THM	Androgen receptor	DrugBank
MOL006240	THM	Prostaglandin G/H synthase 2	DrugBank
MOL006240	THM	Carbonic anhydrase II	DrugBank
MOL006240	THM	mRNA of Protein-tyrosine phosphatase, non-receptor type 1	DrugBank
MOL006240	THM	Aldose reductase	DrugBank
MOL006240	THM	Dipeptidyl peptidase IV	DrugBank
MOL006240	THM	Heat shock protein HSP 90	DrugBank
MOL006240	THM	Phosphatidylinositol-4,5-bisphosphate 3-kinase catalytic subunit, gamma isoform	DrugBank
MOL006240	THM	Trypsin-1	DrugBank
MOL006240	THM	Nuclear receptor coactivator 2	DrugBank
MOL000065	ASI	Nitric-oxide synthase, brain	DrugBank
MOL000065	ASI	4-aminobutyrate aminotransferase, mitochondrial	DrugBank
MOL000065	ASI	Aspartate aminotransferase, cytoplasmic	DrugBank
MOL000065	ASI	mRNA of Protein-tyrosine phosphatase, non-receptor type 1	DrugBank
MOL000065	ASI	Aldose reductase	DrugBank
MOL000065	ASI	Gamma-aminobutyric acid receptor subunit alpha-1	DrugBank
MOL000065	ASI	Cathepsin D	DrugBank
MOL000065	ASI	M-phase inducer phosphatase 2	DrugBank
MOL000065	ASI	Cholinesterase	DrugBank
MOL000065	ASI	Alcohol dehydrogenase 1B	DrugBank
MOL000065	ASI	Alcohol dehydrogenase 1C	DrugBank
MOL000065	ASI	Cytochrome P450-cam	DrugBank
MOL000065	ASI	Aspartate aminotransferase	DrugBank
MOL000065	ASI	Ferrichrome-iron receptor	DrugBank
MOL000065	ASI	Adenylosuccinate synthetase	DrugBank
MOL000065	ASI	Bacillolysin	DrugBank
MOL000065	ASI	1-aminocyclopropane-1-carboxylate deaminase	DrugBank
MOL000065	ASI	Growth-inhibiting protein 18	DrugBank
MOL000065	ASI	Glutamate dehydrogenase 1, mitochondrial	DrugBank
MOL000065	ASI	Aspartate aminotransferase, mitochondrial	DrugBank
MOL000065	ASI	Creatine kinase M-type	DrugBank
MOL000065	ASI	S-adenosylmethionine synthetase isoform type-1	DrugBank
MOL000065	ASI	Triosephosphate isomerase	DrugBank
MOL000065	ASI	NAD-dependent malic enzyme, mitochondrial	DrugBank
MOL000065	ASI	Arachidonate 5-lipoxygenase	DrugBank
MOL000065	ASI	Glutamate receptor 1	DrugBank
MOL000065	ASI	Glycogen phosphorylase, muscle form	DrugBank
MOL000065	ASI	mRNA of PKA Catalytic Subunit C-alpha	DrugBank
MOL000065	ASI	Methionyl-tRNA synthetase	DrugBank
MOL000065	ASI	Formate acetyltransferase 1	DrugBank
MOL000065	ASI	Monomeric sarcosine oxidase	DrugBank
MOL000065	ASI	Nicotinate-nucleotide--dimethylbenzimidazole phosphoribosyltransferase	DrugBank
MOL000065	ASI	Ornithine carbamoyltransferase, mitochondrial	DrugBank
MOL000065	ASI	Pyruvate kinase isozymes M1/M2	DrugBank
MOL000065	ASI	Serine--pyruvate aminotransferase	DrugBank
MOL000065	ASI	Prolyl 3-hydroxylase 3	DrugBank
MOL000065	ASI	Glycine amidinotransferase, mitochondrial	DrugBank
MOL000065	ASI	Adenylosuccinate synthetase isozyme 1	DrugBank
MOL000065	ASI	NADP-dependent malic enzyme, mitochondrial	DrugBank
MOL000065	ASI	Dihydroorotase	DrugBank
MOL000065	ASI	Arginase-1	DrugBank
MOL000065	ASI	D-alanyl-D-alanine carboxypeptidase	DrugBank
MOL000065	ASI	Aromatic-amino-acid aminotransferase	DrugBank
MOL000065	ASI	Calcium-binding mitochondrial carrier protein Aralar1	DrugBank
MOL000065	ASI	Succinate dehydrogenase [ubiquinone] flavoprotein subunit, mitochondrial	DrugBank
MOL000065	ASI	S-adenosylmethionine synthetase isoform type-2	DrugBank
MOL000065	ASI	Glutamate dehydrogenase 2, mitochondrial	DrugBank
MOL000065	ASI	Glutamate receptor, ionotropic kainate 2	DrugBank
MOL000065	ASI	Mitochondrial aspartate-glutamate carrier protein	DrugBank
MOL000065	ASI	Calcium-binding mitochondrial carrier protein Aralar2	DrugBank
MOL006594	Eciphin	Prostaglandin G/H synthase 1	DrugBank
MOL006594	Eciphin	Muscarinic acetylcholine receptor M3	DrugBank
MOL006594	Eciphin	Thrombin	DrugBank
MOL006594	Eciphin	Muscarinic acetylcholine receptor M1	DrugBank
MOL006594	Eciphin	Beta-1 adrenergic receptor	DrugBank
MOL006594	Eciphin	Sodium channel protein type 5 subunit alpha	DrugBank
MOL006594	Eciphin	Prostaglandin G/H synthase 2	DrugBank
MOL006594	Eciphin	Nitric-oxide synthase, endothelial	DrugBank
MOL006594	Eciphin	Alpha-2A adrenergic receptor	DrugBank
MOL006594	Eciphin	Alpha-2C adrenergic receptor	DrugBank
MOL006594	Eciphin	Acetylcholinesterase	DrugBank
MOL006594	Eciphin	Sodium-dependent noradrenaline transporter	DrugBank
MOL006594	Eciphin	Alpha-1A adrenergic receptor	DrugBank
MOL006594	Eciphin	Muscarinic acetylcholine receptor M2	DrugBank
MOL006594	Eciphin	Alpha-2B adrenergic receptor	DrugBank
MOL006594	Eciphin	Alpha-1B adrenergic receptor	DrugBank
MOL006594	Eciphin	Sodium-dependent dopamine transporter	DrugBank
MOL006594	Eciphin	Beta-2 adrenergic receptor	DrugBank
MOL006594	Eciphin	Alpha-1D adrenergic receptor	DrugBank
MOL006594	Eciphin	Sodium-dependent serotonin transporter	DrugBank
MOL006594	Eciphin	Dipeptidyl peptidase IV	DrugBank
MOL006594	Eciphin	Beta-lactamase	DrugBank
MOL006594	Eciphin	Amine oxidase [flavin-containing] B	DrugBank
MOL006594	Eciphin	Amine oxidase [flavin-containing] A	DrugBank
MOL006594	Eciphin	Urokinase-type plasminogen activator	DrugBank
MOL006597	OMD	Prostaglandin G/H synthase 1	DrugBank
MOL006597	OMD	Beta-1 adrenergic receptor	DrugBank
MOL006597	OMD	Prostaglandin G/H synthase 2	DrugBank
MOL006597	OMD	Alpha-2A adrenergic receptor	DrugBank
MOL006597	OMD	Alpha-2C adrenergic receptor	DrugBank
MOL006597	OMD	Beta-2 adrenergic receptor	DrugBank
MOL006597	OMD	Amine oxidase [flavin-containing] B	DrugBank
MOL006597	OMD	Amine oxidase [flavin-containing] A	DrugBank
MOL006597	OMD	Penicillin G acylase	DrugBank
MOL006597	OMD	Chymotrypsinogen B	DrugBank
MOL000067	L-Valin	Prostaglandin G/H synthase 1	DrugBank
MOL000067	L-Valin	Nitric-oxide synthase, brain	DrugBank
MOL000067	L-Valin	4-aminobutyrate aminotransferase, mitochondrial	DrugBank
MOL000067	L-Valin	Prostaglandin G/H synthase 2	DrugBank
MOL000067	L-Valin	Glycine receptor alpha-1 chain	DrugBank
MOL000067	L-Valin	mRNA of Protein-tyrosine phosphatase, non-receptor type 1	DrugBank
MOL000067	L-Valin	Branched chain amino acid-dependent aminotransferase	DrugBank
MOL000067	L-Valin	Aldose reductase	DrugBank
MOL000067	L-Valin	Gamma-aminobutyric acid receptor subunit alpha-1	DrugBank
MOL000067	L-Valin	Cholinesterase	DrugBank
MOL000067	L-Valin	Alcohol dehydrogenase 1C	DrugBank
MOL000067	L-Valin	Cytochrome P450-cam	DrugBank
MOL000067	L-Valin	Aspartate aminotransferase	DrugBank
MOL000067	L-Valin	Ferrichrome-iron receptor	DrugBank
MOL000067	L-Valin	Bacillolysin	DrugBank
MOL000067	L-Valin	1-aminocyclopropane-1-carboxylate deaminase	DrugBank
MOL000067	L-Valin	Glycine amidinotransferase, mitochondrial	DrugBank
MOL000067	L-Valin	NAD-dependent malic enzyme, mitochondrial	DrugBank
MOL000067	L-Valin	Haloalkane dehalogenase	DrugBank
MOL000067	L-Valin	Aspartate aminotransferase, cytoplasmic	DrugBank
MOL000067	L-Valin	Cathepsin D	DrugBank
MOL000067	L-Valin	Formate dehydrogenase H	DrugBank
MOL000067	L-Valin	Deacetoxycephalosporin C synthetase	DrugBank
MOL000067	L-Valin	2-isopropylmalate synthase	DrugBank
MOL000067	L-Valin	Ornithine carbamoyltransferase, mitochondrial	DrugBank
MOL000067	L-Valin	Cystathionine gamma-lyase	DrugBank
MOL000067	L-Valin	S-adenosylmethionine synthetase isoform type-1	DrugBank
MOL000067	L-Valin	Amine oxidase [flavin-containing] B	DrugBank
MOL000675	oleic acid	Prostaglandin G/H synthase 1	DrugBank
MOL000675	oleic acid	Nuclear receptor coactivator 2	DrugBank
MOL000675	oleic acid	Prostaglandin G/H synthase 2	DrugBank
MOL000675	oleic acid	Alcohol dehydrogenase 1B	DrugBank
MOL000675	oleic acid	Alcohol dehydrogenase 1C	DrugBank
MOL000675	oleic acid	Alcohol dehydrogenase 1A	DrugBank
MOL000675	oleic acid	Lysozyme	DrugBank
MOL000675	oleic acid	Nicotinate-nucleotide--dimethylbenzimidazole phosphoribosyltransferase	DrugBank
MOL000675	oleic acid	Trypsin-3	DrugBank
MOL000675	oleic acid	Retinoic acid receptor RXR-alpha	DrugBank
MOL000675	oleic acid	Cytochrome P450-cam	DrugBank
MOL000675	oleic acid	Urokinase-type plasminogen activator	DrugBank	validated
MOL000675	oleic acid	Superoxide dismutase [Cu-Zn]	DrugBank	validated
MOL000675	oleic acid	Catalase	DrugBank	validated
MOL000675	oleic acid	Telomerase protein component 1	N/A	validated
MOL000675	oleic acid	Endothelin-1	N/A	validated
MOL000675	oleic acid	Receptor tyrosine-protein kinase erbB-2	N/A	validated
MOL000675	oleic acid	Peroxisome proliferator-activated receptor gamma	N/A	validated
MOL000675	oleic acid	Lipoprotein lipase	DrugBank	validated
MOL000675	oleic acid	Neuromodulin	N/A	validated
MOL000675	oleic acid	Plasminogen activator inhibitor 1	N/A	validated
MOL000675	oleic acid	Brain-derived neurotrophic factor	N/A	validated
MOL000675	oleic acid	3-hydroxy-3-methylglutaryl-coenzyme A reductase	DrugBank	validated
MOL000675	oleic acid	Myeloperoxidase	DrugBank	validated
MOL000675	oleic acid	Peroxisome proliferator-activated receptor alpha	N/A	validated
MOL000675	oleic acid	Peroxisome proliferator-activated receptor delta	N/A	validated
MOL000675	oleic acid	C-reactive protein	N/A	validated
MOL000675	oleic acid	Serum paraoxonase/arylesterase 1	DrugBank	validated
MOL000675	oleic acid	Insulin	DrugBank	validated
MOL000675	oleic acid	Plasminogen	DrugBank	validated
MOL000675	oleic acid	Fatty acid-binding protein, liver	N/A	validated
MOL000675	oleic acid	Retinol-binding protein 2	N/A	validated
MOL000675	oleic acid	Glucagon	N/A	validated
MOL000675	oleic acid	Glutamyl aminopeptidase	DrugBank	validated
MOL000675	oleic acid	Mitochondrial uncoupling protein 2	N/A	validated
MOL000675	oleic acid	Sterol O-acyltransferase 1	DrugBank	validated
MOL000675	oleic acid	Cholecystokinin	N/A	validated
MOL000675	oleic acid	Cbp/p300-interacting transactivator 1	N/A	validated
MOL000675	oleic acid	BDNF/NT-3 growth factors receptor	DrugBank	validated
MOL000675	oleic acid	Pancreas/duodenum homeobox protein 1	N/A	validated
MOL000675	oleic acid	Solute carrier family 2, facilitated glucose transporter member 2	N/A	validated
MOL000675	oleic acid	Peptidyl-glycine alpha-amidating monooxygenase	DrugBank	validated
MOL000675	oleic acid	Acyl-CoA desaturase	N/A	validated
MOL000675	oleic acid	Mitochondrial uncoupling protein 3	N/A	validated
MOL000675	oleic acid	Cholesteryl ester transfer protein	N/A	validated
MOL000675	oleic acid	Peptide YY	N/A	validated
MOL000675	oleic acid	Aspartyl aminopeptidase	DrugBank	validated
MOL000675	oleic acid	Cell-death-related nuclease 7	N/A	validated
MOL000068	L-Ile	Nitric-oxide synthase, brain	DrugBank
MOL000068	L-Ile	4-aminobutyrate aminotransferase, mitochondrial	DrugBank
MOL000068	L-Ile	Branched chain amino acid-dependent aminotransferase	DrugBank
MOL000068	L-Ile	Gamma-aminobutyric acid receptor subunit alpha-1	DrugBank
MOL000068	L-Ile	Cathepsin D	DrugBank
MOL000068	L-Ile	Cholinesterase	DrugBank
MOL000068	L-Ile	Alcohol dehydrogenase 1C	DrugBank
MOL000068	L-Ile	Cytochrome P450-cam	DrugBank
MOL000068	L-Ile	Ferrichrome-iron receptor	DrugBank
MOL000068	L-Ile	Bacillolysin	DrugBank
MOL000068	L-Ile	Gamma-aminobutyric-acid receptor subunit alpha-6	DrugBank
MOL000068	L-Ile	Glycine amidinotransferase, mitochondrial	DrugBank
MOL000068	L-Ile	Branched-chain-amino-acid aminotransferase, cytosolic	DrugBank
MOL000068	L-Ile	Renin, renal	DrugBank
MOL006844	Norharman	Prostaglandin G/H synthase 1	DrugBank
MOL006844	Norharman	Prostaglandin G/H synthase 2	DrugBank
MOL006844	Norharman	Amine oxidase [flavin-containing] B	DrugBank
MOL006844	Norharman	Nuclear receptor coactivator 2	DrugBank
MOL000069	palmitic acid	Cathepsin D	DrugBank
MOL000069	palmitic acid	Alcohol dehydrogenase 1B	DrugBank
MOL000069	palmitic acid	Alcohol dehydrogenase 1C	DrugBank
MOL000069	palmitic acid	Prostaglandin G/H synthase 1	DrugBank
MOL000069	palmitic acid	Prostaglandin G/H synthase 2	DrugBank
MOL000069	palmitic acid	Rhodopsin	DrugBank
MOL000069	palmitic acid	Ig gamma-1 chain C region	DrugBank
MOL000069	palmitic acid	Ferrichrome-iron receptor	DrugBank
MOL000069	palmitic acid	Nuclear receptor coactivator 2	DrugBank
MOL000069	palmitic acid	Apoptosis regulator Bcl-2	DrugBank	validated
MOL000069	palmitic acid	Interleukin-10	N/A	validated
MOL000069	palmitic acid	Tumor necrosis factor	DrugBank	validated
MOL000069	palmitic acid	Collagen alpha-1(I) chain	DrugBank	validated
MOL000069	palmitic acid	Phosphatidylinositol-3,4,5-trisphosphate 3-phosphatase and dual-specificity protein phosphatase PTEN	N/A	validated
MOL000069	palmitic acid	Putative beta-glucuronidase-like protein SMA3	N/A	validated
MOL000069	palmitic acid	Solute carrier family 22 member 5	N/A	validated
MOL000069	palmitic acid	Choline-phosphate cytidylyltransferase A	DrugBank	validated
MOL006930	(+) isolariciresinol 9-o-尾-d-glucopyranoside	DNA topoisomerase II	DrugBank
MOL006931	isolariciresino	Estrogen receptor	DrugBank
MOL006931	isolariciresino	Androgen receptor	DrugBank
MOL006931	isolariciresino	Peroxisome proliferator activated receptor gamma	DrugBank
MOL006931	isolariciresino	Coagulation factor Xa	DrugBank
MOL006931	isolariciresino	Prostaglandin G/H synthase 2	DrugBank
MOL006931	isolariciresino	Nitric-oxide synthase, endothelial	DrugBank
MOL006931	isolariciresino	Carbonic anhydrase II	DrugBank
MOL006931	isolariciresino	Coagulation factor VII	DrugBank
MOL006931	isolariciresino	Alpha-1B adrenergic receptor	DrugBank
MOL006931	isolariciresino	Beta-2 adrenergic receptor	DrugBank
MOL006931	isolariciresino	DNA topoisomerase II	DrugBank
MOL006931	isolariciresino	Estrogen receptor beta	DrugBank
MOL006931	isolariciresino	Glycogen synthase kinase-3 beta	DrugBank
MOL006931	isolariciresino	Heat shock protein HSP 90	DrugBank
MOL006931	isolariciresino	Serine/threonine-protein kinase Chk1	DrugBank
MOL006931	isolariciresino	Proto-oncogene serine/threonine-protein kinase Pim-1	DrugBank
MOL006931	isolariciresino	Nuclear receptor coactivator 2	DrugBank
MOL006931	isolariciresino	Calmodulin	DrugBank
MOL006931	isolariciresino	Potassium voltage-gated channel subfamily H member 2	DrugBank
MOL006931	isolariciresino	Sodium channel protein type 5 subunit alpha	DrugBank
MOL006931	isolariciresino	Mitogen-activated protein kinase 14	DrugBank
MOL006931	isolariciresino	CGMP-inhibited 3',5'-cyclic phosphodiesterase A	DrugBank
MOL006931	isolariciresino	Cyclin-A2	DrugBank
MOL006932	l-Pseudoephedrine	Prostaglandin G/H synthase 1	DrugBank
MOL006932	l-Pseudoephedrine	Muscarinic acetylcholine receptor M3	DrugBank
MOL006932	l-Pseudoephedrine	Thrombin	DrugBank
MOL006932	l-Pseudoephedrine	Muscarinic acetylcholine receptor M1	DrugBank
MOL006932	l-Pseudoephedrine	Beta-1 adrenergic receptor	DrugBank
MOL006932	l-Pseudoephedrine	Sodium channel protein type 5 subunit alpha	DrugBank
MOL006932	l-Pseudoephedrine	Prostaglandin G/H synthase 2	DrugBank
MOL006932	l-Pseudoephedrine	Nitric-oxide synthase, endothelial	DrugBank
MOL006932	l-Pseudoephedrine	Alpha-2A adrenergic receptor	DrugBank
MOL006932	l-Pseudoephedrine	Alpha-2C adrenergic receptor	DrugBank
MOL006932	l-Pseudoephedrine	Sodium-dependent noradrenaline transporter	DrugBank
MOL006932	l-Pseudoephedrine	Alpha-1A adrenergic receptor	DrugBank
MOL006932	l-Pseudoephedrine	Muscarinic acetylcholine receptor M2	DrugBank
MOL006932	l-Pseudoephedrine	Alpha-2B adrenergic receptor	DrugBank
MOL006932	l-Pseudoephedrine	Alpha-1B adrenergic receptor	DrugBank
MOL006932	l-Pseudoephedrine	Sodium-dependent dopamine transporter	DrugBank
MOL006932	l-Pseudoephedrine	Beta-2 adrenergic receptor	DrugBank
MOL006932	l-Pseudoephedrine	Alpha-1D adrenergic receptor	DrugBank
MOL006932	l-Pseudoephedrine	Sodium-dependent serotonin transporter	DrugBank
MOL006932	l-Pseudoephedrine	Dipeptidyl peptidase IV	DrugBank
MOL006932	l-Pseudoephedrine	Urokinase-type plasminogen activator	DrugBank
MOL006932	l-Pseudoephedrine	Beta-lactamase	DrugBank
MOL006932	l-Pseudoephedrine	Amine oxidase [flavin-containing] A	DrugBank
MOL006934	WLN: Q5Q	mRNA of PKA Catalytic Subunit C-alpha	DrugBank
MOL006934	WLN: Q5Q	Alcohol dehydrogenase 1B	DrugBank
MOL006934	WLN: Q5Q	Alcohol dehydrogenase 1C	DrugBank
MOL006934	WLN: Q5Q	Haloalkane dehalogenase	DrugBank
MOL006934	WLN: Q5Q	Trypsin-3	DrugBank
MOL006935	Octylene	Alcohol dehydrogenase 1B	DrugBank
MOL006935	Octylene	Alcohol dehydrogenase 1C	DrugBank
MOL006935	Octylene	Trypsin-3	DrugBank
MOL006936	10,13-eicosadienoic	Prostaglandin G/H synthase 1	DrugBank
MOL006936	10,13-eicosadienoic	Nuclear receptor coactivator 2	DrugBank
MOL006938	DUR	Prostaglandin G/H synthase 2	DrugBank
MOL006938	DUR	Carbonic anhydrase II	DrugBank
MOL006938	DUR	Gamma-aminobutyric acid receptor subunit alpha-1	DrugBank
MOL006940	D-2-Aminobutyrate	Prostaglandin G/H synthase 1	DrugBank
MOL006940	D-2-Aminobutyrate	4-aminobutyrate aminotransferase, mitochondrial	DrugBank
MOL006940	D-2-Aminobutyrate	Glutamate [NMDA] receptor subunit zeta-1	DrugBank
MOL006940	D-2-Aminobutyrate	Kynureninase	DrugBank
MOL006940	D-2-Aminobutyrate	Glycine receptor alpha-1 chain	DrugBank
MOL006940	D-2-Aminobutyrate	Aspartate aminotransferase, cytoplasmic	DrugBank
MOL006940	D-2-Aminobutyrate	mRNA of Protein-tyrosine phosphatase, non-receptor type 1	DrugBank
MOL006940	D-2-Aminobutyrate	Aldose reductase	DrugBank
MOL006940	D-2-Aminobutyrate	Gamma-aminobutyric acid receptor subunit alpha-1	DrugBank
MOL006940	D-2-Aminobutyrate	Proto-oncogene tyrosine-protein kinase SRC	DrugBank
MOL006940	D-2-Aminobutyrate	Cathepsin D	DrugBank
MOL006940	D-2-Aminobutyrate	Cholinesterase	DrugBank
MOL006940	D-2-Aminobutyrate	Alcohol dehydrogenase 1B	DrugBank
MOL006940	D-2-Aminobutyrate	Alcohol dehydrogenase 1C	DrugBank
MOL006940	D-2-Aminobutyrate	Cytochrome P450-cam	DrugBank
MOL006940	D-2-Aminobutyrate	Aspartate aminotransferase	DrugBank
MOL006940	D-2-Aminobutyrate	Ferrichrome-iron receptor	DrugBank
MOL006940	D-2-Aminobutyrate	Adenylosuccinate synthetase	DrugBank
MOL006940	D-2-Aminobutyrate	Gag-Pol polyprotein	DrugBank
MOL006940	D-2-Aminobutyrate	Bacillolysin	DrugBank
MOL006940	D-2-Aminobutyrate	Haloalkane dehalogenase	DrugBank
MOL006940	D-2-Aminobutyrate	2-hydroxy-6-oxo-7-methylocta-2,4-dienoate hydrolase	DrugBank
MOL006940	D-2-Aminobutyrate	1-aminocyclopropane-1-carboxylate deaminase	DrugBank
MOL006940	D-2-Aminobutyrate	Growth-inhibiting protein 18	DrugBank
MOL006940	D-2-Aminobutyrate	Alanine aminotransferase 1	DrugBank
MOL006940	D-2-Aminobutyrate	Cystathionine gamma-lyase	DrugBank
MOL006940	D-2-Aminobutyrate	Glycine amidinotransferase, mitochondrial	DrugBank
MOL006940	D-2-Aminobutyrate	Cysteine desulfurase, mitochondrial	DrugBank
MOL006940	D-2-Aminobutyrate	Triosephosphate isomerase	DrugBank
MOL006940	D-2-Aminobutyrate	NAD-dependent malic enzyme, mitochondrial	DrugBank
MOL006940	D-2-Aminobutyrate	NADP-dependent malic enzyme, mitochondrial	DrugBank
MOL006940	D-2-Aminobutyrate	Trypsin-3	DrugBank
MOL006940	D-2-Aminobutyrate	Nitric-oxide synthase, brain	DrugBank
MOL006940	D-2-Aminobutyrate	Alcohol dehydrogenase 1A	DrugBank
MOL006940	D-2-Aminobutyrate	Histidinol dehydrogenase	DrugBank
MOL006940	D-2-Aminobutyrate	Formate acetyltransferase 1	DrugBank
MOL006940	D-2-Aminobutyrate	Serine--pyruvate aminotransferase	DrugBank
MOL006944	8-Octadecenoic acid	Prostaglandin G/H synthase 1	DrugBank
MOL006944	8-Octadecenoic acid	Ig gamma-1 chain C region	DrugBank
MOL006944	8-Octadecenoic acid	Nuclear receptor coactivator 2	DrugBank
MOL006949	6-Deoxy-gulose	Ferrichrome-iron receptor	DrugBank
MOL006949	6-Deoxy-gulose	Bacillolysin	DrugBank
MOL006951	pedatisectine a	Prostaglandin G/H synthase 2	DrugBank
MOL006951	pedatisectine a	mRNA of PKA Catalytic Subunit C-alpha	DrugBank
MOL006952	pedatisectine f	Prostaglandin G/H synthase 1	DrugBank
MOL006952	pedatisectine f	Prostaglandin G/H synthase 2	DrugBank
MOL006952	pedatisectine f	Acetylcholinesterase	DrugBank
MOL006953	Thy	Alcohol dehydrogenase 1C	DrugBank
MOL006953	Thy	Cytochrome P450-cam	DrugBank
MOL006954	BVE	Alcohol dehydrogenase 1B	DrugBank
MOL006954	BVE	Alcohol dehydrogenase 1C	DrugBank
MOL006954	BVE	Trypsin-3	DrugBank
MOL000875	Cedrol	Muscarinic acetylcholine receptor M3	DrugBank
MOL000875	Cedrol	Muscarinic acetylcholine receptor M1	DrugBank
MOL000875	Cedrol	Muscarinic acetylcholine receptor M2	DrugBank
MOL000875	Cedrol	Gamma-aminobutyric acid receptor subunit alpha-1	DrugBank
MOL000875	Cedrol	Neuronal acetylcholine receptor protein, alpha-7 chain	DrugBank
MOL006956	cyclo-(leu-tyr)	Beta-2 adrenergic receptor	DrugBank
MOL006957	(3S,6S)-3-(benzyl)-6-(4-hydroxybenzyl)piperazine-2,5-quinone	Androgen receptor	DrugBank
MOL006957	(3S,6S)-3-(benzyl)-6-(4-hydroxybenzyl)piperazine-2,5-quinone	Prostaglandin G/H synthase 2	DrugBank
MOL006957	(3S,6S)-3-(benzyl)-6-(4-hydroxybenzyl)piperazine-2,5-quinone	Beta-2 adrenergic receptor	DrugBank
MOL006957	(3S,6S)-3-(benzyl)-6-(4-hydroxybenzyl)piperazine-2,5-quinone	Calmodulin	DrugBank
MOL006958	cyclo-(val-tyr)	Prostaglandin G/H synthase 2	DrugBank
MOL006958	cyclo-(val-tyr)	Beta-2 adrenergic receptor	DrugBank
MOL006958	cyclo-(val-tyr)	mRNA of PKA Catalytic Subunit C-alpha	DrugBank
MOL003578	Cycloartenol	Mineralocorticoid receptor	DrugBank
MOL006960	(5R)-5-hydroxy-1-(4-hydroxy-3-methoxyphenyl)tetradecan-3-one	Estrogen receptor	DrugBank
MOL006960	(5R)-5-hydroxy-1-(4-hydroxy-3-methoxyphenyl)tetradecan-3-one	Beta-2 adrenergic receptor	DrugBank
MOL006962	2Z-hexadecenoic acid	Prostaglandin G/H synthase 1	DrugBank
MOL006962	2Z-hexadecenoic acid	Rhodopsin	DrugBank
MOL006962	2Z-hexadecenoic acid	Nuclear receptor coactivator 2	DrugBank
MOL006963	Ethyl linolelaidate	Nuclear receptor coactivator 2	DrugBank
MOL006967	beta-D-Ribofuranoside, xanthine-9	Purine nucleoside phosphorylase	DrugBank
MOL006967	beta-D-Ribofuranoside, xanthine-9	Prostaglandin G/H synthase 2	DrugBank
MOL006967	beta-D-Ribofuranoside, xanthine-9	Purine nucleoside phosphorylase deoD-type	DrugBank
MOL000697	MRY	Prostaglandin G/H synthase 1	DrugBank
MOL000697	MRY	4-aminobutyrate aminotransferase, mitochondrial	DrugBank
MOL000697	MRY	Aspartate aminotransferase, cytoplasmic	DrugBank
MOL000697	MRY	Aldose reductase	DrugBank
MOL000697	MRY	Cathepsin D	DrugBank
MOL000697	MRY	Cholinesterase	DrugBank
MOL000697	MRY	Alcohol dehydrogenase 1B	DrugBank
MOL000697	MRY	Alcohol dehydrogenase 1C	DrugBank
MOL000697	MRY	Ferrichrome-iron receptor	DrugBank
MOL000697	MRY	Formate acetyltransferase 1	DrugBank
MOL000697	MRY	Bacillolysin	DrugBank
MOL000697	MRY	Glycine amidinotransferase, mitochondrial	DrugBank
MOL000697	MRY	Trypsin-3	DrugBank
MOL000697	MRY	Glycine receptor alpha-1 chain	DrugBank
MOL000697	MRY	Cytochrome P450-cam	DrugBank
MOL000708	WLN: VHR	Alcohol dehydrogenase 1B	DrugBank
MOL000708	WLN: VHR	Alcohol dehydrogenase 1C	DrugBank
MOL000708	WLN: VHR	Alcohol dehydrogenase 1A	DrugBank
MOL000708	WLN: VHR	Lysozyme	DrugBank
MOL000708	WLN: VHR	Nicotinate-nucleotide--dimethylbenzimidazole phosphoribosyltransferase	DrugBank
MOL000708	WLN: VHR	Trypsin-3	DrugBank
MOL000071	Istidina	Prostaglandin G/H synthase 2	DrugBank
MOL000071	Istidina	Prostaglandin G/H synthase 1	DrugBank
MOL000748	HMF	Alcohol dehydrogenase 1C	DrugBank
MOL000748	HMF	Lysozyme	DrugBank
MOL000748	HMF	Nicotinate-nucleotide--dimethylbenzimidazole phosphoribosyltransferase	DrugBank
MOL000748	HMF	Muscarinic acetylcholine receptor M3	DrugBank
MOL000748	HMF	Thrombin	DrugBank
MOL000748	HMF	Muscarinic acetylcholine receptor M1	DrugBank
MOL000748	HMF	Gamma-aminobutyric-acid receptor alpha-2 subunit	DrugBank
MOL000748	HMF	Acetylcholinesterase	DrugBank
MOL000748	HMF	Gamma-aminobutyric-acid receptor alpha-5 subunit	DrugBank
MOL000748	HMF	Gamma-aminobutyric-acid receptor alpha-3 subunit	DrugBank
MOL000748	HMF	Muscarinic acetylcholine receptor M2	DrugBank
MOL000748	HMF	Gamma-aminobutyric acid receptor subunit alpha-1	DrugBank
MOL000748	HMF	Dipeptidyl peptidase IV	DrugBank
MOL000748	HMF	Cytochrome P450-cam	DrugBank
MOL000748	HMF	Ig gamma-1 chain C region	DrugBank
MOL000748	HMF	Alcohol dehydrogenase 1B	DrugBank
MOL000748	HMF	Prostaglandin G/H synthase 1	DrugBank
MOL000748	HMF	Prostaglandin G/H synthase 2	DrugBank
MOL000748	HMF	Glutamate receptor 2	DrugBank
MOL000748	HMF	Gamma-aminobutyric-acid receptor subunit alpha-6	DrugBank
MOL000860	stearic acid	Prostaglandin G/H synthase 1	DrugBank
MOL000860	stearic acid	Prostaglandin G/H synthase 2	DrugBank
MOL000860	stearic acid	Retinoic acid receptor RXR-alpha	DrugBank
MOL000860	stearic acid	Nuclear receptor coactivator 2	DrugBank
MOL000860	stearic acid	Ig gamma-1 chain C region	DrugBank
MOL000860	stearic acid	Transcription factor Sp1	N/A	validated
MOL000860	stearic acid	Ectonucleotide pyrophosphatase/phosphodiesterase family member 7	N/A	validated
MOL000089	catechol	Catechol O-methyltransferase	N/A	validated
MOL000089	catechol	Transcriptional activator Myb	N/A	validated
MOL000908	beta-elemene	Prostaglandin G/H synthase 2	DrugBank
MOL000908	beta-elemene	Gamma-aminobutyric-acid receptor alpha-2 subunit	DrugBank
MOL000908	beta-elemene	Retinoic acid receptor RXR-alpha	DrugBank
MOL000908	beta-elemene	Sodium-dependent noradrenaline transporter	DrugBank
MOL000908	beta-elemene	Gamma-aminobutyric-acid receptor alpha-3 subunit	DrugBank
MOL000908	beta-elemene	Muscarinic acetylcholine receptor M2	DrugBank
MOL000908	beta-elemene	Gamma-aminobutyric acid receptor subunit alpha-1	DrugBank
MOL000908	beta-elemene	Gamma-aminobutyric-acid receptor subunit alpha-6	DrugBank
MOL000908	beta-elemene	Prostaglandin G/H synthase 1	DrugBank
MOL000908	beta-elemene	Muscarinic acetylcholine receptor M3	DrugBank
MOL000908	beta-elemene	Muscarinic acetylcholine receptor M1	DrugBank
MOL000908	beta-elemene	Alpha-1A adrenergic receptor	DrugBank
MOL000908	beta-elemene	Neuronal acetylcholine receptor protein, alpha-7 chain	DrugBank
MOL000908	beta-elemene	Nuclear receptor coactivator 2	DrugBank
MOL000908	beta-elemene	Gamma-aminobutyric-acid receptor alpha-5 subunit	DrugBank
MOL000908	beta-elemene	Apoptosis regulator Bcl-2	DrugBank	validated
MOL000908	beta-elemene	Cyclin-dependent kinase inhibitor 1	N/A	validated
MOL000908	beta-elemene	Eukaryotic translation initiation factor 6	N/A	validated
MOL000908	beta-elemene	Retinoblastoma-associated protein	DrugBank	validated
MOL000908	beta-elemene	Cellular tumor antigen p53	DrugBank	validated
MOL000908	beta-elemene	Telomerase protein component 1	N/A	validated
MOL000908	beta-elemene	Protein CBFA2T1	N/A	validated
MOL000908	beta-elemene	Cell division control protein 2 homolog	DrugBank	validated
MOL000908	beta-elemene	G2/mitotic-specific cyclin-B1	N/A	validated
MOL000908	beta-elemene	Transforming protein RhoA	N/A	validated
MOL000924	Mnk	Alcohol dehydrogenase 1C	DrugBank
MOL000924	Mnk	Ig gamma-1 chain C region	DrugBank
MOL000971	Ethylpalmitate	Nuclear receptor coactivator 2	DrugBank
