# Supplementary material for: Network Pharmacology and Molecular Docking Combined to Analyze the Molecular and Pharmacological Mechanism of Pinellia ternata in the Treatment of Hypertension
Source: Curr Issues Mol Biol. 2021 May 1;43(1):6. doi: 10.3390/cimb43010006 (PMC8929114; doi:10.3390/cimb43010006)
Supplement: Supplementary file 1 [file cimb-43-00006-s001.zip › Supplementary Table 2.xls]

## Sheet: Sheet1
List of compounds and corresponding targets
Compound	Target
baicalein	AKT1
baicalein	FOS
baicalein	VEGFA
baicalein	TP53
beta-sitosterol	JUN
coniferin	ESR1
baicalein	MMP9
baicalein	CASP3
beta-sitosterol	CASP3
baicalein	AR
coniferin	AR
(3S,6S)-3-(benzyl)-6-(4-hydroxybenzyl)piperazine-2,5-quinone	AR
cavidine	PTGS2
baicalein	PTGS2
beta-sitosterol	PTGS2
stigmasterol	PTGS2
coniferin	PTGS2
(3S,6S)-3-(benzyl)-6-(4-hydroxybenzyl)piperazine-2,5-quinone	PTGS2
beta-D-Ribofuranoside, xanthine-9	PTGS2
