# Supplementary material for: Network Pharmacology and Molecular Docking Combined to Analyze the Molecular and Pharmacological Mechanism of Pinellia ternata in the Treatment of Hypertension
Source: Curr Issues Mol Biol. 2021 May 1;43(1):6. doi: 10.3390/cimb43010006 (PMC8929114; doi:10.3390/cimb43010006)
Supplement: Supplementary file 1 [file cimb-43-00006-s001.zip › Supplementary Table 3.xls]

## Sheet: Sheet1
Parameters:
Network Scoring:
Include Loops: false Degree Cutoff: 2
Cluster Finding:
Node Score Cutoff: 0.2 Haircut: true Fluff: false K-Core: 3 Max. Depth from Seed: 100
Cluster	Score	Nodes	Edges	Node IDs
1	17.9	21	179	TGFB1, MMP9, TP53, HIF1A, PGR, CASP8, CYCS, JUN, CASP3, CASP9, FOS, ESR1, PPARG, VEGFA, AR, CCNA2, PTGS2, AKT1, CDK2, CCNB1, RELA
2	8.667	16	65	MAOB, MAOA, HTR2A, CHRM5, ADRA1D, ADRA1B, PRKACA, NFATC1, CHRM1, HTR2C, SLC6A3, PRKCA, SLC6A4, CHRM3, SLC6A2, ADRA1A
3	5.143	8	18	CHRM4, OPRD1, CHRM2, ADRA2C, ADRB1, HTR3A, ADRB2, OPRM1
