# Supplementary material for: Network Pharmacology and Molecular Docking Combined to Analyze the Molecular and Pharmacological Mechanism of Pinellia ternata in the Treatment of Hypertension
Source: Curr Issues Mol Biol. 2021 May 1;43(1):6. doi: 10.3390/cimb43010006 (PMC8929114; doi:10.3390/cimb43010006)
Supplement: Supplementary file 1 [file cimb-43-00006-s001.zip › Supplementary Table 4.xls]

## Sheet: Module1-BP
Biological Process
GO-ID	p-value	corr p-value	x	n	X	N	Description	Genes in test set
62197	5.1114e-19	1.3515e-15	13	283	21	17956	cellular response to chemical stress	JUN|FOS|PTGS2|MMP9|HIF1A|RELA|CCNA2|CASP3|CDK2|CYCS|AKT1|PPARG|TP53
70887	1.8872e-17	2.4949e-14	21	2878	21	17956	cellular response to chemical stimulus	JUN|TGFB1|FOS|PTGS2|MMP9|HIF1A|ESR1|RELA|VEGFA|CASP9|CCNA2|AR|CCNB1|CASP8|CASP3|CDK2|CYCS|AKT1|PGR|PPARG|TP53
1901700	7.7534e-17	6.8333e-14	18	1563	21	17956	response to oxygen-containing compound	JUN|TGFB1|FOS|PTGS2|MMP9|HIF1A|ESR1|RELA|CASP9|CCNA2|AR|CCNB1|CASP8|CASP3|CDK2|AKT1|PPARG|TP53
51173	1.38e-16	9.1215e-14	21	3163	21	17956	positive regulation of nitrogen compound metabolic process	JUN|TGFB1|FOS|PTGS2|MMP9|HIF1A|ESR1|RELA|VEGFA|CASP9|CCNA2|AR|CCNB1|CASP8|CASP3|CDK2|CYCS|AKT1|PGR|PPARG|TP53
33993	2.9586e-16	1.5645e-13	15	821	21	17956	response to lipid	JUN|TGFB1|FOS|PTGS2|ESR1|RELA|CASP9|CCNA2|AR|CCNB1|CASP8|CASP3|AKT1|PGR|PPARG
31325	4.4841e-16	1.976e-13	21	3345	21	17956	positive regulation of cellular metabolic process	JUN|TGFB1|FOS|PTGS2|MMP9|HIF1A|ESR1|RELA|VEGFA|CASP9|CCNA2|AR|CCNB1|CASP8|CASP3|CDK2|CYCS|AKT1|PGR|PPARG|TP53
14070	6.9973e-16	2.643e-13	15	870	21	17956	response to organic cyclic compound	JUN|TGFB1|FOS|PTGS2|ESR1|RELA|CASP9|CCNA2|AR|CCNB1|CASP8|CASP3|AKT1|PGR|PPARG
10604	1.2738e-15	4.21e-13	21	3515	21	17956	positive regulation of macromolecule metabolic process	JUN|TGFB1|FOS|PTGS2|MMP9|HIF1A|ESR1|RELA|VEGFA|CASP9|CCNA2|AR|CCNB1|CASP8|CASP3|CDK2|CYCS|AKT1|PGR|PPARG|TP53
10035	1.8309e-15	4.9752e-13	13	530	21	17956	response to inorganic substance	JUN|FOS|PTGS2|MMP9|HIF1A|RELA|CASP9|CCNA2|CCNB1|CASP8|CASP3|CDK2|AKT1
71310	1.8817e-15	4.9752e-13	19	2314	21	17956	cellular response to organic substance	JUN|TGFB1|FOS|PTGS2|MMP9|HIF1A|ESR1|RELA|VEGFA|CASP9|CCNA2|AR|CCNB1|CASP8|CASP3|AKT1|PGR|PPARG|TP53
6979	2.4421e-15	5.87e-13	12	392	21	17956	response to oxidative stress	CCNA2|JUN|CASP3|CDK2|CYCS|AKT1|FOS|PTGS2|MMP9|HIF1A|TP53|RELA
9893	6.578e-15	1.4493e-12	21	3800	21	17956	positive regulation of metabolic process	JUN|TGFB1|FOS|PTGS2|MMP9|HIF1A|ESR1|RELA|VEGFA|CASP9|CCNA2|AR|CCNB1|CASP8|CASP3|CDK2|CYCS|AKT1|PGR|PPARG|TP53
42127	8.0651e-15	1.6403e-12	17	1637	21	17956	regulation of cell population proliferation	JUN|TGFB1|PTGS2|MMP9|HIF1A|ESR1|RELA|VEGFA|CCNA2|AR|CCNB1|CASP3|CDK2|AKT1|PGR|PPARG|TP53
1901701	1.1958e-14	2.2584e-12	15	1054	21	17956	cellular response to oxygen-containing compound	JUN|TGFB1|FOS|PTGS2|MMP9|ESR1|RELA|CASP9|CCNA2|AR|CCNB1|CDK2|AKT1|PPARG|TP53
1902895	1.4671e-14	2.586e-12	7	39	21	17956	positive regulation of pri-miRNA transcription by RNA polymerase II	JUN|TGFB1|PPARG|FOS|HIF1A|TP53|RELA
71407	3.5974e-14	5.9447e-12	12	491	21	17956	cellular response to organic cyclic compound	CASP9|CCNA2|AR|CCNB1|TGFB1|CASP8|CASP3|AKT1|PGR|PPARG|PTGS2|ESR1
9628	3.847e-14	5.9832e-12	15	1141	21	17956	response to abiotic stimulus	JUN|FOS|PTGS2|MMP9|HIF1A|RELA|VEGFA|CASP9|CCNA2|CCNB1|CASP8|CASP3|AKT1|PPARG|TP53
34599	4.4853e-14	6.5884e-12	10	239	21	17956	cellular response to oxidative stress	CCNA2|JUN|CDK2|CYCS|AKT1|FOS|MMP9|HIF1A|TP53|RELA
1902893	9.4561e-14	1.3159e-11	7	50	21	17956	regulation of pri-miRNA transcription by RNA polymerase II	JUN|TGFB1|PPARG|FOS|HIF1A|TP53|RELA
42221	1.0427e-13	1.3785e-11	21	4333	21	17956	response to chemical	JUN|TGFB1|FOS|PTGS2|MMP9|HIF1A|ESR1|RELA|VEGFA|CASP9|CCNA2|AR|CCNB1|CASP8|CASP3|CDK2|CYCS|AKT1|PGR|PPARG|TP53
10033	1.8761e-13	2.3621e-11	19	2958	21	17956	response to organic substance	JUN|TGFB1|FOS|PTGS2|MMP9|HIF1A|ESR1|RELA|VEGFA|CASP9|CCNA2|AR|CCNB1|CASP8|CASP3|AKT1|PGR|PPARG|TP53
65009	2.8333e-13	3.4051e-11	19	3024	21	17956	regulation of molecular function	JUN|TGFB1|FOS|PTGS2|MMP9|HIF1A|ESR1|RELA|VEGFA|CASP9|CCNA2|AR|CCNB1|CASP8|CASP3|CYCS|AKT1|PPARG|TP53
302	4.1756e-13	4.8001e-11	9	193	21	17956	response to reactive oxygen species	CCNA2|JUN|CASP3|CDK2|AKT1|FOS|MMP9|HIF1A|RELA
33554	4.9185e-13	5.4185e-11	16	1698	21	17956	cellular response to stress	JUN|FOS|PTGS2|MMP9|HIF1A|RELA|VEGFA|CASP9|CCNA2|CCNB1|CASP3|CDK2|CYCS|AKT1|PPARG|TP53
9888	7.0056e-13	7.4091e-11	16	1737	21	17956	tissue development	JUN|TGFB1|FOS|PTGS2|MMP9|HIF1A|ESR1|RELA|VEGFA|AR|CCNB1|CASP3|AKT1|PGR|PPARG|TP53
48513	7.4595e-13	7.5857e-11	19	3185	21	17956	animal organ development	JUN|TGFB1|FOS|PTGS2|MMP9|HIF1A|ESR1|RELA|VEGFA|CASP9|CCNA2|AR|CCNB1|CASP8|CASP3|AKT1|PGR|PPARG|TP53
71495	1.0841e-12	1.0616e-10	14	1130	21	17956	cellular response to endogenous stimulus	JUN|TGFB1|FOS|PTGS2|ESR1|RELA|CASP9|CCNA2|AR|CASP3|AKT1|PGR|PPARG|TP53
8284	2.3919e-12	2.2586e-10	13	928	21	17956	positive regulation of cell population proliferation	JUN|TGFB1|PTGS2|MMP9|HIF1A|ESR1|RELA|VEGFA|CCNA2|AR|CCNB1|CDK2|AKT1
10038	2.8388e-12	2.5882e-10	10	362	21	17956	response to metal ion	CASP9|JUN|CCNB1|CASP8|CASP3|AKT1|FOS|PTGS2|MMP9|HIF1A
10941	6.178e-12	5.4449e-10	15	1615	21	17956	regulation of cell death	JUN|FOS|PTGS2|MMP9|HIF1A|ESR1|RELA|VEGFA|CASP9|AR|CASP8|CASP3|AKT1|PPARG|TP53
51247	1.0854e-11	9.2575e-10	15	1679	21	17956	positive regulation of protein metabolic process	JUN|TGFB1|PTGS2|MMP9|RELA|VEGFA|CASP9|AR|CCNB1|CASP8|CASP3|CYCS|AKT1|PPARG|TP53
9725	1.1789e-11	9.7407e-10	12	802	21	17956	response to hormone	CASP9|CCNA2|AR|TGFB1|CASP3|AKT1|PGR|PPARG|FOS|PTGS2|ESR1|RELA
48545	1.2355e-11	9.8988e-10	9	281	21	17956	response to steroid hormone	CASP9|AR|TGFB1|CASP3|PGR|FOS|PTGS2|ESR1|RELA
48608	1.2947e-11	9.9008e-10	10	422	21	17956	reproductive structure development	AR|CASP8|CASP3|AKT1|PGR|PPARG|PTGS2|HIF1A|ESR1|VEGFA
51254	1.3106e-11	9.9008e-10	15	1701	21	17956	positive regulation of RNA metabolic process	JUN|TGFB1|FOS|HIF1A|ESR1|RELA|VEGFA|CCNA2|AR|CCNB1|CDK2|AKT1|PGR|PPARG|TP53
61458	1.4211e-11	1.0437e-09	10	426	21	17956	reproductive system development	AR|CASP8|CASP3|AKT1|PGR|PPARG|PTGS2|HIF1A|ESR1|VEGFA
9719	1.915e-11	1.3685e-09	14	1396	21	17956	response to endogenous stimulus	JUN|TGFB1|FOS|PTGS2|ESR1|RELA|CASP9|CCNA2|AR|CASP3|AKT1|PGR|PPARG|TP53
9314	2.044e-11	1.3857e-09	10	442	21	17956	response to radiation	CASP9|JUN|CASP3|AKT1|FOS|PTGS2|MMP9|HIF1A|TP53|RELA
32268	2.044e-11	1.3857e-09	17	2627	21	17956	regulation of cellular protein metabolic process	JUN|TGFB1|PTGS2|MMP9|HIF1A|RELA|VEGFA|CASP9|CCNA2|AR|CCNB1|CASP8|CASP3|CYCS|AKT1|PPARG|TP53
48522	2.4825e-11	1.641e-09	21	5620	21	17956	positive regulation of cellular process	JUN|TGFB1|FOS|PTGS2|MMP9|HIF1A|ESR1|RELA|VEGFA|CASP9|CCNA2|AR|CCNB1|CASP8|CASP3|CDK2|CYCS|AKT1|PGR|PPARG|TP53
9416	3.0609e-11	1.8612e-09	9	311	21	17956	response to light stimulus	CASP9|CASP3|AKT1|FOS|PTGS2|MMP9|HIF1A|TP53|RELA
44093	3.0662e-11	1.8612e-09	15	1804	21	17956	positive regulation of molecular function	JUN|TGFB1|MMP9|HIF1A|ESR1|RELA|VEGFA|CASP9|AR|CCNB1|CASP8|CASP3|CYCS|AKT1|PPARG
22414	3.0804e-11	1.8612e-09	14	1446	21	17956	reproductive process	FOS|PTGS2|MMP9|HIF1A|ESR1|VEGFA|AR|CCNB1|CASP8|CASP3|CDK2|AKT1|PGR|PPARG
48646	3.1319e-11	1.8612e-09	12	872	21	17956	anatomical structure formation involved in morphogenesis	CASP9|AR|JUN|TGFB1|CASP8|CASP3|AKT1|PTGS2|MMP9|HIF1A|TP53|VEGFA
3	3.1677e-11	1.8612e-09	14	1449	21	17956	reproduction	FOS|PTGS2|MMP9|HIF1A|ESR1|VEGFA|AR|CCNB1|CASP8|CASP3|CDK2|AKT1|PGR|PPARG
32496	3.2412e-11	1.863e-09	9	313	21	17956	response to lipopolysaccharide	CASP9|JUN|TGFB1|CASP8|CASP3|AKT1|FOS|PTGS2|RELA
42981	3.5406e-11	1.9918e-09	14	1461	21	17956	regulation of apoptotic process	JUN|PTGS2|MMP9|HIF1A|ESR1|RELA|VEGFA|CASP9|AR|CASP8|CASP3|AKT1|PPARG|TP53
10628	4.01e-11	2.2088e-09	16	2256	21	17956	positive regulation of gene expression	JUN|TGFB1|FOS|PTGS2|HIF1A|ESR1|RELA|VEGFA|CCNA2|AR|CASP8|CDK2|AKT1|PGR|PPARG|TP53
43067	4.3311e-11	2.337e-09	14	1483	21	17956	regulation of programmed cell death	JUN|PTGS2|MMP9|HIF1A|ESR1|RELA|VEGFA|CASP9|AR|CASP8|CASP3|AKT1|PPARG|TP53
51246	4.5656e-11	2.4143e-09	17	2759	21	17956	regulation of protein metabolic process	JUN|TGFB1|PTGS2|MMP9|HIF1A|RELA|VEGFA|CASP9|CCNA2|AR|CCNB1|CASP8|CASP3|CYCS|AKT1|PPARG|TP53
9612	4.8747e-11	2.5068e-09	8	207	21	17956	response to mechanical stimulus	JUN|CCNB1|CASP8|AKT1|PPARG|FOS|PTGS2|RELA
43281	5.0664e-11	2.5068e-09	8	208	21	17956	regulation of cysteine-type endopeptidase activity involved in apoptotic process	CASP9|CASP8|CYCS|AKT1|PPARG|PTGS2|MMP9|VEGFA
2237	5.1945e-11	2.5068e-09	9	330	21	17956	response to molecule of bacterial origin	CASP9|JUN|TGFB1|CASP8|CASP3|AKT1|FOS|PTGS2|RELA
51171	5.294e-11	2.5068e-09	21	5826	21	17956	regulation of nitrogen compound metabolic process	JUN|TGFB1|FOS|PTGS2|MMP9|HIF1A|ESR1|RELA|VEGFA|CASP9|CCNA2|AR|CCNB1|CASP8|CASP3|CDK2|CYCS|AKT1|PGR|PPARG|TP53
71396	5.3034e-11	2.5068e-09	10	487	21	17956	cellular response to lipid	CASP9|CCNA2|AR|CCNB1|TGFB1|AKT1|PGR|PPARG|ESR1|RELA
45935	5.3093e-11	2.5068e-09	15	1874	21	17956	positive regulation of nucleobase-containing compound metabolic process	JUN|TGFB1|FOS|HIF1A|ESR1|RELA|VEGFA|CCNA2|AR|CCNB1|CDK2|AKT1|PGR|PPARG|TP53
71453	5.6814e-11	2.6354e-09	8	211	21	17956	cellular response to oxygen levels	CCNA2|CCNB1|AKT1|PPARG|PTGS2|HIF1A|TP53|VEGFA
45893	6.1984e-11	2.8256e-09	14	1523	21	17956	positive regulation of transcription, DNA-templated	JUN|TGFB1|FOS|HIF1A|ESR1|RELA|VEGFA|CCNA2|AR|CDK2|AKT1|PGR|PPARG|TP53
71241	7.109e-11	3.1858e-09	8	217	21	17956	cellular response to inorganic substance	CCNA2|JUN|CCNB1|CDK2|AKT1|FOS|PTGS2|MMP9
50790	7.6575e-11	3.3744e-09	16	2353	21	17956	regulation of catalytic activity	JUN|TGFB1|PTGS2|MMP9|HIF1A|ESR1|VEGFA|CASP9|CCNA2|CCNB1|CASP8|CASP3|CYCS|AKT1|PPARG|TP53
34614	8.0249e-11	3.4783e-09	7	127	21	17956	cellular response to reactive oxygen species	CCNA2|JUN|CDK2|AKT1|FOS|MMP9|RELA
31328	8.5455e-11	3.6442e-09	15	1937	21	17956	positive regulation of cellular biosynthetic process	JUN|TGFB1|FOS|PTGS2|HIF1A|ESR1|RELA|VEGFA|CCNA2|AR|CDK2|AKT1|PGR|PPARG|TP53
80090	1.0218e-10	4.2827e-09	21	6011	21	17956	regulation of primary metabolic process	JUN|TGFB1|FOS|PTGS2|MMP9|HIF1A|ESR1|RELA|VEGFA|CASP9|CCNA2|AR|CCNB1|CASP8|CASP3|CDK2|CYCS|AKT1|PGR|PPARG|TP53
51094	1.0514e-10	4.2827e-09	13	1253	21	17956	positive regulation of developmental process	JUN|TGFB1|FOS|PTGS2|HIF1A|RELA|VEGFA|AR|CCNB1|CASP8|AKT1|PPARG|TP53
9891	1.0658e-10	4.2827e-09	15	1967	21	17956	positive regulation of biosynthetic process	JUN|TGFB1|FOS|PTGS2|HIF1A|ESR1|RELA|VEGFA|CCNA2|AR|CDK2|AKT1|PGR|PPARG|TP53
30154	1.0691e-10	4.2827e-09	18	3485	21	17956	cell differentiation	JUN|TGFB1|FOS|PTGS2|MMP9|HIF1A|ESR1|RELA|VEGFA|CASP9|AR|CCNB1|CASP8|CASP3|AKT1|PGR|PPARG|TP53
10632	1.0925e-10	4.3114e-09	8	229	21	17956	regulation of epithelial cell migration	JUN|TGFB1|AKT1|PPARG|PTGS2|MMP9|HIF1A|VEGFA
6508	1.2081e-10	4.6443e-09	13	1267	21	17956	proteolysis	TGFB1|MMP9|HIF1A|ESR1|RELA|CASP9|CCNA2|AR|CCNB1|CASP8|CASP3|CDK2|TP53
2000116	1.212e-10	4.6443e-09	8	232	21	17956	regulation of cysteine-type endopeptidase activity	CASP9|CASP8|CYCS|AKT1|PPARG|PTGS2|MMP9|VEGFA
1903508	1.2754e-10	4.7894e-09	14	1607	21	17956	positive regulation of nucleic acid-templated transcription	JUN|TGFB1|FOS|HIF1A|ESR1|RELA|VEGFA|CCNA2|AR|CDK2|AKT1|PGR|PPARG|TP53
1902680	1.2861e-10	4.7894e-09	14	1608	21	17956	positive regulation of RNA biosynthetic process	JUN|TGFB1|FOS|HIF1A|ESR1|RELA|VEGFA|CCNA2|AR|CDK2|AKT1|PGR|PPARG|TP53
48869	1.4099e-10	5.1776e-09	18	3541	21	17956	cellular developmental process	JUN|TGFB1|FOS|PTGS2|MMP9|HIF1A|ESR1|RELA|VEGFA|CASP9|AR|CCNB1|CASP8|CASP3|AKT1|PGR|PPARG|TP53
7165	1.5163e-10	5.4675e-09	20	5064	21	17956	signal transduction	JUN|TGFB1|FOS|PTGS2|MMP9|HIF1A|ESR1|RELA|VEGFA|CASP9|CCNA2|AR|CCNB1|CASP8|CASP3|CDK2|AKT1|PGR|PPARG|TP53
48731	1.5302e-10	5.4675e-09	19	4243	21	17956	system development	JUN|TGFB1|FOS|PTGS2|MMP9|HIF1A|ESR1|RELA|VEGFA|CASP9|CCNA2|AR|CCNB1|CASP8|CASP3|AKT1|PGR|PPARG|TP53
70482	1.6182e-10	5.7047e-09	9	375	21	17956	response to oxygen levels	CCNA2|CCNB1|CASP3|AKT1|PPARG|PTGS2|HIF1A|TP53|VEGFA
32355	1.6809e-10	5.8264e-09	7	141	21	17956	response to estradiol	CASP9|CCNA2|TGFB1|CASP8|CASP3|PTGS2|ESR1
6950	1.6968e-10	5.8264e-09	18	3579	21	17956	response to stress	JUN|TGFB1|FOS|PTGS2|MMP9|HIF1A|RELA|VEGFA|CASP9|CCNA2|CCNB1|CASP8|CASP3|CDK2|CYCS|AKT1|PPARG|TP53
48518	2.0341e-10	6.8951e-09	21	6211	21	17956	positive regulation of biological process	JUN|TGFB1|FOS|PTGS2|MMP9|HIF1A|ESR1|RELA|VEGFA|CASP9|CCNA2|AR|CCNB1|CASP8|CASP3|CDK2|CYCS|AKT1|PGR|PPARG|TP53
31323	2.14e-10	7.1031e-09	21	6226	21	17956	regulation of cellular metabolic process	JUN|TGFB1|FOS|PTGS2|MMP9|HIF1A|ESR1|RELA|VEGFA|CASP9|CCNA2|AR|CCNB1|CASP8|CASP3|CDK2|CYCS|AKT1|PGR|PPARG|TP53
9411	2.1492e-10	7.1031e-09	7	146	21	17956	response to UV	CASP9|CASP3|AKT1|PTGS2|MMP9|TP53|RELA
30097	2.3496e-10	7.6695e-09	10	567	21	17956	hemopoiesis	CASP9|JUN|TGFB1|CASP8|CASP3|PPARG|MMP9|HIF1A|TP53|VEGFA
10634	2.4803e-10	7.9976e-09	7	149	21	17956	positive regulation of epithelial cell migration	JUN|TGFB1|AKT1|PTGS2|MMP9|HIF1A|VEGFA
48732	3.0619e-10	9.7538e-09	9	403	21	17956	gland development	AR|JUN|TGFB1|AKT1|PGR|HIF1A|ESR1|RELA|VEGFA
48145	3.3246e-10	1.0465e-08	6	80	21	17956	regulation of fibroblast proliferation	CCNA2|JUN|CCNB1|PPARG|ESR1|TP53
9653	3.6644e-10	1.1398e-08	15	2144	21	17956	anatomical structure morphogenesis	JUN|TGFB1|PTGS2|MMP9|HIF1A|ESR1|RELA|VEGFA|CASP9|AR|CASP8|CASP3|AKT1|PGR|TP53
45597	3.9091e-10	1.2018e-08	11	820	21	17956	positive regulation of cell differentiation	AR|JUN|TGFB1|CASP8|AKT1|PPARG|FOS|PTGS2|HIF1A|RELA|VEGFA
34097	3.9896e-10	1.2125e-08	12	1086	21	17956	response to cytokine	JUN|TGFB1|CASP8|CASP3|AKT1|FOS|PTGS2|MMP9|HIF1A|TP53|RELA|VEGFA
60255	4.1071e-10	1.234e-08	21	6422	21	17956	regulation of macromolecule metabolic process	JUN|TGFB1|FOS|PTGS2|MMP9|HIF1A|ESR1|RELA|VEGFA|CASP9|CCNA2|AR|CCNB1|CASP8|CASP3|CDK2|CYCS|AKT1|PGR|PPARG|TP53
60429	4.8724e-10	1.4475e-08	12	1105	21	17956	epithelium development	AR|JUN|TGFB1|CASP3|AKT1|PGR|PPARG|HIF1A|ESR1|TP53|RELA|VEGFA
48534	5.2668e-10	1.5431e-08	10	616	21	17956	hematopoietic or lymphoid organ development	CASP9|JUN|TGFB1|CASP8|CASP3|PPARG|MMP9|HIF1A|TP53|VEGFA
35295	5.3111e-10	1.5431e-08	11	844	21	17956	tube development	AR|JUN|CCNB1|TGFB1|CASP8|AKT1|PGR|PTGS2|HIF1A|ESR1|VEGFA
23052	5.7626e-10	1.6561e-08	20	5420	21	17956	signaling	JUN|TGFB1|FOS|PTGS2|MMP9|HIF1A|ESR1|RELA|VEGFA|CASP9|CCNA2|AR|CCNB1|CASP8|CASP3|CDK2|AKT1|PGR|PPARG|TP53
72359	6.1696e-10	1.754e-08	11	856	21	17956	circulatory system development	JUN|CCNB1|TGFB1|CASP8|CASP3|AKT1|PPARG|PTGS2|HIF1A|TP53|VEGFA
43535	7.3165e-10	2.058e-08	6	91	21	17956	regulation of blood vessel endothelial cell migration	TGFB1|AKT1|PPARG|PTGS2|HIF1A|VEGFA
10557	7.407e-10	2.0615e-08	14	1833	21	17956	positive regulation of macromolecule biosynthetic process	JUN|TGFB1|FOS|HIF1A|ESR1|RELA|VEGFA|CCNA2|AR|CDK2|AKT1|PGR|PPARG|TP53
7565	7.6748e-10	2.1102e-08	7	175	21	17956	female pregnancy	AR|AKT1|PGR|FOS|PTGS2|MMP9|ESR1
7154	7.8209e-10	2.1102e-08	20	5505	21	17956	cell communication	JUN|TGFB1|FOS|PTGS2|MMP9|HIF1A|ESR1|RELA|VEGFA|CASP9|CCNA2|AR|CCNB1|CASP8|CASP3|CDK2|AKT1|PGR|PPARG|TP53
1901216	7.8213e-10	2.1102e-08	6	92	21	17956	positive regulation of neuron death	CASP9|JUN|CASP8|CASP3|FOS|TP53
2520	9.1414e-10	2.4289e-08	10	652	21	17956	immune system development	CASP9|JUN|TGFB1|CASP8|CASP3|PPARG|MMP9|HIF1A|TP53|VEGFA
43066	9.2123e-10	2.4289e-08	11	889	21	17956	negative regulation of apoptotic process	AR|JUN|CASP8|CASP3|AKT1|PTGS2|MMP9|HIF1A|TP53|RELA|VEGFA
35239	9.2782e-10	2.4289e-08	10	653	21	17956	tube morphogenesis	AR|JUN|TGFB1|CASP8|AKT1|PGR|PTGS2|HIF1A|ESR1|VEGFA
51716	1.0109e-09	2.6204e-08	21	6703	21	17956	cellular response to stimulus	JUN|TGFB1|FOS|PTGS2|MMP9|HIF1A|ESR1|RELA|VEGFA|CASP9|CCNA2|AR|CCNB1|CASP8|CASP3|CDK2|CYCS|AKT1|PGR|PPARG|TP53
71456	1.1321e-09	2.8955e-08	7	185	21	17956	cellular response to hypoxia	CCNA2|CCNB1|AKT1|PTGS2|HIF1A|TP53|VEGFA
43069	1.1389e-09	2.8955e-08	11	907	21	17956	negative regulation of programmed cell death	AR|JUN|CASP8|CASP3|AKT1|PTGS2|MMP9|HIF1A|TP53|RELA|VEGFA
19221	1.1902e-09	2.9969e-08	10	670	21	17956	cytokine-mediated signaling pathway	TGFB1|CASP3|AKT1|FOS|PTGS2|MMP9|HIF1A|TP53|RELA|VEGFA
45944	1.21e-09	3.0181e-08	12	1196	21	17956	positive regulation of transcription by RNA polymerase II	AR|JUN|TGFB1|AKT1|PGR|PPARG|FOS|HIF1A|ESR1|TP53|RELA|VEGFA
1901214	1.2386e-09	3.0605e-08	8	311	21	17956	regulation of neuron death	CASP9|JUN|CASP8|CASP3|AKT1|FOS|HIF1A|TP53
10605	1.3962e-09	3.418e-08	16	2846	21	17956	negative regulation of macromolecule metabolic process	JUN|TGFB1|PTGS2|MMP9|HIF1A|ESR1|RELA|VEGFA|AR|CCNB1|CASP3|CDK2|AKT1|PGR|PPARG|TP53
45595	1.4576e-09	3.5356e-08	13	1548	21	17956	regulation of cell differentiation	JUN|TGFB1|FOS|PTGS2|MMP9|HIF1A|RELA|VEGFA|AR|CASP8|AKT1|PPARG|TP53
36294	1.5775e-09	3.7917e-08	7	194	21	17956	cellular response to decreased oxygen levels	CCNA2|CCNB1|AKT1|PTGS2|HIF1A|TP53|VEGFA
71363	1.5943e-09	3.7975e-08	9	486	21	17956	cellular response to growth factor stimulus	CCNA2|JUN|TGFB1|CASP3|AKT1|FOS|TP53|RELA|VEGFA
7275	1.7068e-09	4.0292e-08	19	4837	21	17956	multicellular organism development	JUN|TGFB1|FOS|PTGS2|MMP9|HIF1A|ESR1|RELA|VEGFA|CASP9|CCNA2|AR|CCNB1|CASP8|CASP3|AKT1|PGR|PPARG|TP53
1901654	1.8188e-09	4.2557e-08	7	198	21	17956	response to ketone	CASP9|AR|TGFB1|AKT1|PPARG|FOS|RELA
19222	2.1443e-09	4.9732e-08	21	6947	21	17956	regulation of metabolic process	JUN|TGFB1|FOS|PTGS2|MMP9|HIF1A|ESR1|RELA|VEGFA|CASP9|CCNA2|AR|CCNB1|CASP8|CASP3|CDK2|CYCS|AKT1|PGR|PPARG|TP53
50793	2.1914e-09	5.0382e-08	15	2431	21	17956	regulation of developmental process	JUN|TGFB1|FOS|PTGS2|MMP9|HIF1A|ESR1|RELA|VEGFA|AR|CCNB1|CASP8|AKT1|PPARG|TP53
32270	2.2255e-09	5.0727e-08	13	1602	21	17956	positive regulation of cellular protein metabolic process	JUN|TGFB1|PTGS2|MMP9|VEGFA|CASP9|AR|CCNB1|CASP8|CYCS|AKT1|PPARG|TP53
1666	2.3311e-09	5.242e-08	8	337	21	17956	response to hypoxia	CCNA2|CCNB1|CASP3|AKT1|PTGS2|HIF1A|TP53|VEGFA
34654	2.3395e-09	5.242e-08	11	971	21	17956	nucleobase-containing compound biosynthetic process	AR|JUN|CCNB1|TGFB1|PGR|PPARG|FOS|PTGS2|ESR1|TP53|RELA
3006	2.443e-09	5.4281e-08	11	975	21	17956	developmental process involved in reproduction	AR|CCNB1|CASP8|CASP3|AKT1|PGR|PPARG|PTGS2|HIF1A|ESR1|VEGFA
44706	2.479e-09	5.4621e-08	7	207	21	17956	multi-multicellular organism process	AR|AKT1|PGR|FOS|PTGS2|MMP9|ESR1
50678	2.6173e-09	5.7191e-08	8	342	21	17956	regulation of epithelial cell proliferation	AR|JUN|TGFB1|AKT1|PGR|PPARG|HIF1A|VEGFA
70848	2.6496e-09	5.7422e-08	9	515	21	17956	response to growth factor	CCNA2|JUN|TGFB1|CASP3|AKT1|FOS|TP53|RELA|VEGFA
7507	2.695e-09	5.7931e-08	9	516	21	17956	heart development	JUN|CCNB1|TGFB1|CASP8|CASP3|PPARG|HIF1A|TP53|VEGFA
32870	2.9323e-09	6.2523e-08	9	521	21	17956	cellular response to hormone stimulus	CASP9|CCNA2|AR|AKT1|PGR|PPARG|FOS|ESR1|RELA
60548	3.0575e-09	6.4399e-08	11	996	21	17956	negative regulation of cell death	AR|JUN|CASP8|CASP3|AKT1|PTGS2|MMP9|HIF1A|TP53|RELA|VEGFA
36293	3.0689e-09	6.4399e-08	8	349	21	17956	response to decreased oxygen levels	CCNA2|CCNB1|CASP3|AKT1|PTGS2|HIF1A|TP53|VEGFA
2001233	3.3562e-09	6.9872e-08	8	353	21	17956	regulation of apoptotic signaling pathway	AR|CASP8|AKT1|PTGS2|MMP9|HIF1A|TP53|RELA
2000026	3.3976e-09	7.0182e-08	12	1309	21	17956	regulation of multicellular organismal development	JUN|CCNB1|TGFB1|CASP8|AKT1|PPARG|FOS|MMP9|HIF1A|TP53|RELA|VEGFA
10467	3.4843e-09	7.1414e-08	14	2060	21	17956	gene expression	JUN|FOS|PTGS2|HIF1A|ESR1|RELA|AR|CCNB1|CASP8|CASP3|AKT1|PGR|PPARG|TP53
6351	3.5783e-09	7.2778e-08	9	533	21	17956	transcription, DNA-templated	AR|JUN|CCNB1|PGR|PPARG|FOS|ESR1|TP53|RELA
97659	3.6374e-09	7.3415e-08	9	534	21	17956	nucleic acid-templated transcription	AR|JUN|CCNB1|PGR|PPARG|FOS|ESR1|TP53|RELA
30099	3.9075e-09	7.8269e-08	7	221	21	17956	myeloid cell differentiation	CASP9|JUN|CASP8|CASP3|PPARG|MMP9|VEGFA
43536	3.9914e-09	7.9348e-08	5	54	21	17956	positive regulation of blood vessel endothelial cell migration	TGFB1|AKT1|PTGS2|HIF1A|VEGFA
60749	4.185e-09	8.1964e-08	4	18	21	17956	mammary gland alveolus development	AR|HIF1A|ESR1|VEGFA
61377	4.185e-09	8.1964e-08	4	18	21	17956	mammary gland lobule development	AR|HIF1A|ESR1|VEGFA
32774	4.3466e-09	8.4502e-08	9	545	21	17956	RNA biosynthetic process	AR|JUN|CCNB1|PGR|PPARG|FOS|ESR1|TP53|RELA
30879	4.5582e-09	8.7971e-08	6	123	21	17956	mammary gland development	AR|AKT1|PGR|HIF1A|ESR1|VEGFA
9892	4.6808e-09	8.9682e-08	16	3083	21	17956	negative regulation of metabolic process	JUN|TGFB1|PTGS2|MMP9|HIF1A|ESR1|RELA|VEGFA|AR|CCNB1|CASP3|CDK2|AKT1|PGR|PPARG|TP53
61180	4.8138e-09	9.1567e-08	5	56	21	17956	mammary gland epithelium development	AR|AKT1|PGR|HIF1A|ESR1
18130	4.8644e-09	9.1867e-08	11	1041	21	17956	heterocycle biosynthetic process	AR|JUN|CCNB1|TGFB1|PGR|PPARG|FOS|PTGS2|ESR1|TP53|RELA
2001234	5.0013e-09	9.3783e-08	7	229	21	17956	negative regulation of apoptotic signaling pathway	AR|CASP8|AKT1|PTGS2|MMP9|HIF1A|RELA
60965	5.297e-09	9.8628e-08	4	19	21	17956	negative regulation of gene silencing by miRNA	TGFB1|PPARG|ESR1|TP53
19438	5.3776e-09	9.9428e-08	11	1051	21	17956	aromatic compound biosynthetic process	AR|JUN|CCNB1|TGFB1|PGR|PPARG|FOS|PTGS2|ESR1|TP53|RELA
31324	5.4559e-09	1.0018e-07	15	2593	21	17956	negative regulation of cellular metabolic process	JUN|TGFB1|PTGS2|MMP9|HIF1A|ESR1|RELA|VEGFA|AR|CCNB1|CASP3|CDK2|AKT1|PPARG|TP53
42493	6.36e-09	1.1522e-07	8	383	21	17956	response to drug	JUN|CCNB1|CASP3|PPARG|FOS|PTGS2|TP53|RELA
1901698	6.3626e-09	1.1522e-07	11	1068	21	17956	response to nitrogen compound	CCNA2|JUN|CASP3|CDK2|AKT1|PPARG|FOS|PTGS2|MMP9|TP53|RELA
60149	6.6162e-09	1.182e-07	4	20	21	17956	negative regulation of posttranscriptional gene silencing	TGFB1|PPARG|ESR1|TP53
60967	6.6162e-09	1.182e-07	4	20	21	17956	negative regulation of gene silencing by RNA	TGFB1|PPARG|ESR1|TP53
48856	7.2595e-09	1.2882e-07	19	5235	21	17956	anatomical structure development	JUN|TGFB1|FOS|PTGS2|MMP9|HIF1A|ESR1|RELA|VEGFA|CASP9|CCNA2|AR|CCNB1|CASP8|CASP3|AKT1|PGR|PPARG|TP53
51240	7.3588e-09	1.2945e-07	12	1401	21	17956	positive regulation of multicellular organismal process	AR|JUN|CCNB1|TGFB1|CASP8|AKT1|PPARG|FOS|PTGS2|HIF1A|RELA|VEGFA
43170	7.4386e-09	1.2945e-07	20	6176	21	17956	macromolecule metabolic process	JUN|TGFB1|FOS|PTGS2|MMP9|HIF1A|ESR1|RELA|CASP9|CCNA2|AR|CCNB1|CASP8|CASP3|CDK2|CYCS|AKT1|PGR|PPARG|TP53
51239	7.4913e-09	1.2945e-07	15	2652	21	17956	regulation of multicellular organismal process	JUN|TGFB1|FOS|PTGS2|MMP9|HIF1A|ESR1|RELA|VEGFA|AR|CCNB1|CASP8|AKT1|PPARG|TP53
1902531	7.5255e-09	1.2945e-07	13	1769	21	17956	regulation of intracellular signal transduction	JUN|TGFB1|PTGS2|MMP9|HIF1A|ESR1|RELA|VEGFA|AR|CASP8|CDK2|AKT1|TP53
51707	7.5396e-09	1.2945e-07	12	1404	21	17956	response to other organism	CASP9|JUN|TGFB1|CASP8|CASP3|AKT1|PPARG|FOS|PTGS2|HIF1A|TP53|RELA
43207	7.6624e-09	1.3071e-07	12	1406	21	17956	response to external biotic stimulus	CASP9|JUN|TGFB1|CASP8|CASP3|AKT1|PPARG|FOS|PTGS2|HIF1A|TP53|RELA
60135	8.1186e-09	1.376e-07	5	62	21	17956	maternal process involved in female pregnancy	AR|AKT1|PGR|PTGS2|ESR1
1901522	9.974e-09	1.6797e-07	4	22	21	17956	positive regulation of transcription from RNA polymerase II promoter involved in cellular response to chemical stimulus	HIF1A|TP53|RELA|VEGFA
9607	1.0126e-08	1.6945e-07	12	1441	21	17956	response to biotic stimulus	CASP9|JUN|TGFB1|CASP8|CASP3|AKT1|PPARG|FOS|PTGS2|HIF1A|TP53|RELA
43085	1.1475e-08	1.9082e-07	12	1457	21	17956	positive regulation of catalytic activity	CASP9|JUN|CCNB1|TGFB1|CASP8|CASP3|CYCS|AKT1|PPARG|HIF1A|ESR1|VEGFA
52548	1.1902e-08	1.9668e-07	8	415	21	17956	regulation of endopeptidase activity	CASP9|CASP8|CYCS|AKT1|PPARG|PTGS2|MMP9|VEGFA
10942	1.2444e-08	2.0437e-07	9	615	21	17956	positive regulation of cell death	CASP9|JUN|CASP8|CASP3|AKT1|PPARG|FOS|PTGS2|TP53
31399	1.362e-08	2.2228e-07	13	1857	21	17956	regulation of protein modification process	JUN|TGFB1|PTGS2|MMP9|HIF1A|RELA|VEGFA|CCNA2|AR|CCNB1|CASP3|AKT1|TP53
34349	1.3766e-08	2.2329e-07	3	5	21	17956	glial cell apoptotic process	CASP9|CASP3|TP53
51090	1.6568e-08	2.671e-07	8	433	21	17956	regulation of DNA-binding transcription factor activity	AR|JUN|AKT1|PPARG|FOS|ESR1|RELA|VEGFA
30522	1.6936e-08	2.7139e-07	6	153	21	17956	intracellular receptor signaling pathway	AR|CASP8|PGR|PPARG|ESR1|RELA
7568	1.7724e-08	2.8231e-07	7	275	21	17956	aging	CASP9|JUN|AKT1|FOS|PTGS2|TP53|RELA
1901362	1.9172e-08	3.024e-07	11	1187	21	17956	organic cyclic compound biosynthetic process	AR|JUN|CCNB1|TGFB1|PGR|PPARG|FOS|PTGS2|ESR1|TP53|RELA
44271	1.9214e-08	3.024e-07	12	1525	21	17956	cellular nitrogen compound biosynthetic process	AR|JUN|CCNB1|TGFB1|AKT1|PGR|PPARG|FOS|PTGS2|ESR1|TP53|RELA
52547	2.0492e-08	3.206e-07	8	445	21	17956	regulation of peptidase activity	CASP9|CASP8|CYCS|AKT1|PPARG|PTGS2|MMP9|VEGFA
51172	2.4517e-08	3.8131e-07	14	2390	21	17956	negative regulation of nitrogen compound metabolic process	JUN|TGFB1|PTGS2|MMP9|ESR1|RELA|VEGFA|AR|CCNB1|CASP3|CDK2|AKT1|PPARG|TP53
30855	2.7155e-08	4.1987e-07	9	673	21	17956	epithelial cell differentiation	AR|JUN|CASP3|AKT1|PGR|PPARG|HIF1A|ESR1|VEGFA
60745	2.751e-08	4.2045e-07	3	6	21	17956	mammary gland branching involved in pregnancy	AR|PGR|ESR1
61419	2.751e-08	4.2045e-07	3	6	21	17956	positive regulation of transcription from RNA polymerase II promoter in response to hypoxia	HIF1A|TP53|VEGFA
10594	2.8591e-08	4.3446e-07	6	167	21	17956	regulation of endothelial cell migration	TGFB1|AKT1|PPARG|PTGS2|HIF1A|VEGFA
34645	3.0314e-08	4.58e-07	12	1588	21	17956	cellular macromolecule biosynthetic process	AR|JUN|CCNB1|CDK2|AKT1|PGR|PPARG|FOS|HIF1A|ESR1|TP53|RELA
10629	3.1974e-08	4.8033e-07	13	1992	21	17956	negative regulation of gene expression	JUN|TGFB1|HIF1A|ESR1|RELA|VEGFA|AR|CCNB1|CDK2|AKT1|PGR|PPARG|TP53
32502	3.3462e-08	4.9985e-07	19	5693	21	17956	developmental process	JUN|TGFB1|FOS|PTGS2|MMP9|HIF1A|ESR1|RELA|VEGFA|CASP9|CCNA2|AR|CCNB1|CASP8|CASP3|AKT1|PGR|PPARG|TP53
71214	3.6113e-08	5.3342e-07	7	305	21	17956	cellular response to abiotic stimulus	CASP9|CASP8|CASP3|AKT1|PTGS2|MMP9|TP53
104004	3.6113e-08	5.3342e-07	7	305	21	17956	cellular response to environmental stimulus	CASP9|CASP8|CASP3|AKT1|PTGS2|MMP9|TP53
9605	3.6672e-08	5.3867e-07	14	2465	21	17956	response to external stimulus	JUN|TGFB1|FOS|PTGS2|HIF1A|RELA|VEGFA|CASP9|CCNB1|CASP8|CASP3|AKT1|PPARG|TP53
9968	3.7119e-08	5.3969e-07	11	1265	21	17956	negative regulation of signal transduction	AR|TGFB1|CASP8|AKT1|PPARG|PTGS2|MMP9|HIF1A|ESR1|TP53|RELA
42325	3.715e-08	5.3969e-07	12	1617	21	17956	regulation of phosphorylation	CCNA2|AR|JUN|CCNB1|TGFB1|CASP3|AKT1|PTGS2|MMP9|HIF1A|TP53|VEGFA
9059	4.1777e-08	6.036e-07	12	1634	21	17956	macromolecule biosynthetic process	AR|JUN|CCNB1|CDK2|AKT1|PGR|PPARG|FOS|HIF1A|ESR1|TP53|RELA
71496	4.2192e-08	6.0627e-07	7	312	21	17956	cellular response to external stimulus	JUN|CASP8|AKT1|PPARG|FOS|PTGS2|TP53
51336	4.3312e-08	6.1901e-07	11	1284	21	17956	regulation of hydrolase activity	CASP9|JUN|CASP8|CYCS|AKT1|PPARG|PTGS2|MMP9|ESR1|TP53|VEGFA
10243	4.6884e-08	6.6646e-07	10	983	21	17956	response to organonitrogen compound	CCNA2|JUN|CASP3|AKT1|PPARG|FOS|PTGS2|MMP9|TP53|RELA
44419	4.7166e-08	6.6688e-07	13	2057	21	17956	interspecies interaction between organisms	JUN|TGFB1|FOS|PTGS2|HIF1A|RELA|CASP9|CCNA2|CASP8|CASP3|AKT1|PPARG|TP53
30162	4.9175e-08	6.9159e-07	9	721	21	17956	regulation of proteolysis	CASP9|CASP8|CYCS|AKT1|PPARG|PTGS2|MMP9|TP53|VEGFA
9617	4.9765e-08	6.9618e-07	9	722	21	17956	response to bacterium	CASP9|JUN|TGFB1|CASP8|CASP3|AKT1|FOS|PTGS2|RELA
71345	5.5147e-08	7.6741e-07	10	1000	21	17956	cellular response to cytokine stimulus	TGFB1|CASP3|AKT1|FOS|PTGS2|MMP9|HIF1A|TP53|RELA|VEGFA
71248	5.9767e-08	8.2735e-07	6	189	21	17956	cellular response to metal ion	JUN|CCNB1|AKT1|FOS|PTGS2|MMP9
60969	6.2661e-08	8.629e-07	4	34	21	17956	negative regulation of gene silencing	TGFB1|PPARG|ESR1|TP53
10647	6.5095e-08	8.9177e-07	12	1700	21	17956	positive regulation of cell communication	AR|JUN|TGFB1|CASP8|AKT1|PTGS2|MMP9|HIF1A|ESR1|TP53|RELA|VEGFA
23056	6.8155e-08	9.2888e-07	12	1707	21	17956	positive regulation of signaling	AR|JUN|TGFB1|CASP8|AKT1|PTGS2|MMP9|HIF1A|ESR1|TP53|RELA|VEGFA
6807	6.8719e-08	9.3176e-07	20	6922	21	17956	nitrogen compound metabolic process	JUN|TGFB1|FOS|PTGS2|MMP9|HIF1A|ESR1|RELA|CASP9|CCNA2|AR|CCNB1|CASP8|CASP3|CDK2|CYCS|AKT1|PGR|PPARG|TP53
10648	7.7232e-08	1.0419e-06	11	1358	21	17956	negative regulation of cell communication	AR|TGFB1|CASP8|AKT1|PPARG|PTGS2|MMP9|HIF1A|ESR1|TP53|RELA
32269	7.8445e-08	1.0497e-06	10	1038	21	17956	negative regulation of cellular protein metabolic process	JUN|CCNB1|TGFB1|CASP3|AKT1|PTGS2|MMP9|TP53|RELA|VEGFA
45639	7.8775e-08	1.0497e-06	5	97	21	17956	positive regulation of myeloid cell differentiation	JUN|TGFB1|CASP8|FOS|HIF1A
23057	7.9008e-08	1.0497e-06	11	1361	21	17956	negative regulation of signaling	AR|TGFB1|CASP8|AKT1|PPARG|PTGS2|MMP9|HIF1A|ESR1|TP53|RELA
1701	8.3908e-08	1.1093e-06	7	345	21	17956	in utero embryonic development	AR|CCNB1|CASP8|AKT1|HIF1A|TP53|VEGFA
44249	8.8394e-08	1.1628e-06	14	2638	21	17956	cellular biosynthetic process	JUN|TGFB1|FOS|PTGS2|HIF1A|ESR1|RELA|AR|CCNB1|CDK2|AKT1|PGR|PPARG|TP53
43065	1.0395e-07	1.3606e-06	8	549	21	17956	positive regulation of apoptotic process	CASP9|JUN|CASP8|CASP3|AKT1|PPARG|PTGS2|TP53
71276	1.1071e-07	1.442e-06	4	39	21	17956	cellular response to cadmium ion	JUN|AKT1|FOS|MMP9
42327	1.1202e-07	1.4519e-06	10	1078	21	17956	positive regulation of phosphorylation	AR|JUN|CCNB1|TGFB1|AKT1|PTGS2|MMP9|HIF1A|TP53|VEGFA
43068	1.1617e-07	1.4984e-06	8	557	21	17956	positive regulation of programmed cell death	CASP9|JUN|CASP8|CASP3|AKT1|PPARG|PTGS2|TP53
51248	1.2009e-07	1.5414e-06	10	1086	21	17956	negative regulation of protein metabolic process	JUN|CCNB1|TGFB1|CASP3|AKT1|PTGS2|MMP9|TP53|RELA|VEGFA
10595	1.2305e-07	1.5717e-06	5	106	21	17956	positive regulation of endothelial cell migration	TGFB1|AKT1|PTGS2|HIF1A|VEGFA
50896	1.2538e-07	1.5938e-06	21	8430	21	17956	response to stimulus	JUN|TGFB1|FOS|PTGS2|MMP9|HIF1A|ESR1|RELA|VEGFA|CASP9|CCNA2|AR|CCNB1|CASP8|CASP3|CDK2|CYCS|AKT1|PGR|PPARG|TP53
19220	1.3259e-07	1.6773e-06	12	1812	21	17956	regulation of phosphate metabolic process	CCNA2|AR|JUN|CCNB1|TGFB1|CASP3|AKT1|PTGS2|MMP9|HIF1A|TP53|VEGFA
51174	1.334e-07	1.6796e-06	12	1813	21	17956	regulation of phosphorus metabolic process	CCNA2|AR|JUN|CCNB1|TGFB1|CASP3|AKT1|PTGS2|MMP9|HIF1A|TP53|VEGFA
2573	1.3514e-07	1.6934e-06	5	108	21	17956	myeloid leukocyte differentiation	JUN|CASP8|PPARG|MMP9|VEGFA
1901576	1.3888e-07	1.7321e-06	14	2732	21	17956	organic substance biosynthetic process	JUN|TGFB1|FOS|PTGS2|HIF1A|ESR1|RELA|AR|CCNB1|CDK2|AKT1|PGR|PPARG|TP53
1932	1.493e-07	1.8533e-06	11	1448	21	17956	regulation of protein phosphorylation	CCNA2|AR|JUN|CCNB1|TGFB1|CASP3|AKT1|PTGS2|MMP9|TP53|VEGFA
32025	1.6457e-07	2.0332e-06	3	10	21	17956	response to cobalt ion	CASP9|CASP8|CASP3
43620	1.7719e-07	2.179e-06	5	114	21	17956	regulation of DNA-templated transcription in response to stress	JUN|HIF1A|TP53|RELA|VEGFA
51130	1.8325e-07	2.2431e-06	10	1136	21	17956	positive regulation of cellular component organization	AR|CCNB1|TGFB1|CASP8|PPARG|MMP9|HIF1A|ESR1|TP53|VEGFA
9058	1.8451e-07	2.2482e-06	14	2793	21	17956	biosynthetic process	JUN|TGFB1|FOS|PTGS2|HIF1A|ESR1|RELA|AR|CCNB1|CDK2|AKT1|PGR|PPARG|TP53
44092	1.9095e-07	2.3159e-06	10	1141	21	17956	negative regulation of molecular function	JUN|CASP8|CASP3|AKT1|PPARG|PTGS2|MMP9|ESR1|TP53|VEGFA
6366	1.9323e-07	2.3329e-06	7	390	21	17956	transcription by RNA polymerase II	AR|JUN|CCNB1|PGR|PPARG|FOS|ESR1
46677	1.9964e-07	2.3994e-06	4	45	21	17956	response to antibiotic	CASP9|CASP8|CASP3|TP53
60968	2.0177e-07	2.4063e-06	5	117	21	17956	regulation of gene silencing	TGFB1|CDK2|PPARG|ESR1|TP53
43009	2.0286e-07	2.4063e-06	8	599	21	17956	chordate embryonic development	AR|CCNB1|TGFB1|CASP8|AKT1|HIF1A|TP53|VEGFA
45937	2.0387e-07	2.4063e-06	10	1149	21	17956	positive regulation of phosphate metabolic process	AR|JUN|CCNB1|TGFB1|AKT1|PTGS2|MMP9|HIF1A|TP53|VEGFA
10562	2.0387e-07	2.4063e-06	10	1149	21	17956	positive regulation of phosphorus metabolic process	AR|JUN|CCNB1|TGFB1|AKT1|PTGS2|MMP9|HIF1A|TP53|VEGFA
48146	2.6013e-07	3.0506e-06	4	48	21	17956	positive regulation of fibroblast proliferation	CCNA2|JUN|CCNB1|ESR1
9792	2.6075e-07	3.0506e-06	8	619	21	17956	embryo development ending in birth or egg hatching	AR|CCNB1|TGFB1|CASP8|AKT1|HIF1A|TP53|VEGFA
48514	2.6235e-07	3.054e-06	7	408	21	17956	blood vessel morphogenesis	JUN|TGFB1|CASP8|AKT1|PTGS2|HIF1A|VEGFA
44238	2.6335e-07	3.054e-06	20	7418	21	17956	primary metabolic process	JUN|TGFB1|FOS|PTGS2|MMP9|HIF1A|ESR1|RELA|CASP9|CCNA2|AR|CCNB1|CASP8|CASP3|CDK2|CYCS|AKT1|PGR|PPARG|TP53
9967	2.8575e-07	3.2992e-06	11	1543	21	17956	positive regulation of signal transduction	AR|JUN|TGFB1|CASP8|AKT1|MMP9|HIF1A|ESR1|TP53|RELA|VEGFA
10468	3.7373e-07	4.2962e-06	17	4834	21	17956	regulation of gene expression	JUN|TGFB1|FOS|PTGS2|HIF1A|ESR1|RELA|VEGFA|CCNA2|AR|CCNB1|CASP8|CDK2|AKT1|PGR|PPARG|TP53
48660	3.8247e-07	4.3642e-06	5	133	21	17956	regulation of smooth muscle cell proliferation	JUN|AKT1|PPARG|PTGS2|MMP9
1901699	3.8294e-07	4.3642e-06	8	651	21	17956	cellular response to nitrogen compound	CCNA2|CASP3|CDK2|AKT1|PPARG|PTGS2|TP53|RELA
1936	3.9699e-07	4.5004e-06	5	134	21	17956	regulation of endothelial cell proliferation	JUN|AKT1|PPARG|HIF1A|VEGFA
51960	3.9829e-07	4.5004e-06	7	434	21	17956	regulation of nervous system development	TGFB1|AKT1|PPARG|HIF1A|TP53|RELA|VEGFA
40008	4.0122e-07	4.5142e-06	8	655	21	17956	regulation of growth	AR|CCNB1|TGFB1|AKT1|PPARG|HIF1A|TP53|VEGFA
48583	4.2984e-07	4.8157e-06	16	4178	21	17956	regulation of response to stimulus	JUN|TGFB1|FOS|PTGS2|MMP9|HIF1A|ESR1|RELA|VEGFA|CASP9|AR|CASP8|CDK2|AKT1|PPARG|TP53
7166	4.3483e-07	4.851e-06	13	2476	21	17956	cell surface receptor signaling pathway	JUN|TGFB1|FOS|PTGS2|MMP9|HIF1A|RELA|VEGFA|CASP9|CASP8|CASP3|AKT1|TP53
48585	4.4576e-07	4.9521e-06	11	1612	21	17956	negative regulation of response to stimulus	AR|TGFB1|CASP8|AKT1|PPARG|PTGS2|MMP9|HIF1A|ESR1|TP53|RELA
43525	4.5354e-07	5.0174e-06	4	55	21	17956	positive regulation of neuron apoptotic process	CASP9|JUN|CASP3|TP53
34612	4.6996e-07	5.1774e-06	6	268	21	17956	response to tumor necrosis factor	CASP8|CASP3|AKT1|PTGS2|TP53|RELA
51091	4.8033e-07	5.2697e-06	6	269	21	17956	positive regulation of DNA-binding transcription factor activity	AR|AKT1|PPARG|ESR1|RELA|VEGFA
48468	4.8965e-07	5.3497e-06	11	1627	21	17956	cell development	CASP9|AR|JUN|CCNB1|CASP3|AKT1|PGR|PPARG|HIF1A|ESR1|VEGFA
48511	5.0165e-07	5.4583e-06	6	271	21	17956	rhythmic process	JUN|CASP3|PGR|PPARG|ESR1|TP53
9887	5.1638e-07	5.5956e-06	9	950	21	17956	animal organ morphogenesis	AR|JUN|TGFB1|PGR|HIF1A|ESR1|TP53|RELA|VEGFA
2763	5.2449e-07	5.6602e-06	4	57	21	17956	positive regulation of myeloid leukocyte differentiation	JUN|TGFB1|CASP8|FOS
9966	5.408e-07	5.8125e-06	14	3038	21	17956	regulation of signal transduction	JUN|TGFB1|PTGS2|MMP9|HIF1A|ESR1|RELA|VEGFA|AR|CASP8|CDK2|AKT1|PPARG|TP53
35556	5.4401e-07	5.8233e-06	11	1644	21	17956	intracellular signal transduction	CASP9|CCNA2|JUN|CCNB1|TGFB1|CASP8|CASP3|CDK2|AKT1|TP53|RELA
97194	6.034e-07	6.433e-06	4	59	21	17956	execution phase of apoptosis	CASP9|CASP8|CASP3|AKT1
1903799	6.2164e-07	6.6009e-06	3	15	21	17956	negative regulation of production of miRNAs involved in gene silencing by miRNA	TGFB1|ESR1|TP53
44260	6.3566e-07	6.7227e-06	17	5001	21	17956	cellular macromolecule metabolic process	JUN|TGFB1|FOS|HIF1A|ESR1|RELA|CCNA2|AR|CCNB1|CASP8|CASP3|CDK2|CYCS|AKT1|PGR|PPARG|TP53
9790	6.5403e-07	6.8895e-06	9	977	21	17956	embryo development	AR|CCNB1|TGFB1|CASP8|AKT1|MMP9|HIF1A|TP53|VEGFA
14074	6.7246e-07	7.0555e-06	5	149	21	17956	response to purine-containing compound	JUN|PPARG|FOS|PTGS2|RELA
97190	6.8762e-07	7.186e-06	6	286	21	17956	apoptotic signaling pathway	CASP9|JUN|TGFB1|CASP8|CASP3|TP53
1901652	7.1086e-07	7.3997e-06	7	473	21	17956	response to peptide	CCNA2|AKT1|PPARG|PTGS2|MMP9|TP53|RELA
30224	7.6452e-07	7.8667e-06	3	16	21	17956	monocyte differentiation	JUN|PPARG|VEGFA
1903131	7.6452e-07	7.8667e-06	3	16	21	17956	mononuclear cell differentiation	JUN|PPARG|VEGFA
6357	7.6466e-07	7.8667e-06	13	2597	21	17956	regulation of transcription by RNA polymerase II	JUN|TGFB1|FOS|HIF1A|ESR1|RELA|VEGFA|AR|CDK2|AKT1|PGR|PPARG|TP53
71704	7.7566e-07	7.949e-06	20	7844	21	17956	organic substance metabolic process	JUN|TGFB1|FOS|PTGS2|MMP9|HIF1A|ESR1|RELA|CASP9|CCNA2|AR|CCNB1|CASP8|CASP3|CDK2|CYCS|AKT1|PGR|PPARG|TP53
1890	7.9193e-07	8.0844e-06	5	154	21	17956	placenta development	CASP8|AKT1|PPARG|PTGS2|HIF1A
7167	8.2242e-07	8.3633e-06	8	720	21	17956	enzyme linked receptor protein signaling pathway	JUN|TGFB1|CASP3|AKT1|FOS|MMP9|TP53|VEGFA
1934	8.2955e-07	8.4035e-06	9	1005	21	17956	positive regulation of protein phosphorylation	AR|JUN|CCNB1|TGFB1|AKT1|PTGS2|MMP9|TP53|VEGFA
48469	8.4416e-07	8.5189e-06	5	156	21	17956	cell maturation	CCNB1|PGR|PPARG|HIF1A|VEGFA
51252	9.4441e-07	9.4561e-06	15	3761	21	17956	regulation of RNA metabolic process	JUN|TGFB1|FOS|HIF1A|ESR1|RELA|VEGFA|CCNA2|AR|CCNB1|CDK2|AKT1|PGR|PPARG|TP53
46686	9.5046e-07	9.4561e-06	4	66	21	17956	response to cadmium ion	JUN|AKT1|FOS|MMP9
1568	9.5133e-07	9.4561e-06	7	494	21	17956	blood vessel development	JUN|TGFB1|CASP8|AKT1|PTGS2|HIF1A|VEGFA
9991	9.5133e-07	9.4561e-06	7	494	21	17956	response to extracellular stimulus	JUN|AKT1|PPARG|FOS|PTGS2|TP53|RELA
60562	9.6329e-07	9.5391e-06	6	303	21	17956	epithelial tube morphogenesis	AR|TGFB1|PGR|HIF1A|ESR1|VEGFA
2001242	9.8672e-07	9.7346e-06	5	161	21	17956	regulation of intrinsic apoptotic signaling pathway	AKT1|PTGS2|MMP9|HIF1A|TP53
10821	1.0174e-06	9.9999e-06	5	162	21	17956	regulation of mitochondrion organization	CASP8|AKT1|MMP9|HIF1A|TP53
80134	1.0885e-06	1.0655e-05	10	1376	21	17956	regulation of response to stress	CASP9|AKT1|PPARG|PTGS2|MMP9|HIF1A|ESR1|TP53|RELA|VEGFA
32501	1.0921e-06	1.0655e-05	19	6907	21	17956	multicellular organismal process	JUN|TGFB1|FOS|PTGS2|MMP9|HIF1A|ESR1|RELA|VEGFA|CASP9|CCNA2|AR|CCNB1|CASP8|CASP3|AKT1|PGR|PPARG|TP53
1902532	1.1025e-06	1.0717e-05	7	505	21	17956	negative regulation of intracellular signal transduction	CASP8|AKT1|PTGS2|MMP9|HIF1A|ESR1|RELA
9266	1.1139e-06	1.0788e-05	5	165	21	17956	response to temperature stimulus	CASP8|AKT1|PPARG|FOS|PTGS2
6139	1.137e-06	1.0971e-05	13	2686	21	17956	nucleobase-containing compound metabolic process	JUN|TGFB1|FOS|PTGS2|ESR1|RELA|AR|CCNB1|CASP3|CDK2|PGR|PPARG|TP53
6954	1.1776e-06	1.1322e-05	7	510	21	17956	inflammatory response	JUN|TGFB1|AKT1|FOS|PTGS2|HIF1A|RELA
30335	1.2247e-06	1.1732e-05	7	513	21	17956	positive regulation of cell migration	JUN|TGFB1|AKT1|PTGS2|MMP9|HIF1A|VEGFA
1525	1.2532e-06	1.1962e-05	6	317	21	17956	angiogenesis	JUN|CASP8|AKT1|PTGS2|HIF1A|VEGFA
1944	1.2733e-06	1.211e-05	7	516	21	17956	vasculature development	JUN|TGFB1|CASP8|AKT1|PTGS2|HIF1A|VEGFA
6367	1.3674e-06	1.2959e-05	5	172	21	17956	transcription initiation from RNA polymerase II promoter	AR|CCNB1|PGR|PPARG|ESR1
51345	1.3916e-06	1.3141e-05	8	772	21	17956	positive regulation of hydrolase activity	CASP9|JUN|CASP8|CYCS|AKT1|PPARG|ESR1|VEGFA
2000147	1.6209e-06	1.5251e-05	7	535	21	17956	positive regulation of cell motility	JUN|TGFB1|AKT1|PTGS2|MMP9|HIF1A|VEGFA
48584	1.6309e-06	1.5291e-05	12	2277	21	17956	positive regulation of response to stimulus	AR|JUN|TGFB1|CASP8|AKT1|PTGS2|MMP9|HIF1A|ESR1|TP53|RELA|VEGFA
2521	1.7575e-06	1.642e-05	6	336	21	17956	leukocyte differentiation	JUN|CASP8|PPARG|MMP9|TP53|VEGFA
34641	1.773e-06	1.6506e-05	14	3337	21	17956	cellular nitrogen compound metabolic process	JUN|TGFB1|FOS|PTGS2|ESR1|RELA|AR|CCNB1|CASP3|CDK2|AKT1|PGR|PPARG|TP53
43086	1.8017e-06	1.6715e-05	8	799	21	17956	negative regulation of catalytic activity	CASP8|CASP3|AKT1|PPARG|PTGS2|MMP9|TP53|VEGFA
48519	1.8555e-06	1.7154e-05	17	5358	21	17956	negative regulation of biological process	JUN|TGFB1|PTGS2|MMP9|HIF1A|ESR1|RELA|VEGFA|AR|CCNB1|CASP8|CASP3|CDK2|AKT1|PGR|PPARG|TP53
51272	1.879e-06	1.7311e-05	7	547	21	17956	positive regulation of cellular component movement	JUN|TGFB1|AKT1|PTGS2|MMP9|HIF1A|VEGFA
40017	1.9252e-06	1.7675e-05	7	549	21	17956	positive regulation of locomotion	JUN|TGFB1|AKT1|PTGS2|MMP9|HIF1A|VEGFA
2000377	1.9575e-06	1.7909e-05	5	185	21	17956	regulation of reactive oxygen species metabolic process	TGFB1|AKT1|PTGS2|HIF1A|TP53
43154	2.0637e-06	1.8815e-05	4	80	21	17956	negative regulation of cysteine-type endopeptidase activity involved in apoptotic process	AKT1|PTGS2|MMP9|VEGFA
60444	2.093e-06	1.8951e-05	3	22	21	17956	branching involved in mammary gland duct morphogenesis	AR|PGR|ESR1
35994	2.093e-06	1.8951e-05	3	22	21	17956	response to muscle stretch	JUN|FOS|RELA
10646	2.2256e-06	2.0084e-05	14	3398	21	17956	regulation of cell communication	JUN|TGFB1|PTGS2|MMP9|HIF1A|ESR1|RELA|VEGFA|AR|CASP8|CDK2|AKT1|PPARG|TP53
50767	2.2637e-06	2.0358e-05	6	351	21	17956	regulation of neurogenesis	TGFB1|PPARG|HIF1A|TP53|RELA|VEGFA
6355	2.3176e-06	2.0772e-05	14	3409	21	17956	regulation of transcription, DNA-templated	JUN|TGFB1|FOS|HIF1A|ESR1|RELA|VEGFA|CCNA2|AR|CDK2|AKT1|PGR|PPARG|TP53
19219	2.3375e-06	2.0879e-05	15	4022	21	17956	regulation of nucleobase-containing compound metabolic process	JUN|TGFB1|FOS|HIF1A|ESR1|RELA|VEGFA|CCNA2|AR|CCNB1|CDK2|AKT1|PGR|PPARG|TP53
46483	2.4479e-06	2.1792e-05	13	2868	21	17956	heterocycle metabolic process	JUN|TGFB1|FOS|PTGS2|ESR1|RELA|AR|CCNB1|CASP3|CDK2|PGR|PPARG|TP53
1905475	2.472e-06	2.1933e-05	5	194	21	17956	regulation of protein localization to membrane	AR|TGFB1|CASP8|AKT1|TP53
23051	2.549e-06	2.254e-05	14	3435	21	17956	regulation of signaling	JUN|TGFB1|PTGS2|MMP9|HIF1A|ESR1|RELA|VEGFA|AR|CASP8|CDK2|AKT1|PPARG|TP53
6919	2.632e-06	2.312e-05	4	85	21	17956	activation of cysteine-type endopeptidase activity involved in apoptotic process	CASP9|CASP8|CYCS|PPARG
48661	2.632e-06	2.312e-05	4	85	21	17956	positive regulation of smooth muscle cell proliferation	JUN|AKT1|PTGS2|MMP9
50679	2.7323e-06	2.3842e-05	5	198	21	17956	positive regulation of epithelial cell proliferation	AR|JUN|AKT1|HIF1A|VEGFA
71695	2.7323e-06	2.3842e-05	5	198	21	17956	anatomical structure maturation	CCNB1|PGR|PPARG|HIF1A|VEGFA
36003	2.7466e-06	2.3888e-05	3	24	21	17956	positive regulation of transcription from RNA polymerase II promoter in response to stress	HIF1A|TP53|VEGFA
34644	2.889e-06	2.5017e-05	4	87	21	17956	cellular response to UV	CASP9|PTGS2|MMP9|TP53
8152	2.8954e-06	2.5017e-05	20	8399	21	17956	metabolic process	JUN|TGFB1|FOS|PTGS2|MMP9|HIF1A|ESR1|RELA|CASP9|CCNA2|AR|CCNB1|CASP8|CASP3|CDK2|CYCS|AKT1|PGR|PPARG|TP53
6725	2.9573e-06	2.5469e-05	13	2915	21	17956	cellular aromatic compound metabolic process	JUN|TGFB1|FOS|PTGS2|ESR1|RELA|AR|CCNB1|CASP3|CDK2|PGR|PPARG|TP53
1903506	2.978e-06	2.5564e-05	14	3478	21	17956	regulation of nucleic acid-templated transcription	JUN|TGFB1|FOS|HIF1A|ESR1|RELA|VEGFA|CCNA2|AR|CDK2|AKT1|PGR|PPARG|TP53
2000117	3.0243e-06	2.5859e-05	4	88	21	17956	negative regulation of cysteine-type endopeptidase activity	AKT1|PTGS2|MMP9|VEGFA
2001141	3.0319e-06	2.5859e-05	14	3483	21	17956	regulation of RNA biosynthetic process	JUN|TGFB1|FOS|HIF1A|ESR1|RELA|VEGFA|CCNA2|AR|CDK2|AKT1|PGR|PPARG|TP53
70920	3.1188e-06	2.6345e-05	3	25	21	17956	regulation of production of small RNA involved in gene silencing by RNA	TGFB1|ESR1|TP53
30225	3.1188e-06	2.6345e-05	3	25	21	17956	macrophage differentiation	CASP8|MMP9|VEGFA
1903798	3.1188e-06	2.6345e-05	3	25	21	17956	regulation of production of miRNAs involved in gene silencing by miRNA	TGFB1|ESR1|TP53
70542	3.1642e-06	2.6644e-05	4	89	21	17956	response to fatty acid	CCNB1|AKT1|PPARG|PTGS2
71417	3.248e-06	2.7262e-05	7	594	21	17956	cellular response to organonitrogen compound	CCNA2|CASP3|AKT1|PPARG|PTGS2|TP53|RELA
31326	3.271e-06	2.7368e-05	15	4124	21	17956	regulation of cellular biosynthetic process	JUN|TGFB1|FOS|PTGS2|HIF1A|ESR1|RELA|VEGFA|CCNA2|AR|CDK2|AKT1|PGR|PPARG|TP53
51726	3.3253e-06	2.7736e-05	9	1187	21	17956	regulation of cell cycle	CCNA2|JUN|CCNB1|TGFB1|CASP3|CDK2|AKT1|PTGS2|TP53
8585	3.4584e-06	2.8755e-05	4	91	21	17956	female gonad development	CASP3|PGR|ESR1|VEGFA
43523	3.4781e-06	2.8828e-05	5	208	21	17956	regulation of neuron apoptotic process	CASP9|JUN|CASP3|HIF1A|TP53
71887	3.5229e-06	2.9108e-05	3	26	21	17956	leukocyte apoptotic process	CASP9|CASP3|AKT1
30334	3.7078e-06	3.054e-05	8	880	21	17956	regulation of cell migration	JUN|TGFB1|AKT1|PPARG|PTGS2|MMP9|HIF1A|VEGFA
1901655	3.7724e-06	3.088e-05	4	93	21	17956	cellular response to ketone	CASP9|AR|AKT1|PPARG
10822	3.7724e-06	3.088e-05	4	93	21	17956	positive regulation of mitochondrion organization	CASP8|MMP9|HIF1A|TP53
8406	3.8177e-06	3.1155e-05	5	212	21	17956	gonad development	AR|CASP3|PGR|ESR1|VEGFA
48523	3.8993e-06	3.1587e-05	16	4865	21	17956	negative regulation of cellular process	JUN|TGFB1|PTGS2|MMP9|HIF1A|ESR1|RELA|VEGFA|AR|CCNB1|CASP8|CASP3|CDK2|AKT1|PPARG|TP53
60748	3.9054e-06	3.1587e-05	2	3	21	17956	tertiary branching involved in mammary gland duct morphogenesis	AR|PGR
6352	3.9066e-06	3.1587e-05	5	213	21	17956	DNA-templated transcription, initiation	AR|CCNB1|PGR|PPARG|ESR1
60964	3.937e-06	3.1736e-05	4	94	21	17956	regulation of gene silencing by miRNA	TGFB1|PPARG|ESR1|TP53
2682	4.0599e-06	3.2628e-05	10	1589	21	17956	regulation of immune system process	JUN|TGFB1|CASP8|CASP3|AKT1|PPARG|FOS|HIF1A|RELA|VEGFA
9889	4.229e-06	3.3883e-05	15	4204	21	17956	regulation of biosynthetic process	JUN|TGFB1|FOS|PTGS2|HIF1A|ESR1|RELA|VEGFA|CCNA2|AR|CDK2|AKT1|PGR|PPARG|TP53
79	4.2823e-06	3.3899e-05	4	96	21	17956	regulation of cyclin-dependent protein serine/threonine kinase activity	CCNA2|CCNB1|CASP3|AKT1
46545	4.2823e-06	3.3899e-05	4	96	21	17956	development of primary female sexual characteristics	CASP3|PGR|ESR1|VEGFA
1938	4.2823e-06	3.3899e-05	4	96	21	17956	positive regulation of endothelial cell proliferation	JUN|AKT1|HIF1A|VEGFA
60147	4.2823e-06	3.3899e-05	4	96	21	17956	regulation of posttranscriptional gene silencing	TGFB1|PPARG|ESR1|TP53
31401	4.3729e-06	3.4431e-05	9	1227	21	17956	positive regulation of protein modification process	AR|JUN|CCNB1|TGFB1|AKT1|PTGS2|MMP9|TP53|VEGFA
45137	4.3756e-06	3.4431e-05	5	218	21	17956	development of primary sexual characteristics	AR|CASP3|PGR|ESR1|VEGFA
10575	4.4322e-06	3.4605e-05	3	28	21	17956	positive regulation of vascular endothelial growth factor production	TGFB1|PTGS2|HIF1A
2000379	4.4631e-06	3.4605e-05	4	97	21	17956	positive regulation of reactive oxygen species metabolic process	TGFB1|AKT1|PTGS2|TP53
2001243	4.4631e-06	3.4605e-05	4	97	21	17956	negative regulation of intrinsic apoptotic signaling pathway	AKT1|PTGS2|MMP9|HIF1A
7179	4.4631e-06	3.4605e-05	4	97	21	17956	transforming growth factor beta receptor signaling pathway	JUN|TGFB1|FOS|TP53
60966	4.4631e-06	3.4605e-05	4	97	21	17956	regulation of gene silencing by RNA	TGFB1|PPARG|ESR1|TP53
122	4.4919e-06	3.4727e-05	8	903	21	17956	negative regulation of transcription by RNA polymerase II	AR|JUN|CDK2|PPARG|ESR1|TP53|RELA|VEGFA
22612	4.6495e-06	3.584e-05	4	98	21	17956	gland morphogenesis	AR|TGFB1|PGR|ESR1
50769	4.6775e-06	3.5951e-05	5	221	21	17956	positive regulation of neurogenesis	TGFB1|PPARG|HIF1A|RELA|VEGFA
6915	4.7183e-06	3.616e-05	8	909	21	17956	apoptotic process	CASP9|JUN|TGFB1|CASP8|CASP3|CYCS|AKT1|TP53
8015	4.7419e-06	3.6236e-05	6	399	21	17956	blood circulation	AR|TGFB1|AKT1|PPARG|PTGS2|VEGFA
51050	4.757e-06	3.6246e-05	8	910	21	17956	positive regulation of transport	TGFB1|CASP8|AKT1|PPARG|PTGS2|HIF1A|TP53|VEGFA
97191	4.8416e-06	3.6785e-05	4	99	21	17956	extrinsic apoptotic signaling pathway	CASP9|TGFB1|CASP8|CASP3
19538	5.0137e-06	3.7961e-05	15	4258	21	17956	protein metabolic process	TGFB1|MMP9|HIF1A|ESR1|RELA|CASP9|CCNA2|AR|CCNB1|CASP8|CASP3|CDK2|CYCS|AKT1|TP53
45892	5.0294e-06	3.7961e-05	9	1248	21	17956	negative regulation of transcription, DNA-templated	AR|JUN|TGFB1|CDK2|PPARG|ESR1|TP53|RELA|VEGFA
1904029	5.0395e-06	3.7961e-05	4	100	21	17956	regulation of cyclin-dependent protein kinase activity	CCNA2|CCNB1|CASP3|AKT1
45637	5.4458e-06	4.0906e-05	5	228	21	17956	regulation of myeloid cell differentiation	JUN|TGFB1|CASP8|FOS|HIF1A
60603	5.4847e-06	4.1081e-05	3	30	21	17956	mammary gland duct morphogenesis	AR|PGR|ESR1
42770	5.6692e-06	4.2343e-05	4	103	21	17956	signal transduction in response to DNA damage	CASP9|CCNB1|CDK2|TP53
2001237	5.8915e-06	4.3879e-05	4	104	21	17956	negative regulation of extrinsic apoptotic signaling pathway	AR|CASP8|AKT1|RELA
21700	6.0529e-06	4.4939e-05	5	233	21	17956	developmental maturation	CCNB1|PGR|PPARG|HIF1A|VEGFA
16572	6.0678e-06	4.4939e-05	3	31	21	17956	histone phosphorylation	CCNA2|CCNB1|CDK2
2000145	6.0974e-06	4.5032e-05	8	941	21	17956	regulation of cell motility	JUN|TGFB1|AKT1|PPARG|PTGS2|MMP9|HIF1A|VEGFA
43279	6.1202e-06	4.5075e-05	4	105	21	17956	response to alkaloid	CCNA2|CASP3|PPARG|RELA
1903507	6.4771e-06	4.7571e-05	9	1287	21	17956	negative regulation of nucleic acid-templated transcription	AR|JUN|TGFB1|CDK2|PPARG|ESR1|TP53|RELA|VEGFA
1902679	6.5602e-06	4.8048e-05	9	1289	21	17956	negative regulation of RNA biosynthetic process	AR|JUN|TGFB1|CDK2|PPARG|ESR1|TP53|RELA|VEGFA
10574	6.6904e-06	4.8866e-05	3	32	21	17956	regulation of vascular endothelial growth factor production	TGFB1|PTGS2|HIF1A
43618	6.8457e-06	4.9862e-05	4	108	21	17956	regulation of transcription from RNA polymerase II promoter in response to stress	JUN|HIF1A|TP53|VEGFA
97305	6.9906e-06	5.0778e-05	5	240	21	17956	response to alcohol	TGFB1|CASP8|AKT1|PPARG|FOS
33138	7.1011e-06	5.1299e-05	4	109	21	17956	positive regulation of peptidyl-serine phosphorylation	TGFB1|AKT1|PTGS2|VEGFA
6275	7.1011e-06	5.1299e-05	4	109	21	17956	regulation of DNA replication	CCNA2|JUN|CDK2|TP53
1901360	7.2152e-06	5.1981e-05	13	3149	21	17956	organic cyclic compound metabolic process	JUN|TGFB1|FOS|PTGS2|ESR1|RELA|AR|CCNB1|CASP3|CDK2|PGR|PPARG|TP53
46660	7.3635e-06	5.2905e-05	4	110	21	17956	female sex differentiation	CASP3|PGR|ESR1|VEGFA
3007	7.4258e-06	5.3208e-05	5	243	21	17956	heart morphogenesis	JUN|TGFB1|HIF1A|TP53|VEGFA
2009	7.4793e-06	5.3447e-05	6	432	21	17956	morphogenesis of an epithelium	AR|TGFB1|PGR|HIF1A|ESR1|VEGFA
1902692	8.0596e-06	5.7438e-05	3	34	21	17956	regulation of neuroblast proliferation	HIF1A|TP53|VEGFA
71482	8.1937e-06	5.8237e-05	4	113	21	17956	cellular response to light stimulus	CASP9|PTGS2|MMP9|TP53
40012	8.3546e-06	5.9221e-05	8	982	21	17956	regulation of locomotion	JUN|TGFB1|AKT1|PPARG|PTGS2|MMP9|HIF1A|VEGFA
8285	8.385e-06	5.9278e-05	7	686	21	17956	negative regulation of cell population proliferation	AR|JUN|TGFB1|CASP3|PPARG|PTGS2|TP53
62012	8.4151e-06	5.9332e-05	6	441	21	17956	regulation of small molecule metabolic process	TGFB1|AKT1|PPARG|PTGS2|HIF1A|TP53
48568	9.3249e-06	6.5572e-05	6	449	21	17956	embryonic organ development	TGFB1|CASP8|AKT1|HIF1A|TP53|VEGFA
2000144	9.6021e-06	6.7206e-05	3	36	21	17956	positive regulation of DNA-templated transcription, initiation	JUN|ESR1|TP53
1902533	9.6206e-06	6.7206e-05	8	1001	21	17956	positive regulation of intracellular signal transduction	AR|JUN|TGFB1|CASP8|ESR1|TP53|RELA|VEGFA
90304	9.6336e-06	6.7206e-05	11	2194	21	17956	nucleic acid metabolic process	AR|JUN|CCNB1|CASP3|CDK2|PGR|PPARG|FOS|ESR1|TP53|RELA
2761	9.7284e-06	6.7689e-05	4	118	21	17956	regulation of myeloid leukocyte differentiation	JUN|TGFB1|CASP8|FOS
51338	9.9069e-06	6.8737e-05	8	1005	21	17956	regulation of transferase activity	CCNA2|CCNB1|TGFB1|CASP3|AKT1|PPARG|TP53|VEGFA
7611	9.931e-06	6.8737e-05	5	258	21	17956	learning or memory	JUN|CASP3|FOS|PTGS2|HIF1A
22008	1.0482e-05	7.2307e-05	9	1365	21	17956	neurogenesis	JUN|TGFB1|CASP3|AKT1|PPARG|HIF1A|TP53|RELA|VEGFA
44703	1.0501e-05	7.2307e-05	8	1013	21	17956	multi-organism reproductive process	AR|CCNB1|AKT1|PGR|FOS|PTGS2|MMP9|ESR1
51270	1.0888e-05	7.4775e-05	8	1018	21	17956	regulation of cellular component movement	JUN|TGFB1|AKT1|PPARG|PTGS2|MMP9|HIF1A|VEGFA
31667	1.0973e-05	7.5162e-05	6	462	21	17956	response to nutrient levels	JUN|AKT1|PPARG|PTGS2|TP53|RELA
2000112	1.111e-05	7.5903e-05	14	3868	21	17956	regulation of cellular macromolecule biosynthetic process	JUN|TGFB1|FOS|HIF1A|ESR1|RELA|VEGFA|CCNA2|AR|CDK2|AKT1|PGR|PPARG|TP53
61061	1.1667e-05	7.9502e-05	6	467	21	17956	muscle structure development	CCNB1|TGFB1|CASP3|AKT1|FOS|VEGFA
51101	1.1839e-05	8.0468e-05	4	124	21	17956	regulation of DNA binding	JUN|TGFB1|PPARG|MMP9
51253	1.208e-05	8.1899e-05	9	1389	21	17956	negative regulation of RNA metabolic process	AR|JUN|TGFB1|CDK2|PPARG|ESR1|TP53|RELA|VEGFA
7548	1.2156e-05	8.2198e-05	5	269	21	17956	sex differentiation	AR|CASP3|PGR|ESR1|VEGFA
1901564	1.2429e-05	8.3831e-05	16	5278	21	17956	organonitrogen compound metabolic process	TGFB1|PTGS2|MMP9|HIF1A|ESR1|RELA|CASP9|CCNA2|AR|CCNB1|CASP8|CASP3|CDK2|CYCS|AKT1|TP53
12501	1.2918e-05	8.6907e-05	8	1042	21	17956	programmed cell death	CASP9|JUN|TGFB1|CASP8|CASP3|CYCS|AKT1|TP53
2248	1.3e-05	8.7237e-05	2	5	21	17956	connective tissue replacement involved in inflammatory response wound healing	TGFB1|HIF1A
51962	1.3055e-05	8.7384e-05	5	273	21	17956	positive regulation of nervous system development	TGFB1|PPARG|HIF1A|RELA|VEGFA
16579	1.3763e-05	9.189e-05	5	276	21	17956	protein deubiquitination	CCNA2|AR|HIF1A|ESR1|TP53
6952	1.4371e-05	9.571e-05	9	1419	21	17956	defense response	JUN|TGFB1|AKT1|PPARG|FOS|PTGS2|HIF1A|TP53|RELA
60284	1.4465e-05	9.6096e-05	6	485	21	17956	regulation of cell development	TGFB1|PPARG|HIF1A|TP53|RELA|VEGFA
48754	1.4708e-05	9.7462e-05	4	131	21	17956	branching morphogenesis of an epithelial tube	AR|PGR|ESR1|VEGFA
9755	1.5156e-05	9.9931e-05	4	132	21	17956	hormone-mediated signaling pathway	AR|PGR|PPARG|ESR1
43280	1.5156e-05	9.9931e-05	4	132	21	17956	positive regulation of cysteine-type endopeptidase activity involved in apoptotic process	CASP9|CASP8|CYCS|PPARG
10556	1.5235e-05	0.0001002	14	3969	21	17956	regulation of macromolecule biosynthetic process	JUN|TGFB1|FOS|HIF1A|ESR1|RELA|VEGFA|CCNA2|AR|CDK2|AKT1|PGR|PPARG|TP53
60443	1.5369e-05	0.00010058	3	42	21	17956	mammary gland morphogenesis	AR|PGR|ESR1
35924	1.5369e-05	0.00010058	3	42	21	17956	cellular response to vascular endothelial growth factor stimulus	AKT1|RELA|VEGFA
3013	1.5511e-05	0.00010126	6	491	21	17956	circulatory system process	AR|TGFB1|AKT1|PPARG|PTGS2|VEGFA
45598	1.5614e-05	0.00010143	4	133	21	17956	regulation of fat cell differentiation	TGFB1|AKT1|PPARG|PTGS2
46683	1.5614e-05	0.00010143	4	133	21	17956	response to organophosphorus	JUN|FOS|PTGS2|RELA
71900	1.5691e-05	0.00010168	6	492	21	17956	regulation of protein serine/threonine kinase activity	CCNA2|CCNB1|TGFB1|CASP3|AKT1|VEGFA
2376	1.6395e-05	0.00010598	12	2826	21	17956	immune system process	CASP9|JUN|TGFB1|CASP8|CASP3|AKT1|PPARG|MMP9|HIF1A|TP53|RELA|VEGFA
45687	1.6509e-05	0.00010647	3	43	21	17956	positive regulation of glial cell differentiation	TGFB1|PPARG|RELA
8219	1.6672e-05	0.00010725	8	1079	21	17956	cell death	CASP9|JUN|TGFB1|CASP8|CASP3|CYCS|AKT1|TP53
2000113	1.6743e-05	0.00010745	9	1446	21	17956	negative regulation of cellular macromolecule biosynthetic process	AR|JUN|TGFB1|CDK2|PPARG|ESR1|TP53|RELA|VEGFA
51704	1.6899e-05	0.00010819	8	1081	21	17956	multi-organism process	AR|CCNB1|AKT1|PGR|FOS|PTGS2|MMP9|ESR1
51128	1.7442e-05	0.00011139	11	2332	21	17956	regulation of cellular component organization	AR|CCNB1|TGFB1|CASP8|AKT1|PPARG|MMP9|HIF1A|ESR1|TP53|VEGFA
2000142	1.7704e-05	0.00011252	3	44	21	17956	regulation of DNA-templated transcription, initiation	JUN|ESR1|TP53
22602	1.7704e-05	0.00011252	3	44	21	17956	ovulation cycle process	CASP3|PGR|ESR1
10720	1.8061e-05	0.00011452	5	292	21	17956	positive regulation of cell development	TGFB1|PPARG|HIF1A|RELA|VEGFA
70646	1.8664e-05	0.00011806	5	294	21	17956	protein modification by small protein removal	CCNA2|AR|HIF1A|ESR1|TP53
71383	1.9112e-05	0.0001206	4	140	21	17956	cellular response to steroid hormone stimulus	CASP9|AR|PGR|ESR1
1903829	1.9284e-05	0.00012139	5	296	21	17956	positive regulation of cellular protein localization	TGFB1|CASP8|AKT1|PTGS2|TP53
2246	1.9486e-05	0.00012209	2	6	21	17956	wound healing involved in inflammatory response	TGFB1|HIF1A
97709	1.9486e-05	0.00012209	2	6	21	17956	connective tissue replacement	TGFB1|HIF1A
51384	2.0209e-05	0.00012632	4	142	21	17956	response to glucocorticoid	CASP9|CASP3|FOS|PTGS2
50890	2.057e-05	0.00012827	5	300	21	17956	cognition	JUN|CASP3|FOS|PTGS2|HIF1A
33135	2.0775e-05	0.00012925	4	143	21	17956	regulation of peptidyl-serine phosphorylation	TGFB1|AKT1|PTGS2|VEGFA
45934	2.1564e-05	0.00013384	9	1492	21	17956	negative regulation of nucleobase-containing compound metabolic process	AR|JUN|TGFB1|CDK2|PPARG|ESR1|TP53|RELA|VEGFA
32570	2.1627e-05	0.00013391	3	47	21	17956	response to progesterone	TGFB1|FOS|RELA
10558	2.2035e-05	0.00013612	9	1496	21	17956	negative regulation of macromolecule biosynthetic process	AR|JUN|TGFB1|CDK2|PPARG|ESR1|TP53|RELA|VEGFA
9409	2.3051e-05	0.00014207	3	48	21	17956	response to cold	CASP8|PPARG|FOS
71560	2.3156e-05	0.00014238	4	147	21	17956	cellular response to transforming growth factor beta stimulus	JUN|TGFB1|FOS|TP53
62013	2.3781e-05	0.00014555	4	148	21	17956	positive regulation of small molecule metabolic process	AKT1|PPARG|PTGS2|HIF1A
7612	2.3781e-05	0.00014555	4	148	21	17956	learning	JUN|FOS|PTGS2|HIF1A
2000045	2.4418e-05	0.00014876	4	149	21	17956	regulation of G1/S transition of mitotic cell cycle	CCNB1|CDK2|AKT1|TP53
2001056	2.4418e-05	0.00014876	4	149	21	17956	positive regulation of cysteine-type endopeptidase activity	CASP9|CASP8|CYCS|PPARG
90199	2.4536e-05	0.00014913	3	49	21	17956	regulation of release of cytochrome c from mitochondria	AKT1|MMP9|TP53
1904705	2.6083e-05	0.00015817	3	50	21	17956	regulation of vascular associated smooth muscle cell proliferation	JUN|PPARG|MMP9
48729	2.6283e-05	0.00015902	6	539	21	17956	tissue morphogenesis	AR|TGFB1|PGR|HIF1A|ESR1|VEGFA
45834	2.6406e-05	0.0001594	4	152	21	17956	positive regulation of lipid metabolic process	TGFB1|AKT1|PPARG|PTGS2
8635	2.7261e-05	0.00016344	2	7	21	17956	activation of cysteine-type endopeptidase activity involved in apoptotic process by cytochrome c	CASP9|CYCS
10742	2.7261e-05	0.00016344	2	7	21	17956	macrophage derived foam cell differentiation	TGFB1|PPARG
90077	2.7261e-05	0.00016344	2	7	21	17956	foam cell differentiation	TGFB1|PPARG
2260	2.7692e-05	0.00016515	3	51	21	17956	lymphocyte homeostasis	CASP3|AKT1|HIF1A
71559	2.7796e-05	0.00016515	4	154	21	17956	response to transforming growth factor beta	JUN|TGFB1|FOS|TP53
31099	2.7796e-05	0.00016515	4	154	21	17956	regeneration	CCNA2|JUN|CCNB1|PPARG
7093	2.7796e-05	0.00016515	4	154	21	17956	mitotic cell cycle checkpoint	CCNB1|TGFB1|CDK2|TP53
1902107	2.8511e-05	0.00016864	4	155	21	17956	positive regulation of leukocyte differentiation	JUN|TGFB1|CASP8|FOS
1903708	2.8511e-05	0.00016864	4	155	21	17956	positive regulation of hemopoiesis	JUN|TGFB1|CASP8|FOS
60341	2.8694e-05	0.00016934	7	829	21	17956	regulation of cellular localization	AR|TGFB1|CASP8|AKT1|PTGS2|HIF1A|TP53
2001236	2.998e-05	0.00017654	4	157	21	17956	regulation of extrinsic apoptotic signaling pathway	AR|CASP8|AKT1|RELA
31327	3.0229e-05	0.00017761	9	1556	21	17956	negative regulation of cellular biosynthetic process	AR|JUN|TGFB1|CDK2|PPARG|ESR1|TP53|RELA|VEGFA
1903827	3.0365e-05	0.00017801	6	553	21	17956	regulation of cellular protein localization	AR|TGFB1|CASP8|AKT1|PTGS2|TP53
61138	3.0736e-05	0.00017979	4	158	21	17956	morphogenesis of a branching epithelium	AR|PGR|ESR1|VEGFA
30518	3.1104e-05	0.00018154	3	53	21	17956	intracellular steroid hormone receptor signaling pathway	AR|PGR|ESR1
48609	3.1475e-05	0.00018307	7	841	21	17956	multicellular organismal reproductive process	AR|CCNB1|CASP3|AKT1|PGR|PTGS2|ESR1
31960	3.1505e-05	0.00018307	4	159	21	17956	response to corticosteroid	CASP9|CASP3|FOS|PTGS2
7610	3.3919e-05	0.00019667	6	564	21	17956	behavior	JUN|CASP3|FOS|PTGS2|HIF1A|TP53
1901653	3.4418e-05	0.00019905	5	334	21	17956	cellular response to peptide	CCNA2|AKT1|PPARG|TP53|RELA
45786	3.4599e-05	0.00019905	6	566	21	17956	negative regulation of cell cycle	CCNB1|TGFB1|CASP3|CDK2|PTGS2|TP53
16070	3.4694e-05	0.00019905	9	1583	21	17956	RNA metabolic process	AR|JUN|CCNB1|PGR|PPARG|FOS|ESR1|TP53|RELA
43467	3.4724e-05	0.00019905	4	163	21	17956	regulation of generation of precursor metabolites and energy	CCNB1|AKT1|HIF1A|TP53
71398	3.4781e-05	0.00019905	3	55	21	17956	cellular response to fatty acid	CCNB1|AKT1|PPARG
60688	3.4781e-05	0.00019905	3	55	21	17956	regulation of morphogenesis of a branching structure	AR|ESR1|VEGFA
9890	3.487e-05	0.00019913	9	1584	21	17956	negative regulation of biosynthetic process	AR|JUN|TGFB1|CDK2|PPARG|ESR1|TP53|RELA|VEGFA
90594	3.6322e-05	0.00020624	2	8	21	17956	inflammatory response to wounding	TGFB1|HIF1A
32504	3.6333e-05	0.00020624	7	860	21	17956	multicellular organism reproduction	AR|CCNB1|CASP3|AKT1|PGR|PTGS2|ESR1
45936	3.635e-05	0.00020624	6	571	21	17956	negative regulation of phosphate metabolic process	JUN|CCNB1|TGFB1|CASP3|AKT1|TP53
10563	3.6708e-05	0.00020746	6	572	21	17956	negative regulation of phosphorus metabolic process	JUN|CCNB1|TGFB1|CASP3|AKT1|TP53
6977	3.6722e-05	0.00020746	3	56	21	17956	DNA damage response, signal transduction by p53 class mediator resulting in cell cycle arrest	CCNB1|CDK2|TP53
16241	3.7292e-05	0.00021023	4	166	21	17956	regulation of macroautophagy	CASP3|AKT1|HIF1A|TP53
1763	3.8178e-05	0.00021425	4	167	21	17956	morphogenesis of a branching structure	AR|PGR|ESR1|VEGFA
3008	3.8441e-05	0.00021425	10	2044	21	17956	system process	AR|JUN|TGFB1|CASP3|AKT1|PPARG|FOS|PTGS2|HIF1A|VEGFA
45861	3.8538e-05	0.00021425	5	342	21	17956	negative regulation of proteolysis	AKT1|PTGS2|MMP9|TP53|VEGFA
8637	3.8733e-05	0.00021425	3	57	21	17956	apoptotic mitochondrial changes	JUN|AKT1|TP53
1902400	3.8733e-05	0.00021425	3	57	21	17956	intracellular signal transduction involved in G1 DNA damage checkpoint	CCNB1|CDK2|TP53
1902403	3.8733e-05	0.00021425	3	57	21	17956	signal transduction involved in mitotic DNA integrity checkpoint	CCNB1|CDK2|TP53
1902402	3.8733e-05	0.00021425	3	57	21	17956	signal transduction involved in mitotic DNA damage checkpoint	CCNB1|CDK2|TP53
72413	3.8733e-05	0.00021425	3	57	21	17956	signal transduction involved in mitotic cell cycle checkpoint	CCNB1|CDK2|TP53
72431	3.8733e-05	0.00021425	3	57	21	17956	signal transduction involved in mitotic G1 DNA damage checkpoint	CCNB1|CDK2|TP53
1902806	3.9996e-05	0.00022077	4	169	21	17956	regulation of cell cycle G1/S phase transition	CCNB1|CDK2|AKT1|TP53
51222	4.0736e-05	0.00022436	5	346	21	17956	positive regulation of protein transport	TGFB1|CASP8|PTGS2|HIF1A|TP53
43388	4.0815e-05	0.00022436	3	58	21	17956	positive regulation of DNA binding	TGFB1|PPARG|MMP9
71478	4.0929e-05	0.00022452	4	170	21	17956	cellular response to radiation	CASP9|PTGS2|MMP9|TP53
10950	4.2842e-05	0.00023452	4	172	21	17956	positive regulation of endopeptidase activity	CASP9|CASP8|CYCS|PPARG
60395	4.2969e-05	0.00023473	3	59	21	17956	SMAD protein signal transduction	JUN|TGFB1|FOS
10638	4.3666e-05	0.00023805	6	590	21	17956	positive regulation of organelle organization	CCNB1|CASP8|MMP9|HIF1A|TP53|VEGFA
14015	4.5197e-05	0.00024589	3	60	21	17956	positive regulation of gliogenesis	TGFB1|PPARG|RELA
48699	4.6983e-05	0.00025508	8	1245	21	17956	generation of neurons	JUN|TGFB1|CASP3|PPARG|HIF1A|TP53|RELA|VEGFA
51052	4.7288e-05	0.00025621	5	357	21	17956	regulation of DNA metabolic process	TGFB1|CDK2|AKT1|PPARG|TP53
7265	4.8975e-05	0.00026481	4	178	21	17956	Ras protein signal transduction	CCNA2|JUN|CDK2|TP53
51098	4.9863e-05	0.00026906	5	361	21	17956	regulation of binding	JUN|TGFB1|AKT1|PPARG|MMP9
1904951	5.0524e-05	0.00027151	5	362	21	17956	positive regulation of establishment of protein localization	TGFB1|CASP8|PTGS2|HIF1A|TP53
45862	5.0524e-05	0.00027151	5	362	21	17956	positive regulation of proteolysis	CASP9|CASP8|CYCS|AKT1|PPARG
90316	5.1155e-05	0.00027435	4	180	21	17956	positive regulation of intracellular protein transport	TGFB1|CASP8|PTGS2|TP53
50727	5.1865e-05	0.00027759	5	364	21	17956	regulation of inflammatory response	PPARG|PTGS2|MMP9|ESR1|RELA
31571	5.2331e-05	0.00027952	3	63	21	17956	mitotic G1 DNA damage checkpoint	CCNB1|CDK2|TP53
31400	5.2605e-05	0.00028042	6	610	21	17956	negative regulation of protein modification process	JUN|CCNB1|TGFB1|CASP3|AKT1|RELA
44783	5.4863e-05	0.00029128	3	64	21	17956	G1 DNA damage checkpoint	CCNB1|CDK2|TP53
44819	5.4863e-05	0.00029128	3	64	21	17956	mitotic G1/S transition checkpoint	CCNB1|CDK2|TP53
44237	5.5316e-05	0.0002931	18	7611	21	17956	cellular metabolic process	JUN|TGFB1|FOS|PTGS2|HIF1A|ESR1|RELA|CCNA2|AR|CCNB1|CASP8|CASP3|CDK2|CYCS|AKT1|PGR|PPARG|TP53
46824	5.7475e-05	0.00030393	3	65	21	17956	positive regulation of nucleocytoplasmic transport	TGFB1|PTGS2|TP53
22408	5.8122e-05	0.00030674	4	186	21	17956	negative regulation of cell-cell adhesion	TGFB1|CASP3|AKT1|VEGFA
45899	5.8293e-05	0.00030702	2	10	21	17956	positive regulation of RNA polymerase II transcription preinitiation complex assembly	ESR1|TP53
50794	5.9107e-05	0.00031069	21	11298	21	17956	regulation of cellular process	JUN|TGFB1|FOS|PTGS2|MMP9|HIF1A|ESR1|RELA|VEGFA|CASP9|CCNA2|AR|CCNB1|CASP8|CASP3|CDK2|CYCS|AKT1|PGR|PPARG|TP53
7399	6.0744e-05	0.00031867	10	2154	21	17956	nervous system development	JUN|TGFB1|CASP3|AKT1|PPARG|FOS|HIF1A|TP53|RELA|VEGFA
32880	6.1154e-05	0.00032018	7	933	21	17956	regulation of protein localization	AR|TGFB1|CASP8|AKT1|PTGS2|HIF1A|TP53
1905330	6.2939e-05	0.00032823	3	67	21	17956	regulation of morphogenesis of an epithelium	AR|ESR1|VEGFA
1776	6.2939e-05	0.00032823	3	67	21	17956	leukocyte homeostasis	CASP3|AKT1|HIF1A
7178	6.4439e-05	0.00033539	4	191	21	17956	transmembrane receptor protein serine/threonine kinase signaling pathway	JUN|TGFB1|FOS|TP53
45600	6.5795e-05	0.0003411	3	68	21	17956	positive regulation of fat cell differentiation	AKT1|PPARG|PTGS2
42698	6.5795e-05	0.0003411	3	68	21	17956	ovulation cycle	CASP3|PGR|ESR1
10952	6.7101e-05	0.00034719	4	193	21	17956	positive regulation of peptidase activity	CASP9|CASP8|CYCS|PPARG
1903706	6.7684e-05	0.00034952	5	385	21	17956	regulation of hemopoiesis	JUN|TGFB1|CASP8|FOS|HIF1A
75	6.9842e-05	0.00035996	4	195	21	17956	cell cycle checkpoint	CCNB1|TGFB1|CDK2|TP53
51974	7.1197e-05	0.00036505	2	11	21	17956	negative regulation of telomerase activity	PPARG|TP53
60736	7.1197e-05	0.00036505	2	11	21	17956	prostate gland growth	AR|ESR1
51146	7.1243e-05	0.00036505	4	196	21	17956	striated muscle cell differentiation	CCNB1|CASP3|AKT1|VEGFA
43434	7.3711e-05	0.00037697	5	392	21	17956	response to peptide hormone	CCNA2|AKT1|PPARG|PTGS2|RELA
2064	7.4106e-05	0.00037825	4	198	21	17956	epithelial cell development	AR|PGR|HIF1A|ESR1
72091	7.4867e-05	0.00037994	3	71	21	17956	regulation of stem cell proliferation	HIF1A|TP53|VEGFA
72401	7.4867e-05	0.00037994	3	71	21	17956	signal transduction involved in DNA integrity checkpoint	CCNB1|CDK2|TP53
72422	7.4867e-05	0.00037994	3	71	21	17956	signal transduction involved in DNA damage checkpoint	CCNB1|CDK2|TP53
45685	7.8063e-05	0.00039389	3	72	21	17956	regulation of glial cell differentiation	TGFB1|PPARG|RELA
72395	7.8063e-05	0.00039389	3	72	21	17956	signal transduction involved in cell cycle checkpoint	CCNB1|CDK2|TP53
3151	7.8063e-05	0.00039389	3	72	21	17956	outflow tract morphogenesis	JUN|HIF1A|VEGFA
32879	7.9734e-05	0.00040156	11	2734	21	17956	regulation of localization	AR|JUN|TGFB1|CASP8|AKT1|PPARG|PTGS2|MMP9|HIF1A|TP53|VEGFA
51049	8.3398e-05	0.00041921	9	1768	21	17956	regulation of transport	TGFB1|CASP8|AKT1|PPARG|PTGS2|MMP9|HIF1A|TP53|VEGFA
43401	8.4721e-05	0.0004246	3	74	21	17956	steroid hormone mediated signaling pathway	AR|PGR|ESR1
48872	8.4791e-05	0.0004246	4	205	21	17956	homeostasis of number of cells	CASP3|AKT1|HIF1A|VEGFA
70243	8.5376e-05	0.00042591	2	12	21	17956	regulation of thymocyte apoptotic process	HIF1A|TP53
1903800	8.5376e-05	0.00042591	2	12	21	17956	positive regulation of production of miRNAs involved in gene silencing by miRNA	TGFB1|TP53
6109	8.6405e-05	0.00043023	4	206	21	17956	regulation of carbohydrate metabolic process	TGFB1|AKT1|HIF1A|TP53
1558	8.8024e-05	0.00043745	5	407	21	17956	regulation of cell growth	TGFB1|AKT1|PPARG|TP53|VEGFA
6970	8.8185e-05	0.00043745	3	75	21	17956	response to osmotic stress	CASP3|PTGS2|TP53
43627	9.5387e-05	0.00047141	3	77	21	17956	response to estrogen	AR|PPARG|ESR1
61418	9.5387e-05	0.00047141	3	77	21	17956	regulation of transcription from RNA polymerase II promoter in response to hypoxia	HIF1A|TP53|VEGFA
80135	9.6152e-05	0.0004743	6	680	21	17956	regulation of cellular response to stress	CASP9|AKT1|PTGS2|HIF1A|TP53|VEGFA
1933	9.7587e-05	0.00048048	5	416	21	17956	negative regulation of protein phosphorylation	JUN|CCNB1|TGFB1|CASP3|AKT1
71260	9.9128e-05	0.00048717	3	78	21	17956	cellular response to mechanical stimulus	CASP8|AKT1|PTGS2
71216	0.00010013	0.00049117	4	214	21	17956	cellular response to biotic stimulus	TGFB1|AKT1|TP53|RELA
45898	0.00010083	0.00049368	2	13	21	17956	regulation of RNA polymerase II transcription preinitiation complex assembly	ESR1|TP53
71158	0.00010296	0.00050228	3	79	21	17956	positive regulation of cell cycle arrest	CCNB1|CDK2|TP53
30330	0.00010296	0.00050228	3	79	21	17956	DNA damage response, signal transduction by p53 class mediator	CCNB1|CDK2|TP53
32101	0.0001036	0.00050448	7	1014	21	17956	regulation of response to external stimulus	TGFB1|PPARG|PTGS2|MMP9|ESR1|RELA|VEGFA
33273	0.00010689	0.00051954	3	80	21	17956	response to vitamin	PPARG|PTGS2|RELA
6325	0.00011019	0.00053455	6	697	21	17956	chromatin organization	CCNA2|CCNB1|CDK2|ESR1|TP53|RELA
22407	0.00011404	0.00055222	5	430	21	17956	regulation of cell-cell adhesion	TGFB1|CASP3|AKT1|RELA|VEGFA
32388	0.00011538	0.00055769	4	222	21	17956	positive regulation of intracellular transport	TGFB1|CASP8|PTGS2|TP53
70141	0.00011755	0.00056509	2	14	21	17956	response to UV-A	AKT1|MMP9
45651	0.00011755	0.00056509	2	14	21	17956	positive regulation of macrophage differentiation	TGFB1|CASP8
10763	0.00011755	0.00056509	2	14	21	17956	positive regulation of fibroblast migration	TGFB1|AKT1
2684	0.00012223	0.00058653	7	1041	21	17956	positive regulation of immune system process	JUN|TGFB1|CASP8|AKT1|FOS|RELA|VEGFA
1819	0.0001284	0.00061501	5	441	21	17956	positive regulation of cytokine production	TGFB1|CASP8|PTGS2|HIF1A|RELA
1900182	0.00013255	0.00063375	3	86	21	17956	positive regulation of protein localization to nucleus	TGFB1|AKT1|PTGS2
2070	0.00013554	0.00064686	2	15	21	17956	epithelial cell maturation	PGR|HIF1A
1892	0.00013718	0.00065353	3	87	21	17956	embryonic placenta development	CASP8|AKT1|HIF1A
51346	0.00014412	0.00068532	5	452	21	17956	negative regulation of hydrolase activity	AKT1|PTGS2|MMP9|TP53|VEGFA
42326	0.00015173	0.00072024	5	457	21	17956	negative regulation of phosphorylation	JUN|CCNB1|TGFB1|CASP3|AKT1
71380	0.00015479	0.00072857	2	16	21	17956	cellular response to prostaglandin E stimulus	AKT1|PPARG
71391	0.00015479	0.00072857	2	16	21	17956	cellular response to estrogen stimulus	AR|ESR1
71732	0.00015479	0.00072857	2	16	21	17956	cellular response to nitric oxide	CCNA2|CDK2
60644	0.00015479	0.00072857	2	16	21	17956	mammary gland epithelial cell differentiation	AKT1|HIF1A
7005	0.00015486	0.00072857	5	459	21	17956	mitochondrion organization	JUN|CASP8|CYCS|AKT1|TP53
42692	0.00015578	0.00073027	4	240	21	17956	muscle cell differentiation	CCNB1|CASP3|AKT1|VEGFA
31668	0.00015578	0.00073027	4	240	21	17956	cellular response to extracellular stimulus	JUN|PPARG|FOS|TP53
14013	0.00015676	0.00073227	3	91	21	17956	regulation of gliogenesis	TGFB1|PPARG|RELA
31058	0.00015676	0.00073227	3	91	21	17956	positive regulation of histone modification	CCNB1|TP53|VEGFA
2000177	0.00016192	0.00075505	3	92	21	17956	regulation of neural precursor cell proliferation	HIF1A|TP53|VEGFA
45926	0.00016339	0.00076057	4	243	21	17956	negative regulation of growth	TGFB1|PPARG|HIF1A|TP53
50789	0.00016631	0.0007728	21	11868	21	17956	regulation of biological process	JUN|TGFB1|FOS|PTGS2|MMP9|HIF1A|ESR1|RELA|VEGFA|CASP9|CCNA2|AR|CCNB1|CASP8|CASP3|CDK2|CYCS|AKT1|PGR|PPARG|TP53
51591	0.00016719	0.00077553	3	93	21	17956	response to cAMP	JUN|FOS|RELA
10951	0.00017396	0.0008055	4	247	21	17956	negative regulation of endopeptidase activity	AKT1|PTGS2|MMP9|VEGFA
31065	0.00017531	0.00080892	2	17	21	17956	positive regulation of histone deacetylation	TP53|VEGFA
2001267	0.00017531	0.00080892	2	17	21	17956	regulation of cysteine-type endopeptidase activity involved in apoptotic signaling pathway	CASP8|MMP9
31334	0.00017942	0.00082647	4	249	21	17956	positive regulation of protein-containing complex assembly	TGFB1|ESR1|TP53|VEGFA
62014	0.00018939	0.00086936	3	97	21	17956	negative regulation of small molecule metabolic process	TGFB1|AKT1|TP53
19217	0.00018939	0.00086936	3	97	21	17956	regulation of fatty acid metabolic process	AKT1|PPARG|PTGS2
33157	0.00019363	0.00088727	4	254	21	17956	regulation of intracellular protein transport	TGFB1|CASP8|PTGS2|TP53
44773	0.00019523	0.00089304	3	98	21	17956	mitotic DNA damage checkpoint	CCNB1|CDK2|TP53
6974	0.00019569	0.00089361	6	774	21	17956	cellular response to DNA damage stimulus	CASP9|CCNB1|CASP3|CDK2|AKT1|TP53
30728	0.00019708	0.00089533	2	18	21	17956	ovulation	PGR|PTGS2
43117	0.00019708	0.00089533	2	18	21	17956	positive regulation of vascular permeability	TGFB1|VEGFA
60571	0.00019708	0.00089533	2	18	21	17956	morphogenesis of an epithelial fold	AR|HIF1A
10466	0.00019953	0.00090492	4	256	21	17956	negative regulation of peptidase activity	AKT1|PTGS2|MMP9|VEGFA
7264	0.00021803	0.00098711	4	262	21	17956	small GTPase mediated signal transduction	CCNA2|JUN|CDK2|TP53
1903076	0.00021973	0.00098874	3	102	21	17956	regulation of protein localization to plasma membrane	AR|TGFB1|AKT1
1902004	0.00022011	0.00098874	2	19	21	17956	positive regulation of amyloid-beta formation	CASP3|RELA
30220	0.00022011	0.00098874	2	19	21	17956	platelet formation	CASP9|CASP3
1902170	0.00022011	0.00098874	2	19	21	17956	cellular response to reactive nitrogen species	CCNA2|CDK2
45859	0.00022026	0.00098874	6	791	21	17956	regulation of protein kinase activity	CCNA2|CCNB1|TGFB1|CASP3|AKT1|VEGFA
3018	0.00022123	0.0009914	4	263	21	17956	vascular process in circulatory system	TGFB1|AKT1|PTGS2|VEGFA
2000134	0.00022615	0.0010117	3	103	21	17956	negative regulation of G1/S transition of mitotic cell cycle	CCNB1|CDK2|TP53
1905269	0.00023936	0.0010654	3	105	21	17956	positive regulation of chromatin organization	CCNB1|TP53|VEGFA
71156	0.00023936	0.0010654	3	105	21	17956	regulation of cell cycle arrest	CCNB1|CDK2|TP53
44774	0.00023936	0.0010654	3	105	21	17956	mitotic DNA integrity checkpoint	CCNB1|CDK2|TP53
14706	0.00024114	0.0010715	4	269	21	17956	striated muscle tissue development	CCNB1|TGFB1|FOS|VEGFA
1902176	0.0002444	0.001077	2	20	21	17956	negative regulation of oxidative stress-induced intrinsic apoptotic signaling pathway	AKT1|HIF1A
30520	0.0002444	0.001077	2	20	21	17956	intracellular estrogen receptor signaling pathway	AR|ESR1
71731	0.0002444	0.001077	2	20	21	17956	response to nitric oxide	CCNA2|CDK2
31293	0.0002444	0.001077	2	20	21	17956	membrane protein intracellular domain proteolysis	TGFB1|RELA
36344	0.0002444	0.001077	2	20	21	17956	platelet morphogenesis	CASP9|CASP3
1902807	0.00024614	0.0010829	3	106	21	17956	negative regulation of cell cycle G1/S phase transition	CCNB1|CDK2|TP53
71375	0.00024805	0.0010895	4	271	21	17956	cellular response to peptide hormone stimulus	CCNA2|AKT1|PPARG|RELA
45649	0.00026993	0.0011738	2	21	21	17956	regulation of macrophage differentiation	TGFB1|CASP8
62098	0.00026993	0.0011738	2	21	21	17956	regulation of programmed necrotic cell death	CASP8|TP53
71379	0.00026993	0.0011738	2	21	21	17956	cellular response to prostaglandin stimulus	AKT1|PPARG
2042	0.00026993	0.0011738	2	21	21	17956	cell migration involved in sprouting angiogenesis	AKT1|VEGFA
60740	0.00026993	0.0011738	2	21	21	17956	prostate gland epithelium morphogenesis	AR|ESR1
90050	0.00026993	0.0011738	2	21	21	17956	positive regulation of cell migration involved in sprouting angiogenesis	PTGS2|VEGFA
7169	0.00027186	0.0011803	5	518	21	17956	transmembrane receptor protein tyrosine kinase signaling pathway	TGFB1|CASP3|AKT1|MMP9|VEGFA
1902105	0.00027715	0.0012013	4	279	21	17956	regulation of leukocyte differentiation	JUN|TGFB1|CASP8|FOS
33043	0.00027965	0.0012101	7	1189	21	17956	regulation of organelle organization	CCNB1|CASP8|AKT1|MMP9|HIF1A|TP53|VEGFA
46822	0.00028195	0.0012181	3	111	21	17956	regulation of nucleocytoplasmic transport	TGFB1|PTGS2|TP53
7162	0.00029259	0.001262	4	283	21	17956	negative regulation of cell adhesion	TGFB1|CASP3|AKT1|VEGFA
60537	0.00029655	0.0012715	4	284	21	17956	muscle tissue development	CCNB1|TGFB1|FOS|VEGFA
90312	0.00029671	0.0012715	2	22	21	17956	positive regulation of protein deacetylation	TP53|VEGFA
1836	0.00029671	0.0012715	2	22	21	17956	release of cytochrome c from mitochondria	JUN|TP53
35162	0.00029671	0.0012715	2	22	21	17956	embryonic hemopoiesis	HIF1A|VEGFA
90287	0.00030054	0.0012858	4	285	21	17956	regulation of cellular response to growth factor stimulus	TGFB1|PPARG|HIF1A|TP53
51348	0.00030457	0.0013005	4	286	21	17956	negative regulation of transferase activity	CASP3|AKT1|PPARG|TP53
42542	0.00030496	0.0013005	3	114	21	17956	response to hydrogen peroxide	JUN|CASP3|RELA
9611	0.00030753	0.0013094	5	532	21	17956	response to wounding	JUN|TGFB1|CASP3|HIF1A|VEGFA
90068	0.0003169	0.0013471	4	289	21	17956	positive regulation of cell cycle process	CCNB1|CDK2|AKT1|TP53
51000	0.00032474	0.0013738	2	23	21	17956	positive regulation of nitric-oxide synthase activity	AKT1|HIF1A
2052	0.00032474	0.0013738	2	23	21	17956	positive regulation of neuroblast proliferation	HIF1A|VEGFA
60512	0.00032474	0.0013738	2	23	21	17956	prostate gland morphogenesis	AR|ESR1
72331	0.00034596	0.0014612	3	119	21	17956	signal transduction by p53 class mediator	CCNB1|CDK2|TP53
45930	0.00035152	0.0014823	4	297	21	17956	negative regulation of mitotic cell cycle	CCNB1|TGFB1|CDK2|TP53
1782	0.00035402	0.0014857	2	24	21	17956	B cell homeostasis	CASP3|HIF1A
34695	0.00035402	0.0014857	2	24	21	17956	response to prostaglandin E	AKT1|PPARG
1902993	0.00035402	0.0014857	2	24	21	17956	positive regulation of amyloid precursor protein catabolic process	CASP3|RELA
51093	0.00036176	0.0015158	6	867	21	17956	negative regulation of developmental process	TGFB1|PPARG|MMP9|HIF1A|TP53|VEGFA
1904375	0.00036331	0.0015199	3	121	21	17956	regulation of protein localization to cell periphery	AR|TGFB1|AKT1
1990776	0.00038453	0.0016062	2	25	21	17956	response to angiotensin	PTGS2|RELA
1900740	0.00041628	0.0017306	2	26	21	17956	positive regulation of protein insertion into mitochondrial membrane involved in apoptotic signaling pathway	CASP8|TP53
1900739	0.00041628	0.0017306	2	26	21	17956	regulation of protein insertion into mitochondrial membrane involved in apoptotic signaling pathway	CASP8|TP53
10661	0.00041628	0.0017306	2	26	21	17956	positive regulation of muscle cell apoptotic process	PPARG|TP53
1905477	0.00041868	0.0017351	3	127	21	17956	positive regulation of protein localization to membrane	CASP8|AKT1|TP53
90101	0.00041868	0.0017351	3	127	21	17956	negative regulation of transmembrane receptor protein serine/threonine kinase signaling pathway	TGFB1|PPARG|TP53
3206	0.00042841	0.0017726	3	128	21	17956	cardiac chamber morphogenesis	TGFB1|HIF1A|TP53
43412	0.00043566	0.0017998	11	3286	21	17956	macromolecule modification	CCNA2|AR|CCNB1|TGFB1|CDK2|CYCS|AKT1|FOS|HIF1A|ESR1|TP53
50680	0.00043828	0.0018078	3	129	21	17956	negative regulation of epithelial cell proliferation	AR|TGFB1|PPARG
43549	0.00043942	0.0018097	6	899	21	17956	regulation of kinase activity	CCNA2|CCNB1|TGFB1|CASP3|AKT1|VEGFA
71902	0.00044456	0.001828	4	316	21	17956	positive regulation of protein serine/threonine kinase activity	CCNB1|TGFB1|AKT1|VEGFA
70423	0.00044927	0.0018416	2	27	21	17956	nucleotide-binding oligomerization domain containing signaling pathway	CASP8|RELA
35902	0.00044927	0.0018416	2	27	21	17956	response to immobilization stress	PPARG|FOS
48638	0.00046071	0.0018856	4	319	21	17956	regulation of developmental growth	AR|CCNB1|AKT1|VEGFA
7346	0.00048339	0.0019576	5	587	21	17956	regulation of mitotic cell cycle	CCNB1|TGFB1|CDK2|AKT1|TP53
90200	0.00048348	0.0019576	2	28	21	17956	positive regulation of release of cytochrome c from mitochondria	MMP9|TP53
70168	0.00048348	0.0019576	2	28	21	17956	negative regulation of biomineral tissue development	TGFB1|HIF1A
1902175	0.00048348	0.0019576	2	28	21	17956	regulation of oxidative stress-induced intrinsic apoptotic signaling pathway	AKT1|HIF1A
55094	0.00048348	0.0019576	2	28	21	17956	response to lipoprotein particle	AKT1|PPARG
31063	0.00048348	0.0019576	2	28	21	17956	regulation of histone deacetylation	TP53|VEGFA
35872	0.00048348	0.0019576	2	28	21	17956	nucleotide-binding domain, leucine rich repeat containing receptor signaling pathway	CASP8|RELA
1655	0.00050004	0.0020207	4	326	21	17956	urogenital system development	CASP9|AR|ESR1|VEGFA
1101	0.00050059	0.0020207	3	135	21	17956	response to acid chemical	CASP3|RELA|VEGFA
77	0.00051149	0.0020553	3	136	21	17956	DNA damage checkpoint	CCNB1|CDK2|TP53
7292	0.00051149	0.0020553	3	136	21	17956	female gamete generation	CCNB1|PGR|PTGS2
1900180	0.00051149	0.0020553	3	136	21	17956	regulation of protein localization to nucleus	TGFB1|AKT1|PTGS2
65008	0.00051262	0.0020567	12	3966	21	17956	regulation of biological quality	AR|JUN|TGFB1|CASP8|CASP3|AKT1|PPARG|PTGS2|HIF1A|ESR1|TP53|VEGFA
45737	0.00051893	0.0020663	2	29	21	17956	positive regulation of cyclin-dependent protein serine/threonine kinase activity	CCNB1|AKT1
2000637	0.00051893	0.0020663	2	29	21	17956	positive regulation of gene silencing by miRNA	TGFB1|TP53
10165	0.00051893	0.0020663	2	29	21	17956	response to X-ray	CASP3|TP53
60261	0.00051893	0.0020663	2	29	21	17956	positive regulation of transcription initiation from RNA polymerase II promoter	ESR1|TP53
110150	0.00051893	0.0020663	2	29	21	17956	negative regulation of biomineralization	TGFB1|HIF1A
65007	0.0005427	0.0021578	21	12555	21	17956	biological regulation	JUN|TGFB1|FOS|PTGS2|MMP9|HIF1A|ESR1|RELA|VEGFA|CASP9|CCNA2|AR|CCNB1|CASP8|CASP3|CDK2|CYCS|AKT1|PGR|PPARG|TP53
86	0.00054513	0.0021641	3	139	21	17956	G2/M transition of mitotic cell cycle	CCNA2|CCNB1|CDK2
51223	0.00055072	0.0021831	5	604	21	17956	regulation of protein transport	TGFB1|CASP8|PTGS2|HIF1A|TP53
71402	0.00055561	0.0021893	2	30	21	17956	cellular response to lipoprotein particle stimulus	AKT1|PPARG
71542	0.00055561	0.0021893	2	30	21	17956	dopaminergic neuron differentiation	HIF1A|VEGFA
60148	0.00055561	0.0021893	2	30	21	17956	positive regulation of posttranscriptional gene silencing	TGFB1|TP53
48147	0.00055561	0.0021893	2	30	21	17956	negative regulation of fibroblast proliferation	PPARG|TP53
44839	0.00056832	0.0022361	3	141	21	17956	cell cycle G2/M phase transition	CCNA2|CCNB1|CDK2
10506	0.00057935	0.0022761	4	339	21	17956	regulation of autophagy	CASP3|AKT1|HIF1A|TP53
10039	0.00059351	0.0023179	2	31	21	17956	response to iron ion	CCNB1|HIF1A
34694	0.00059351	0.0023179	2	31	21	17956	response to prostaglandin	AKT1|PPARG
43534	0.00059351	0.0023179	2	31	21	17956	blood vessel endothelial cell migration	AKT1|VEGFA
10939	0.00059351	0.0023179	2	31	21	17956	regulation of necrotic cell death	CASP8|TP53
35148	0.00060428	0.0023565	3	144	21	17956	tube formation	TGFB1|HIF1A|VEGFA
43271	0.00062905	0.0024454	3	146	21	17956	negative regulation of ion transport	AKT1|PTGS2|MMP9
31570	0.00062905	0.0024454	3	146	21	17956	DNA integrity checkpoint	CCNB1|CDK2|TP53
32770	0.00063263	0.0024454	2	32	21	17956	positive regulation of monooxygenase activity	AKT1|HIF1A
1902003	0.00063263	0.0024454	2	32	21	17956	regulation of amyloid-beta formation	CASP3|RELA
34405	0.00063263	0.0024454	2	32	21	17956	response to fluid shear stress	AKT1|PTGS2
43029	0.00063263	0.0024454	2	32	21	17956	T cell homeostasis	CASP3|AKT1
22603	0.00064447	0.0024876	6	966	21	17956	regulation of anatomical structure morphogenesis	AR|TGFB1|PPARG|HIF1A|ESR1|VEGFA
31056	0.00065445	0.0025224	3	148	21	17956	regulation of histone modification	CCNB1|TP53|VEGFA
70201	0.00066237	0.0025492	5	629	21	17956	regulation of establishment of protein localization	TGFB1|CASP8|PTGS2|HIF1A|TP53
1903047	0.00066716	0.0025565	5	630	21	17956	mitotic cell cycle process	CCNA2|CCNB1|TGFB1|CDK2|TP53
97193	0.0006674	0.0025565	3	149	21	17956	intrinsic apoptotic signaling pathway	CASP9|CASP3|TP53
45596	0.00067198	0.0025565	5	631	21	17956	negative regulation of cell differentiation	TGFB1|PPARG|MMP9|TP53|VEGFA
1904707	0.00067297	0.0025565	2	33	21	17956	positive regulation of vascular associated smooth muscle cell proliferation	JUN|MMP9
70232	0.00067297	0.0025565	2	33	21	17956	regulation of T cell apoptotic process	HIF1A|TP53
45907	0.00067297	0.0025565	2	33	21	17956	positive regulation of vasoconstriction	AKT1|PTGS2
30212	0.00067297	0.0025565	2	33	21	17956	hyaluronan metabolic process	TGFB1|AKT1
150077	0.00067297	0.0025565	2	33	21	17956	regulation of neuroinflammatory response	PTGS2|MMP9
1904031	0.00067297	0.0025565	2	33	21	17956	positive regulation of cyclin-dependent protein kinase activity	CCNB1|AKT1
90087	0.0006866	0.0026046	5	634	21	17956	regulation of peptide transport	TGFB1|CASP8|PTGS2|HIF1A|TP53
32386	0.00069613	0.0026369	4	356	21	17956	regulation of intracellular transport	TGFB1|CASP8|PTGS2|TP53
32965	0.00071452	0.0026797	2	34	21	17956	regulation of collagen biosynthetic process	TGFB1|PPARG
38034	0.00071452	0.0026797	2	34	21	17956	signal transduction in absence of ligand	CASP9|CASP3
71312	0.00071452	0.0026797	2	34	21	17956	cellular response to alkaloid	CCNA2|CASP3
10762	0.00071452	0.0026797	2	34	21	17956	regulation of fibroblast migration	TGFB1|AKT1
35633	0.00071452	0.0026797	2	34	21	17956	maintenance of blood-brain barrier	PTGS2|VEGFA
97192	0.00071452	0.0026797	2	34	21	17956	extrinsic apoptotic signaling pathway in absence of ligand	CASP9|CASP3
31663	0.00071452	0.0026797	2	34	21	17956	lipopolysaccharide-mediated signaling pathway	TGFB1|AKT1
1901030	0.00075729	0.0028122	2	35	21	17956	positive regulation of mitochondrial outer membrane permeabilization involved in apoptotic signaling pathway	CASP8|TP53
1905332	0.00075729	0.0028122	2	35	21	17956	positive regulation of morphogenesis of an epithelium	AR|VEGFA
46320	0.00075729	0.0028122	2	35	21	17956	regulation of fatty acid oxidation	AKT1|PPARG
71470	0.00075729	0.0028122	2	35	21	17956	cellular response to osmotic stress	CASP3|PTGS2
43537	0.00075729	0.0028122	2	35	21	17956	negative regulation of blood vessel endothelial cell migration	TGFB1|PPARG
60260	0.00075729	0.0028122	2	35	21	17956	regulation of transcription initiation from RNA polymerase II promoter	ESR1|TP53
16242	0.00075729	0.0028122	2	35	21	17956	negative regulation of macroautophagy	AKT1|TP53
48738	0.00076263	0.002828	3	156	21	17956	cardiac muscle tissue development	CCNB1|TGFB1|VEGFA
48589	0.00076431	0.0028303	4	365	21	17956	developmental growth	AR|CCNB1|ESR1|TP53
1893	0.00080128	0.0029589	2	36	21	17956	maternal placenta development	AKT1|PTGS2
43491	0.00080128	0.0029589	2	36	21	17956	protein kinase B signaling	TGFB1|AKT1
40007	0.00080417	0.0029654	4	370	21	17956	growth	AR|CCNB1|ESR1|TP53
7584	0.00082074	0.0030223	3	160	21	17956	response to nutrient	PPARG|PTGS2|RELA
71634	0.00084647	0.0031127	2	37	21	17956	regulation of transforming growth factor beta production	PTGS2|HIF1A
48863	0.00085082	0.0031244	3	162	21	17956	stem cell differentiation	HIF1A|ESR1|TP53
1959	0.00086612	0.0031762	3	163	21	17956	regulation of cytokine-mediated signaling pathway	CASP8|PPARG|HIF1A
70647	0.00086781	0.003178	6	1022	21	17956	protein modification by small protein conjugation or removal	CCNA2|AR|AKT1|HIF1A|ESR1|TP53
32885	0.00089286	0.0032402	2	38	21	17956	regulation of polysaccharide biosynthetic process	TGFB1|AKT1
45742	0.00089286	0.0032402	2	38	21	17956	positive regulation of epidermal growth factor receptor signaling pathway	AKT1|MMP9
71392	0.00089286	0.0032402	2	38	21	17956	cellular response to estradiol stimulus	CCNA2|ESR1
30850	0.00089286	0.0032402	2	38	21	17956	prostate gland development	AR|ESR1
2753	0.00089286	0.0032402	2	38	21	17956	cytoplasmic pattern recognition receptor signaling pathway	CASP8|RELA
90049	0.00089286	0.0032402	2	38	21	17956	regulation of cell migration involved in sprouting angiogenesis	PTGS2|VEGFA
31347	0.00089338	0.0032402	5	672	21	17956	regulation of defense response	PPARG|PTGS2|MMP9|ESR1|RELA
2001252	0.00091308	0.0033071	3	166	21	17956	positive regulation of chromosome organization	CCNB1|TP53|VEGFA
45787	0.00092362	0.0033407	4	384	21	17956	positive regulation of cell cycle	CCNB1|CDK2|AKT1|TP53
16043	0.00092785	0.0033514	14	5632	21	17956	cellular component organization	JUN|TGFB1|MMP9|ESR1|RELA|VEGFA|CCNA2|CCNB1|CASP8|CASP3|CDK2|CYCS|AKT1|TP53
45740	0.00094046	0.0033648	2	39	21	17956	positive regulation of DNA replication	JUN|CDK2
33619	0.00094046	0.0033648	2	39	21	17956	membrane protein proteolysis	TGFB1|RELA
45923	0.00094046	0.0033648	2	39	21	17956	positive regulation of fatty acid metabolic process	PPARG|PTGS2
2000279	0.00094046	0.0033648	2	39	21	17956	negative regulation of DNA biosynthetic process	PPARG|TP53
1902991	0.00094046	0.0033648	2	39	21	17956	regulation of amyloid precursor protein catabolic process	CASP3|RELA
10712	0.00094046	0.0033648	2	39	21	17956	regulation of collagen metabolic process	TGFB1|PPARG
7566	0.00094046	0.0033648	2	39	21	17956	embryo implantation	PTGS2|MMP9
2000241	0.00094526	0.0033774	3	168	21	17956	regulation of reproductive process	AR|ESR1|VEGFA
48639	0.00096162	0.0034312	3	169	21	17956	positive regulation of developmental growth	CCNB1|AKT1|VEGFA
3205	0.00097816	0.0034855	3	170	21	17956	cardiac chamber development	TGFB1|HIF1A|TP53
45429	0.00098926	0.0035062	2	40	21	17956	positive regulation of nitric oxide biosynthetic process	AKT1|PTGS2
33146	0.00098926	0.0035062	2	40	21	17956	regulation of intracellular estrogen receptor signaling pathway	AR|ESR1
1901186	0.00098926	0.0035062	2	40	21	17956	positive regulation of ERBB signaling pathway	AKT1|MMP9
42307	0.00098926	0.0035062	2	40	21	17956	positive regulation of protein import into nucleus	TGFB1|PTGS2
51099	0.00099488	0.0035214	3	171	21	17956	positive regulation of binding	TGFB1|PPARG|MMP9
9057	0.001005	0.0035478	6	1051	21	17956	macromolecule catabolic process	CCNB1|TGFB1|CASP8|CASP3|CDK2|AKT1
51276	0.001005	0.0035478	6	1051	21	17956	chromosome organization	CCNA2|CCNB1|CDK2|ESR1|TP53|RELA
2683	0.0010067	0.0035491	4	393	21	17956	negative regulation of immune system process	TGFB1|CASP3|AKT1|PPARG
38095	0.0010118	0.0035621	3	172	21	17956	Fc-epsilon receptor signaling pathway	JUN|FOS|RELA
1903146	0.0010393	0.0036491	2	41	21	17956	regulation of autophagy of mitochondrion	HIF1A|TP53
1904407	0.0010393	0.0036491	2	41	21	17956	positive regulation of nitric oxide metabolic process	AKT1|PTGS2
51129	0.0010461	0.0036635	5	696	21	17956	negative regulation of cellular component organization	AR|TGFB1|AKT1|TP53|VEGFA
60759	0.0010461	0.0036635	3	174	21	17956	regulation of response to cytokine stimulus	CASP8|PPARG|HIF1A
43408	0.0010529	0.0036823	5	697	21	17956	regulation of MAPK cascade	AR|JUN|TGFB1|AKT1|VEGFA
19216	0.0010551	0.0036853	4	398	21	17956	regulation of lipid metabolic process	TGFB1|AKT1|PPARG|PTGS2
30857	0.0010905	0.0037986	2	42	21	17956	negative regulation of epithelial cell differentiation	MMP9|VEGFA
1904591	0.0010905	0.0037986	2	42	21	17956	positive regulation of protein import	TGFB1|PTGS2
7276	0.0011152	0.0038798	5	706	21	17956	gamete generation	AR|CCNB1|AKT1|PGR|PTGS2
278	0.001151	0.0039341	5	711	21	17956	mitotic cell cycle	CCNA2|CCNB1|TGFB1|CDK2|TP53
1901796	0.0011536	0.0039341	3	180	21	17956	regulation of signal transduction by p53 class mediator	CDK2|AKT1|TP53
1667	0.0011536	0.0039341	3	180	21	17956	ameboidal-type cell migration	AKT1|HIF1A|VEGFA
30155	0.0011656	0.0039341	5	713	21	17956	regulation of cell adhesion	TGFB1|CASP3|AKT1|RELA|VEGFA
1905313	0.0011695	0.0039341	1	1	21	17956	transforming growth factor beta receptor signaling pathway involved in heart development	TGFB1
1905856	0.0011695	0.0039341	1	1	21	17956	negative regulation of pentose-phosphate shunt	TP53
2000230	0.0011695	0.0039341	1	1	21	17956	negative regulation of pancreatic stellate cell proliferation	PPARG
46680	0.0011695	0.0039341	1	1	21	17956	response to DDT	CCNB1
100002	0.0011695	0.0039341	1	1	21	17956	negative regulation of protein kinase activity by protein phosphorylation	AKT1
14006	0.0011695	0.0039341	1	1	21	17956	regulation of microglia differentiation	TGFB1
14008	0.0011695	0.0039341	1	1	21	17956	positive regulation of microglia differentiation	TGFB1
71471	0.0011695	0.0039341	1	1	21	17956	cellular response to non-ionic osmotic stress	PTGS2
2000775	0.0011695	0.0039341	1	1	21	17956	histone H3-S10 phosphorylation involved in chromosome condensation	CCNB1
6117	0.0011695	0.0039341	1	1	21	17956	acetaldehyde metabolic process	RELA
10335	0.0011695	0.0039341	1	1	21	17956	response to non-ionic osmotic stress	PTGS2
39513	0.0011695	0.0039341	1	1	21	17956	suppression by virus of host catalytic activity	CASP8
39516	0.0011695	0.0039341	1	1	21	17956	modulation by virus of host catalytic activity	CASP8
19102	0.0011695	0.0039341	1	1	21	17956	male somatic sex determination	AR
39650	0.0011695	0.0039341	1	1	21	17956	suppression by virus of host cysteine-type endopeptidase activity involved in apoptotic process	CASP8
52053	0.0011695	0.0039341	1	1	21	17956	negative regulation by symbiont of host catalytic activity	CASP8
52148	0.0011695	0.0039341	1	1	21	17956	modulation by symbiont of host catalytic activity	CASP8
1903572	0.0011695	0.0039341	1	1	21	17956	positive regulation of protein kinase D signaling	VEGFA
1903570	0.0011695	0.0039341	1	1	21	17956	regulation of protein kinase D signaling	VEGFA
60520	0.0011695	0.0039341	1	1	21	17956	activation of prostate induction by androgen receptor signaling pathway	AR
32298	0.0011695	0.0039341	1	1	21	17956	positive regulation of DNA-dependent DNA replication initiation	CDK2
1990248	0.0011695	0.0039341	1	1	21	17956	regulation of transcription from RNA polymerase II promoter in response to DNA damage	TP53
1901990	0.001178	0.0039575	4	410	21	17956	regulation of mitotic cell cycle phase transition	CCNB1|CDK2|AKT1|TP53
6464	0.0011883	0.0039822	10	3071	21	17956	cellular protein modification process	CCNA2|AR|CCNB1|TGFB1|CDK2|CYCS|AKT1|HIF1A|ESR1|TP53
36211	0.0011883	0.0039822	10	3071	21	17956	protein modification process	CCNA2|AR|CCNB1|TGFB1|CDK2|CYCS|AKT1|HIF1A|ESR1|TP53
32881	0.0011964	0.0039941	2	44	21	17956	regulation of polysaccharide metabolic process	TGFB1|AKT1
1905953	0.0011964	0.0039941	2	44	21	17956	negative regulation of lipid localization	AKT1|PPARG
2000648	0.0011964	0.0039941	2	44	21	17956	positive regulation of stem cell proliferation	HIF1A|VEGFA
71222	0.0012098	0.0040287	3	183	21	17956	cellular response to lipopolysaccharide	TGFB1|AKT1|RELA
30308	0.0012098	0.0040287	3	183	21	17956	negative regulation of cell growth	TGFB1|PPARG|TP53
10565	0.001229	0.0040862	3	184	21	17956	regulation of cellular ketone metabolic process	AKT1|PPARG|PTGS2
44267	0.0012302	0.0040862	11	3693	21	17956	cellular protein metabolic process	CCNA2|AR|CCNB1|TGFB1|CASP8|CDK2|CYCS|AKT1|HIF1A|ESR1|TP53
1817	0.0012482	0.0041249	5	724	21	17956	regulation of cytokine production	TGFB1|CASP8|PTGS2|HIF1A|RELA
18105	0.0012483	0.0041249	3	185	21	17956	peptidyl-serine phosphorylation	CCNB1|CDK2|AKT1
90311	0.0012512	0.0041249	2	45	21	17956	regulation of protein deacetylation	TP53|VEGFA
1901028	0.0012512	0.0041249	2	45	21	17956	regulation of mitochondrial outer membrane permeabilization involved in apoptotic signaling pathway	CASP8|TP53
35094	0.0012512	0.0041249	2	45	21	17956	response to nicotine	CASP3|RELA
7595	0.0012512	0.0041249	2	45	21	17956	lactation	HIF1A|VEGFA
34248	0.0012878	0.0042402	4	420	21	17956	regulation of cellular amide metabolic process	CASP3|AKT1|TP53|RELA
50999	0.0013071	0.0042781	2	46	21	17956	regulation of nitric-oxide synthase activity	AKT1|HIF1A
43114	0.0013071	0.0042781	2	46	21	17956	regulation of vascular permeability	TGFB1|VEGFA
43124	0.0013071	0.0042781	2	46	21	17956	negative regulation of I-kappaB kinase/NF-kappaB signaling	CASP8|ESR1
8217	0.0013074	0.0042781	3	188	21	17956	regulation of blood pressure	AR|PPARG|PTGS2
42593	0.0013074	0.0042781	3	188	21	17956	glucose homeostasis	AKT1|PPARG|HIF1A
33500	0.0013275	0.0043385	3	189	21	17956	carbohydrate homeostasis	AKT1|PPARG|HIF1A
71840	0.0013462	0.0043941	14	5824	21	17956	cellular component organization or biogenesis	JUN|TGFB1|MMP9|ESR1|RELA|VEGFA|CCNA2|CCNB1|CASP8|CASP3|CDK2|CYCS|AKT1|TP53
46622	0.0013643	0.0044314	2	47	21	17956	positive regulation of organ growth	CCNB1|AKT1
51402	0.0013643	0.0044314	2	47	21	17956	neuron apoptotic process	CASP3|TP53
1903202	0.0013643	0.0044314	2	47	21	17956	negative regulation of oxidative stress-induced cell death	AKT1|HIF1A
48806	0.0013643	0.0044314	2	47	21	17956	genitalia development	AR|ESR1
71219	0.0013682	0.0044388	3	191	21	17956	cellular response to molecule of bacterial origin	TGFB1|AKT1|RELA
50731	0.0013889	0.0045004	3	192	21	17956	positive regulation of peptidyl-tyrosine phosphorylation	TGFB1|TP53|VEGFA
2673	0.0014226	0.004587	2	48	21	17956	regulation of acute inflammatory response	PPARG|PTGS2
51972	0.0014226	0.004587	2	48	21	17956	regulation of telomerase activity	PPARG|TP53
31952	0.0014226	0.004587	2	48	21	17956	regulation of protein autophosphorylation	JUN|VEGFA
60711	0.0014226	0.004587	2	48	21	17956	labyrinthine layer development	CASP8|AKT1
1902275	0.0014309	0.004608	3	194	21	17956	regulation of chromatin organization	CCNB1|TP53|VEGFA
42060	0.0014782	0.0047546	4	436	21	17956	wound healing	TGFB1|CASP3|HIF1A|VEGFA
9056	0.001503	0.0048285	8	2057	21	17956	catabolic process	CCNB1|TGFB1|CASP8|CASP3|CDK2|AKT1|MMP9|TP53
7173	0.0015427	0.0049503	2	50	21	17956	epidermal growth factor receptor signaling pathway	TGFB1|AKT1
45912	0.0016046	0.0051425	2	51	21	17956	negative regulation of carbohydrate metabolic process	TGFB1|TP53
1901987	0.00162	0.0051855	4	447	21	17956	regulation of cell cycle phase transition	CCNB1|CDK2|AKT1|TP53
10596	0.0016676	0.0053186	2	52	21	17956	negative regulation of endothelial cell migration	TGFB1|PPARG
10823	0.0016676	0.0053186	2	52	21	17956	negative regulation of mitochondrion organization	AKT1|TP53
1903428	0.0016676	0.0053186	2	52	21	17956	positive regulation of reactive oxygen species biosynthetic process	AKT1|PTGS2
51054	0.0016758	0.0053384	3	205	21	17956	positive regulation of DNA metabolic process	TGFB1|CDK2|AKT1
43254	0.0016875	0.0053692	4	452	21	17956	regulation of protein-containing complex assembly	TGFB1|ESR1|TP53|VEGFA
42594	0.0016993	0.0054002	3	206	21	17956	response to starvation	JUN|PPARG|TP53
1901215	0.001723	0.0054689	3	207	21	17956	negative regulation of neuron death	JUN|AKT1|HIF1A
70228	0.0017318	0.0054836	2	53	21	17956	regulation of lymphocyte apoptotic process	HIF1A|TP53
1541	0.0017318	0.0054836	2	53	21	17956	ovarian follicle development	ESR1|VEGFA
18209	0.001771	0.0055945	3	209	21	17956	peptidyl-serine modification	CCNB1|CDK2|AKT1
31669	0.001771	0.0055945	3	209	21	17956	cellular response to nutrient levels	JUN|PPARG|TP53
55013	0.0017971	0.0056701	2	54	21	17956	cardiac muscle cell development	CCNB1|VEGFA
2000179	0.0018636	0.0058659	2	55	21	17956	positive regulation of neural precursor cell proliferation	HIF1A|VEGFA
2931	0.0018636	0.0058659	2	55	21	17956	response to ischemia	CASP9|TP53
1901991	0.0018695	0.0058706	3	213	21	17956	negative regulation of mitotic cell cycle phase transition	CCNB1|CDK2|TP53
1902749	0.0018695	0.0058706	3	213	21	17956	regulation of cell cycle G2/M phase transition	CCNB1|CDK2|TP53
42592	0.0019221	0.0060285	7	1639	21	17956	homeostatic process	CASP3|AKT1|PPARG|PTGS2|HIF1A|ESR1|VEGFA
51353	0.0019313	0.0060501	2	56	21	17956	positive regulation of oxidoreductase activity	AKT1|HIF1A
32768	0.0020001	0.0062435	2	57	21	17956	regulation of monooxygenase activity	AKT1|HIF1A
45428	0.0020001	0.0062435	2	57	21	17956	regulation of nitric oxide biosynthetic process	AKT1|PTGS2
70997	0.0020001	0.0062435	2	57	21	17956	neuron death	CASP3|TP53
2000378	0.0020701	0.0064391	2	58	21	17956	negative regulation of reactive oxygen species metabolic process	HIF1A|TP53
2040	0.0020701	0.0064391	2	58	21	17956	sprouting angiogenesis	AKT1|VEGFA
1903749	0.0020701	0.0064391	2	58	21	17956	positive regulation of establishment of protein localization to mitochondrion	CASP8|TP53
42306	0.0021412	0.0066447	2	59	21	17956	regulation of protein import into nucleus	TGFB1|PTGS2
55006	0.0021412	0.0066447	2	59	21	17956	cardiac cell development	CCNB1|VEGFA
1501	0.002167	0.006717	4	484	21	17956	skeletal system development	TGFB1|MMP9|HIF1A|TP53
51896	0.0021855	0.0067665	3	225	21	17956	regulation of protein kinase B signaling	TGFB1|AKT1|ESR1
19229	0.0022869	0.0069842	2	61	21	17956	regulation of vasoconstriction	AKT1|PTGS2
1901988	0.0022978	0.0069842	3	229	21	17956	negative regulation of cell cycle phase transition	CCNB1|CDK2|TP53
90362	0.0023377	0.0069842	1	2	21	17956	positive regulation of platelet-derived growth factor production	PTGS2
8627	0.0023377	0.0069842	1	2	21	17956	intrinsic apoptotic signaling pathway in response to osmotic stress	CASP3
45720	0.0023377	0.0069842	1	2	21	17956	negative regulation of integrin biosynthetic process	AR
1905604	0.0023377	0.0069842	1	2	21	17956	negative regulation of blood-brain barrier permeability	VEGFA
1901558	0.0023377	0.0069842	1	2	21	17956	response to metformin	PPARG
1901551	0.0023377	0.0069842	1	2	21	17956	negative regulation of endothelial cell development	VEGFA
38190	0.0023377	0.0069842	1	2	21	17956	VEGF-activated neuropilin signaling pathway	VEGFA
2000229	0.0023377	0.0069842	1	2	21	17956	regulation of pancreatic stellate cell proliferation	PPARG
71283	0.0023377	0.0069842	1	2	21	17956	cellular response to iron(III) ion	CCNB1
71306	0.0023377	0.0069842	1	2	21	17956	cellular response to vitamin E	PPARG
1902336	0.0023377	0.0069842	1	2	21	17956	positive regulation of retinal ganglion cell axon guidance	VEGFA
51365	0.0023377	0.0069842	1	2	21	17956	cellular response to potassium ion starvation	JUN
35026	0.0023377	0.0069842	1	2	21	17956	leading edge cell differentiation	JUN
18993	0.0023377	0.0069842	1	2	21	17956	somatic sex determination	AR
1903141	0.0023377	0.0069842	1	2	21	17956	negative regulation of establishment of endothelial barrier	VEGFA
39506	0.0023377	0.0069842	1	2	21	17956	modulation by virus of host molecular function	CASP8
39507	0.0023377	0.0069842	1	2	21	17956	suppression by virus of host molecular function	CASP8
52055	0.0023377	0.0069842	1	2	21	17956	modulation by symbiont of host molecular function	CASP8
52056	0.0023377	0.0069842	1	2	21	17956	negative regulation by symbiont of host molecular function	CASP8
60319	0.0023377	0.0069842	1	2	21	17956	primitive erythrocyte differentiation	VEGFA
97252	0.0023377	0.0069842	1	2	21	17956	oligodendrocyte apoptotic process	TP53
3169	0.0023377	0.0069842	1	2	21	17956	coronary vein morphogenesis	VEGFA
60599	0.0023377	0.0069842	1	2	21	17956	lateral sprouting involved in mammary gland duct morphogenesis	AR
97533	0.0023377	0.0069842	1	2	21	17956	cellular stress response to acid chemical	VEGFA
97532	0.0023377	0.0069842	1	2	21	17956	stress response to acid chemical	VEGFA
60694	0.0023377	0.0069842	1	2	21	17956	regulation of cholesterol transporter activity	PPARG
32227	0.0023377	0.0069842	1	2	21	17956	negative regulation of synaptic transmission, dopaminergic	PTGS2
1990144	0.0023377	0.0069842	1	2	21	17956	intrinsic apoptotic signaling pathway in response to hypoxia	TP53
1990402	0.0023377	0.0069842	1	2	21	17956	embryonic liver development	TGFB1
32963	0.0023615	0.0070312	2	62	21	17956	collagen metabolic process	MMP9|HIF1A
10660	0.0023615	0.0070312	2	62	21	17956	regulation of muscle cell apoptotic process	PPARG|TP53
1904589	0.0023615	0.0070312	2	62	21	17956	regulation of protein import	TGFB1|PTGS2
32103	0.0024039	0.0071495	4	498	21	17956	positive regulation of response to external stimulus	TGFB1|PTGS2|RELA|VEGFA
32868	0.0024136	0.0071704	3	233	21	17956	response to insulin	AKT1|PPARG|RELA
16310	0.0024193	0.0071791	6	1246	21	17956	phosphorylation	CCNA2|CCNB1|TGFB1|CDK2|CYCS|AKT1
9636	0.0024729	0.0073217	3	235	21	17956	response to toxic substance	CCNB1|FOS|PTGS2
1903320	0.0024729	0.0073217	3	235	21	17956	regulation of protein modification by small protein conjugation or removal	AKT1|HIF1A|RELA
38093	0.0025028	0.0074021	3	236	21	17956	Fc receptor signaling pathway	JUN|FOS|RELA
1903201	0.002592	0.0076573	2	65	21	17956	regulation of oxidative stress-induced cell death	AKT1|HIF1A
19953	0.0026283	0.0077557	5	857	21	17956	sexual reproduction	AR|CCNB1|AKT1|PGR|PTGS2
71356	0.0026873	0.0079212	3	242	21	17956	cellular response to tumor necrosis factor	AKT1|TP53|RELA
43410	0.0028115	0.0082696	4	520	21	17956	positive regulation of MAPK cascade	AR|JUN|TGFB1|VEGFA
43122	0.0028149	0.0082696	3	246	21	17956	regulation of I-kappaB kinase/NF-kappaB signaling	CASP8|ESR1|RELA
90092	0.0028149	0.0082696	3	246	21	17956	regulation of transmembrane receptor protein serine/threonine kinase signaling pathway	TGFB1|PPARG|TP53
1570	0.0028328	0.0083128	2	68	21	17956	vasculogenesis	TGFB1|VEGFA
44403	0.0028488	0.0083505	5	873	21	17956	symbiotic process	CCNA2|JUN|CASP8|TP53|RELA
45165	0.0028801	0.008433	3	248	21	17956	cell fate commitment	CASP3|PPARG|TP53
10633	0.0029153	0.0085171	2	69	21	17956	negative regulation of epithelial cell migration	TGFB1|PPARG
43542	0.0029153	0.0085171	2	69	21	17956	endothelial cell migration	AKT1|VEGFA
45860	0.0029507	0.008611	4	527	21	17956	positive regulation of protein kinase activity	CCNB1|TGFB1|AKT1|VEGFA
38127	0.0029989	0.0087325	2	70	21	17956	ERBB signaling pathway	TGFB1|AKT1
1837	0.0029989	0.0087325	2	70	21	17956	epithelial to mesenchymal transition	TGFB1|HIF1A
44089	0.0030117	0.0087602	4	530	21	17956	positive regulation of cellular component biogenesis	TGFB1|ESR1|TP53|VEGFA
19752	0.0030675	0.0089127	5	888	21	17956	carboxylic acid metabolic process	TGFB1|AKT1|PPARG|PTGS2|HIF1A
8630	0.0030837	0.0089301	2	71	21	17956	intrinsic apoptotic signaling pathway in response to DNA damage	CASP9|TP53
1903747	0.0030837	0.0089301	2	71	21	17956	regulation of establishment of protein localization to mitochondrion	CASP8|TP53
7589	0.0030837	0.0089301	2	71	21	17956	body fluid secretion	HIF1A|VEGFA
45927	0.0031501	0.0091026	3	256	21	17956	positive regulation of growth	CCNB1|AKT1|VEGFA
50730	0.0031501	0.0091026	3	256	21	17956	regulation of peptidyl-tyrosine phosphorylation	TGFB1|TP53|VEGFA
7249	0.0031695	0.0091387	2	72	21	17956	I-kappaB kinase/NF-kappaB signaling	AKT1|RELA
3208	0.0031695	0.0091387	2	72	21	17956	cardiac ventricle morphogenesis	TGFB1|HIF1A
46902	0.0032565	0.0093691	2	73	21	17956	regulation of mitochondrial membrane permeability	CASP8|TP53
31100	0.0032565	0.0093691	2	73	21	17956	animal organ regeneration	CCNA2|PPARG
6913	0.0032908	0.0094575	3	260	21	17956	nucleocytoplasmic transport	TGFB1|AKT1|TP53
1503	0.0033266	0.0095499	3	261	21	17956	ossification	TGFB1|AKT1|PTGS2
34103	0.0033446	0.0095809	2	74	21	17956	regulation of tissue remodeling	TGFB1|TP53
30500	0.0033446	0.0095809	2	74	21	17956	regulation of bone mineralization	TGFB1|HIF1A
51169	0.0033988	0.0097248	3	263	21	17956	nuclear transport	TGFB1|AKT1|TP53
1900407	0.0034338	0.0097248	2	75	21	17956	regulation of cellular response to oxidative stress	AKT1|HIF1A
90361	0.0035047	0.0097248	1	3	21	17956	regulation of platelet-derived growth factor production	PTGS2
70101	0.0035047	0.0097248	1	3	21	17956	positive regulation of chemokine-mediated signaling pathway	HIF1A
45726	0.0035047	0.0097248	1	3	21	17956	positive regulation of integrin biosynthetic process	AR
45918	0.0035047	0.0097248	1	3	21	17956	negative regulation of cytolysis	TGFB1
21502	0.0035047	0.0097248	1	3	21	17956	neural fold elevation formation	HIF1A
1901664	0.0035047	0.0097248	1	3	21	17956	regulation of NAD+ ADP-ribosyltransferase activity	TGFB1
1901666	0.0035047	0.0097248	1	3	21	17956	positive regulation of NAD+ ADP-ribosyltransferase activity	TGFB1
38086	0.0035047	0.0097248	1	3	21	17956	VEGF-activated platelet-derived growth factor receptor signaling pathway	VEGFA
38091	0.0035047	0.0097248	1	3	21	17956	positive regulation of cell proliferation by VEGF-activated platelet derived growth factor receptor signaling pathway	VEGFA
71314	0.0035047	0.0097248	1	3	21	17956	cellular response to cocaine	CCNA2
71373	0.0035047	0.0097248	1	3	21	17956	cellular response to luteinizing hormone stimulus	CCNA2
14040	0.0035047	0.0097248	1	3	21	17956	positive regulation of Schwann cell differentiation	RELA
1922	0.0035047	0.0097248	1	3	21	17956	B-1 B cell homeostasis	HIF1A
1902669	0.0035047	0.0097248	1	3	21	17956	positive regulation of axon guidance	VEGFA
1902689	0.0035047	0.0097248	1	3	21	17956	negative regulation of NAD metabolic process	TP53
43456	0.0035047	0.0097248	1	3	21	17956	regulation of pentose-phosphate shunt	TP53
19050	0.0035047	0.0097248	1	3	21	17956	suppression by virus of host apoptotic process	CASP8
1903392	0.0035047	0.0097248	1	3	21	17956	negative regulation of adherens junction organization	VEGFA
52199	0.0035047	0.0097248	1	3	21	17956	negative regulation of catalytic activity in other organism involved in symbiotic interaction	CASP8
72717	0.0035047	0.0097248	1	3	21	17956	cellular response to actinomycin D	TP53
60523	0.0035047	0.0097248	1	3	21	17956	prostate epithelial cord elongation	ESR1
60715	0.0035047	0.0097248	1	3	21	17956	syncytiotrophoblast cell differentiation involved in labyrinthine layer development	CASP8
60769	0.0035047	0.0097248	1	3	21	17956	positive regulation of epithelial cell proliferation involved in prostate gland development	AR
1904024	0.0035047	0.0097248	1	3	21	17956	negative regulation of glucose catabolic process to lactate via pyruvate	TP53
60948	0.0035047	0.0097248	1	3	21	17956	cardiac vascular smooth muscle cell development	VEGFA
110112	0.0035047	0.0097248	1	3	21	17956	regulation of lipid transporter activity	PPARG
1990418	0.0035047	0.0097248	1	3	21	17956	response to insulin-like growth factor stimulus	AKT1
6996	0.0035052	0.0097248	10	3524	21	17956	organelle organization	CCNA2|JUN|CCNB1|CASP8|CDK2|CYCS|AKT1|ESR1|TP53|RELA
33143	0.0035242	0.0097672	2	76	21	17956	regulation of intracellular steroid hormone receptor signaling pathway	AR|ESR1
30336	0.0035462	0.009818	3	267	21	17956	negative regulation of cell migration	TGFB1|AKT1|PPARG
904	0.0035779	0.0098954	4	556	21	17956	cell morphogenesis involved in differentiation	CASP9|AR|CASP3|VEGFA
7423	0.003601	0.0099489	4	557	21	17956	sensory organ development	CCNA2|JUN|HIF1A|VEGFA
6468	0.0036087	0.0099597	5	922	21	17956	protein phosphorylation	CCNA2|CCNB1|TGFB1|CDK2|AKT1
45913	0.0036156	0.0099684	2	77	21	17956	positive regulation of carbohydrate metabolic process	AKT1|HIF1A

## Sheet: Module1-CC
Cellular Component
GO-ID	p-value	corr p-value	x	n	X	N	Description	Genes in test set
70013	1.4306e-09	8.6789e-08	20	5956	21	18839	intracellular organelle lumen	JUN|TGFB1|FOS|PTGS2|MMP9|HIF1A|ESR1|RELA|VEGFA|CCNA2|AR|CCNB1|CASP8|CASP3|CDK2|CYCS|AKT1|PGR|PPARG|TP53
43233	1.4306e-09	8.6789e-08	20	5956	21	18839	organelle lumen	JUN|TGFB1|FOS|PTGS2|MMP9|HIF1A|ESR1|RELA|VEGFA|CCNA2|AR|CCNB1|CASP8|CASP3|CDK2|CYCS|AKT1|PGR|PPARG|TP53
31974	1.4306e-09	8.6789e-08	20	5956	21	18839	membrane-enclosed lumen	JUN|TGFB1|FOS|PTGS2|MMP9|HIF1A|ESR1|RELA|VEGFA|CCNA2|AR|CCNB1|CASP8|CASP3|CDK2|CYCS|AKT1|PGR|PPARG|TP53
5667	2.3871e-07	1.0861e-05	7	422	21	18839	transcription regulator complex	JUN|CDK2|PPARG|FOS|HIF1A|TP53|RELA
5829	5.6632e-07	2.0614e-05	17	5208	21	18839	cytosol	JUN|FOS|HIF1A|ESR1|RELA|CASP9|CCNA2|AR|CCNB1|CASP8|CASP3|CDK2|CYCS|AKT1|PGR|PPARG|TP53
228	8.2632e-07	2.2326e-05	10	1401	21	18839	nuclear chromosome	AR|JUN|CCNB1|PGR|PPARG|FOS|HIF1A|ESR1|TP53|RELA
5654	9.1651e-07	2.2326e-05	15	3937	21	18839	nucleoplasm	JUN|FOS|HIF1A|ESR1|RELA|CCNA2|AR|CCNB1|CASP8|CASP3|CDK2|AKT1|PGR|PPARG|TP53
32991	9.8136e-07	2.2326e-05	17	5395	21	18839	protein-containing complex	JUN|FOS|PTGS2|HIF1A|ESR1|RELA|CASP9|CCNA2|AR|CCNB1|CASP8|CASP3|CDK2|CYCS|AKT1|PPARG|TP53
5694	1.1404e-06	2.3061e-05	11	1856	21	18839	chromosome	AR|JUN|CCNB1|CDK2|PGR|PPARG|FOS|HIF1A|ESR1|TP53|RELA
5634	1.6746e-06	3.0477e-05	19	7422	21	18839	nucleus	JUN|TGFB1|FOS|PTGS2|HIF1A|ESR1|RELA|CASP9|CCNA2|AR|CCNB1|CASP8|CASP3|CDK2|CYCS|AKT1|PGR|PPARG|TP53
790	2.4986e-06	4.134e-05	9	1203	21	18839	nuclear chromatin	AR|JUN|PGR|PPARG|FOS|HIF1A|ESR1|TP53|RELA
35976	7.0913e-06	0.00010721	2	4	21	18839	transcription factor AP-1 complex	JUN|FOS
785	7.6582e-06	0.00010721	9	1378	21	18839	chromatin	AR|JUN|PGR|PPARG|FOS|HIF1A|ESR1|TP53|RELA
97124	1.1811e-05	0.00015025	2	5	21	18839	cyclin A2-CDK2 complex	CCNA2|CDK2
307	1.2383e-05	0.00015025	3	41	21	18839	cyclin-dependent protein kinase holoenzyme complex	CCNA2|CCNB1|CDK2
31981	1.4283e-05	0.00016247	15	4835	21	18839	nuclear lumen	JUN|FOS|HIF1A|ESR1|RELA|CCNA2|AR|CCNB1|CASP8|CASP3|CDK2|AKT1|PGR|PPARG|TP53
90575	3.9784e-05	0.00042592	4	177	21	18839	RNA polymerase II transcription regulator complex	JUN|PPARG|FOS|HIF1A
31264	4.2405e-05	0.00042876	2	9	21	18839	death-inducing signaling complex	CASP8|CASP3
5737	6.0334e-05	0.00057793	21	11865	21	18839	cytoplasm	JUN|TGFB1|FOS|PTGS2|MMP9|HIF1A|ESR1|RELA|VEGFA|CASP9|CCNA2|AR|CCNB1|CASP8|CASP3|CDK2|CYCS|AKT1|PGR|PPARG|TP53
1902554	8.6059e-05	0.00078314	3	78	21	18839	serine/threonine protein kinase complex	CCNA2|CCNB1|CDK2
1902911	0.00014523	0.0012586	3	93	21	18839	protein kinase complex	CCNA2|CCNB1|CDK2
43227	0.00022062	0.0018251	21	12620	21	18839	membrane-bounded organelle	JUN|TGFB1|FOS|PTGS2|MMP9|HIF1A|ESR1|RELA|VEGFA|CASP9|CCNA2|AR|CCNB1|CASP8|CASP3|CDK2|CYCS|AKT1|PGR|PPARG|TP53
43229	0.00035622	0.0028188	21	12911	21	18839	intracellular organelle	JUN|TGFB1|FOS|PTGS2|MMP9|HIF1A|ESR1|RELA|VEGFA|CASP9|CCNA2|AR|CCNB1|CASP8|CASP3|CDK2|CYCS|AKT1|PGR|PPARG|TP53
43232	0.00075255	0.0055126	13	5040	21	18839	intracellular non-membrane-bounded organelle	JUN|FOS|HIF1A|ESR1|RELA|AR|CCNB1|CASP8|CDK2|AKT1|PGR|PPARG|TP53
43228	0.00075723	0.0055126	13	5043	21	18839	non-membrane-bounded organelle	JUN|FOS|HIF1A|ESR1|RELA|AR|CCNB1|CASP8|CDK2|AKT1|PGR|PPARG|TP53
35525	0.0011147	0.007803	1	1	21	18839	NF-kappaB p50/p65 complex	RELA
43226	0.0013073	0.0088124	21	13735	21	18839	organelle	JUN|TGFB1|FOS|PTGS2|MMP9|HIF1A|ESR1|RELA|VEGFA|CASP9|CCNA2|AR|CCNB1|CASP8|CASP3|CDK2|CYCS|AKT1|PGR|PPARG|TP53

## Sheet: Module1-MF
Molecular Function
GO-ID	p-value	corr p-value	x	n	X	N	Description	Genes in test set
19899	3.2376e-11	8.2558e-09	16	2255	21	18200	enzyme binding	JUN|TGFB1|PTGS2|HIF1A|ESR1|RELA|CASP9|CCNA2|AR|CCNB1|CASP8|CASP3|AKT1|PGR|PPARG|TP53
19904	1.49e-09	1.8997e-07	10	695	21	18200	protein domain specific binding	CASP9|CCNA2|AR|JUN|CASP8|CDK2|PPARG|HIF1A|TP53|RELA
1224	1.3709e-08	7.0157e-07	4	24	21	18200	RNA polymerase II transcription cofactor binding	AR|PGR|ESR1|RELA
1228	1.3886e-08	7.0157e-07	8	429	21	18200	DNA-binding transcription activator activity, RNA polymerase II-specific	AR|JUN|PGR|FOS|HIF1A|ESR1|TP53|RELA
1216	1.4927e-08	7.0157e-07	8	433	21	18200	DNA-binding transcription activator activity	AR|JUN|PGR|FOS|HIF1A|ESR1|TP53|RELA
8134	1.6968e-08	7.0157e-07	9	646	21	18200	transcription factor binding	AR|JUN|PGR|PPARG|FOS|HIF1A|ESR1|TP53|RELA
1223	1.9259e-08	7.0157e-07	4	26	21	18200	transcription coactivator binding	AR|PGR|ESR1|RELA
1225	2.6419e-08	8.4212e-07	3	6	21	18200	RNA polymerase II transcription coactivator binding	AR|PGR|RELA
98772	7.1386e-08	2.0226e-06	16	3749	21	18200	molecular function regulator	JUN|TGFB1|FOS|HIF1A|ESR1|RELA|VEGFA|CASP9|CCNA2|AR|CCNB1|CASP3|AKT1|PGR|PPARG|TP53
97200	1.1071e-07	2.8232e-06	3	9	21	18200	cysteine-type endopeptidase activity involved in execution phase of apoptosis	CASP9|CASP8|CASP3
97199	1.5805e-07	3.6638e-06	3	10	21	18200	cysteine-type endopeptidase activity involved in apoptotic signaling pathway	CASP9|CASP8|CASP3
42802	2.3521e-07	4.9982e-06	12	1934	21	18200	identical protein binding	JUN|TGFB1|CASP8|AKT1|PGR|PPARG|PTGS2|MMP9|ESR1|TP53|RELA|VEGFA
98531	3.6968e-07	6.7334e-06	4	53	21	18200	ligand-activated transcription factor activity	AR|PGR|PPARG|ESR1
4879	3.6968e-07	6.7334e-06	4	53	21	18200	nuclear receptor activity	AR|PGR|PPARG|ESR1
19901	4.3034e-07	7.3157e-06	8	670	21	18200	protein kinase binding	CASP9|CCNA2|CCNB1|AKT1|HIF1A|ESR1|TP53|RELA
61629	4.6381e-07	7.392e-06	6	271	21	18200	RNA polymerase II-specific DNA-binding transcription factor binding	JUN|PPARG|FOS|HIF1A|ESR1|RELA
97153	5.9704e-07	8.9556e-06	3	15	21	18200	cysteine-type endopeptidase activity involved in apoptotic process	CASP9|CASP8|CASP3
1221	7.4639e-07	1.0574e-05	4	63	21	18200	transcription cofactor binding	AR|PGR|ESR1|RELA
19900	1.0848e-06	1.4245e-05	8	757	21	18200	kinase binding	CASP9|CCNA2|CCNB1|AKT1|HIF1A|ESR1|TP53|RELA
44389	1.1173e-06	1.4245e-05	6	315	21	18200	ubiquitin-like protein ligase binding	JUN|CCNB1|CASP8|HIF1A|TP53|RELA
1091	1.2677e-06	1.5394e-05	3	19	21	18200	RNA polymerase II general transcription initiation factor binding	AR|ESR1|TP53
33613	1.8603e-06	2.1176e-05	4	79	21	18200	activating transcription factor binding	JUN|PPARG|FOS|RELA
3682	1.9385e-06	2.1176e-05	7	557	21	18200	chromatin binding	AR|JUN|PPARG|FOS|ESR1|TP53|RELA
140297	1.993e-06	2.1176e-05	6	348	21	18200	DNA-binding transcription factor binding	JUN|PPARG|FOS|HIF1A|ESR1|RELA
978	3.5107e-06	3.581e-05	9	1211	21	18200	RNA polymerase II cis-regulatory region sequence-specific DNA binding	AR|JUN|PGR|PPARG|FOS|HIF1A|ESR1|TP53|RELA
987	4.0197e-06	3.9424e-05	9	1231	21	18200	cis-regulatory region sequence-specific DNA binding	AR|JUN|PGR|PPARG|FOS|HIF1A|ESR1|TP53|RELA
5102	5.5464e-06	5.2383e-05	10	1667	21	18200	signaling receptor binding	AR|CCNB1|TGFB1|CASP8|CASP3|PPARG|HIF1A|ESR1|TP53|VEGFA
1046	9.2241e-06	8.4005e-05	3	36	21	18200	core promoter sequence-specific DNA binding	FOS|TP53|RELA
981	1.1344e-05	9.9752e-05	9	1397	21	18200	DNA-binding transcription factor activity, RNA polymerase II-specific	AR|JUN|PGR|PPARG|FOS|HIF1A|ESR1|TP53|RELA
30234	1.2729e-05	0.0001082	8	1054	21	18200	enzyme regulator activity	CASP9|CCNA2|JUN|CCNB1|CASP3|AKT1|ESR1|TP53
977	1.4271e-05	0.00011739	9	1437	21	18200	RNA polymerase II transcription regulatory region sequence-specific DNA binding	AR|JUN|PGR|PPARG|FOS|HIF1A|ESR1|TP53|RELA
3700	1.5699e-05	0.0001251	9	1454	21	18200	DNA-binding transcription factor activity	AR|JUN|PGR|PPARG|FOS|HIF1A|ESR1|TP53|RELA
31625	1.8078e-05	0.00013657	5	296	21	18200	ubiquitin protein ligase binding	JUN|CASP8|HIF1A|TP53|RELA
140296	1.821e-05	0.00013657	3	45	21	18200	general transcription initiation factor binding	AR|ESR1|TP53
976	2.3198e-05	0.00016519	9	1526	21	18200	transcription regulatory region sequence-specific DNA binding	AR|JUN|PGR|PPARG|FOS|HIF1A|ESR1|TP53|RELA
1067	2.3321e-05	0.00016519	9	1527	21	18200	regulatory region nucleic acid binding	AR|JUN|PGR|PPARG|FOS|HIF1A|ESR1|TP53|RELA
16538	2.5059e-05	0.00017271	3	50	21	18200	cyclin-dependent protein serine/threonine kinase regulator activity	CCNA2|CCNB1|CASP3
30235	2.6536e-05	0.00017807	2	7	21	18200	nitric-oxide synthase regulator activity	AKT1|ESR1
1098	2.9884e-05	0.00019051	3	53	21	18200	basal transcription machinery binding	AR|ESR1|TP53
1099	2.9884e-05	0.00019051	3	53	21	18200	basal RNA polymerase II transcription machinery binding	AR|ESR1|TP53
1990837	3.1944e-05	0.00019868	9	1588	21	18200	sequence-specific double-stranded DNA binding	AR|JUN|PGR|PPARG|FOS|HIF1A|ESR1|TP53|RELA
3690	5.0066e-05	0.00030397	9	1680	21	18200	double-stranded DNA binding	AR|JUN|PGR|PPARG|FOS|HIF1A|ESR1|TP53|RELA
43565	5.2978e-05	0.00031417	9	1692	21	18200	sequence-specific DNA binding	AR|JUN|PGR|PPARG|FOS|HIF1A|ESR1|TP53|RELA
51117	0.0001274	0.00073833	3	86	21	18200	ATPase binding	AR|PGR|ESR1
140110	0.00017398	0.00098591	9	1969	21	18200	transcription regulator activity	AR|JUN|PGR|PPARG|FOS|HIF1A|ESR1|TP53|RELA
5126	0.00021323	0.0011626	4	264	21	18200	cytokine receptor binding	TGFB1|CASP8|CASP3|VEGFA
979	0.00021428	0.0011626	2	19	21	18200	RNA polymerase II core promoter sequence-specific DNA binding	FOS|RELA
5496	0.00025691	0.0013402	3	109	21	18200	steroid binding	AR|PGR|ESR1
8270	0.00026068	0.0013402	6	827	21	18200	zinc ion binding	AR|PGR|PPARG|MMP9|ESR1|TP53
5123	0.00026279	0.0013402	2	21	21	18200	death receptor binding	CASP8|CASP3
44877	0.00027521	0.0013648	7	1202	21	18200	protein-containing complex binding	JUN|CASP8|CASP3|FOS|MMP9|TP53|RELA
4197	0.00027831	0.0013648	3	112	21	18200	cysteine-type endopeptidase activity	CASP9|CASP8|CASP3
42826	0.00029319	0.0014106	3	114	21	18200	histone deacetylase binding	HIF1A|TP53|RELA
70412	0.00031616	0.001493	2	23	21	18200	R-SMAD binding	JUN|FOS
3707	0.00040528	0.001879	2	26	21	18200	steroid hormone receptor activity	PGR|ESR1
35035	0.00047072	0.0021435	2	28	21	18200	histone acetyltransferase binding	HIF1A|TP53
51721	0.00061595	0.0027131	2	32	21	18200	protein phosphatase 2A binding	AKT1|TP53
35257	0.0006171	0.0027131	3	147	21	18200	nuclear hormone receptor binding	PPARG|HIF1A|ESR1
19903	0.00065447	0.0028286	3	150	21	18200	protein phosphatase binding	AKT1|PPARG|TP53
42805	0.0006957	0.0029567	2	34	21	18200	actinin binding	PPARG|RELA
46983	0.0007596	0.0031754	6	1010	21	18200	protein dimerization activity	AKT1|PTGS2|HIF1A|TP53|RELA|VEGFA
3677	0.00089994	0.0037013	9	2446	21	18200	DNA binding	AR|JUN|PGR|PPARG|FOS|HIF1A|ESR1|TP53|RELA
8234	0.00092501	0.0037441	3	169	21	18200	cysteine-type peptidase activity	CASP9|CASP8|CASP3
51427	0.0011276	0.0044804	3	181	21	18200	hormone receptor binding	PPARG|HIF1A|ESR1
70974	0.0011538	0.0044804	1	1	21	18200	POU domain binding	AR
30331	0.001165	0.0044804	2	44	21	18200	estrogen receptor binding	PPARG|ESR1
46914	0.0011772	0.0044804	6	1098	21	18200	transition metal ion binding	AR|PGR|PPARG|MMP9|ESR1|TP53
19887	0.0012967	0.0048627	3	190	21	18200	protein kinase regulator activity	CCNA2|CCNB1|CASP3
70888	0.0013285	0.0049097	2	47	21	18200	E-box binding	PPARG|HIF1A
1102	0.0013853	0.0049484	2	48	21	18200	RNA polymerase II activating transcription factor binding	JUN|FOS
4175	0.0013948	0.0049484	4	435	21	18200	endopeptidase activity	CASP9|CASP8|CASP3|MMP9
19902	0.0013972	0.0049484	3	195	21	18200	phosphatase binding	AKT1|PPARG|TP53
32813	0.0014432	0.0050415	2	49	21	18200	tumor necrosis factor receptor superfamily binding	CASP8|CASP3
8289	0.0016006	0.0055157	5	776	21	18200	lipid binding	AR|AKT1|PGR|PPARG|ESR1
1085	0.0018149	0.0061706	2	55	21	18200	RNA polymerase II transcription factor binding	AR|TP53
19207	0.0019223	0.00645	3	218	21	18200	kinase regulator activity	CCNA2|CCNB1|CASP3
43621	0.002016	0.0066764	2	58	21	18200	protein self-association	PPARG|TP53
4666	0.0023064	0.0073517	1	2	21	18200	prostaglandin-endoperoxide synthase activity	PTGS2
45155	0.0023064	0.0073517	1	2	21	18200	electron transporter, transferring electrons from CoQH2-cytochrome c reductase complex and cytochrome c oxidase complex activity	CYCS
16005	0.0023064	0.0073517	1	2	21	18200	phospholipase A2 activator activity	CASP3
8047	0.0025676	0.0080832	4	514	21	18200	enzyme activator activity	CASP9|JUN|CCNB1|CASP3
2039	0.0026016	0.0080902	2	66	21	18200	p53 binding	HIF1A|TP53
70491	0.0030871	0.0094846	2	72	21	18200	repressing transcription factor binding	PPARG|RELA
