# Supplementary material for: Network Pharmacology and Molecular Docking Combined to Analyze the Molecular and Pharmacological Mechanism of Pinellia ternata in the Treatment of Hypertension
Source: Curr Issues Mol Biol. 2021 May 1;43(1):6. doi: 10.3390/cimb43010006 (PMC8929114; doi:10.3390/cimb43010006)
Supplement: Supplementary file 1 [file cimb-43-00006-s001.zip › Supplementary Table 5.xls]

## Sheet: Modue1-KEGG
KEGG pathway
#Term	Database	ID	Input number	Background number	P-Value	Corrected P-Value	Input	Hyperlink
Pathways in cancer	KEGG PATHWAY	hsa05200	17	530	1.24417e-28	1.92847e-26	TGFB1|PTGS2|TP53|CASP3|FOS|PPARG|ESR1|JUN|CASP8|CASP9|AKT1|CDK2|VEGFA|CYCS|MMP9|HIF1A|RELA	http://www.genome.jp/kegg-bin/show_pathway?hsa05200/hsa:842%09red/hsa:836%09red/hsa:5468%09red/hsa:54205%09red/hsa:7422%09red/hsa:3725%09red/hsa:4318%09red/hsa:7157%09red/hsa:1017%09red/hsa:841%09red/hsa:5970%09red/hsa:2099%09red/hsa:5743%09red/hsa:2353%09red/hsa:207%09red/hsa:3091%09red/hsa:7040%09red
Hepatitis B	KEGG PATHWAY	hsa05161	13	163	3.7015e-26	2.86866e-24	TGFB1|TP53|CASP3|FOS|JUN|CASP8|CASP9|AKT1|CDK2|CYCS|MMP9|CCNA2|RELA	http://www.genome.jp/kegg-bin/show_pathway?hsa05161/hsa:842%09red/hsa:836%09red/hsa:890%09red/hsa:54205%09red/hsa:3725%09red/hsa:4318%09red/hsa:7157%09red/hsa:841%09red/hsa:5970%09red/hsa:7040%09red/hsa:2353%09red/hsa:207%09red/hsa:1017%09red
Kaposi sarcoma-associated herpesvirus infection	KEGG PATHWAY	hsa05167	12	186	5.44633e-23	2.81394e-21	PTGS2|TP53|CASP3|FOS|JUN|CYCS|CASP9|AKT1|VEGFA|CASP8|HIF1A|RELA	http://www.genome.jp/kegg-bin/show_pathway?hsa05167/hsa:842%09red/hsa:836%09red/hsa:54205%09red/hsa:7422%09red/hsa:3725%09red/hsa:7157%09red/hsa:841%09red/hsa:5970%09red/hsa:5743%09red/hsa:2353%09red/hsa:207%09red/hsa:3091%09red
Measles	KEGG PATHWAY	hsa05162	10	138	1.44619e-19	5.60397e-18	TP53|CASP3|FOS|JUN|CYCS|CASP9|AKT1|CDK2|CASP8|RELA	http://www.genome.jp/kegg-bin/show_pathway?hsa05162/hsa:836%09red/hsa:54205%09red/hsa:3725%09red/hsa:7157%09red/hsa:841%09red/hsa:5970%09red/hsa:842%09red/hsa:2353%09red/hsa:207%09red/hsa:1017%09red
Epstein-Barr virus infection	KEGG PATHWAY	hsa05169	10	201	5.4245e-18	1.68159e-16	TP53|CASP3|JUN|CYCS|CASP9|AKT1|CDK2|CASP8|CCNA2|RELA	http://www.genome.jp/kegg-bin/show_pathway?hsa05169/hsa:836%09red/hsa:890%09red/hsa:54205%09red/hsa:3725%09red/hsa:7157%09red/hsa:841%09red/hsa:5970%09red/hsa:842%09red/hsa:207%09red/hsa:1017%09red
Apoptosis	KEGG PATHWAY	hsa04210	9	136	2.80953e-17	7.25796e-16	TP53|CASP3|FOS|JUN|CYCS|CASP9|AKT1|CASP8|RELA	http://www.genome.jp/kegg-bin/show_pathway?hsa04210/hsa:836%09red/hsa:54205%09red/hsa:3725%09red/hsa:7157%09red/hsa:841%09red/hsa:5970%09red/hsa:842%09red/hsa:2353%09red/hsa:207%09red
Colorectal cancer	KEGG PATHWAY	hsa05210	8	86	1.57717e-16	3.4923e-15	TGFB1|TP53|CASP3|FOS|JUN|CYCS|CASP9|AKT1	http://www.genome.jp/kegg-bin/show_pathway?hsa05210/hsa:842%09red/hsa:836%09red/hsa:54205%09red/hsa:3725%09red/hsa:7157%09red/hsa:7040%09red/hsa:2353%09red/hsa:207%09red
Small cell lung cancer	KEGG PATHWAY	hsa05222	8	93	2.85748e-16	5.53638e-15	PTGS2|TP53|CASP3|CYCS|CASP9|AKT1|CDK2|RELA	http://www.genome.jp/kegg-bin/show_pathway?hsa05222/hsa:836%09red/hsa:54205%09red/hsa:842%09red/hsa:7157%09red/hsa:5970%09red/hsa:5743%09red/hsa:207%09red/hsa:1017%09red
TNF signaling pathway	KEGG PATHWAY	hsa04668	8	112	1.18143e-15	2.03468e-14	PTGS2|CASP3|FOS|JUN|CASP8|AKT1|MMP9|RELA	http://www.genome.jp/kegg-bin/show_pathway?hsa04668/hsa:836%09red/hsa:5743%09red/hsa:3725%09red/hsa:4318%09red/hsa:841%09red/hsa:5970%09red/hsa:2353%09red/hsa:207%09red
Human immunodeficiency virus 1 infection	KEGG PATHWAY	hsa05170	9	212	1.33372e-15	2.06726e-14	CCNB1|CASP3|FOS|JUN|CYCS|CASP9|AKT1|CASP8|RELA	http://www.genome.jp/kegg-bin/show_pathway?hsa05170/hsa:836%09red/hsa:891%09red/hsa:54205%09red/hsa:3725%09red/hsa:841%09red/hsa:5970%09red/hsa:842%09red/hsa:2353%09red/hsa:207%09red
Human cytomegalovirus infection	KEGG PATHWAY	hsa05163	9	225	2.24361e-15	3.16145e-14	PTGS2|TP53|CASP3|CYCS|CASP9|AKT1|VEGFA|CASP8|RELA	http://www.genome.jp/kegg-bin/show_pathway?hsa05163/hsa:836%09red/hsa:5743%09red/hsa:7422%09red/hsa:842%09red/hsa:7157%09red/hsa:841%09red/hsa:5970%09red/hsa:54205%09red/hsa:207%09red
p53 signaling pathway	KEGG PATHWAY	hsa04115	7	72	1.15498e-14	1.49185e-13	CCNB1|TP53|CASP3|CYCS|CASP9|CDK2|CASP8	http://www.genome.jp/kegg-bin/show_pathway?hsa04115/hsa:836%09red/hsa:891%09red/hsa:54205%09red/hsa:7157%09red/hsa:841%09red/hsa:842%09red/hsa:1017%09red
Hepatitis C	KEGG PATHWAY	hsa05160	8	155	1.44108e-14	1.71821e-13	TP53|CASP3|CYCS|CASP9|AKT1|CDK2|CASP8|RELA	http://www.genome.jp/kegg-bin/show_pathway?hsa05160/hsa:836%09red/hsa:54205%09red/hsa:7157%09red/hsa:841%09red/hsa:5970%09red/hsa:842%09red/hsa:207%09red/hsa:1017%09red
IL-17 signaling pathway	KEGG PATHWAY	hsa04657	7	93	6.33634e-14	6.64588e-13	PTGS2|CASP3|FOS|JUN|CASP8|MMP9|RELA	http://www.genome.jp/kegg-bin/show_pathway?hsa04657/hsa:836%09red/hsa:5743%09red/hsa:3725%09red/hsa:4318%09red/hsa:841%09red/hsa:5970%09red/hsa:2353%09red
Human papillomavirus infection	KEGG PATHWAY	hsa05165	9	330	6.43149e-14	6.64588e-13	PTGS2|TP53|CASP3|CASP8|AKT1|CDK2|VEGFA|CCNA2|RELA	http://www.genome.jp/kegg-bin/show_pathway?hsa05165/hsa:836%09red/hsa:890%09red/hsa:5743%09red/hsa:7157%09red/hsa:841%09red/hsa:5970%09red/hsa:7422%09red/hsa:207%09red/hsa:1017%09red
Proteoglycans in cancer	KEGG PATHWAY	hsa05205	8	203	1.1661e-13	1.12966e-12	TGFB1|TP53|CASP3|ESR1|HIF1A|AKT1|VEGFA|MMP9	http://www.genome.jp/kegg-bin/show_pathway?hsa05205/hsa:836%09red/hsa:7422%09red/hsa:4318%09red/hsa:7157%09red/hsa:2099%09red/hsa:7040%09red/hsa:207%09red/hsa:3091%09red
Human T-cell leukemia virus 1 infection	KEGG PATHWAY	hsa05166	8	219	2.10274e-13	1.91721e-12	TGFB1|TP53|FOS|JUN|AKT1|CDK2|CCNA2|RELA	http://www.genome.jp/kegg-bin/show_pathway?hsa05166/hsa:890%09red/hsa:3725%09red/hsa:7157%09red/hsa:5970%09red/hsa:7040%09red/hsa:2353%09red/hsa:207%09red/hsa:1017%09red
Toxoplasmosis	KEGG PATHWAY	hsa05145	7	113	2.34004e-13	2.01504e-12	TGFB1|CASP3|CYCS|CASP9|AKT1|CASP8|RELA	http://www.genome.jp/kegg-bin/show_pathway?hsa05145/hsa:836%09red/hsa:54205%09red/hsa:842%09red/hsa:841%09red/hsa:5970%09red/hsa:7040%09red/hsa:207%09red
Relaxin signaling pathway	KEGG PATHWAY	hsa04926	7	130	6.01801e-13	4.90943e-12	TGFB1|FOS|JUN|AKT1|VEGFA|MMP9|RELA	http://www.genome.jp/kegg-bin/show_pathway?hsa04926/hsa:4318%09red/hsa:7422%09red/hsa:3725%09red/hsa:5970%09red/hsa:7040%09red/hsa:2353%09red/hsa:207%09red
Fluid shear stress and atherosclerosis	KEGG PATHWAY	hsa05418	7	139	9.45998e-13	7.33148e-12	TP53|FOS|JUN|AKT1|VEGFA|MMP9|RELA	http://www.genome.jp/kegg-bin/show_pathway?hsa05418/hsa:4318%09red/hsa:3725%09red/hsa:7157%09red/hsa:5970%09red/hsa:7422%09red/hsa:2353%09red/hsa:207%09red
Non-alcoholic fatty liver disease (NAFLD)	KEGG PATHWAY	hsa04932	7	149	1.51376e-12	1.1173e-11	TGFB1|CASP3|JUN|CYCS|AKT1|CASP8|RELA	http://www.genome.jp/kegg-bin/show_pathway?hsa04932/hsa:836%09red/hsa:54205%09red/hsa:3725%09red/hsa:841%09red/hsa:5970%09red/hsa:7040%09red/hsa:207%09red
MAPK signaling pathway	KEGG PATHWAY	hsa04010	8	295	2.13824e-12	1.50649e-11	TGFB1|TP53|CASP3|FOS|JUN|AKT1|VEGFA|RELA	http://www.genome.jp/kegg-bin/show_pathway?hsa04010/hsa:836%09red/hsa:7422%09red/hsa:3725%09red/hsa:7157%09red/hsa:5970%09red/hsa:7040%09red/hsa:2353%09red/hsa:207%09red
Cellular senescence	KEGG PATHWAY	hsa04218	7	160	2.4528e-12	1.65297e-11	TGFB1|CCNB1|CCNA2|AKT1|CDK2|TP53|RELA	http://www.genome.jp/kegg-bin/show_pathway?hsa04218/hsa:890%09red/hsa:891%09red/hsa:7157%09red/hsa:5970%09red/hsa:7040%09red/hsa:207%09red/hsa:1017%09red
Platinum drug resistance	KEGG PATHWAY	hsa01524	6	73	2.8945e-12	1.86936e-11	TP53|CASP3|CYCS|CASP9|AKT1|CASP8	http://www.genome.jp/kegg-bin/show_pathway?hsa01524/hsa:836%09red/hsa:54205%09red/hsa:7157%09red/hsa:841%09red/hsa:842%09red/hsa:207%09red
Pancreatic cancer	KEGG PATHWAY	hsa05212	6	75	3.3773e-12	2.09393e-11	TGFB1|TP53|CASP9|AKT1|VEGFA|RELA	http://www.genome.jp/kegg-bin/show_pathway?hsa05212/hsa:842%09red/hsa:7157%09red/hsa:5970%09red/hsa:7422%09red/hsa:207%09red/hsa:7040%09red
Tuberculosis	KEGG PATHWAY	hsa05152	7	179	5.2526e-12	3.13136e-11	TGFB1|CASP3|CYCS|CASP9|AKT1|CASP8|RELA	http://www.genome.jp/kegg-bin/show_pathway?hsa05152/hsa:836%09red/hsa:54205%09red/hsa:842%09red/hsa:841%09red/hsa:5970%09red/hsa:7040%09red/hsa:207%09red
Viral carcinogenesis	KEGG PATHWAY	hsa05203	7	201	1.15489e-11	6.6299e-11	CCNA2|CASP3|JUN|CASP8|CDK2|TP53|RELA	http://www.genome.jp/kegg-bin/show_pathway?hsa05203/hsa:836%09red/hsa:890%09red/hsa:3725%09red/hsa:7157%09red/hsa:841%09red/hsa:5970%09red/hsa:1017%09red
Prostate cancer	KEGG PATHWAY	hsa05215	6	97	1.47725e-11	8.17766e-11	TP53|CASP9|AKT1|CDK2|MMP9|RELA	http://www.genome.jp/kegg-bin/show_pathway?hsa05215/hsa:4318%09red/hsa:7157%09red/hsa:5970%09red/hsa:842%09red/hsa:207%09red/hsa:1017%09red
Endocrine resistance	KEGG PATHWAY	hsa01522	6	98	1.56718e-11	8.37633e-11	TP53|ESR1|FOS|JUN|AKT1|MMP9	http://www.genome.jp/kegg-bin/show_pathway?hsa01522/hsa:4318%09red/hsa:3725%09red/hsa:2099%09red/hsa:7157%09red/hsa:2353%09red/hsa:207%09red
AGE-RAGE signaling pathway in diabetic complications	KEGG PATHWAY	hsa04933	6	100	1.76074e-11	9.09716e-11	TGFB1|CASP3|JUN|AKT1|VEGFA|RELA	http://www.genome.jp/kegg-bin/show_pathway?hsa04933/hsa:836%09red/hsa:3725%09red/hsa:5970%09red/hsa:7422%09red/hsa:207%09red/hsa:7040%09red
Chagas disease (American trypanosomiasis)	KEGG PATHWAY	hsa05142	6	103	2.08806e-11	1.04403e-10	TGFB1|FOS|JUN|CASP8|AKT1|RELA	http://www.genome.jp/kegg-bin/show_pathway?hsa05142/hsa:3725%09red/hsa:841%09red/hsa:5970%09red/hsa:7040%09red/hsa:2353%09red/hsa:207%09red
Osteoclast differentiation	KEGG PATHWAY	hsa04380	6	128	7.34096e-11	3.55578e-10	TGFB1|PPARG|FOS|JUN|AKT1|RELA	http://www.genome.jp/kegg-bin/show_pathway?hsa04380/hsa:2353%09red/hsa:3725%09red/hsa:5970%09red/hsa:7040%09red/hsa:5468%09red/hsa:207%09red
Estrogen signaling pathway	KEGG PATHWAY	hsa04915	6	138	1.1359e-10	5.3353e-10	ESR1|FOS|JUN|AKT1|PGR|MMP9	http://www.genome.jp/kegg-bin/show_pathway?hsa04915/hsa:4318%09red/hsa:3725%09red/hsa:2099%09red/hsa:5241%09red/hsa:2353%09red/hsa:207%09red
Legionellosis	KEGG PATHWAY	hsa05134	5	55	1.40283e-10	6.39523e-10	CYCS|RELA|CASP3|CASP8|CASP9	http://www.genome.jp/kegg-bin/show_pathway?hsa05134/hsa:54205%09red/hsa:836%09red/hsa:841%09red/hsa:5970%09red/hsa:842%09red
Breast cancer	KEGG PATHWAY	hsa05224	6	147	1.63969e-10	7.26146e-10	TP53|ESR1|FOS|JUN|AKT1|PGR	http://www.genome.jp/kegg-bin/show_pathway?hsa05224/hsa:7157%09red/hsa:3725%09red/hsa:2099%09red/hsa:5241%09red/hsa:2353%09red/hsa:207%09red
Influenza A	KEGG PATHWAY	hsa05164	6	167	3.44408e-10	1.48287e-09	CASP3|CYCS|CASP9|AKT1|CASP8|RELA	http://www.genome.jp/kegg-bin/show_pathway?hsa05164/hsa:836%09red/hsa:54205%09red/hsa:841%09red/hsa:5970%09red/hsa:842%09red/hsa:207%09red
Renal cell carcinoma	KEGG PATHWAY	hsa05211	5	69	4.118e-10	1.72511e-09	AKT1|VEGFA|JUN|HIF1A|TGFB1	http://www.genome.jp/kegg-bin/show_pathway?hsa05211/hsa:7422%09red/hsa:3725%09red/hsa:207%09red/hsa:3091%09red/hsa:7040%09red
Leishmaniasis	KEGG PATHWAY	hsa05140	5	74	5.75164e-10	2.34606e-09	TGFB1|PTGS2|RELA|JUN|FOS	http://www.genome.jp/kegg-bin/show_pathway?hsa05140/hsa:5743%09red/hsa:3725%09red/hsa:2353%09red/hsa:5970%09red/hsa:7040%09red
Huntington disease	KEGG PATHWAY	hsa05016	6	193	8.0025e-10	3.18048e-09	TP53|CASP3|CYCS|CASP9|PPARG|CASP8	http://www.genome.jp/kegg-bin/show_pathway?hsa05016/hsa:836%09red/hsa:54205%09red/hsa:7157%09red/hsa:841%09red/hsa:842%09red/hsa:5468%09red
PD-L1 expression and PD-1 checkpoint pathway in cancer	KEGG PATHWAY	hsa05235	5	89	1.39371e-09	5.40062e-09	AKT1|RELA|JUN|HIF1A|FOS	http://www.genome.jp/kegg-bin/show_pathway?hsa05235/hsa:2353%09red/hsa:3725%09red/hsa:207%09red/hsa:5970%09red/hsa:3091%09red
Progesterone-mediated oocyte maturation	KEGG PATHWAY	hsa04914	5	99	2.32705e-09	8.79737e-09	AKT1|CCNB1|CCNA2|PGR|CDK2	http://www.genome.jp/kegg-bin/show_pathway?hsa04914/hsa:1017%09red/hsa:207%09red/hsa:890%09red/hsa:5241%09red/hsa:891%09red
C-type lectin receptor signaling pathway	KEGG PATHWAY	hsa04625	5	104	2.95123e-09	1.06382e-08	AKT1|RELA|JUN|CASP8|PTGS2	http://www.genome.jp/kegg-bin/show_pathway?hsa04625/hsa:207%09red/hsa:3725%09red/hsa:841%09red/hsa:5970%09red/hsa:5743%09red
Toll-like receptor signaling pathway	KEGG PATHWAY	hsa04620	5	104	2.95123e-09	1.06382e-08	AKT1|RELA|JUN|CASP8|FOS	http://www.genome.jp/kegg-bin/show_pathway?hsa04620/hsa:207%09red/hsa:2353%09red/hsa:3725%09red/hsa:841%09red/hsa:5970%09red
Th17 cell differentiation	KEGG PATHWAY	hsa04659	5	107	3.38544e-09	1.1926e-08	TGFB1|RELA|JUN|HIF1A|FOS	http://www.genome.jp/kegg-bin/show_pathway?hsa04659/hsa:3091%09red/hsa:3725%09red/hsa:2353%09red/hsa:5970%09red/hsa:7040%09red
Apoptosis - multiple species	KEGG PATHWAY	hsa04215	4	33	3.94633e-09	1.35929e-08	CYCS|CASP3|CASP8|CASP9	http://www.genome.jp/kegg-bin/show_pathway?hsa04215/hsa:54205%09red/hsa:836%09red/hsa:841%09red/hsa:842%09red
Herpes simplex virus 1 infection	KEGG PATHWAY	hsa05168	7	492	5.11765e-09	1.72443e-08	TP53|CASP3|CYCS|CASP9|AKT1|CASP8|RELA	http://www.genome.jp/kegg-bin/show_pathway?hsa05168/hsa:836%09red/hsa:54205%09red/hsa:7157%09red/hsa:841%09red/hsa:5970%09red/hsa:842%09red/hsa:207%09red
Thyroid hormone signaling pathway	KEGG PATHWAY	hsa04919	5	119	5.65864e-09	1.86615e-08	AKT1|ESR1|TP53|HIF1A|CASP9	http://www.genome.jp/kegg-bin/show_pathway?hsa04919/hsa:2099%09red/hsa:207%09red/hsa:3091%09red/hsa:7157%09red/hsa:842%09red
Cell cycle	KEGG PATHWAY	hsa04110	5	124	6.90564e-09	2.22995e-08	TGFB1|CCNB1|CCNA2|TP53|CDK2	http://www.genome.jp/kegg-bin/show_pathway?hsa04110/hsa:1017%09red/hsa:891%09red/hsa:890%09red/hsa:7157%09red/hsa:7040%09red
Amyotrophic lateral sclerosis (ALS)	KEGG PATHWAY	hsa05014	4	51	2.0252e-08	6.40626e-08	TP53|CASP3|CYCS|CASP9	http://www.genome.jp/kegg-bin/show_pathway?hsa05014/hsa:54205%09red/hsa:836%09red/hsa:7157%09red/hsa:842%09red
PI3K-Akt signaling pathway	KEGG PATHWAY	hsa04151	6	354	2.75281e-08	8.53371e-08	TP53|CASP9|AKT1|CDK2|VEGFA|RELA	http://www.genome.jp/kegg-bin/show_pathway?hsa04151/hsa:842%09red/hsa:7157%09red/hsa:5970%09red/hsa:7422%09red/hsa:207%09red/hsa:1017%09red
VEGF signaling pathway	KEGG PATHWAY	hsa04370	4	59	3.5273e-08	1.07202e-07	AKT1|CASP9|VEGFA|PTGS2	http://www.genome.jp/kegg-bin/show_pathway?hsa04370/hsa:5743%09red/hsa:7422%09red/hsa:207%09red/hsa:842%09red
Viral myocarditis	KEGG PATHWAY	hsa05416	4	60	3.76115e-08	1.12111e-07	CYCS|CASP3|CASP8|CASP9	http://www.genome.jp/kegg-bin/show_pathway?hsa05416/hsa:54205%09red/hsa:836%09red/hsa:841%09red/hsa:842%09red
Mitophagy - animal	KEGG PATHWAY	hsa04137	4	65	5.10861e-08	1.49403e-07	JUN|RELA|TP53|HIF1A	http://www.genome.jp/kegg-bin/show_pathway?hsa04137/hsa:3725%09red/hsa:5970%09red/hsa:7157%09red/hsa:3091%09red
Prolactin signaling pathway	KEGG PATHWAY	hsa04917	4	70	6.78764e-08	1.9483e-07	AKT1|RELA|ESR1|FOS	http://www.genome.jp/kegg-bin/show_pathway?hsa04917/hsa:2353%09red/hsa:207%09red/hsa:5970%09red/hsa:2099%09red
Pertussis	KEGG PATHWAY	hsa05133	4	76	9.31048e-08	2.57701e-07	RELA|JUN|CASP3|FOS	http://www.genome.jp/kegg-bin/show_pathway?hsa05133/hsa:836%09red/hsa:3725%09red/hsa:2353%09red/hsa:5970%09red
Chronic myeloid leukemia	KEGG PATHWAY	hsa05220	4	76	9.31048e-08	2.57701e-07	AKT1|RELA|TP53|TGFB1	http://www.genome.jp/kegg-bin/show_pathway?hsa05220/hsa:207%09red/hsa:5970%09red/hsa:7157%09red/hsa:7040%09red
B cell receptor signaling pathway	KEGG PATHWAY	hsa04662	4	82	1.2475e-07	3.39233e-07	AKT1|RELA|JUN|FOS	http://www.genome.jp/kegg-bin/show_pathway?hsa04662/hsa:2353%09red/hsa:3725%09red/hsa:207%09red/hsa:5970%09red
Longevity regulating pathway	KEGG PATHWAY	hsa04211	4	89	1.71107e-07	4.57268e-07	AKT1|RELA|TP53|PPARG	http://www.genome.jp/kegg-bin/show_pathway?hsa04211/hsa:5468%09red/hsa:207%09red/hsa:5970%09red/hsa:7157%09red
Rheumatoid arthritis	KEGG PATHWAY	hsa05323	4	91	1.86438e-07	4.89794e-07	TGFB1|VEGFA|JUN|FOS	http://www.genome.jp/kegg-bin/show_pathway?hsa05323/hsa:7422%09red/hsa:3725%09red/hsa:2353%09red/hsa:7040%09red
Choline metabolism in cancer	KEGG PATHWAY	hsa05231	4	99	2.58206e-07	6.67031e-07	AKT1|JUN|HIF1A|FOS	http://www.genome.jp/kegg-bin/show_pathway?hsa05231/hsa:3725%09red/hsa:207%09red/hsa:2353%09red/hsa:3091%09red
T cell receptor signaling pathway	KEGG PATHWAY	hsa04660	4	103	3.00966e-07	7.64749e-07	AKT1|RELA|JUN|FOS	http://www.genome.jp/kegg-bin/show_pathway?hsa04660/hsa:2353%09red/hsa:3725%09red/hsa:207%09red/hsa:5970%09red
HIF-1 signaling pathway	KEGG PATHWAY	hsa04066	4	109	3.74726e-07	9.36814e-07	AKT1|RELA|VEGFA|HIF1A	http://www.genome.jp/kegg-bin/show_pathway?hsa04066/hsa:7422%09red/hsa:207%09red/hsa:5970%09red/hsa:3091%09red
MicroRNAs in cancer	KEGG PATHWAY	hsa05206	5	299	4.94822e-07	1.21742e-06	PTGS2|VEGFA|TP53|CASP3|MMP9	http://www.genome.jp/kegg-bin/show_pathway?hsa05206/hsa:5743%09red/hsa:836%09red/hsa:4318%09red/hsa:7157%09red/hsa:7422%09red
Neurotrophin signaling pathway	KEGG PATHWAY	hsa04722	4	119	5.26535e-07	1.2752e-06	JUN|RELA|TP53|AKT1	http://www.genome.jp/kegg-bin/show_pathway?hsa04722/hsa:3725%09red/hsa:207%09red/hsa:5970%09red/hsa:7157%09red
Yersinia infection	KEGG PATHWAY	hsa05135	4	121	5.61683e-07	1.3394e-06	AKT1|RELA|JUN|FOS	http://www.genome.jp/kegg-bin/show_pathway?hsa05135/hsa:2353%09red/hsa:3725%09red/hsa:207%09red/hsa:5970%09red
FoxO signaling pathway	KEGG PATHWAY	hsa04068	4	132	7.87167e-07	1.84865e-06	AKT1|CCNB1|CDK2|TGFB1	http://www.genome.jp/kegg-bin/show_pathway?hsa04068/hsa:891%09red/hsa:207%09red/hsa:1017%09red/hsa:7040%09red
Gastric cancer	KEGG PATHWAY	hsa05226	4	149	1.25974e-06	2.91432e-06	AKT1|CDK2|TP53|TGFB1	http://www.genome.jp/kegg-bin/show_pathway?hsa05226/hsa:207%09red/hsa:1017%09red/hsa:7157%09red/hsa:7040%09red
Bladder cancer	KEGG PATHWAY	hsa05219	3	41	1.72153e-06	3.92408e-06	VEGFA|TP53|MMP9	http://www.genome.jp/kegg-bin/show_pathway?hsa05219/hsa:4318%09red/hsa:7157%09red/hsa:7422%09red
Alzheimer disease	KEGG PATHWAY	hsa05010	4	171	2.15043e-06	4.83068e-06	CYCS|CASP3|CASP8|CASP9	http://www.genome.jp/kegg-bin/show_pathway?hsa05010/hsa:54205%09red/hsa:836%09red/hsa:841%09red/hsa:842%09red
Transcriptional misregulation in cancer	KEGG PATHWAY	hsa05202	4	186	2.98071e-06	6.60013e-06	PPARG|RELA|TP53|MMP9	http://www.genome.jp/kegg-bin/show_pathway?hsa05202/hsa:4318%09red/hsa:5468%09red/hsa:5970%09red/hsa:7157%09red
Endometrial cancer	KEGG PATHWAY	hsa05213	3	58	4.65092e-06	1.01534e-05	AKT1|TP53|CASP9	http://www.genome.jp/kegg-bin/show_pathway?hsa05213/hsa:207%09red/hsa:7157%09red/hsa:842%09red
cAMP signaling pathway	KEGG PATHWAY	hsa04024	4	214	5.13682e-06	1.10584e-05	AKT1|RELA|JUN|FOS	http://www.genome.jp/kegg-bin/show_pathway?hsa04024/hsa:2353%09red/hsa:3725%09red/hsa:207%09red/hsa:5970%09red
Inflammatory bowel disease (IBD)	KEGG PATHWAY	hsa05321	3	65	6.46083e-06	1.37182e-05	TGFB1|RELA|JUN	http://www.genome.jp/kegg-bin/show_pathway?hsa05321/hsa:3725%09red/hsa:5970%09red/hsa:7040%09red
Non-small cell lung cancer	KEGG PATHWAY	hsa05223	3	66	6.75218e-06	1.41431e-05	AKT1|TP53|CASP9	http://www.genome.jp/kegg-bin/show_pathway?hsa05223/hsa:207%09red/hsa:7157%09red/hsa:842%09red
Central carbon metabolism in cancer	KEGG PATHWAY	hsa05230	3	69	7.67807e-06	1.5868e-05	AKT1|TP53|HIF1A	http://www.genome.jp/kegg-bin/show_pathway?hsa05230/hsa:207%09red/hsa:3091%09red/hsa:7157%09red
Epithelial cell signaling in Helicobacter pylori infection	KEGG PATHWAY	hsa05120	3	70	8.00438e-06	1.63247e-05	RELA|JUN|CASP3	http://www.genome.jp/kegg-bin/show_pathway?hsa05120/hsa:836%09red/hsa:3725%09red/hsa:5970%09red
Salmonella infection	KEGG PATHWAY	hsa05132	3	83	1.3112e-05	2.63943e-05	RELA|JUN|FOS	http://www.genome.jp/kegg-bin/show_pathway?hsa05132/hsa:3725%09red/hsa:2353%09red/hsa:5970%09red
Th1 and Th2 cell differentiation	KEGG PATHWAY	hsa04658	3	92	1.76792e-05	3.51318e-05	RELA|JUN|FOS	http://www.genome.jp/kegg-bin/show_pathway?hsa04658/hsa:3725%09red/hsa:2353%09red/hsa:5970%09red
Amoebiasis	KEGG PATHWAY	hsa05146	3	95	1.94066e-05	3.80763e-05	TGFB1|RELA|CASP3	http://www.genome.jp/kegg-bin/show_pathway?hsa05146/hsa:836%09red/hsa:5970%09red/hsa:7040%09red
Sphingolipid signaling pathway	KEGG PATHWAY	hsa04071	3	119	3.73615e-05	7.23879e-05	AKT1|RELA|TP53	http://www.genome.jp/kegg-bin/show_pathway?hsa04071/hsa:207%09red/hsa:5970%09red/hsa:7157%09red
AMPK signaling pathway	KEGG PATHWAY	hsa04152	3	120	3.82823e-05	7.32563e-05	AKT1|CCNA2|PPARG	http://www.genome.jp/kegg-bin/show_pathway?hsa04152/hsa:5468%09red/hsa:207%09red/hsa:890%09red
Oocyte meiosis	KEGG PATHWAY	hsa04114	3	128	4.61911e-05	8.73124e-05	CCNB1|PGR|CDK2	http://www.genome.jp/kegg-bin/show_pathway?hsa04114/hsa:1017%09red/hsa:5241%09red/hsa:891%09red
Parkinson disease	KEGG PATHWAY	hsa05012	3	142	6.24784e-05	0.000116677	CASP3|CYCS|CASP9	http://www.genome.jp/kegg-bin/show_pathway?hsa05012/hsa:54205%09red/hsa:836%09red/hsa:842%09red
Oxytocin signaling pathway	KEGG PATHWAY	hsa04921	3	153	7.76244e-05	0.000143236	PTGS2|JUN|FOS	http://www.genome.jp/kegg-bin/show_pathway?hsa04921/hsa:5743%09red/hsa:3725%09red/hsa:2353%09red
Hepatocellular carcinoma	KEGG PATHWAY	hsa05225	3	168	0.000101886	0.000185792	AKT1|TP53|TGFB1	http://www.genome.jp/kegg-bin/show_pathway?hsa05225/hsa:207%09red/hsa:7157%09red/hsa:7040%09red
NOD-like receptor signaling pathway	KEGG PATHWAY	hsa04621	3	178	0.00012053	0.000217233	RELA|JUN|CASP8	http://www.genome.jp/kegg-bin/show_pathway?hsa04621/hsa:3725%09red/hsa:841%09red/hsa:5970%09red
Focal adhesion	KEGG PATHWAY	hsa04510	3	199	0.000166622	0.000296855	AKT1|VEGFA|JUN	http://www.genome.jp/kegg-bin/show_pathway?hsa04510/hsa:3725%09red/hsa:207%09red/hsa:7422%09red
Thyroid cancer	KEGG PATHWAY	hsa05216	2	37	0.000199473	0.000351345	PPARG|TP53	http://www.genome.jp/kegg-bin/show_pathway?hsa05216/hsa:5468%09red/hsa:7157%09red
Ras signaling pathway	KEGG PATHWAY	hsa04014	3	232	0.000259937	0.0004527	AKT1|RELA|VEGFA	http://www.genome.jp/kegg-bin/show_pathway?hsa04014/hsa:207%09red/hsa:5970%09red/hsa:7422%09red
Cocaine addiction	KEGG PATHWAY	hsa05030	2	49	0.000341898	0.000588824	RELA|JUN	http://www.genome.jp/kegg-bin/show_pathway?hsa05030/hsa:3725%09red/hsa:5970%09red
Regulation of lipolysis in adipocytes	KEGG PATHWAY	hsa04923	2	55	0.000427149	0.000727561	AKT1|PTGS2	http://www.genome.jp/kegg-bin/show_pathway?hsa04923/hsa:5743%09red/hsa:207%09red
Acute myeloid leukemia	KEGG PATHWAY	hsa05221	2	66	0.00060752	0.00102354	AKT1|RELA	http://www.genome.jp/kegg-bin/show_pathway?hsa05221/hsa:207%09red/hsa:5970%09red
Amphetamine addiction	KEGG PATHWAY	hsa05031	2	68	0.000643642	0.00107274	JUN|FOS	http://www.genome.jp/kegg-bin/show_pathway?hsa05031/hsa:3725%09red/hsa:2353%09red
Adipocytokine signaling pathway	KEGG PATHWAY	hsa04920	2	69	0.000662085	0.00109174	AKT1|RELA	http://www.genome.jp/kegg-bin/show_pathway?hsa04920/hsa:207%09red/hsa:5970%09red
RIG-I-like receptor signaling pathway	KEGG PATHWAY	hsa04622	2	70	0.000680782	0.00111075	RELA|CASP8	http://www.genome.jp/kegg-bin/show_pathway?hsa04622/hsa:841%09red/hsa:5970%09red
Melanoma	KEGG PATHWAY	hsa05218	2	72	0.000718939	0.00116079	AKT1|TP53	http://www.genome.jp/kegg-bin/show_pathway?hsa05218/hsa:207%09red/hsa:7157%09red
Glioma	KEGG PATHWAY	hsa05214	2	75	0.000778076	0.00124332	AKT1|TP53	http://www.genome.jp/kegg-bin/show_pathway?hsa05214/hsa:207%09red/hsa:7157%09red
EGFR tyrosine kinase inhibitor resistance	KEGG PATHWAY	hsa01521	2	79	0.000860465	0.00136094	AKT1|VEGFA	http://www.genome.jp/kegg-bin/show_pathway?hsa01521/hsa:207%09red/hsa:7422%09red
ErbB signaling pathway	KEGG PATHWAY	hsa04012	2	85	0.0009916	0.0015525	AKT1|JUN	http://www.genome.jp/kegg-bin/show_pathway?hsa04012/hsa:3725%09red/hsa:207%09red
NF-kappa B signaling pathway	KEGG PATHWAY	hsa04064	2	100	0.00135876	0.00210608	PTGS2|RELA	http://www.genome.jp/kegg-bin/show_pathway?hsa04064/hsa:5743%09red/hsa:5970%09red
Insulin resistance	KEGG PATHWAY	hsa04931	2	108	0.00157733	0.00242065	AKT1|RELA	http://www.genome.jp/kegg-bin/show_pathway?hsa04931/hsa:207%09red/hsa:5970%09red
Cholinergic synapse	KEGG PATHWAY	hsa04725	2	112	0.00169249	0.00257192	AKT1|FOS	http://www.genome.jp/kegg-bin/show_pathway?hsa04725/hsa:2353%09red/hsa:207%09red
Serotonergic synapse	KEGG PATHWAY	hsa04726	2	115	0.00178143	0.00268079	PTGS2|CASP3	http://www.genome.jp/kegg-bin/show_pathway?hsa04726/hsa:5743%09red/hsa:836%09red
Autophagy - animal	KEGG PATHWAY	hsa04140	2	128	0.002192	0.00326692	AKT1|HIF1A	http://www.genome.jp/kegg-bin/show_pathway?hsa04140/hsa:207%09red/hsa:3091%09red
Dopaminergic synapse	KEGG PATHWAY	hsa04728	2	131	0.00229252	0.0033842	AKT1|FOS	http://www.genome.jp/kegg-bin/show_pathway?hsa04728/hsa:2353%09red/hsa:207%09red
Wnt signaling pathway	KEGG PATHWAY	hsa04310	2	160	0.00337425	0.00493405	JUN|TP53	http://www.genome.jp/kegg-bin/show_pathway?hsa04310/hsa:3725%09red/hsa:7157%09red
Chemokine signaling pathway	KEGG PATHWAY	hsa04062	2	190	0.00469876	0.00680661	AKT1|RELA	http://www.genome.jp/kegg-bin/show_pathway?hsa04062/hsa:207%09red/hsa:5970%09red
Rap1 signaling pathway	KEGG PATHWAY	hsa04015	2	210	0.00569477	0.00817306	AKT1|VEGFA	http://www.genome.jp/kegg-bin/show_pathway?hsa04015/hsa:207%09red/hsa:7422%09red
Folate biosynthesis	KEGG PATHWAY	hsa00790	1	26	0.0143451	0.020399	AR	http://www.genome.jp/kegg-bin/show_pathway?hsa00790/hsa:231%09red
Galactose metabolism	KEGG PATHWAY	hsa00052	1	31	0.01698	0.0237108	AR	http://www.genome.jp/kegg-bin/show_pathway?hsa00052/hsa:231%09red
Antifolate resistance	KEGG PATHWAY	hsa01523	1	31	0.01698	0.0237108	RELA	http://www.genome.jp/kegg-bin/show_pathway?hsa01523/hsa:5970%09red
Fructose and mannose metabolism	KEGG PATHWAY	hsa00051	1	33	0.0180321	0.0249551	AR	http://www.genome.jp/kegg-bin/show_pathway?hsa00051/hsa:231%09red
Pentose and glucuronate interconversions	KEGG PATHWAY	hsa00040	1	34	0.0185577	0.0254553	AR	http://www.genome.jp/kegg-bin/show_pathway?hsa00040/hsa:231%09red
Ferroptosis	KEGG PATHWAY	hsa04216	1	40	0.0217059	0.0295125	TP53	http://www.genome.jp/kegg-bin/show_pathway?hsa04216/hsa:7157%09red
Carbohydrate digestion and absorption	KEGG PATHWAY	hsa04973	1	44	0.0237994	0.0320774	AKT1	http://www.genome.jp/kegg-bin/show_pathway?hsa04973/hsa:207%09red
Intestinal immune network for IgA production	KEGG PATHWAY	hsa04672	1	49	0.0264102	0.0346914	TGFB1	http://www.genome.jp/kegg-bin/show_pathway?hsa04672/hsa:7040%09red
Ovarian steroidogenesis	KEGG PATHWAY	hsa04913	1	49	0.0264102	0.0346914	PTGS2	http://www.genome.jp/kegg-bin/show_pathway?hsa04913/hsa:5743%09red
Malaria	KEGG PATHWAY	hsa05144	1	49	0.0264102	0.0346914	TGFB1	http://www.genome.jp/kegg-bin/show_pathway?hsa05144/hsa:7040%09red
Endocrine and other factor-regulated calcium reabsorption	KEGG PATHWAY	hsa04961	1	50	0.0269316	0.035079	ESR1	http://www.genome.jp/kegg-bin/show_pathway?hsa04961/hsa:2099%09red
Glycerolipid metabolism	KEGG PATHWAY	hsa00561	1	61	0.0326491	0.0421065	AR	http://www.genome.jp/kegg-bin/show_pathway?hsa00561/hsa:231%09red
Longevity regulating pathway - multiple species	KEGG PATHWAY	hsa04213	1	62	0.0331673	0.0421065	AKT1	http://www.genome.jp/kegg-bin/show_pathway?hsa04213/hsa:207%09red
Basal cell carcinoma	KEGG PATHWAY	hsa05217	1	63	0.0336852	0.0421065	TP53	http://www.genome.jp/kegg-bin/show_pathway?hsa05217/hsa:7157%09red
Cytosolic DNA-sensing pathway	KEGG PATHWAY	hsa04623	1	63	0.0336852	0.0421065	RELA	http://www.genome.jp/kegg-bin/show_pathway?hsa04623/hsa:5970%09red
Arachidonic acid metabolism	KEGG PATHWAY	hsa00590	1	63	0.0336852	0.0421065	PTGS2	http://www.genome.jp/kegg-bin/show_pathway?hsa00590/hsa:5743%09red
Shigellosis	KEGG PATHWAY	hsa05131	1	68	0.0362708	0.0446189	RELA	http://www.genome.jp/kegg-bin/show_pathway?hsa05131/hsa:5970%09red
Fc epsilon RI signaling pathway	KEGG PATHWAY	hsa04664	1	68	0.0362708	0.0446189	AKT1	http://www.genome.jp/kegg-bin/show_pathway?hsa04664/hsa:207%09red
PPAR signaling pathway	KEGG PATHWAY	hsa03320	1	76	0.0403942	0.0493	PPARG	http://www.genome.jp/kegg-bin/show_pathway?hsa03320/hsa:5468%09red
Chemical carcinogenesis	KEGG PATHWAY	hsa05204	1	82	0.0434756	0.0526463	PTGS2	http://www.genome.jp/kegg-bin/show_pathway?hsa05204/hsa:5743%09red
Hypertrophic cardiomyopathy (HCM)	KEGG PATHWAY	hsa05410	1	90	0.0475696	0.0571572	TGFB1	http://www.genome.jp/kegg-bin/show_pathway?hsa05410/hsa:7040%09red
GnRH signaling pathway	KEGG PATHWAY	hsa04912	1	93	0.0491005	0.0582545	JUN	http://www.genome.jp/kegg-bin/show_pathway?hsa04912/hsa:3725%09red
TGF-beta signaling pathway	KEGG PATHWAY	hsa04350	1	94	0.0496103	0.0582545	TGFB1	http://www.genome.jp/kegg-bin/show_pathway?hsa04350/hsa:7040%09red
Fc gamma R-mediated phagocytosis	KEGG PATHWAY	hsa04666	1	94	0.0496103	0.0582545	AKT1	http://www.genome.jp/kegg-bin/show_pathway?hsa04666/hsa:207%09red
Dilated cardiomyopathy (DCM)	KEGG PATHWAY	hsa05414	1	96	0.0506291	0.0590038	TGFB1	http://www.genome.jp/kegg-bin/show_pathway?hsa05414/hsa:7040%09red
Circadian entrainment	KEGG PATHWAY	hsa04713	1	97	0.0511381	0.0591523	FOS	http://www.genome.jp/kegg-bin/show_pathway?hsa04713/hsa:2353%09red
Glucagon signaling pathway	KEGG PATHWAY	hsa04922	1	106	0.0557075	0.0634901	AKT1	http://www.genome.jp/kegg-bin/show_pathway?hsa04922/hsa:207%09red
Parathyroid hormone synthesis, secretion and action	KEGG PATHWAY	hsa04928	1	106	0.0557075	0.0634901	FOS	http://www.genome.jp/kegg-bin/show_pathway?hsa04928/hsa:2353%09red
Leukocyte transendothelial migration	KEGG PATHWAY	hsa04670	1	112	0.0587421	0.06646	MMP9	http://www.genome.jp/kegg-bin/show_pathway?hsa04670/hsa:4318%09red
Platelet activation	KEGG PATHWAY	hsa04611	1	124	0.0647834	0.072764	AKT1	http://www.genome.jp/kegg-bin/show_pathway?hsa04611/hsa:207%09red
Natural killer cell mediated cytotoxicity	KEGG PATHWAY	hsa04650	1	131	0.0682905	0.0761513	CASP3	http://www.genome.jp/kegg-bin/show_pathway?hsa04650/hsa:836%09red
Insulin signaling pathway	KEGG PATHWAY	hsa04910	1	137	0.0712866	0.0783647	AKT1	http://www.genome.jp/kegg-bin/show_pathway?hsa04910/hsa:207%09red
Apelin signaling pathway	KEGG PATHWAY	hsa04371	1	137	0.0712866	0.0783647	AKT1	http://www.genome.jp/kegg-bin/show_pathway?hsa04371/hsa:207%09red
Signaling pathways regulating pluripotency of stem cells	KEGG PATHWAY	hsa04550	1	140	0.0727812	0.0794442	AKT1	http://www.genome.jp/kegg-bin/show_pathway?hsa04550/hsa:207%09red
Phospholipase D signaling pathway	KEGG PATHWAY	hsa04072	1	148	0.0767556	0.0825789	AKT1	http://www.genome.jp/kegg-bin/show_pathway?hsa04072/hsa:207%09red
Retrograde endocannabinoid signaling	KEGG PATHWAY	hsa04723	1	148	0.0767556	0.0825789	PTGS2	http://www.genome.jp/kegg-bin/show_pathway?hsa04723/hsa:5743%09red
Adrenergic signaling in cardiomyocytes	KEGG PATHWAY	hsa04261	1	149	0.0772512	0.0825789	AKT1	http://www.genome.jp/kegg-bin/show_pathway?hsa04261/hsa:207%09red
mTOR signaling pathway	KEGG PATHWAY	hsa04150	1	153	0.0792313	0.084014	AKT1	http://www.genome.jp/kegg-bin/show_pathway?hsa04150/hsa:207%09red
Hippo signaling pathway	KEGG PATHWAY	hsa04390	1	154	0.0797257	0.084014	TGFB1	http://www.genome.jp/kegg-bin/show_pathway?hsa04390/hsa:7040%09red
Cushing syndrome	KEGG PATHWAY	hsa04934	1	155	0.0802198	0.084014	CDK2	http://www.genome.jp/kegg-bin/show_pathway?hsa04934/hsa:1017%09red
Necroptosis	KEGG PATHWAY	hsa04217	1	162	0.0836718	0.0864608	CASP8	http://www.genome.jp/kegg-bin/show_pathway?hsa04217/hsa:841%09red
Jak-STAT signaling pathway	KEGG PATHWAY	hsa04630	1	162	0.0836718	0.0864608	AKT1	http://www.genome.jp/kegg-bin/show_pathway?hsa04630/hsa:207%09red
cGMP-PKG signaling pathway	KEGG PATHWAY	hsa04022	1	167	0.0861298	0.0884114	AKT1	http://www.genome.jp/kegg-bin/show_pathway?hsa04022/hsa:207%09red
Tight junction	KEGG PATHWAY	hsa04530	1	170	0.0876017	0.0893307	JUN	http://www.genome.jp/kegg-bin/show_pathway?hsa04530/hsa:3725%09red
Thermogenesis	KEGG PATHWAY	hsa04714	1	231	0.117044	0.118574	PPARG	http://www.genome.jp/kegg-bin/show_pathway?hsa04714/hsa:5468%09red
Cytokine-cytokine receptor interaction	KEGG PATHWAY	hsa04060	1	294	0.1465	0.147452	TGFB1	http://www.genome.jp/kegg-bin/show_pathway?hsa04060/hsa:7040%09red
Metabolic pathways	KEGG PATHWAY	hsa01100	2	1433	0.177931	0.177931	PTGS2|AR	http://www.genome.jp/kegg-bin/show_pathway?hsa01100/hsa:5743%09red/hsa:231%09red
--------------------
#Term	Database	ID	Input number	Background number	P-Value	Corrected P-Value	Input	Hyperlink
--------------------
#Term	Database	ID	Input number	Background number	P-Value	Corrected P-Value	Input	Hyperlink
--------------------
