# Supplementary material for: Network Pharmacology and Molecular Docking Combined to Analyze the Molecular and Pharmacological Mechanism of Pinellia ternata in the Treatment of Hypertension
Source: Curr Issues Mol Biol. 2021 May 1;43(1):6. doi: 10.3390/cimb43010006 (PMC8929114; doi:10.3390/cimb43010006)
Supplement: Supplementary file 1 [file cimb-43-00006-s001.zip › Supplementary Table 6.xls]

## Sheet: Module2-BP
Biological Process
GO-ID	p-value	corr p-value	x	n	X	N	Description	Genes in test set
7187	1.384e-11	1.4615e-08	8	248	16	17956	G protein-coupled receptor signaling pathway, coupled to cyclic nucleotide second messenger	CHRM3|CHRM1|CHRM5|HTR2C|ADRA1D|HTR2A|ADRA1B|ADRA1A
98664	7.7031e-11	2.1651e-08	5	34	16	17956	G protein-coupled serotonin receptor signaling pathway	CHRM3|CHRM1|CHRM5|HTR2C|HTR2A
71868	1.5288e-10	2.1651e-08	6	96	16	17956	cellular response to monoamine stimulus	CHRM3|CHRM1|CHRM5|HTR2C|HTR2A|PRKACA
71870	1.5288e-10	2.1651e-08	6	96	16	17956	cellular response to catecholamine stimulus	CHRM3|CHRM1|CHRM5|HTR2C|HTR2A|PRKACA
7267	1.5585e-10	2.1651e-08	11	1109	16	17956	cell-cell signaling	CHRM3|CHRM1|CHRM5|HTR2C|ADRA1D|NFATC1|HTR2A|ADRA1B|SLC6A2|ADRA1A|SLC6A3
7210	1.5898e-10	2.1651e-08	5	39	16	17956	serotonin receptor signaling pathway	CHRM3|CHRM1|CHRM5|HTR2C|HTR2A
7200	1.7343e-10	2.1651e-08	6	98	16	17956	phospholipase C-activating G protein-coupled receptor signaling pathway	CHRM1|HTR2C|ADRA1D|HTR2A|ADRA1B|ADRA1A
71867	1.8453e-10	2.1651e-08	6	99	16	17956	response to monoamine	CHRM3|CHRM1|CHRM5|HTR2C|HTR2A|PRKACA
71869	1.8453e-10	2.1651e-08	6	99	16	17956	response to catecholamine	CHRM3|CHRM1|CHRM5|HTR2C|HTR2A|PRKACA
19229	1.6243e-09	1.4588e-07	5	61	16	17956	regulation of vasoconstriction	CHRM3|ADRA1D|HTR2A|ADRA1B|ADRA1A
35296	1.7219e-09	1.4588e-07	6	143	16	17956	regulation of tube diameter	CHRM3|ADRA1D|HTR2A|ADRA1B|ADRA1A|SLC6A4
97746	1.7219e-09	1.4588e-07	6	143	16	17956	regulation of blood vessel diameter	CHRM3|ADRA1D|HTR2A|ADRA1B|ADRA1A|SLC6A4
35150	1.7959e-09	1.4588e-07	6	144	16	17956	regulation of tube size	CHRM3|ADRA1D|HTR2A|ADRA1B|ADRA1A|SLC6A4
15844	2.4929e-09	1.8804e-07	4	21	16	17956	monoamine transport	CHRM5|SLC6A2|SLC6A3|SLC6A4
150099	5.7984e-09	4.0378e-07	3	5	16	17956	neuron-glial cell signaling	ADRA1D|ADRA1B|ADRA1A
1903351	6.5003e-09	4.0378e-07	5	80	16	17956	cellular response to dopamine	CHRM3|CHRM1|CHRM5|HTR2C|HTR2A
1903350	6.5003e-09	4.0378e-07	5	80	16	17956	response to dopamine	CHRM3|CHRM1|CHRM5|HTR2C|HTR2A
19932	9.3337e-09	5.4758e-07	7	347	16	17956	second-messenger-mediated signaling	CHRM3|HTR2C|ADRA1D|NFATC1|ADRA1B|PRKACA|ADRA1A
44057	1.1412e-08	5.9771e-07	8	579	16	17956	regulation of system process	CHRM3|HTR2C|ADRA1D|PRKCA|HTR2A|ADRA1B|PRKACA|ADRA1A
1996	1.1591e-08	5.9771e-07	3	6	16	17956	positive regulation of heart rate by epinephrine-norepinephrine	ADRA1D|ADRA1B|ADRA1A
14070	1.1886e-08	5.9771e-07	9	870	16	17956	response to organic cyclic compound	CHRM3|CHRM1|MAOB|CHRM5|HTR2C|HTR2A|PRKACA|SLC6A3|SLC6A4
42133	1.3036e-08	6.2573e-07	4	31	16	17956	neurotransmitter metabolic process	MAOB|MAOA|SLC6A3|SLC6A4
45907	1.6935e-08	7.6141e-07	4	33	16	17956	positive regulation of vasoconstriction	ADRA1D|HTR2A|ADRA1B|ADRA1A
1505	1.7305e-08	7.6141e-07	6	210	16	17956	regulation of neurotransmitter levels	MAOB|MAOA|HTR2A|SLC6A2|SLC6A3|SLC6A4
3321	2.0273e-08	8.5478e-07	3	7	16	17956	positive regulation of blood pressure by epinephrine-norepinephrine	ADRA1D|ADRA1B|ADRA1A
7188	2.1046e-08	8.5478e-07	6	217	16	17956	adenylate cyclase-modulating G protein-coupled receptor signaling pathway	CHRM3|CHRM1|CHRM5|ADRA1D|ADRA1B|ADRA1A
98916	2.7534e-08	1.0384e-06	7	406	16	17956	anterograde trans-synaptic signaling	CHRM3|CHRM1|CHRM5|HTR2C|HTR2A|SLC6A2|SLC6A3
7268	2.7534e-08	1.0384e-06	7	406	16	17956	chemical synaptic transmission	CHRM3|CHRM1|CHRM5|HTR2C|HTR2A|SLC6A2|SLC6A3
7197	3.2418e-08	1.1411e-06	3	8	16	17956	adenylate cyclase-inhibiting G protein-coupled acetylcholine receptor signaling pathway	CHRM3|CHRM1|CHRM5
42420	3.2418e-08	1.1411e-06	3	8	16	17956	dopamine catabolic process	MAOB|MAOA|SLC6A3
99537	3.5903e-08	1.223e-06	7	422	16	17956	trans-synaptic signaling	CHRM3|CHRM1|CHRM5|HTR2C|HTR2A|SLC6A2|SLC6A3
65008	4.8937e-08	1.6149e-06	14	3966	16	17956	regulation of biological quality	CHRM3|CHRM1|MAOB|MAOA|HTR2C|ADRA1D|PRKCA|HTR2A|ADRA1B|SLC6A2|ADRA1A|SLC6A3|SLC6A4|PRKACA
99536	5.409e-08	1.7309e-06	7	448	16	17956	synaptic signaling	CHRM3|CHRM1|CHRM5|HTR2C|HTR2A|SLC6A2|SLC6A3
3018	6.6046e-08	1.9805e-06	6	263	16	17956	vascular process in circulatory system	CHRM3|ADRA1D|HTR2A|ADRA1B|ADRA1A|SLC6A4
19614	6.9393e-08	1.9805e-06	3	10	16	17956	catechol-containing compound catabolic process	MAOB|MAOA|SLC6A3
42424	6.9393e-08	1.9805e-06	3	10	16	17956	catecholamine catabolic process	MAOB|MAOA|SLC6A3
1993	6.9393e-08	1.9805e-06	3	10	16	17956	regulation of systemic arterial blood pressure by norepinephrine-epinephrine	ADRA1D|ADRA1B|ADRA1A
71407	1.012e-07	2.8123e-06	7	491	16	17956	cellular response to organic cyclic compound	CHRM3|CHRM1|CHRM5|HTR2C|HTR2A|PRKACA|SLC6A4
1903522	1.1781e-07	3.1899e-06	6	290	16	17956	regulation of blood circulation	CHRM3|ADRA1D|HTR2A|ADRA1B|PRKACA|ADRA1A
19336	1.2708e-07	3.355e-06	3	12	16	17956	phenol-containing compound catabolic process	MAOB|MAOA|SLC6A3
43410	1.516e-07	3.9047e-06	7	521	16	17956	positive regulation of MAPK cascade	HTR2C|ADRA1D|PRKCA|HTR2A|ADRA1B|PRKACA|ADRA1A
15872	1.6512e-07	4.1515e-06	3	13	16	17956	dopamine transport	CHRM5|SLC6A2|SLC6A3
51480	2.0299e-07	4.9851e-06	6	318	16	17956	regulation of cytosolic calcium ion concentration	HTR2C|ADRA1D|HTR2A|ADRA1B|PRKACA|ADRA1A
51937	2.624e-07	6.2976e-06	3	15	16	17956	catecholamine transport	CHRM5|SLC6A2|SLC6A3
71417	3.6921e-07	8.4981e-06	7	594	16	17956	cellular response to organonitrogen compound	CHRM3|CHRM1|CHRM5|HTR2C|HTR2A|PRKACA|SLC6A4
10033	3.7018e-07	8.4981e-06	12	2958	16	17956	response to organic substance	CHRM3|CHRM1|MAOB|MAOA|CHRM5|HTR2C|PRKCA|HTR2A|PRKACA|ADRA1A|SLC6A3|SLC6A4
98810	4.6982e-07	1.0556e-05	3	18	16	17956	neurotransmitter reuptake	SLC6A2|SLC6A3|SLC6A4
7213	5.5761e-07	1.2267e-05	3	19	16	17956	G protein-coupled acetylcholine receptor signaling pathway	CHRM3|CHRM1|CHRM5
42493	6.0528e-07	1.3044e-05	6	383	16	17956	response to drug	MAOB|HTR2C|HTR2A|SLC6A2|ADRA1A|SLC6A4
10243	6.808e-07	1.4195e-05	8	983	16	17956	response to organonitrogen compound	CHRM3|CHRM1|CHRM5|HTR2C|HTR2A|PRKACA|SLC6A3|SLC6A4
1901699	6.8555e-07	1.4195e-05	7	651	16	17956	cellular response to nitrogen compound	CHRM3|CHRM1|CHRM5|HTR2C|HTR2A|PRKACA|SLC6A4
9719	7.0062e-07	1.4228e-05	9	1396	16	17956	response to endogenous stimulus	CHRM3|CHRM1|MAOB|CHRM5|HTR2C|HTR2A|PRKACA|ADRA1A|SLC6A4
70374	7.2844e-07	1.4514e-05	5	205	16	17956	positive regulation of ERK1 and ERK2 cascade	HTR2C|PRKCA|HTR2A|PRKACA|ADRA1A
71880	7.6452e-07	1.4765e-05	3	21	16	17956	adenylate cyclase-activating adrenergic receptor signaling pathway	ADRA1D|ADRA1B|ADRA1A
8015	7.6899e-07	1.4765e-05	6	399	16	17956	blood circulation	CHRM3|ADRA1D|HTR2A|ADRA1B|ADRA1A|SLC6A4
71875	1.0169e-06	1.9176e-05	3	23	16	17956	adrenergic receptor signaling pathway	ADRA1D|ADRA1B|ADRA1A
6874	1.0666e-06	1.9761e-05	6	422	16	17956	cellular calcium ion homeostasis	HTR2C|ADRA1D|HTR2A|ADRA1B|PRKACA|ADRA1A
43408	1.0957e-06	1.9949e-05	7	698	16	17956	regulation of MAPK cascade	HTR2C|ADRA1D|PRKCA|HTR2A|ADRA1B|PRKACA|ADRA1A
90257	1.1534e-06	2.0644e-05	5	225	16	17956	regulation of muscle system process	CHRM3|PRKCA|ADRA1B|PRKACA|ADRA1A
1901698	1.2789e-06	2.2508e-05	8	1068	16	17956	response to nitrogen compound	CHRM3|CHRM1|CHRM5|HTR2C|HTR2A|PRKACA|SLC6A3|SLC6A4
55074	1.3074e-06	2.2632e-05	6	437	16	17956	calcium ion homeostasis	HTR2C|ADRA1D|HTR2A|ADRA1B|PRKACA|ADRA1A
3008	1.4966e-06	2.549e-05	10	2044	16	17956	system process	CHRM3|CHRM1|CHRM5|ADRA1D|HTR2A|ADRA1B|PRKACA|ADRA1A|SLC6A3|SLC6A4
2027	1.5656e-06	2.6243e-05	4	100	16	17956	regulation of heart rate	ADRA1D|ADRA1B|PRKACA|ADRA1A
72503	1.6534e-06	2.7227e-05	6	455	16	17956	cellular divalent inorganic cation homeostasis	HTR2C|ADRA1D|HTR2A|ADRA1B|PRKACA|ADRA1A
10460	1.6759e-06	2.7227e-05	3	27	16	17956	positive regulation of heart rate	ADRA1D|ADRA1B|ADRA1A
1901700	1.8239e-06	2.9183e-05	9	1563	16	17956	response to oxygen-containing compound	CHRM3|CHRM1|MAOB|CHRM5|HTR2C|HTR2A|PRKACA|SLC6A3|SLC6A4
1504	1.876e-06	2.9568e-05	3	28	16	17956	neurotransmitter uptake	SLC6A2|SLC6A3|SLC6A4
10613	2.0913e-06	3.185e-05	3	29	16	17956	positive regulation of cardiac muscle hypertrophy	PRKCA|PRKACA|ADRA1A
95500	2.0913e-06	3.185e-05	3	29	16	17956	acetylcholine receptor signaling pathway	CHRM3|CHRM1|CHRM5
72507	2.2014e-06	3.185e-05	6	478	16	17956	divalent inorganic cation homeostasis	HTR2C|ADRA1D|HTR2A|ADRA1B|PRKACA|ADRA1A
10513	2.2321e-06	3.185e-05	2	3	16	17956	positive regulation of phosphatidylinositol biosynthetic process	HTR2C|HTR2A
35408	2.2321e-06	3.185e-05	2	3	16	17956	histone H3-T6 phosphorylation	PRKCA|PRKACA
7208	2.2321e-06	3.185e-05	2	3	16	17956	phospholipase C-activating serotonin receptor signaling pathway	HTR2C|HTR2A
2000707	2.2321e-06	3.185e-05	2	3	16	17956	positive regulation of dense core granule biogenesis	PRKCA|PRKACA
14742	2.3224e-06	3.185e-05	3	30	16	17956	positive regulation of muscle hypertrophy	PRKCA|PRKACA|ADRA1A
42310	2.3224e-06	3.185e-05	3	30	16	17956	vasoconstriction	HTR2A|ADRA1A|SLC6A4
42417	2.3224e-06	3.185e-05	3	30	16	17956	dopamine metabolic process	MAOB|MAOA|SLC6A3
42221	2.4358e-06	3.2976e-05	13	4333	16	17956	response to chemical	CHRM3|CHRM1|MAOB|MAOA|CHRM5|HTR2C|PRKCA|HTR2A|SLC6A2|ADRA1A|SLC6A3|SLC6A4|PRKACA
1905145	2.5698e-06	3.3529e-05	3	31	16	17956	cellular response to acetylcholine	CHRM3|CHRM1|CHRM5
1905144	2.5698e-06	3.3529e-05	3	31	16	17956	response to acetylcholine	CHRM3|CHRM1|CHRM5
3013	2.5719e-06	3.3529e-05	6	491	16	17956	circulatory system process	CHRM3|ADRA1D|HTR2A|ADRA1B|ADRA1A|SLC6A4
35556	2.7902e-06	3.5933e-05	9	1644	16	17956	intracellular signal transduction	CHRM3|HTR2C|ADRA1D|NFATC1|PRKCA|HTR2A|ADRA1B|PRKACA|ADRA1A
23052	3.1961e-06	4.0664e-05	14	5420	16	17956	signaling	CHRM3|CHRM1|MAOA|CHRM5|HTR2C|ADRA1D|NFATC1|PRKCA|HTR2A|ADRA1B|SLC6A2|ADRA1A|SLC6A3|PRKACA
7204	3.3174e-06	4.1704e-05	5	279	16	17956	positive regulation of cytosolic calcium ion concentration	HTR2C|ADRA1D|HTR2A|ADRA1B|ADRA1A
6812	3.4308e-06	4.2622e-05	7	828	16	17956	cation transport	CHRM5|HTR2C|HTR2A|SLC6A2|ADRA1A|SLC6A3|SLC6A4
90066	3.7052e-06	4.4805e-05	6	523	16	17956	regulation of anatomical structure size	CHRM3|ADRA1D|HTR2A|ADRA1B|ADRA1A|SLC6A4
98926	3.7337e-06	4.4805e-05	3	35	16	17956	postsynaptic signal transduction	CHRM3|CHRM1|CHRM5
1903725	3.7337e-06	4.4805e-05	3	35	16	17956	regulation of phospholipid metabolic process	CHRM5|HTR2C|HTR2A
7154	3.9265e-06	4.6588e-05	14	5505	16	17956	cell communication	CHRM3|CHRM1|MAOA|CHRM5|HTR2C|ADRA1D|NFATC1|PRKCA|HTR2A|ADRA1B|SLC6A2|ADRA1A|SLC6A3|PRKACA
70372	4.0077e-06	4.7024e-05	5	290	16	17956	regulation of ERK1 and ERK2 cascade	HTR2C|PRKCA|HTR2A|PRKACA|ADRA1A
2000705	4.4619e-06	5.1777e-05	2	4	16	17956	regulation of dense core granule biogenesis	PRKCA|PRKACA
19725	4.5512e-06	5.2239e-05	7	864	16	17956	cellular homeostasis	HTR2C|ADRA1D|HTR2A|ADRA1B|PRKACA|SLC6A2|ADRA1A
6875	4.7995e-06	5.3976e-05	6	547	16	17956	cellular metal ion homeostasis	HTR2C|ADRA1D|HTR2A|ADRA1B|PRKACA|ADRA1A
97756	4.8046e-06	5.3976e-05	3	38	16	17956	negative regulation of blood vessel diameter	HTR2A|ADRA1A|SLC6A4
45823	5.2022e-06	5.7827e-05	3	39	16	17956	positive regulation of heart contraction	ADRA1D|ADRA1B|ADRA1A
50896	5.5285e-06	6.0813e-05	16	8430	16	17956	response to stimulus	CHRM3|CHRM1|MAOB|MAOA|CHRM5|HTR2C|ADRA1D|NFATC1|PRKCA|HTR2A|ADRA1B|SLC6A2|ADRA1A|SLC6A3|SLC6A4|PRKACA
32501	6.0581e-06	6.4652e-05	15	6907	16	17956	multicellular organismal process	CHRM3|CHRM1|MAOB|CHRM5|HTR2C|ADRA1D|NFATC1|PRKCA|HTR2A|ADRA1B|SLC6A2|ADRA1A|SLC6A3|SLC6A4|PRKACA
45777	6.0614e-06	6.4652e-05	3	41	16	17956	positive regulation of blood pressure	ADRA1D|ADRA1B|ADRA1A
1903524	6.0614e-06	6.4652e-05	3	41	16	17956	positive regulation of blood circulation	ADRA1D|ADRA1B|ADRA1A
7186	6.1223e-06	6.4652e-05	8	1315	16	17956	G protein-coupled receptor signaling pathway	CHRM3|CHRM1|CHRM5|HTR2C|ADRA1D|HTR2A|ADRA1B|ADRA1A
2159	7.4326e-06	7.475e-05	2	5	16	17956	desmosome assembly	PRKCA|PRKACA
10511	7.4326e-06	7.475e-05	2	5	16	17956	regulation of phosphatidylinositol biosynthetic process	HTR2C|HTR2A
51583	7.4326e-06	7.475e-05	2	5	16	17956	dopamine uptake involved in synaptic transmission	SLC6A2|SLC6A3
51934	7.4326e-06	7.475e-05	2	5	16	17956	catecholamine uptake involved in synaptic transmission	SLC6A2|SLC6A3
46541	7.4326e-06	7.475e-05	2	5	16	17956	saliva secretion	CHRM3|CHRM1
6584	8.0511e-06	7.9458e-05	3	45	16	17956	catecholamine metabolic process	MAOB|MAOA|SLC6A3
9712	8.0511e-06	7.9458e-05	3	45	16	17956	catechol-containing compound metabolic process	MAOB|MAOA|SLC6A3
15850	8.5174e-06	8.3281e-05	4	153	16	17956	organic hydroxy compound transport	CHRM5|SLC6A2|SLC6A3|SLC6A4
55065	9.4065e-06	9.1131e-05	6	615	16	17956	metal ion homeostasis	HTR2C|ADRA1D|HTR2A|ADRA1B|PRKACA|ADRA1A
1903530	9.583e-06	9.1996e-05	6	617	16	17956	regulation of secretion by cell	MAOB|HTR2C|PRKCA|HTR2A|PRKACA|SLC6A4
3044	9.7974e-06	9.2676e-05	3	48	16	17956	regulation of systemic arterial blood pressure mediated by a chemical signal	ADRA1D|ADRA1B|ADRA1A
51240	9.8659e-06	9.2676e-05	8	1402	16	17956	positive regulation of multicellular organismal process	CHRM3|ADRA1D|PRKCA|HTR2A|ADRA1B|PRKACA|ADRA1A|SLC6A3
6937	9.9171e-06	9.2676e-05	4	159	16	17956	regulation of muscle contraction	CHRM3|ADRA1B|PRKACA|ADRA1A
30003	1.0506e-05	9.7319e-05	6	627	16	17956	cellular cation homeostasis	HTR2C|ADRA1D|HTR2A|ADRA1B|PRKACA|ADRA1A
51620	1.1143e-05	0.00010144	2	6	16	17956	norepinephrine uptake	SLC6A2|SLC6A3
106071	1.1143e-05	0.00010144	2	6	16	17956	positive regulation of adenylate cyclase-activating G protein-coupled receptor signaling pathway	PRKCA|PRKACA
30001	1.1708e-05	0.00010567	6	639	16	17956	metal ion transport	HTR2C|HTR2A|SLC6A2|ADRA1A|SLC6A3|SLC6A4
6873	1.1919e-05	0.00010666	6	641	16	17956	cellular ion homeostasis	HTR2C|ADRA1D|HTR2A|ADRA1B|PRKACA|ADRA1A
1902533	1.2097e-05	0.00010735	7	1002	16	17956	positive regulation of intracellular signal transduction	HTR2C|ADRA1D|PRKCA|HTR2A|ADRA1B|PRKACA|ADRA1A
1934	1.2337e-05	0.00010857	7	1005	16	17956	positive regulation of protein phosphorylation	HTR2C|ADRA1D|PRKCA|HTR2A|ADRA1B|PRKACA|ADRA1A
10611	1.4005e-05	0.00012222	3	54	16	17956	regulation of cardiac muscle hypertrophy	PRKCA|PRKACA|ADRA1A
15874	1.5592e-05	0.00013478	2	7	16	17956	norepinephrine transport	SLC6A2|SLC6A3
51046	1.5735e-05	0.00013478	6	673	16	17956	regulation of secretion	MAOB|HTR2C|PRKCA|HTR2A|PRKACA|SLC6A4
19935	1.5827e-05	0.00013478	4	179	16	17956	cyclic-nucleotide-mediated signaling	HTR2C|ADRA1D|ADRA1B|ADRA1A
14743	1.6494e-05	0.00013837	3	57	16	17956	regulation of muscle hypertrophy	PRKCA|PRKACA|ADRA1A
51239	1.651e-05	0.00013837	10	2652	16	17956	regulation of multicellular organismal process	CHRM3|HTR2C|ADRA1D|PRKCA|HTR2A|ADRA1B|PRKACA|ADRA1A|SLC6A3|SLC6A4
1901701	1.685e-05	0.00014011	7	1054	16	17956	cellular response to oxygen-containing compound	CHRM3|CHRM1|CHRM5|HTR2C|HTR2A|PRKACA|SLC6A4
48518	1.9176e-05	0.0001582	14	6211	16	17956	positive regulation of biological process	CHRM3|CHRM1|MAOB|MAOA|HTR2C|ADRA1D|NFATC1|PRKCA|HTR2A|ADRA1B|ADRA1A|SLC6A3|SLC6A4|PRKACA
55080	1.9519e-05	0.00015855	6	699	16	17956	cation homeostasis	HTR2C|ADRA1D|HTR2A|ADRA1B|PRKACA|ADRA1A
42327	1.9519e-05	0.00015855	7	1078	16	17956	positive regulation of phosphorylation	HTR2C|ADRA1D|PRKCA|HTR2A|ADRA1B|PRKACA|ADRA1A
9967	2.0136e-05	0.00016232	8	1544	16	17956	positive regulation of signal transduction	MAOA|HTR2C|ADRA1D|PRKCA|HTR2A|ADRA1B|PRKACA|ADRA1A
43269	2.0655e-05	0.00016375	6	706	16	17956	regulation of ion transport	CHRM3|CHRM1|MAOB|HTR2A|PRKACA|SLC6A4
35405	2.0779e-05	0.00016375	2	8	16	17956	histone-threonine phosphorylation	PRKCA|PRKACA
14062	2.0779e-05	0.00016375	2	8	16	17956	regulation of serotonin secretion	MAOB|SLC6A4
98771	2.1158e-05	0.0001655	6	709	16	17956	inorganic ion homeostasis	HTR2C|ADRA1D|HTR2A|ADRA1B|PRKACA|ADRA1A
71495	2.6526e-05	0.00020433	7	1130	16	17956	cellular response to endogenous stimulus	CHRM3|CHRM1|CHRM5|HTR2C|HTR2A|PRKACA|SLC6A4
55082	2.6553e-05	0.00020433	6	738	16	17956	cellular chemical homeostasis	HTR2C|ADRA1D|HTR2A|ADRA1B|PRKACA|ADRA1A
34351	2.6702e-05	0.00020433	2	9	16	17956	negative regulation of glial cell apoptotic process	PRKCA|PRKACA
10562	2.956e-05	0.00022296	7	1149	16	17956	positive regulation of phosphorus metabolic process	HTR2C|ADRA1D|PRKCA|HTR2A|ADRA1B|PRKACA|ADRA1A
45937	2.956e-05	0.00022296	7	1149	16	17956	positive regulation of phosphate metabolic process	HTR2C|ADRA1D|PRKCA|HTR2A|ADRA1B|PRKACA|ADRA1A
60402	3.1973e-05	0.00023777	3	71	16	17956	calcium ion transport into cytosol	HTR2C|HTR2A|ADRA1A
7589	3.1973e-05	0.00023777	3	71	16	17956	body fluid secretion	CHRM3|CHRM1|SLC6A3
90493	3.336e-05	0.00024129	2	10	16	17956	catecholamine uptake	SLC6A2|SLC6A3
90494	3.336e-05	0.00024129	2	10	16	17956	dopamine uptake	SLC6A2|SLC6A3
31666	3.336e-05	0.00024129	2	10	16	17956	positive regulation of lipopolysaccharide-mediated signaling pathway	PRKCA|PRKACA
71073	3.336e-05	0.00024129	2	10	16	17956	positive regulation of phospholipid biosynthetic process	HTR2C|HTR2A
22600	3.6205e-05	0.00025723	3	74	16	17956	digestive system process	CHRM3|CHRM1|CHRM5
55117	3.6205e-05	0.00025723	3	74	16	17956	regulation of cardiac muscle contraction	ADRA1B|PRKACA|ADRA1A
50801	3.6295e-05	0.00025723	6	780	16	17956	ion homeostasis	HTR2C|ADRA1D|HTR2A|ADRA1B|PRKACA|ADRA1A
1901616	3.7693e-05	0.00026536	3	75	16	17956	organic hydroxy compound catabolic process	MAOB|MAOA|SLC6A3
2934	4.0752e-05	0.0002825	2	11	16	17956	desmosome organization	PRKCA|PRKACA
34350	4.0752e-05	0.0002825	2	11	16	17956	regulation of glial cell apoptotic process	PRKCA|PRKACA
10647	4.0931e-05	0.0002825	8	1701	16	17956	positive regulation of cell communication	MAOA|HTR2C|ADRA1D|PRKCA|HTR2A|ADRA1B|PRKACA|ADRA1A
23056	4.2174e-05	0.00028884	8	1708	16	17956	positive regulation of signaling	MAOA|HTR2C|ADRA1D|PRKCA|HTR2A|ADRA1B|PRKACA|ADRA1A
7193	4.2397e-05	0.00028884	3	78	16	17956	adenylate cyclase-inhibiting G protein-coupled receptor signaling pathway	CHRM3|CHRM1|CHRM5
31401	4.521e-05	0.00030604	7	1227	16	17956	positive regulation of protein modification process	HTR2C|ADRA1D|PRKCA|HTR2A|ADRA1B|PRKACA|ADRA1A
43502	4.5737e-05	0.00030764	3	80	16	17956	regulation of muscle adaptation	PRKCA|PRKACA|ADRA1A
42135	4.8877e-05	0.00032667	2	12	16	17956	neurotransmitter catabolic process	MAOB|MAOA
50878	5.2474e-05	0.00034851	5	494	16	17956	regulation of body fluid levels	CHRM3|CHRM1|PRKCA|PRKACA|SLC6A3
8016	5.3247e-05	0.00035143	4	244	16	17956	regulation of heart contraction	ADRA1D|ADRA1B|PRKACA|ADRA1A
51049	5.4207e-05	0.00035555	8	1768	16	17956	regulation of transport	CHRM3|CHRM1|MAOB|HTR2C|PRKCA|HTR2A|PRKACA|SLC6A4
7077	5.7733e-05	0.00037403	2	13	16	17956	mitotic nuclear envelope disassembly	PRKCA|PRKACA
106070	5.7733e-05	0.00037403	2	13	16	17956	regulation of adenylate cyclase-activating G protein-coupled receptor signaling pathway	PRKCA|PRKACA
18958	6.0824e-05	0.00038927	3	88	16	17956	phenol-containing compound metabolic process	MAOB|MAOA|SLC6A3
60401	6.0824e-05	0.00038927	3	88	16	17956	cytosolic calcium ion transport	HTR2C|HTR2A|ADRA1A
6942	6.2911e-05	0.00040021	3	89	16	17956	regulation of striated muscle contraction	ADRA1B|PRKACA|ADRA1A
19220	6.4775e-05	0.00040879	8	1812	16	17956	regulation of phosphate metabolic process	CHRM5|HTR2C|ADRA1D|PRKCA|HTR2A|ADRA1B|PRKACA|ADRA1A
51174	6.5034e-05	0.00040879	8	1813	16	17956	regulation of phosphorus metabolic process	CHRM5|HTR2C|ADRA1D|PRKCA|HTR2A|ADRA1B|PRKACA|ADRA1A
1963	6.7321e-05	0.00042065	2	14	16	17956	synaptic transmission, dopaminergic	SLC6A2|SLC6A3
45651	7.7637e-05	0.00047719	2	15	16	17956	positive regulation of macrophage differentiation	PRKCA|PRKACA
1903727	7.7637e-05	0.00047719	2	15	16	17956	positive regulation of phospholipid metabolic process	HTR2C|HTR2A
6811	7.7725e-05	0.00047719	7	1335	16	17956	ion transport	CHRM5|HTR2C|HTR2A|SLC6A2|ADRA1A|SLC6A3|SLC6A4
3073	8.1323e-05	0.0004964	3	97	16	17956	regulation of systemic arterial blood pressure	ADRA1D|ADRA1B|ADRA1A
71071	8.8682e-05	0.00053821	2	16	16	17956	regulation of phospholipid biosynthetic process	HTR2C|HTR2A
98662	0.00010006	0.00059595	5	566	16	17956	inorganic cation transmembrane transport	HTR2C|HTR2A|SLC6A2|SLC6A3|SLC6A4
32941	0.00010045	0.00059595	2	17	16	17956	secretion by tissue	CHRM3|CHRM1
30397	0.00010045	0.00059595	2	17	16	17956	membrane disassembly	PRKCA|PRKACA
51081	0.00010045	0.00059595	2	17	16	17956	nuclear envelope disassembly	PRKCA|PRKACA
42136	0.00011295	0.00066636	2	18	16	17956	neurotransmitter biosynthetic process	SLC6A3|SLC6A4
1932	0.00013039	0.00076496	7	1448	16	17956	regulation of protein phosphorylation	HTR2C|ADRA1D|PRKCA|HTR2A|ADRA1B|PRKACA|ADRA1A
7586	0.00013141	0.00076669	3	114	16	17956	digestion	CHRM3|CHRM1|CHRM5
7165	0.00013757	0.00079821	12	5064	16	17956	signal transduction	CHRM3|CHRM1|MAOA|CHRM5|HTR2C|ADRA1D|NFATC1|PRKCA|HTR2A|ADRA1B|PRKACA|ADRA1A
45780	0.00014012	0.00079983	2	20	16	17956	positive regulation of bone resorption	PRKCA|PRKACA
42053	0.00014012	0.00079983	2	20	16	17956	regulation of dopamine metabolic process	MAOB|SLC6A3
42069	0.00014012	0.00079983	2	20	16	17956	regulation of catecholamine metabolic process	MAOB|SLC6A3
51282	0.00014555	0.00082635	3	118	16	17956	regulation of sequestering of calcium ion	HTR2C|HTR2A|PRKACA
10646	0.0001516	0.0008561	10	3398	16	17956	regulation of cell communication	MAOA|HTR2C|ADRA1D|NFATC1|PRKCA|HTR2A|ADRA1B|PRKACA|ADRA1A|SLC6A4
43902	0.00015479	0.00086486	2	21	16	17956	positive regulation of multi-organism process	PRKCA|PRKACA
43950	0.00015479	0.00086486	2	21	16	17956	positive regulation of cAMP-mediated signaling	PRKCA|PRKACA
35725	0.00015678	0.00087137	3	121	16	17956	sodium ion transmembrane transport	SLC6A2|SLC6A3|SLC6A4
23051	0.00016671	0.00091789	10	3435	16	17956	regulation of signaling	MAOA|HTR2C|ADRA1D|NFATC1|PRKCA|HTR2A|ADRA1B|PRKACA|ADRA1A|SLC6A4
98655	0.00016689	0.00091789	5	631	16	17956	cation transmembrane transport	HTR2C|HTR2A|SLC6A2|SLC6A3|SLC6A4
90330	0.00017018	0.00092635	2	22	16	17956	regulation of platelet aggregation	PRKCA|PRKACA
45649	0.00017018	0.00092635	2	22	16	17956	regulation of macrophage differentiation	PRKCA|PRKACA
98660	0.00020304	0.0010995	5	658	16	17956	inorganic ion transmembrane transport	HTR2C|HTR2A|SLC6A2|SLC6A3|SLC6A4
7189	0.00021665	0.0011673	3	135	16	17956	adenylate cyclase-activating G protein-coupled receptor signaling pathway	ADRA1D|ADRA1B|ADRA1A
6836	0.00023116	0.0012391	3	138	16	17956	neurotransmitter transport	SLC6A2|SLC6A3|SLC6A4
32270	0.00024648	0.0013146	7	1602	16	17956	positive regulation of cellular protein metabolic process	HTR2C|ADRA1D|PRKCA|HTR2A|ADRA1B|PRKACA|ADRA1A
45745	0.00025792	0.0013618	2	27	16	17956	positive regulation of G protein-coupled receptor signaling pathway	PRKCA|PRKACA
31664	0.00025792	0.0013618	2	27	16	17956	regulation of lipopolysaccharide-mediated signaling pathway	PRKCA|PRKACA
42325	0.00026128	0.001366	7	1617	16	17956	regulation of phosphorylation	HTR2C|ADRA1D|PRKCA|HTR2A|ADRA1B|PRKACA|ADRA1A
48878	0.00026129	0.001366	6	1113	16	17956	chemical homeostasis	HTR2C|ADRA1D|HTR2A|ADRA1B|PRKACA|ADRA1A
19722	0.00027841	0.0014483	3	147	16	17956	calcium-mediated signaling	CHRM3|NFATC1|PRKACA
42127	0.00028321	0.0014645	7	1638	16	17956	regulation of cell population proliferation	CHRM1|ADRA1D|PRKCA|HTR2A|PRKACA|ADRA1A|SLC6A4
42592	0.00028429	0.0014645	7	1639	16	17956	homeostatic process	HTR2C|ADRA1D|HTR2A|ADRA1B|PRKACA|SLC6A2|ADRA1A
45987	0.00031914	0.001636	2	30	16	17956	positive regulation of smooth muscle contraction	CHRM3|ADRA1A
48584	0.00032994	0.0016773	8	2277	16	17956	positive regulation of response to stimulus	MAOA|HTR2C|ADRA1D|PRKCA|HTR2A|ADRA1B|PRKACA|ADRA1A
51247	0.00033038	0.0016773	7	1679	16	17956	positive regulation of protein metabolic process	HTR2C|ADRA1D|PRKCA|HTR2A|ADRA1B|PRKACA|ADRA1A
34110	0.00034097	0.0017228	2	31	16	17956	regulation of homotypic cell-cell adhesion	PRKCA|PRKACA
19933	0.00034413	0.0017305	3	158	16	17956	cAMP-mediated signaling	ADRA1D|ADRA1B|ADRA1A
16572	0.00036352	0.0018193	2	32	16	17956	histone phosphorylation	PRKCA|PRKACA
71310	0.00036935	0.0018398	8	2314	16	17956	cellular response to organic substance	CHRM3|CHRM1|MAOA|CHRM5|HTR2C|HTR2A|PRKACA|SLC6A4
38128	0.00038677	0.0019175	2	33	16	17956	ERBB2 signaling pathway	PRKCA|PRKACA
50804	0.00039208	0.0019347	4	410	16	17956	modulation of chemical synaptic transmission	HTR2A|PRKACA|ADRA1A|SLC6A4
99177	0.00039572	0.0019436	4	411	16	17956	regulation of trans-synaptic signaling	HTR2A|PRKACA|ADRA1A|SLC6A4
9893	0.00040071	0.001959	10	3800	16	17956	positive regulation of metabolic process	MAOB|HTR2C|ADRA1D|NFATC1|PRKCA|HTR2A|ADRA1B|PRKACA|ADRA1A|SLC6A4
9966	0.00040897	0.0019834	9	3038	16	17956	regulation of signal transduction	MAOA|HTR2C|ADRA1D|NFATC1|PRKCA|HTR2A|ADRA1B|PRKACA|ADRA1A
7202	0.00041073	0.0019834	2	34	16	17956	activation of phospholipase C activity	HTR2A|ADRA1A
48522	0.00041133	0.0019834	12	5620	16	17956	positive regulation of cellular process	CHRM1|MAOB|MAOA|HTR2C|ADRA1D|NFATC1|PRKCA|HTR2A|ADRA1B|PRKACA|ADRA1A|SLC6A4
51716	0.00042655	0.0020474	13	6703	16	17956	cellular response to stimulus	CHRM3|CHRM1|MAOA|CHRM5|HTR2C|ADRA1D|NFATC1|PRKCA|HTR2A|ADRA1B|ADRA1A|SLC6A4|PRKACA
6814	0.00045644	0.0021797	3	174	16	17956	sodium ion transport	SLC6A2|SLC6A3|SLC6A4
1902531	0.00045822	0.0021797	7	1770	16	17956	regulation of intracellular signal transduction	HTR2C|ADRA1D|PRKCA|HTR2A|ADRA1B|PRKACA|ADRA1A
10543	0.00048684	0.0022995	2	37	16	17956	regulation of platelet activation	PRKCA|PRKACA
98657	0.00048778	0.0022995	3	178	16	17956	import into cell	SLC6A2|SLC6A3|SLC6A4
51173	0.0005588	0.0026227	9	3163	16	17956	positive regulation of nitrogen compound metabolic process	MAOB|HTR2C|ADRA1D|NFATC1|PRKCA|HTR2A|ADRA1B|PRKACA|ADRA1A
8217	0.00057209	0.0026731	3	188	16	17956	regulation of blood pressure	ADRA1D|ADRA1B|ADRA1A
9605	0.00057486	0.0026742	8	2466	16	17956	response to external stimulus	MAOB|HTR2C|PRKCA|HTR2A|PRKACA|ADRA1A|SLC6A3|SLC6A4
45933	0.00059817	0.0027705	2	41	16	17956	positive regulation of muscle contraction	CHRM3|ADRA1A
31399	0.00061556	0.0028385	7	1857	16	17956	regulation of protein modification process	HTR2C|ADRA1D|PRKCA|HTR2A|ADRA1B|PRKACA|ADRA1A
51209	0.00065804	0.0030212	2	43	16	17956	release of sequestered calcium ion into cytosol	HTR2C|HTR2A
45124	0.00068901	0.0031362	2	44	16	17956	regulation of bone resorption	PRKCA|PRKACA
51283	0.00068901	0.0031362	2	44	16	17956	negative regulation of sequestering of calcium ion	HTR2C|HTR2A
10863	0.00075305	0.0033984	2	46	16	17956	positive regulation of phospholipase C activity	HTR2A|ADRA1A
42220	0.00075305	0.0033984	2	46	16	17956	response to cocaine	HTR2A|SLC6A3
1900274	0.00081987	0.0036842	2	48	16	17956	regulation of phospholipase C activity	HTR2A|ADRA1A
90276	0.00083357	0.0037299	3	214	16	17956	regulation of peptide hormone secretion	HTR2C|PRKCA|PRKACA
50877	0.00084557	0.0037676	6	1384	16	17956	nervous system process	CHRM1|CHRM5|HTR2A|ADRA1A|SLC6A3|SLC6A4
31325	0.00085814	0.0038075	9	3345	16	17956	positive regulation of cellular metabolic process	MAOB|HTR2C|ADRA1D|NFATC1|PRKCA|HTR2A|ADRA1B|PRKACA|ADRA1A
6998	0.00088944	0.0038883	2	50	16	17956	nuclear envelope organization	PRKCA|PRKACA
14064	0.00089107	0.0038883	1	1	16	17956	positive regulation of serotonin secretion	SLC6A4
1985	0.00089107	0.0038883	1	1	16	17956	negative regulation of heart rate involved in baroreceptor response to increased systemic arterial blood pressure	ADRA1A
90067	0.00089107	0.0038883	1	1	16	17956	regulation of thalamus size	SLC6A4
48583	0.00089849	0.0039046	10	4178	16	17956	regulation of response to stimulus	MAOA|HTR2C|ADRA1D|NFATC1|PRKCA|HTR2A|ADRA1B|PRKACA|ADRA1A|SLC6A3
34220	0.00091757	0.0039711	5	913	16	17956	ion transmembrane transport	HTR2C|HTR2A|SLC6A2|SLC6A3|SLC6A4
46850	0.00092527	0.0039881	2	51	16	17956	regulation of bone remodeling	PRKCA|PRKACA
6939	0.00096178	0.0041119	2	52	16	17956	smooth muscle contraction	HTR2A|ADRA1A
43949	0.00096178	0.0041119	2	52	16	17956	regulation of cAMP-mediated signaling	PRKCA|PRKACA
8284	0.00099747	0.0042473	5	930	16	17956	positive regulation of cell population proliferation	ADRA1D|PRKCA|HTR2A|PRKACA|ADRA1A
43900	0.0010369	0.0043973	2	54	16	17956	regulation of multi-organism process	PRKCA|PRKACA
43536	0.0010754	0.0045426	2	55	16	17956	positive regulation of blood vessel endothelial cell migration	PRKCA|PRKACA
6816	0.0011061	0.0046537	3	236	16	17956	calcium ion transport	HTR2C|HTR2A|ADRA1A
32879	0.0011652	0.0048828	8	2734	16	17956	regulation of localization	CHRM3|CHRM1|MAOB|HTR2C|PRKCA|HTR2A|PRKACA|SLC6A4
2763	0.0011952	0.0049888	2	58	16	17956	positive regulation of myeloid leukocyte differentiation	PRKCA|PRKACA
10604	0.0012496	0.0051951	9	3515	16	17956	positive regulation of macromolecule metabolic process	HTR2C|ADRA1D|NFATC1|PRKCA|HTR2A|ADRA1B|PRKACA|ADRA1A|SLC6A4
6940	0.0012785	0.0052945	2	60	16	17956	regulation of smooth muscle contraction	CHRM3|ADRA1A
7610	0.0012969	0.0053499	4	564	16	17956	behavior	HTR2C|HTR2A|SLC6A3|SLC6A4
10518	0.0013645	0.0055849	2	62	16	17956	positive regulation of phospholipase activity	HTR2A|ADRA1A
97553	0.0013645	0.0055849	2	62	16	17956	calcium ion transmembrane import into cytosol	HTR2C|HTR2A
50805	0.0014085	0.0057427	2	63	16	17956	negative regulation of synaptic transmission	HTR2A|SLC6A4
7399	0.0015111	0.0061372	7	2154	16	17956	nervous system development	CHRM3|CHRM1|MAOB|PRKCA|PRKACA|SLC6A3|SLC6A4
45595	0.0015257	0.006173	6	1548	16	17956	regulation of cell differentiation	HTR2C|NFATC1|PRKCA|HTR2A|PRKACA|SLC6A4
46883	0.0015943	0.006426	3	268	16	17956	regulation of hormone secretion	HTR2C|PRKCA|PRKACA
45600	0.0016386	0.0065794	2	68	16	17956	positive regulation of fat cell differentiation	HTR2C|HTR2A
70887	0.001647	0.0065882	8	2878	16	17956	cellular response to chemical stimulus	CHRM3|CHRM1|MAOA|CHRM5|HTR2C|HTR2A|PRKACA|SLC6A4
7568	0.0017165	0.00684	3	275	16	17956	aging	HTR2A|ADRA1A|SLC6A3
21941	0.0017814	0.006929	1	2	16	17956	negative regulation of cerebellar granule cell precursor proliferation	SLC6A4
32227	0.0017814	0.006929	1	2	16	17956	negative regulation of synaptic transmission, dopaminergic	SLC6A4
1983	0.0017814	0.006929	1	2	16	17956	baroreceptor response to increased systemic arterial blood pressure	ADRA1A
1994	0.0017814	0.006929	1	2	16	17956	norepinephrine-epinephrine vasoconstriction involved in regulation of systemic arterial blood pressure	ADRA1A
1997	0.0017814	0.006929	1	2	16	17956	positive regulation of the force of heart contraction by epinephrine-norepinephrine	ADRA1A
33555	0.0017847	0.006929	2	71	16	17956	multicellular organismal response to stress	HTR2C|SLC6A2
38127	0.0017847	0.006929	2	71	16	17956	ERBB signaling pathway	PRKCA|PRKACA
70838	0.0018258	0.0070623	3	281	16	17956	divalent metal ion transport	HTR2C|HTR2A|ADRA1A
10517	0.0018855	0.0072667	2	73	16	17956	regulation of phospholipase activity	HTR2A|ADRA1A
72511	0.0019587	0.0075213	3	288	16	17956	divalent inorganic cation transport	HTR2C|HTR2A|ADRA1A
60193	0.0019889	0.0075821	2	75	16	17956	positive regulation of lipase activity	HTR2A|ADRA1A
34103	0.0019889	0.0075821	2	75	16	17956	regulation of tissue remodeling	PRKCA|PRKACA
90087	0.0019961	0.0075825	4	634	16	17956	regulation of peptide transport	CHRM1|HTR2C|PRKCA|PRKACA
18107	0.0020416	0.0077272	2	76	16	17956	peptidyl-threonine phosphorylation	PRKCA|PRKACA
50890	0.0022004	0.0082985	3	300	16	17956	cognition	CHRM1|HTR2A|SLC6A4
33238	0.0023149	0.0086995	2	81	16	17956	regulation of cellular amine metabolic process	MAOB|SLC6A3
46889	0.0024289	0.0090953	2	83	16	17956	positive regulation of lipid biosynthetic process	HTR2C|HTR2A
18210	0.0025454	0.0094981	2	85	16	17956	peptidyl-threonine modification	PRKCA|PRKACA
43397	0.002671	0.0097936	1	3	16	17956	regulation of corticotropin-releasing hormone secretion	HTR2C
97195	0.002671	0.0097936	1	3	16	17956	pilomotor reflex	ADRA1A
3099	0.002671	0.0097936	1	3	16	17956	positive regulation of the force of heart contraction by chemical signal	ADRA1A
7207	0.002671	0.0097936	1	3	16	17956	phospholipase C-activating G protein-coupled acetylcholine receptor signaling pathway	CHRM1
1978	0.002671	0.0097936	1	3	16	17956	regulation of systemic arterial blood pressure by carotid sinus baroreceptor feedback	ADRA1A

## Sheet: Module1-CC
Cellular Component
GO-ID	p-value	corr p-value	x	n	X	N	Description	Genes in test set
45121	3.8339e-09	2.1712e-07	7	320	16	18839	membrane raft	HTR2A|ADRA1B|PRKACA|SLC6A2|ADRA1A|SLC6A3|SLC6A4
98857	3.9177e-09	2.1712e-07	7	321	16	18839	membrane microdomain	HTR2A|ADRA1B|PRKACA|SLC6A2|ADRA1A|SLC6A3|SLC6A4
98590	5.727e-09	2.1712e-07	10	1195	16	18839	plasma membrane region	CHRM3|CHRM1|CHRM5|HTR2A|ADRA1B|PRKACA|SLC6A2|ADRA1A|SLC6A3|SLC6A4
5887	5.8681e-09	2.1712e-07	11	1634	16	18839	integral component of plasma membrane	CHRM3|CHRM1|CHRM5|HTR2C|ADRA1D|HTR2A|ADRA1B|SLC6A2|ADRA1A|SLC6A3|SLC6A4
97060	8.3338e-09	2.3573e-07	7	358	16	18839	synaptic membrane	CHRM3|CHRM1|CHRM5|HTR2A|SLC6A2|SLC6A3|SLC6A4
31226	9.5566e-09	2.3573e-07	11	1711	16	18839	intrinsic component of plasma membrane	CHRM3|CHRM1|CHRM5|HTR2C|ADRA1D|HTR2A|ADRA1B|SLC6A2|ADRA1A|SLC6A3|SLC6A4
44853	2.6898e-08	5.6871e-07	5	111	16	18839	plasma membrane raft	HTR2A|ADRA1B|PRKACA|ADRA1A|SLC6A3
42734	6.9285e-08	1.2818e-06	5	134	16	18839	presynaptic membrane	CHRM1|HTR2A|SLC6A2|SLC6A3|SLC6A4
36477	1.6501e-07	2.7135e-06	8	857	16	18839	somatodendritic compartment	CHRM3|CHRM1|CHRM5|HTR2C|HTR2A|PRKACA|SLC6A2|SLC6A3
45202	2.3882e-07	3.5346e-06	9	1291	16	18839	synapse	CHRM3|CHRM1|CHRM5|HTR2C|HTR2A|PRKACA|SLC6A2|SLC6A3|SLC6A4
43005	3.7287e-07	5.0167e-06	9	1360	16	18839	neuron projection	CHRM3|CHRM1|CHRM5|HTR2C|HTR2A|PRKACA|SLC6A2|SLC6A3|SLC6A4
5901	4.5227e-07	5.578e-06	4	77	16	18839	caveola	HTR2A|ADRA1B|ADRA1A|SLC6A3
16021	1.7171e-06	1.9548e-05	14	5426	16	18839	integral component of membrane	CHRM3|CHRM1|MAOB|MAOA|CHRM5|HTR2C|ADRA1D|HTR2A|ADRA1B|SLC6A2|ADRA1A|SLC6A3|SLC6A4|PRKACA
31224	2.555e-06	2.701e-05	14	5591	16	18839	intrinsic component of membrane	CHRM3|CHRM1|MAOB|MAOA|CHRM5|HTR2C|ADRA1D|HTR2A|ADRA1B|SLC6A2|ADRA1A|SLC6A3|SLC6A4|PRKACA
35866	4.0536e-06	3.529e-05	2	4	16	18839	alphav-beta3 integrin-PKCalpha complex	PRKCA|PRKACA
98665	4.0536e-06	3.529e-05	2	4	16	18839	serotonin receptor complex	HTR2C|HTR2A
98666	4.0536e-06	3.529e-05	2	4	16	18839	G protein-coupled serotonin receptor complex	HTR2C|HTR2A
30425	8.6692e-06	6.8754e-05	6	636	16	18839	dendrite	CHRM3|CHRM1|CHRM5|HTR2C|HTR2A|PRKACA
97447	8.8265e-06	6.8754e-05	6	638	16	18839	dendritic tree	CHRM3|CHRM1|CHRM5|HTR2C|HTR2A|PRKACA
99056	1.0829e-05	7.777e-05	3	52	16	18839	integral component of presynaptic membrane	CHRM1|HTR2A|SLC6A4
30054	1.1035e-05	7.777e-05	9	2034	16	18839	cell junction	CHRM3|CHRM1|CHRM5|HTR2C|HTR2A|PRKACA|SLC6A2|SLC6A3|SLC6A4
98889	1.2836e-05	8.635e-05	3	55	16	18839	intrinsic component of presynaptic membrane	CHRM1|HTR2A|SLC6A4
120025	2.1935e-05	0.00014115	9	2211	16	18839	plasma membrane bounded cell projection	CHRM3|CHRM1|CHRM5|HTR2C|HTR2A|PRKACA|SLC6A2|SLC6A3|SLC6A4
42995	3.1603e-05	0.00019489	9	2312	16	18839	cell projection	CHRM3|CHRM1|CHRM5|HTR2C|HTR2A|PRKACA|SLC6A2|SLC6A3|SLC6A4
98793	4.0571e-05	0.00024018	5	491	16	18839	presynapse	CHRM1|HTR2A|SLC6A2|SLC6A3|SLC6A4
5886	4.3313e-05	0.00024655	13	5778	16	18839	plasma membrane	CHRM3|CHRM1|CHRM5|HTR2C|ADRA1D|PRKCA|HTR2A|ADRA1B|SLC6A2|ADRA1A|SLC6A3|SLC6A4|PRKACA
45211	4.9363e-05	0.00027058	4	251	16	18839	postsynaptic membrane	CHRM3|CHRM1|CHRM5|SLC6A4
71944	5.3902e-05	0.00028491	13	5886	16	18839	cell periphery	CHRM3|CHRM1|CHRM5|HTR2C|ADRA1D|PRKCA|HTR2A|ADRA1B|SLC6A2|ADRA1A|SLC6A3|SLC6A4|PRKACA
98794	0.00010106	0.00050629	5	595	16	18839	postsynapse	CHRM3|CHRM1|CHRM5|PRKACA|SLC6A4
99699	0.00010263	0.00050629	3	110	16	18839	integral component of synaptic membrane	CHRM1|HTR2A|SLC6A4
99240	0.00012325	0.00058841	3	117	16	18839	intrinsic component of synaptic membrane	CHRM1|HTR2A|SLC6A4
32809	0.00025236	0.0011672	2	28	16	18839	neuronal cell body membrane	SLC6A2|SLC6A3
44298	0.00030998	0.0013844	2	31	16	18839	cell body membrane	SLC6A2|SLC6A3
31967	0.00032739	0.0013844	6	1217	16	18839	organelle envelope	MAOB|MAOA|PRKCA|ADRA1B|PRKACA|ADRA1A
31975	0.00032739	0.0013844	6	1217	16	18839	envelope	MAOB|MAOA|PRKCA|ADRA1B|PRKACA|ADRA1A
16020	0.00037873	0.001557	15	9679	16	18839	membrane	CHRM3|CHRM1|MAOB|MAOA|CHRM5|HTR2C|ADRA1D|PRKCA|HTR2A|ADRA1B|SLC6A2|ADRA1A|SLC6A3|SLC6A4|PRKACA
99154	0.0016979	0.0067917	1	2	16	18839	serotonergic synapse	SLC6A4

## Sheet: Module1-MF
Molecular Function
GO-ID	p-value	corr p-value	x	n	X	N	Description	Genes in test set
8227	3.1934e-17	5.5245e-15	8	52	16	18200	G protein-coupled amine receptor activity	CHRM3|CHRM1|CHRM5|HTR2C|ADRA1D|HTR2A|ADRA1B|ADRA1A
99589	7.2018e-11	4.153e-09	5	34	16	18200	serotonin receptor activity	CHRM3|CHRM1|CHRM5|HTR2C|HTR2A
4993	7.2018e-11	4.153e-09	5	34	16	18200	G protein-coupled serotonin receptor activity	CHRM3|CHRM1|CHRM5|HTR2C|HTR2A
4937	5.5744e-10	2.4109e-08	3	3	16	18200	alpha1-adrenergic receptor activity	ADRA1D|ADRA1B|ADRA1A
4936	1.1131e-08	3.8513e-07	3	6	16	18200	alpha-adrenergic receptor activity	ADRA1D|ADRA1B|ADRA1A
16907	1.9469e-08	5.6134e-07	3	7	16	18200	G protein-coupled acetylcholine receptor activity	CHRM3|CHRM1|CHRM5
30594	3.1906e-08	7.8854e-07	5	111	16	18200	neurotransmitter receptor activity	CHRM3|CHRM1|CHRM5|HTR2C|HTR2A
8504	4.6674e-08	1.0093e-06	3	9	16	18200	monoamine transmembrane transporter activity	SLC6A2|SLC6A3|SLC6A4
4935	6.6642e-08	1.1529e-06	3	10	16	18200	adrenergic receptor activity	ADRA1D|ADRA1B|ADRA1A
99528	6.6642e-08	1.1529e-06	3	10	16	18200	G protein-coupled neurotransmitter receptor activity	CHRM3|CHRM1|CHRM5
15378	9.1584e-08	1.4404e-06	3	11	16	18200	sodium:chloride symporter activity	SLC6A2|SLC6A3|SLC6A4
43176	1.2205e-07	1.6242e-06	3	12	16	18200	amine binding	HTR2C|HTR2A|SLC6A4
51378	1.2205e-07	1.6242e-06	3	12	16	18200	serotonin binding	HTR2C|HTR2A|SLC6A4
15373	2.0171e-07	2.4926e-06	3	14	16	18200	anion:sodium symporter activity	SLC6A2|SLC6A3|SLC6A4
4930	2.6807e-07	3.0917e-06	8	882	16	18200	G protein-coupled receptor activity	CHRM3|CHRM1|CHRM5|HTR2C|ADRA1D|HTR2A|ADRA1B|ADRA1A
15377	3.7622e-07	4.0679e-06	3	17	16	18200	cation:chloride symporter activity	SLC6A2|SLC6A3|SLC6A4
15464	4.5123e-07	4.5919e-06	3	18	16	18200	acetylcholine receptor activity	CHRM3|CHRM1|CHRM5
5326	5.3555e-07	5.1472e-06	3	19	16	18200	neurotransmitter transmembrane transporter activity	SLC6A2|SLC6A3|SLC6A4
71886	7.2459e-07	6.5976e-06	2	2	16	18200	1-(4-iodo-2,5-dimethoxyphenyl)propan-2-amine binding	HTR2C|HTR2A
15296	8.4976e-07	7.3504e-06	3	22	16	18200	anion:cation symporter activity	SLC6A2|SLC6A3|SLC6A4
4435	1.4316e-06	1.1794e-05	3	26	16	18200	phosphatidylinositol phospholipase C activity	CHRM3|CHRM1|CHRM5
4629	1.8019e-06	1.4169e-05	3	28	16	18200	phospholipase C activity	CHRM3|CHRM1|CHRM5
1587	2.1727e-06	1.5035e-05	2	3	16	18200	Gq/11-coupled serotonin receptor activity	HTR2C|HTR2A
35403	2.1727e-06	1.5035e-05	2	3	16	18200	histone kinase activity (H3-T6 specific)	PRKCA|PRKACA
5334	2.1727e-06	1.5035e-05	2	3	16	18200	norepinephrine:sodium symporter activity	SLC6A2|SLC6A3
5330	4.3431e-06	2.8898e-05	2	4	16	18200	dopamine:sodium symporter activity	SLC6A2|SLC6A3
4888	5.1992e-06	3.3313e-05	8	1304	16	18200	transmembrane signaling receptor activity	CHRM3|CHRM1|CHRM5|HTR2C|ADRA1D|HTR2A|ADRA1B|ADRA1A
8131	1.0847e-05	6.7016e-05	2	6	16	18200	primary amine oxidase activity	MAOB|MAOA
1901618	1.3454e-05	8.0259e-05	3	54	16	18200	organic hydroxy compound transmembrane transporter activity	SLC6A2|SLC6A3|SLC6A4
38023	1.5246e-05	8.5082e-05	8	1507	16	18200	signaling receptor activity	CHRM3|CHRM1|CHRM5|HTR2C|ADRA1D|HTR2A|ADRA1B|ADRA1A
60089	1.5246e-05	8.5082e-05	8	1507	16	18200	molecular transducer activity	CHRM3|CHRM1|CHRM5|HTR2C|ADRA1D|HTR2A|ADRA1B|ADRA1A
35184	2.0226e-05	0.00010708	2	8	16	18200	histone threonine kinase activity	PRKCA|PRKACA
98960	2.0426e-05	0.00010708	3	62	16	18200	postsynaptic neurotransmitter receptor activity	CHRM3|CHRM1|CHRM5
15370	3.2038e-05	0.00016302	3	72	16	18200	solute:sodium symporter activity	SLC6A2|SLC6A3|SLC6A4
8144	3.9191e-05	0.00019371	3	77	16	18200	drug binding	NFATC1|SLC6A3|SLC6A4
8081	6.0452e-05	0.00029051	3	89	16	18200	phosphoric diester hydrolase activity	CHRM3|CHRM1|CHRM5
15108	7.1163e-05	0.00033274	3	94	16	18200	chloride transmembrane transporter activity	SLC6A2|SLC6A3|SLC6A4
15294	8.3047e-05	0.00037337	3	99	16	18200	solute:cation symporter activity	SLC6A2|SLC6A3|SLC6A4
16641	8.6329e-05	0.00037337	2	16	16	18200	oxidoreductase activity, acting on the CH-NH2 group of donors, oxygen as acceptor	MAOB|MAOA
35173	8.6329e-05	0.00037337	2	16	16	18200	histone kinase activity	PRKCA|PRKACA
4697	9.7789e-05	0.00039804	2	17	16	18200	protein kinase C activity	PRKCA|PRKACA
4698	9.7789e-05	0.00039804	2	17	16	18200	calcium-dependent protein kinase C activity	PRKCA|PRKACA
4620	9.8936e-05	0.00039804	3	105	16	18200	phospholipase activity	CHRM3|CHRM1|CHRM5
16638	0.00013641	0.00053633	2	20	16	18200	oxidoreductase activity, acting on the CH-NH2 group of donors	MAOB|MAOA
16298	0.00019056	0.00073261	3	131	16	18200	lipase activity	CHRM3|CHRM1|CHRM5
9931	0.00019774	0.00074369	2	24	16	18200	calcium-dependent protein serine/threonine kinase activity	PRKCA|PRKACA
15103	0.00021284	0.00077428	3	136	16	18200	inorganic anion transmembrane transporter activity	SLC6A2|SLC6A3|SLC6A4
10857	0.00021483	0.00077428	2	25	16	18200	calcium-dependent protein kinase activity	PRKCA|PRKACA
15293	0.00024677	0.00087123	3	143	16	18200	symporter activity	SLC6A2|SLC6A3|SLC6A4
15081	0.00027849	0.00096357	3	149	16	18200	sodium ion transmembrane transporter activity	SLC6A2|SLC6A3|SLC6A4
19811	0.00087912	0.0029248	1	1	16	18200	cocaine binding	SLC6A4
5328	0.00087912	0.0029248	1	1	16	18200	neurotransmitter:sodium symporter activity	SLC6A2
22853	0.0010382	0.0033889	3	234	16	18200	active ion transmembrane transporter activity	SLC6A2|SLC6A3|SLC6A4
15291	0.0011853	0.0037974	3	245	16	18200	secondary active transmembrane transporter activity	SLC6A2|SLC6A3|SLC6A4
5335	0.0026352	0.0082889	1	3	16	18200	serotonin:sodium symporter activity	SLC6A4
44877	0.0029554	0.0091299	5	1203	16	18200	protein-containing complex binding	PRKCA|HTR2A|PRKACA|SLC6A3|SLC6A4
22804	0.0033314	0.0099256	3	352	16	18200	active transmembrane transporter activity	SLC6A2|SLC6A3|SLC6A4
8509	0.0033582	0.0099256	3	353	16	18200	anion transmembrane transporter activity	SLC6A2|SLC6A3|SLC6A4
15077	0.003385	0.0099256	3	354	16	18200	monovalent inorganic cation transmembrane transporter activity	SLC6A2|SLC6A3|SLC6A4
