# Supplementary material for: Network Pharmacology and Molecular Docking Combined to Analyze the Molecular and Pharmacological Mechanism of Pinellia ternata in the Treatment of Hypertension
Source: Curr Issues Mol Biol. 2021 May 1;43(1):6. doi: 10.3390/cimb43010006 (PMC8929114; doi:10.3390/cimb43010006)
Supplement: Supplementary file 1 [file cimb-43-00006-s001.zip › Supplementary Table 7.xls]

## Sheet: output_identify_20201118203944
KEGG pathway
#Term	Database	ID	Input number	Background number	P-Value	Corrected P-Value	Input	Hyperlink
Calcium signaling pathway	KEGG PATHWAY	hsa04020	10	193	8.51129e-20	8.00061e-18	ADRA1A|ADRA1B|ADRA1D|PRKCA|CHRM5|CHRM3|CHRM1|PRKACA|HTR2C|HTR2A	http://www.genome.jp/kegg-bin/show_pathway?hsa04020/hsa:5578%09red/hsa:146%09red/hsa:147%09red/hsa:1128%09red/hsa:3356%09red/hsa:3358%09red/hsa:1131%09red/hsa:1133%09red
Serotonergic synapse	KEGG PATHWAY	hsa04726	7	115	2.62648e-14	1.23444e-12	SLC6A4|PRKCA|MAOB|MAOA|PRKACA|HTR2C|HTR2A	http://www.genome.jp/kegg-bin/show_pathway?hsa04726/hsa:5578%09red/hsa:3356%09red/hsa:6532%09red/hsa:3358%09red/hsa:4129%09red/hsa:4128%09red
Neuroactive ligand-receptor interaction	KEGG PATHWAY	hsa04080	8	338	4.0626e-13	1.27295e-11	ADRA1A|ADRA1B|ADRA1D|CHRM5|CHRM3|CHRM1|HTR2A|HTR2C	http://www.genome.jp/kegg-bin/show_pathway?hsa04080/hsa:146%09red/hsa:147%09red/hsa:1128%09red/hsa:3356%09red/hsa:3358%09red/hsa:1131%09red/hsa:1133%09red
Salivary secretion	KEGG PATHWAY	hsa04970	6	90	1.43179e-12	3.36472e-11	ADRA1A|ADRA1B|ADRA1D|PRKCA|CHRM3|PRKACA	http://www.genome.jp/kegg-bin/show_pathway?hsa04970/hsa:5578%09red/hsa:146%09red/hsa:147%09red/hsa:1131%09red
Amphetamine addiction	KEGG PATHWAY	hsa05031	5	68	8.31002e-11	1.56228e-09	PRKCA|MAOB|MAOA|PRKACA|SLC6A3	http://www.genome.jp/kegg-bin/show_pathway?hsa05031/hsa:5578%09red/hsa:4129%09red/hsa:4128%09red/hsa:6531%09red
Cholinergic synapse	KEGG PATHWAY	hsa04725	5	112	9.17482e-10	1.43739e-08	PRKCA|CHRM3|CHRM5|PRKACA|CHRM1	http://www.genome.jp/kegg-bin/show_pathway?hsa04725/hsa:5578%09red/hsa:1128%09red/hsa:1131%09red/hsa:1133%09red
Dopaminergic synapse	KEGG PATHWAY	hsa04728	5	131	1.96221e-09	2.39237e-08	PRKCA|MAOB|MAOA|PRKACA|SLC6A3	http://www.genome.jp/kegg-bin/show_pathway?hsa04728/hsa:5578%09red/hsa:4129%09red/hsa:4128%09red/hsa:6531%09red
Vascular smooth muscle contraction	KEGG PATHWAY	hsa04270	5	132	2.03606e-09	2.39237e-08	ADRA1A|PRKCA|ADRA1B|PRKACA|ADRA1D	http://www.genome.jp/kegg-bin/show_pathway?hsa04270/hsa:5578%09red/hsa:146%09red/hsa:147%09red
Adrenergic signaling in cardiomyocytes	KEGG PATHWAY	hsa04261	5	149	3.66975e-09	3.83285e-08	ADRA1A|PRKCA|ADRA1B|PRKACA|ADRA1D	http://www.genome.jp/kegg-bin/show_pathway?hsa04261/hsa:5578%09red/hsa:146%09red/hsa:147%09red
Gap junction	KEGG PATHWAY	hsa04540	4	88	5.02859e-08	4.72688e-07	PRKCA|PRKACA|HTR2A|HTR2C	http://www.genome.jp/kegg-bin/show_pathway?hsa04540/hsa:5578%09red/hsa:3358%09red/hsa:3356%09red
Inflammatory mediator regulation of TRP channels	KEGG PATHWAY	hsa04750	4	100	8.25089e-08	7.05076e-07	PRKCA|PRKACA|HTR2A|HTR2C	http://www.genome.jp/kegg-bin/show_pathway?hsa04750/hsa:5578%09red/hsa:3358%09red/hsa:3356%09red
cGMP-PKG signaling pathway	KEGG PATHWAY	hsa04022	4	167	6.07048e-07	4.75521e-06	ADRA1A|NFATC1|ADRA1B|ADRA1D	http://www.genome.jp/kegg-bin/show_pathway?hsa04022/hsa:146%09red/hsa:147%09red/hsa:4772%09red
Cocaine addiction	KEGG PATHWAY	hsa05030	3	49	1.21235e-06	8.76621e-06	SLC6A3|MAOB|MAOA	http://www.genome.jp/kegg-bin/show_pathway?hsa05030/hsa:4129%09red/hsa:4128%09red/hsa:6531%09red
Gastric acid secretion	KEGG PATHWAY	hsa04971	3	75	4.14646e-06	2.78405e-05	PRKCA|CHRM3|PRKACA	http://www.genome.jp/kegg-bin/show_pathway?hsa04971/hsa:5578%09red/hsa:1131%09red
Synaptic vesicle cycle	KEGG PATHWAY	hsa04721	3	78	4.64683e-06	2.91201e-05	SLC6A3|SLC6A2|SLC6A4	http://www.genome.jp/kegg-bin/show_pathway?hsa04721/hsa:6530%09red/hsa:6531%09red/hsa:6532%09red
Insulin secretion	KEGG PATHWAY	hsa04911	3	86	6.17282e-06	3.62653e-05	PRKCA|CHRM3|PRKACA	http://www.genome.jp/kegg-bin/show_pathway?hsa04911/hsa:5578%09red/hsa:1131%09red
Pancreatic secretion	KEGG PATHWAY	hsa04972	3	98	9.03136e-06	4.99381e-05	PRKCA|CHRM3|PRKACA	http://www.genome.jp/kegg-bin/show_pathway?hsa04972/hsa:5578%09red/hsa:1131%09red
AGE-RAGE signaling pathway in diabetic complications	KEGG PATHWAY	hsa04933	3	100	9.57943e-06	5.00259e-05	PRKCA|NFATC1|PRKACA	http://www.genome.jp/kegg-bin/show_pathway?hsa04933/hsa:5578%09red/hsa:4772%09red
Natural killer cell mediated cytotoxicity	KEGG PATHWAY	hsa04650	3	131	2.10749e-05	0.000104265	PRKCA|NFATC1|PRKACA	http://www.genome.jp/kegg-bin/show_pathway?hsa04650/hsa:5578%09red/hsa:4772%09red
Phenylalanine metabolism	KEGG PATHWAY	hsa00360	2	17	2.65193e-05	0.000124641	MAOB|MAOA	http://www.genome.jp/kegg-bin/show_pathway?hsa00360/hsa:4129%09red/hsa:4128%09red
Oxytocin signaling pathway	KEGG PATHWAY	hsa04921	3	153	3.3177e-05	0.000148507	PRKCA|NFATC1|PRKACA	http://www.genome.jp/kegg-bin/show_pathway?hsa04921/hsa:5578%09red/hsa:4772%09red
Wnt signaling pathway	KEGG PATHWAY	hsa04310	3	160	3.78123e-05	0.000161562	PRKCA|NFATC1|PRKACA	http://www.genome.jp/kegg-bin/show_pathway?hsa04310/hsa:5578%09red/hsa:4772%09red
Hepatitis B	KEGG PATHWAY	hsa05161	3	163	3.99224e-05	0.000163161	PRKCA|NFATC1|PRKACA	http://www.genome.jp/kegg-bin/show_pathway?hsa05161/hsa:5578%09red/hsa:4772%09red
Histidine metabolism	KEGG PATHWAY	hsa00340	2	23	4.64588e-05	0.000181964	MAOB|MAOA	http://www.genome.jp/kegg-bin/show_pathway?hsa00340/hsa:4129%09red/hsa:4128%09red
Alcoholism	KEGG PATHWAY	hsa05034	3	180	5.33516e-05	0.000200602	SLC6A3|MAOB|MAOA	http://www.genome.jp/kegg-bin/show_pathway?hsa05034/hsa:4129%09red/hsa:4128%09red/hsa:6531%09red
Human immunodeficiency virus 1 infection	KEGG PATHWAY	hsa05170	3	212	8.60446e-05	0.000307887	PRKCA|NFATC1|PRKACA	http://www.genome.jp/kegg-bin/show_pathway?hsa05170/hsa:5578%09red/hsa:4772%09red
Regulation of actin cytoskeleton	KEGG PATHWAY	hsa04810	3	214	8.84357e-05	0.000307887	CHRM5|CHRM3|CHRM1	http://www.genome.jp/kegg-bin/show_pathway?hsa04810/hsa:1128%09red/hsa:1131%09red/hsa:1133%09red
Human cytomegalovirus infection	KEGG PATHWAY	hsa05163	3	225	0.000102366	0.000343659	PRKCA|NFATC1|PRKACA	http://www.genome.jp/kegg-bin/show_pathway?hsa05163/hsa:5578%09red/hsa:4772%09red
Tyrosine metabolism	KEGG PATHWAY	hsa00350	2	36	0.000108533	0.000346806	MAOB|MAOA	http://www.genome.jp/kegg-bin/show_pathway?hsa00350/hsa:4129%09red/hsa:4128%09red
African trypanosomiasis	KEGG PATHWAY	hsa05143	2	37	0.000114372	0.000346806	PRKCA|PRKACA	http://www.genome.jp/kegg-bin/show_pathway?hsa05143/hsa:5578%09red
Aldosterone-regulated sodium reabsorption	KEGG PATHWAY	hsa04960	2	37	0.000114372	0.000346806	PRKCA|PRKACA	http://www.genome.jp/kegg-bin/show_pathway?hsa04960/hsa:5578%09red
Glycine, serine and threonine metabolism	KEGG PATHWAY	hsa00260	2	40	0.000132799	0.000390097	MAOB|MAOA	http://www.genome.jp/kegg-bin/show_pathway?hsa00260/hsa:4129%09red/hsa:4128%09red
Tryptophan metabolism	KEGG PATHWAY	hsa00380	2	42	0.00014584	0.000415423	MAOB|MAOA	http://www.genome.jp/kegg-bin/show_pathway?hsa00380/hsa:4129%09red/hsa:4128%09red
Vibrio cholerae infection	KEGG PATHWAY	hsa05110	2	50	0.000204034	0.000532757	PRKCA|PRKACA	http://www.genome.jp/kegg-bin/show_pathway?hsa05110/hsa:5578%09red
Endocrine and other factor-regulated calcium reabsorption	KEGG PATHWAY	hsa04961	2	50	0.000204034	0.000532757	PRKCA|PRKACA	http://www.genome.jp/kegg-bin/show_pathway?hsa04961/hsa:5578%09red
Arginine and proline metabolism	KEGG PATHWAY	hsa00330	2	50	0.000204034	0.000532757	MAOB|MAOA	http://www.genome.jp/kegg-bin/show_pathway?hsa00330/hsa:4129%09red/hsa:4128%09red
MAPK signaling pathway	KEGG PATHWAY	hsa04010	3	295	0.000225317	0.000572427	PRKCA|NFATC1|PRKACA	http://www.genome.jp/kegg-bin/show_pathway?hsa04010/hsa:5578%09red/hsa:4772%09red
Pathogenic Escherichia coli infection	KEGG PATHWAY	hsa05130	2	55	0.000245288	0.000606766	PRKCA|PRKACA	http://www.genome.jp/kegg-bin/show_pathway?hsa05130/hsa:5578%09red
VEGF signaling pathway	KEGG PATHWAY	hsa04370	2	59	0.000280984	0.000677244	PRKCA|PRKACA	http://www.genome.jp/kegg-bin/show_pathway?hsa04370/hsa:5578%09red
Long-term depression	KEGG PATHWAY	hsa04730	2	60	0.000290282	0.000682162	PRKCA|PRKACA	http://www.genome.jp/kegg-bin/show_pathway?hsa04730/hsa:5578%09red
Non-small cell lung cancer	KEGG PATHWAY	hsa05223	2	66	0.000349191	0.000800583	PRKCA|PRKACA	http://www.genome.jp/kegg-bin/show_pathway?hsa05223/hsa:5578%09red
Long-term potentiation	KEGG PATHWAY	hsa04720	2	67	0.000359529	0.000804659	PRKCA|PRKACA	http://www.genome.jp/kegg-bin/show_pathway?hsa04720/hsa:5578%09red
Fc epsilon RI signaling pathway	KEGG PATHWAY	hsa04664	2	68	0.000370015	0.00080887	PRKCA|PRKACA	http://www.genome.jp/kegg-bin/show_pathway?hsa04664/hsa:5578%09red
PI3K-Akt signaling pathway	KEGG PATHWAY	hsa04151	3	354	0.000382388	0.00081692	PRKCA|PRKACA|CHRM1	http://www.genome.jp/kegg-bin/show_pathway?hsa04151/hsa:5578%09red/hsa:1128%09red
Drug metabolism - cytochrome P450	KEGG PATHWAY	hsa00982	2	72	0.000413442	0.000863634	MAOB|MAOA	http://www.genome.jp/kegg-bin/show_pathway?hsa00982/hsa:4129%09red/hsa:4128%09red
Thyroid hormone synthesis	KEGG PATHWAY	hsa04918	2	74	0.000436042	0.000891042	PRKCA|PRKACA	http://www.genome.jp/kegg-bin/show_pathway?hsa04918/hsa:5578%09red
Glioma	KEGG PATHWAY	hsa05214	2	75	0.000447563	0.000895126	PRKCA|PRKACA	http://www.genome.jp/kegg-bin/show_pathway?hsa05214/hsa:5578%09red
EGFR tyrosine kinase inhibitor resistance	KEGG PATHWAY	hsa01521	2	79	0.000495122	0.000969614	PRKCA|PRKACA	http://www.genome.jp/kegg-bin/show_pathway?hsa01521/hsa:5578%09red
ErbB signaling pathway	KEGG PATHWAY	hsa04012	2	85	0.000570868	0.00109514	PRKCA|PRKACA	http://www.genome.jp/kegg-bin/show_pathway?hsa04012/hsa:5578%09red
GABAergic synapse	KEGG PATHWAY	hsa04727	2	89	0.000624295	0.00117367	PRKCA|PRKACA	http://www.genome.jp/kegg-bin/show_pathway?hsa04727/hsa:5578%09red
Morphine addiction	KEGG PATHWAY	hsa05032	2	91	0.000651884	0.00120151	PRKCA|PRKACA	http://www.genome.jp/kegg-bin/show_pathway?hsa05032/hsa:5578%09red
GnRH signaling pathway	KEGG PATHWAY	hsa04912	2	93	0.000680056	0.00122933	PRKCA|PRKACA	http://www.genome.jp/kegg-bin/show_pathway?hsa04912/hsa:5578%09red
Fc gamma R-mediated phagocytosis	KEGG PATHWAY	hsa04666	2	94	0.00069436	0.00123151	PRKCA|PRKACA	http://www.genome.jp/kegg-bin/show_pathway?hsa04666/hsa:5578%09red
Amoebiasis	KEGG PATHWAY	hsa05146	2	95	0.00070881	0.00123385	PRKCA|PRKACA	http://www.genome.jp/kegg-bin/show_pathway?hsa05146/hsa:5578%09red
Circadian entrainment	KEGG PATHWAY	hsa04713	2	97	0.000738145	0.00124479	PRKCA|PRKACA	http://www.genome.jp/kegg-bin/show_pathway?hsa04713/hsa:5578%09red
Aldosterone synthesis and secretion	KEGG PATHWAY	hsa04925	2	98	0.00075303	0.00124479	PRKCA|PRKACA	http://www.genome.jp/kegg-bin/show_pathway?hsa04925/hsa:5578%09red
Choline metabolism in cancer	KEGG PATHWAY	hsa05231	2	99	0.000768061	0.00124479	PRKCA|PRKACA	http://www.genome.jp/kegg-bin/show_pathway?hsa05231/hsa:5578%09red
Phosphatidylinositol signaling system	KEGG PATHWAY	hsa04070	2	99	0.000768061	0.00124479	PRKCA|PRKACA	http://www.genome.jp/kegg-bin/show_pathway?hsa04070/hsa:5578%09red
Melanogenesis	KEGG PATHWAY	hsa04916	2	101	0.000798556	0.00127228	PRKCA|PRKACA	http://www.genome.jp/kegg-bin/show_pathway?hsa04916/hsa:5578%09red
Parathyroid hormone synthesis, secretion and action	KEGG PATHWAY	hsa04928	2	106	0.000877323	0.00137447	PRKCA|PRKACA	http://www.genome.jp/kegg-bin/show_pathway?hsa04928/hsa:5578%09red
HIF-1 signaling pathway	KEGG PATHWAY	hsa04066	2	109	0.000926314	0.00142743	PRKCA|PRKACA	http://www.genome.jp/kegg-bin/show_pathway?hsa04066/hsa:5578%09red
Leukocyte transendothelial migration	KEGG PATHWAY	hsa04670	2	112	0.000976599	0.00148065	PRKCA|PRKACA	http://www.genome.jp/kegg-bin/show_pathway?hsa04670/hsa:5578%09red
Glutamatergic synapse	KEGG PATHWAY	hsa04724	2	114	0.00101084	0.00150824	PRKCA|PRKACA	http://www.genome.jp/kegg-bin/show_pathway?hsa04724/hsa:5578%09red
Sphingolipid signaling pathway	KEGG PATHWAY	hsa04071	2	119	0.00109895	0.00158925	PRKCA|PRKACA	http://www.genome.jp/kegg-bin/show_pathway?hsa04071/hsa:5578%09red
Thyroid hormone signaling pathway	KEGG PATHWAY	hsa04919	2	119	0.00109895	0.00158925	PRKCA|PRKACA	http://www.genome.jp/kegg-bin/show_pathway?hsa04919/hsa:5578%09red
Relaxin signaling pathway	KEGG PATHWAY	hsa04926	2	130	0.00130534	0.00185911	PRKCA|PRKACA	http://www.genome.jp/kegg-bin/show_pathway?hsa04926/hsa:5578%09red
Phospholipase D signaling pathway	KEGG PATHWAY	hsa04072	2	148	0.00167996	0.00232229	PRKCA|PRKACA	http://www.genome.jp/kegg-bin/show_pathway?hsa04072/hsa:5578%09red
Retrograde endocannabinoid signaling	KEGG PATHWAY	hsa04723	2	148	0.00167996	0.00232229	PRKCA|PRKACA	http://www.genome.jp/kegg-bin/show_pathway?hsa04723/hsa:5578%09red
mTOR signaling pathway	KEGG PATHWAY	hsa04150	2	153	0.00179208	0.00244139	PRKCA|PRKACA	http://www.genome.jp/kegg-bin/show_pathway?hsa04150/hsa:5578%09red
Influenza A	KEGG PATHWAY	hsa05164	2	167	0.00212451	0.00284554	PRKCA|PRKACA	http://www.genome.jp/kegg-bin/show_pathway?hsa05164/hsa:5578%09red
Hepatocellular carcinoma	KEGG PATHWAY	hsa05225	2	168	0.00214929	0.00284554	PRKCA|PRKACA	http://www.genome.jp/kegg-bin/show_pathway?hsa05225/hsa:5578%09red
Axon guidance	KEGG PATHWAY	hsa04360	2	181	0.00248394	0.00324293	PRKCA|PRKACA	http://www.genome.jp/kegg-bin/show_pathway?hsa04360/hsa:5578%09red
Focal adhesion	KEGG PATHWAY	hsa04510	2	199	0.00298532	0.00384411	PRKCA|PRKACA	http://www.genome.jp/kegg-bin/show_pathway?hsa04510/hsa:5578%09red
Proteoglycans in cancer	KEGG PATHWAY	hsa05205	2	203	0.00310268	0.00394124	PRKCA|PRKACA	http://www.genome.jp/kegg-bin/show_pathway?hsa05205/hsa:5578%09red
Rap1 signaling pathway	KEGG PATHWAY	hsa04015	2	210	0.00331321	0.00415256	PRKCA|PRKACA	http://www.genome.jp/kegg-bin/show_pathway?hsa04015/hsa:5578%09red
cAMP signaling pathway	KEGG PATHWAY	hsa04024	2	214	0.00343646	0.00425036	NFATC1|CHRM1	http://www.genome.jp/kegg-bin/show_pathway?hsa04024/hsa:1128%09red/hsa:4772%09red
Ras signaling pathway	KEGG PATHWAY	hsa04014	2	232	0.00401732	0.00490426	PRKCA|PRKACA	http://www.genome.jp/kegg-bin/show_pathway?hsa04014/hsa:5578%09red
MicroRNAs in cancer	KEGG PATHWAY	hsa05206	2	299	0.00654869	0.00789201	PRKCA|PRKACA	http://www.genome.jp/kegg-bin/show_pathway?hsa05206/hsa:5578%09red
Pathways in cancer	KEGG PATHWAY	hsa05200	2	530	0.0193968	0.0230798	PRKCA|PRKACA	http://www.genome.jp/kegg-bin/show_pathway?hsa05200/hsa:5578%09red
Inflammatory bowel disease (IBD)	KEGG PATHWAY	hsa05321	1	65	0.0265661	0.0312152	NFATC1	http://www.genome.jp/kegg-bin/show_pathway?hsa05321/hsa:4772%09red
B cell receptor signaling pathway	KEGG PATHWAY	hsa04662	1	82	0.033301	0.0386268	NFATC1	http://www.genome.jp/kegg-bin/show_pathway?hsa04662/hsa:4772%09red
Taste transduction	KEGG PATHWAY	hsa04742	1	83	0.0336958	0.0386268	CHRM3	http://www.genome.jp/kegg-bin/show_pathway?hsa04742/hsa:1131%09red
PD-L1 expression and PD-1 checkpoint pathway in cancer	KEGG PATHWAY	hsa05235	1	89	0.0360614	0.0408406	NFATC1	http://www.genome.jp/kegg-bin/show_pathway?hsa05235/hsa:4772%09red
Th1 and Th2 cell differentiation	KEGG PATHWAY	hsa04658	1	92	0.0372422	0.0416758	NFATC1	http://www.genome.jp/kegg-bin/show_pathway?hsa04658/hsa:4772%09red
T cell receptor signaling pathway	KEGG PATHWAY	hsa04660	1	103	0.0415601	0.0458543	NFATC1	http://www.genome.jp/kegg-bin/show_pathway?hsa04660/hsa:4772%09red
C-type lectin receptor signaling pathway	KEGG PATHWAY	hsa04625	1	104	0.0419518	0.0458543	NFATC1	http://www.genome.jp/kegg-bin/show_pathway?hsa04625/hsa:4772%09red
Th17 cell differentiation	KEGG PATHWAY	hsa04659	1	107	0.0431258	0.0465957	NFATC1	http://www.genome.jp/kegg-bin/show_pathway?hsa04659/hsa:4772%09red
Yersinia infection	KEGG PATHWAY	hsa05135	1	121	0.0485867	0.0518995	NFATC1	http://www.genome.jp/kegg-bin/show_pathway?hsa05135/hsa:4772%09red
Osteoclast differentiation	KEGG PATHWAY	hsa04380	1	128	0.0513062	0.0541886	NFATC1	http://www.genome.jp/kegg-bin/show_pathway?hsa04380/hsa:4772%09red
Parkinson disease	KEGG PATHWAY	hsa05012	1	142	0.0567234	0.0592444	SLC6A3	http://www.genome.jp/kegg-bin/show_pathway?hsa05012/hsa:6531%09red
Cellular senescence	KEGG PATHWAY	hsa04218	1	160	0.0636457	0.0657439	NFATC1	http://www.genome.jp/kegg-bin/show_pathway?hsa04218/hsa:4772%09red
Kaposi sarcoma-associated herpesvirus infection	KEGG PATHWAY	hsa05167	1	186	0.0735606	0.0751597	NFATC1	http://www.genome.jp/kegg-bin/show_pathway?hsa05167/hsa:4772%09red
Human T-cell leukemia virus 1 infection	KEGG PATHWAY	hsa05166	1	219	0.0860031	0.0869278	NFATC1	http://www.genome.jp/kegg-bin/show_pathway?hsa05166/hsa:4772%09red
Metabolic pathways	KEGG PATHWAY	hsa01100	2	1433	0.114292	0.114292	MAOB|MAOA	http://www.genome.jp/kegg-bin/show_pathway?hsa01100/hsa:4129%09red/hsa:4128%09red
