# Supplementary material for: Network Pharmacology and Molecular Docking Combined to Analyze the Molecular and Pharmacological Mechanism of Pinellia ternata in the Treatment of Hypertension
Source: Curr Issues Mol Biol. 2021 May 1;43(1):6. doi: 10.3390/cimb43010006 (PMC8929114; doi:10.3390/cimb43010006)
Supplement: Supplementary file 1 [file cimb-43-00006-s001.zip › Supplementary Table 8.xls]

## Sheet: Module3-BP
Biological Process
GO-ID	p-value	corr p-value	x	n	X	N	Description	Genes in test set
7188	2.7066e-13	1.4237e-10	7	217	8	17956	adenylate cyclase-modulating G protein-coupled receptor signaling pathway	OPRD1|CHRM2|CHRM4|ADRB1|ADRB2|OPRM1|ADRA2C
7187	6.9672e-13	1.8324e-10	7	248	8	17956	G protein-coupled receptor signaling pathway, coupled to cyclic nucleotide second messenger	OPRD1|CHRM2|CHRM4|ADRB1|ADRB2|OPRM1|ADRA2C
7197	3.2473e-09	5.6935e-07	3	8	8	17956	adenylate cyclase-inhibiting G protein-coupled acetylcholine receptor signaling pathway	CHRM2|CHRM4|OPRM1
7193	2.2758e-08	2.1819e-06	4	78	8	17956	adenylate cyclase-inhibiting G protein-coupled receptor signaling pathway	OPRD1|CHRM2|CHRM4|OPRM1
1903351	2.5224e-08	2.1819e-06	4	80	8	17956	cellular response to dopamine	CHRM2|CHRM4|HTR3A|OPRM1
1903350	2.5224e-08	2.1819e-06	4	80	8	17956	response to dopamine	CHRM2|CHRM4|HTR3A|OPRM1
44057	2.9037e-08	2.1819e-06	6	579	8	17956	regulation of system process	OPRD1|CHRM2|ADRB1|ADRB2|OPRM1|ADRA2C
71868	5.2829e-08	2.6227e-06	4	96	8	17956	cellular response to monoamine stimulus	CHRM2|CHRM4|HTR3A|OPRM1
71870	5.2829e-08	2.6227e-06	4	96	8	17956	cellular response to catecholamine stimulus	CHRM2|CHRM4|HTR3A|OPRM1
7213	5.606e-08	2.6227e-06	3	19	8	17956	G protein-coupled acetylcholine receptor signaling pathway	CHRM2|CHRM4|OPRM1
71867	5.9833e-08	2.6227e-06	4	99	8	17956	response to monoamine	CHRM2|CHRM4|HTR3A|OPRM1
71869	5.9833e-08	2.6227e-06	4	99	8	17956	response to catecholamine	CHRM2|CHRM4|HTR3A|OPRM1
71880	7.6913e-08	3.112e-06	3	21	8	17956	adenylate cyclase-activating adrenergic receptor signaling pathway	ADRB1|ADRB2|ADRA2C
7186	8.3378e-08	3.1326e-06	7	1315	8	17956	G protein-coupled receptor signaling pathway	OPRD1|CHRM2|CHRM4|ADRB1|ADRB2|OPRM1|ADRA2C
71875	1.0237e-07	3.5899e-06	3	23	8	17956	adrenergic receptor signaling pathway	ADRB1|ADRB2|ADRA2C
7189	2.0898e-07	6.5272e-06	4	135	8	17956	adenylate cyclase-activating G protein-coupled receptor signaling pathway	ADRB1|ADRB2|OPRM1|ADRA2C
95500	2.1096e-07	6.5272e-06	3	29	8	17956	acetylcholine receptor signaling pathway	CHRM2|CHRM4|OPRM1
1905145	2.594e-07	6.9269e-06	3	31	8	17956	cellular response to acetylcholine	CHRM2|CHRM4|OPRM1
1905144	2.594e-07	6.9269e-06	3	31	8	17956	response to acetylcholine	CHRM2|CHRM4|OPRM1
31644	2.6338e-07	6.9269e-06	4	143	8	17956	regulation of nervous system process	OPRD1|ADRB2|OPRM1|ADRA2C
98926	3.7739e-07	9.3977e-06	3	35	8	17956	postsynaptic signal transduction	CHRM2|CHRM4|OPRM1
19933	3.9306e-07	9.3977e-06	4	158	8	17956	cAMP-mediated signaling	ADRB1|ADRB2|OPRM1|ADRA2C
42391	4.3008e-07	9.8358e-06	5	435	8	17956	regulation of membrane potential	OPRD1|ADRB1|HTR3A|ADRB2|OPRM1
7210	5.2652e-07	1.1078e-05	3	39	8	17956	serotonin receptor signaling pathway	CHRM2|CHRM4|HTR3A
51930	5.2652e-07	1.1078e-05	3	39	8	17956	regulation of sensory perception of pain	OPRD1|OPRM1|ADRA2C
51931	5.6909e-07	1.1513e-05	3	40	8	17956	regulation of sensory perception	OPRD1|OPRM1|ADRA2C
19935	6.4799e-07	1.2624e-05	4	179	8	17956	cyclic-nucleotide-mediated signaling	ADRB1|ADRB2|OPRM1|ADRA2C
2025	1.0417e-06	1.9569e-05	2	4	8	17956	norepinephrine-epinephrine-mediated vasodilation involved in regulation of systemic arterial blood pressure	ADRB1|ADRB2
31649	1.7358e-06	3.1484e-05	2	5	8	17956	heat generation	ADRB1|ADRB2
6940	1.9629e-06	3.4081e-05	3	60	8	17956	regulation of smooth muscle contraction	CHRM2|ADRB2|ADRA2C
71417	2.0086e-06	3.4081e-05	5	594	8	17956	cellular response to organonitrogen compound	CHRM2|CHRM4|HTR3A|ADRB2|OPRM1
1901699	3.1547e-06	5.1856e-05	5	651	8	17956	cellular response to nitrogen compound	CHRM2|CHRM4|HTR3A|ADRB2|OPRM1
38003	7.8025e-06	0.00012071	2	10	8	17956	opioid receptor signaling pathway	OPRD1|OPRM1
1993	7.8025e-06	0.00012071	2	10	8	17956	regulation of systemic arterial blood pressure by norepinephrine-epinephrine	ADRB1|ADRB2
7200	8.6551e-06	0.00013007	3	98	8	17956	phospholipase C-activating G protein-coupled receptor signaling pathway	OPRD1|CHRM2|OPRM1
19932	9.0251e-06	0.00013187	4	347	8	17956	second-messenger-mediated signaling	ADRB1|ADRB2|OPRM1|ADRA2C
40015	9.5342e-06	0.00013197	2	11	8	17956	negative regulation of multicellular organism growth	ADRB1|ADRB2
2024	9.5342e-06	0.00013197	2	11	8	17956	diet induced thermogenesis	ADRB1|ADRB2
7268	1.6777e-05	0.00022061	4	406	8	17956	chemical synaptic transmission	CHRM2|CHRM4|HTR3A|OPRM1
98916	1.6777e-05	0.00022061	4	406	8	17956	anterograde trans-synaptic signaling	CHRM2|CHRM4|HTR3A|OPRM1
45986	1.8185e-05	0.00023331	2	15	8	17956	negative regulation of smooth muscle contraction	ADRB2|ADRA2C
99537	1.9536e-05	0.00024466	4	422	8	17956	trans-synaptic signaling	CHRM2|CHRM4|HTR3A|OPRM1
10243	2.3728e-05	0.00029026	5	983	8	17956	response to organonitrogen compound	CHRM2|CHRM4|HTR3A|ADRB2|OPRM1
99536	2.4718e-05	0.00029549	4	448	8	17956	synaptic signaling	CHRM2|CHRM4|HTR3A|OPRM1
1990845	2.6481e-05	0.00030098	2	18	8	17956	adaptive thermogenesis	ADRB1|ADRB2
97746	2.69e-05	0.00030098	3	143	8	17956	regulation of blood vessel diameter	ADRB1|ADRB2|ADRA2C
35296	2.69e-05	0.00030098	3	143	8	17956	regulation of tube diameter	ADRB1|ADRB2|ADRA2C
35150	2.7466e-05	0.00030098	3	144	8	17956	regulation of tube size	ADRB1|ADRB2|ADRA2C
3085	3.287e-05	0.00035037	2	20	8	17956	negative regulation of systemic arterial blood pressure	ADRB1|ADRB2
1901701	3.3305e-05	0.00035037	5	1054	8	17956	cellular response to oxygen-containing compound	CHRM2|CHRM4|HTR3A|ADRB2|OPRM1
71407	3.5428e-05	0.00035918	4	491	8	17956	cellular response to organic cyclic compound	CHRM2|CHRM4|HTR3A|OPRM1
1901698	3.5508e-05	0.00035918	5	1068	8	17956	response to nitrogen compound	CHRM2|CHRM4|HTR3A|ADRB2|OPRM1
6937	3.6932e-05	0.00036653	3	159	8	17956	regulation of muscle contraction	CHRM2|ADRB2|ADRA2C
7165	3.9861e-05	0.00038828	8	5064	8	17956	signal transduction	OPRD1|CHRM2|CHRM4|ADRB1|HTR3A|ADRB2|OPRM1|ADRA2C
7267	4.2626e-05	0.00040766	5	1109	8	17956	cell-cell signaling	CHRM2|CHRM4|HTR3A|OPRM1|ADRA2C
45932	4.374e-05	0.00041085	2	23	8	17956	negative regulation of muscle contraction	ADRB2|ADRA2C
71495	4.6682e-05	0.00042344	5	1130	8	17956	cellular response to endogenous stimulus	CHRM2|CHRM4|HTR3A|ADRB2|OPRM1
10469	4.6691e-05	0.00042344	3	172	8	17956	regulation of signaling receptor activity	ADRB2|OPRM1|ADRA2C
2021	5.615e-05	0.0005006	2	26	8	17956	response to dietary excess	ADRB1|ADRB2
50873	6.0629e-05	0.00053151	2	27	8	17956	brown fat cell differentiation	ADRB1|ADRB2
23052	6.8667e-05	0.00059212	8	5420	8	17956	signaling	OPRD1|CHRM2|CHRM4|ADRB1|HTR3A|ADRB2|OPRM1|ADRA2C
1659	7.5088e-05	0.00062693	2	30	8	17956	temperature homeostasis	ADRB1|ADRB2
42755	7.5088e-05	0.00062693	2	30	8	17956	eating behavior	OPRD1|OPRM1
7154	7.7777e-05	0.00063923	8	5505	8	17956	cell communication	OPRD1|CHRM2|CHRM4|ADRB1|HTR3A|ADRB2|OPRM1|ADRA2C
98664	9.6752e-05	0.00078294	2	34	8	17956	G protein-coupled serotonin receptor signaling pathway	CHRM2|CHRM4
71310	0.000101	0.00079122	6	2314	8	17956	cellular response to organic substance	OPRD1|CHRM2|CHRM4|HTR3A|ADRB2|OPRM1
42311	0.00010259	0.00079122	2	35	8	17956	vasodilation	ADRB1|ADRB2
2000273	0.00010259	0.00079122	2	35	8	17956	positive regulation of signaling receptor activity	ADRB2|ADRA2C
90257	0.00010379	0.00079122	3	225	8	17956	regulation of muscle system process	CHRM2|ADRB2|ADRA2C
9719	0.00012939	0.00097227	5	1396	8	17956	response to endogenous stimulus	CHRM2|CHRM4|HTR3A|ADRB2|OPRM1
7190	0.00013434	0.00099526	2	40	8	17956	activation of adenylate cyclase activity	ADRB1|ADRB2
43269	0.00014616	0.0010678	4	706	8	17956	regulation of ion transport	OPRD1|HTR3A|ADRB2|OPRM1
32412	0.00015567	0.0011217	3	258	8	17956	regulation of ion transmembrane transporter activity	HTR3A|ADRB2|OPRM1
3018	0.00016476	0.0011711	3	263	8	17956	vascular process in circulatory system	ADRB1|ADRB2|ADRA2C
22898	0.00017612	0.0012321	3	269	8	17956	regulation of transmembrane transporter activity	HTR3A|ADRB2|OPRM1
42220	0.00017802	0.0012321	2	46	8	17956	response to cocaine	HTR3A|OPRM1
45744	0.00018589	0.0012536	2	47	8	17956	negative regulation of G protein-coupled receptor signaling pathway	ADRB2|OPRM1
45776	0.00018589	0.0012536	2	47	8	17956	negative regulation of blood pressure	ADRB1|ADRB2
9409	0.00019393	0.0012751	2	48	8	17956	response to cold	ADRB1|ADRB2
3044	0.00019393	0.0012751	2	48	8	17956	regulation of systemic arterial blood pressure mediated by a chemical signal	ADRB1|ADRB2
32409	0.00020034	0.001301	3	281	8	17956	regulation of transporter activity	HTR3A|ADRB2|OPRM1
1903522	0.00021987	0.0013916	3	290	8	17956	regulation of blood circulation	CHRM2|ADRB1|ADRA2C
51239	0.00022085	0.0013916	6	2652	8	17956	regulation of multicellular organismal process	OPRD1|CHRM2|ADRB1|ADRB2|OPRM1|ADRA2C
1901700	0.00022223	0.0013916	5	1563	8	17956	response to oxygen-containing compound	CHRM2|CHRM4|HTR3A|ADRB2|OPRM1
97755	0.00031371	0.0019413	2	61	8	17956	positive regulation of blood vessel diameter	ADRB1|ADRB2
14070	0.00032756	0.0020034	4	870	8	17956	response to organic cyclic compound	CHRM2|CHRM4|HTR3A|OPRM1
70887	0.00035208	0.0021287	6	2878	8	17956	cellular response to chemical stimulus	OPRD1|CHRM2|CHRM4|HTR3A|ADRB2|OPRM1
51716	0.00037613	0.0022482	8	6703	8	17956	cellular response to stimulus	OPRD1|CHRM2|CHRM4|ADRB1|HTR3A|ADRB2|OPRM1|ADRA2C
40014	0.0003899	0.0023044	2	68	8	17956	regulation of multicellular organism growth	ADRB1|ADRB2
51049	0.00039937	0.0023341	5	1768	8	17956	regulation of transport	OPRD1|HTR3A|ADRB2|OPRM1|ADRA2C
10033	0.00041145	0.0023782	6	2958	8	17956	response to organic substance	OPRD1|CHRM2|CHRM4|HTR3A|ADRB2|OPRM1
44093	0.00043938	0.0024931	5	1804	8	17956	positive regulation of molecular function	OPRD1|ADRB1|HTR3A|ADRB2|ADRA2C
70473	0.00044553	0.0024931	1	1	8	17956	negative regulation of uterine smooth muscle contraction	ADRA2C
61358	0.00044553	0.0024931	1	1	8	17956	negative regulation of Wnt protein secretion	OPRM1
65009	0.00046632	0.0025819	6	3024	8	17956	regulation of molecular function	OPRD1|ADRB1|HTR3A|ADRB2|OPRM1|ADRA2C
99601	0.00052605	0.0028823	2	79	8	17956	regulation of neurotransmitter receptor activity	ADRB2|OPRM1
8015	0.00056122	0.0030433	3	399	8	17956	blood circulation	ADRB1|ADRB2|ADRA2C
1934	0.00056942	0.0030563	4	1005	8	17956	positive regulation of protein phosphorylation	OPRD1|ADRB2|OPRM1|ADRA2C
7631	0.00066713	0.0035446	2	89	8	17956	feeding behavior	OPRD1|OPRM1
42327	0.00074393	0.0039131	4	1078	8	17956	positive regulation of phosphorylation	OPRD1|ADRB2|OPRM1|ADRA2C
3008	0.0007916	0.0040435	5	2044	8	17956	system process	ADRB1|HTR3A|ADRB2|OPRM1|ADRA2C
3073	0.00079178	0.0040435	2	97	8	17956	regulation of systemic arterial blood pressure	ADRB1|ADRB2
120162	0.00079178	0.0040435	2	97	8	17956	positive regulation of cold-induced thermogenesis	ADRB1|ADRB2
60078	0.00084122	0.0042217	2	100	8	17956	regulation of postsynaptic membrane potential	ADRB1|OPRM1
48640	0.00085802	0.0042217	2	101	8	17956	negative regulation of developmental growth	ADRB1|ADRB2
31667	0.00086059	0.0042217	3	462	8	17956	response to nutrient levels	ADRB1|ADRB2|OPRM1
61884	0.00089089	0.0042217	1	2	8	17956	regulation of mini excitatory postsynaptic potential	ADRB2
61885	0.00089089	0.0042217	1	2	8	17956	positive regulation of mini excitatory postsynaptic potential	ADRB2
31635	0.00089089	0.0042217	1	2	8	17956	adenylate cyclase-inhibiting opioid receptor signaling pathway	OPRM1
1997	0.00089089	0.0042217	1	2	8	17956	positive regulation of the force of heart contraction by epinephrine-norepinephrine	ADRB1
2032	0.00089089	0.0042217	1	2	8	17956	desensitization of G protein-coupled receptor signaling pathway by arrestin	ADRB2
45444	0.0009094	0.0042394	2	104	8	17956	fat cell differentiation	ADRB1|ADRB2
9628	0.00092308	0.0042394	4	1141	8	17956	response to abiotic stimulus	OPRD1|ADRB1|ADRB2|OPRM1
43279	0.00092685	0.0042394	2	105	8	17956	response to alkaloid	HTR3A|OPRM1
32414	0.00092685	0.0042394	2	105	8	17956	positive regulation of ion transmembrane transporter activity	HTR3A|ADRB2
10562	0.00094786	0.0042613	4	1149	8	17956	positive regulation of phosphorus metabolic process	OPRD1|ADRB2|OPRM1|ADRA2C
45937	0.00094786	0.0042613	4	1149	8	17956	positive regulation of phosphate metabolic process	OPRD1|ADRB2|OPRM1|ADRA2C
7218	0.00096224	0.0042893	2	107	8	17956	neuropeptide signaling pathway	OPRD1|OPRM1
34765	0.00098517	0.0043546	3	484	8	17956	regulation of ion transmembrane transport	HTR3A|ADRB2|OPRM1
3013	0.0010271	0.0045021	3	491	8	17956	circulatory system process	ADRB1|ADRB2|ADRA2C
9991	0.0010454	0.0045445	3	494	8	17956	response to extracellular stimulus	ADRB1|ADRB2|OPRM1
32411	0.0010723	0.0046231	2	113	8	17956	positive regulation of transporter activity	HTR3A|ADRB2
70848	0.0011795	0.0050441	3	515	8	17956	response to growth factor	OPRD1|HTR3A|OPRM1
43410	0.001213	0.0051137	3	520	8	17956	positive regulation of MAPK cascade	ADRB2|OPRM1|ADRA2C
31401	0.0012152	0.0051137	4	1227	8	17956	positive regulation of protein modification process	OPRD1|ADRB2|OPRM1|ADRA2C
90066	0.0012334	0.0051488	3	523	8	17956	regulation of anatomical structure size	ADRB1|ADRB2|ADRA2C
3099	0.0013361	0.0054905	1	3	8	17956	positive regulation of the force of heart contraction by chemical signal	ADRB1
7207	0.0013361	0.0054905	1	3	8	17956	phospholipase C-activating G protein-coupled acetylcholine receptor signaling pathway	CHRM2
45471	0.0014589	0.0059486	2	132	8	17956	response to ethanol	HTR3A|OPRM1
30534	0.0015029	0.006081	2	134	8	17956	adult behavior	OPRD1|OPRM1
34762	0.0015656	0.0062862	3	568	8	17956	regulation of transmembrane transport	HTR3A|ADRB2|OPRM1
8277	0.001709	0.0066918	2	143	8	17956	regulation of G protein-coupled receptor signaling pathway	ADRB2|OPRM1
120161	0.0017326	0.0066918	2	144	8	17956	regulation of cold-induced thermogenesis	ADRB1|ADRB2
32811	0.0017811	0.0066918	1	4	8	17956	negative regulation of epinephrine secretion	ADRA2C
1990911	0.0017811	0.0066918	1	4	8	17956	response to psychosocial stress	ADRB2
32097	0.0017811	0.0066918	1	4	8	17956	positive regulation of response to food	OPRM1
32100	0.0017811	0.0066918	1	4	8	17956	positive regulation of appetite	OPRM1
32106	0.0017811	0.0066918	1	4	8	17956	positive regulation of response to extracellular stimulus	OPRM1
32109	0.0017811	0.0066918	1	4	8	17956	positive regulation of response to nutrient levels	OPRM1
61356	0.0017811	0.0066918	1	4	8	17956	regulation of Wnt protein secretion	OPRM1
51240	0.0020004	0.0074215	4	1401	8	17956	positive regulation of multicellular organismal process	ADRB1|ADRB2|OPRM1|ADRA2C
1903531	0.0020035	0.0074215	2	155	8	17956	negative regulation of secretion by cell	OPRM1|ADRA2C
34767	0.0021067	0.0077492	2	159	8	17956	positive regulation of ion transmembrane transport	HTR3A|ADRB2
65008	0.0021338	0.0077944	6	3966	8	17956	regulation of biological quality	OPRD1|ADRB1|HTR3A|ADRB2|OPRM1|ADRA2C
71315	0.0022259	0.007858	1	5	8	17956	cellular response to morphine	OPRM1
71317	0.0022259	0.007858	1	5	8	17956	cellular response to isoquinoline alkaloid	OPRM1
35624	0.0022259	0.007858	1	5	8	17956	receptor transactivation	ADRA2C
1904504	0.0022259	0.007858	1	5	8	17956	positive regulation of lipophagy	ADRB2
1904502	0.0022259	0.007858	1	5	8	17956	regulation of lipophagy	ADRB2
1932	0.0022628	0.0078942	4	1448	8	17956	regulation of protein phosphorylation	OPRD1|ADRB2|OPRM1|ADRA2C
9266	0.0022662	0.0078942	2	165	8	17956	response to temperature stimulus	ADRB1|ADRB2
50896	0.002356	0.0081531	8	8430	8	17956	response to stimulus	OPRD1|CHRM2|CHRM4|ADRB1|HTR3A|ADRB2|OPRM1|ADRA2C
2001257	0.0026019	0.0088871	2	177	8	17956	regulation of cation channel activity	ADRB2|OPRM1
51048	0.0026019	0.0088871	2	177	8	17956	negative regulation of secretion	OPRM1|ADRA2C
2000481	0.0026706	0.0088907	1	6	8	17956	positive regulation of cAMP-dependent protein kinase activity	ADRB2
14060	0.0026706	0.0088907	1	6	8	17956	regulation of epinephrine secretion	ADRA2C
1996	0.0026706	0.0088907	1	6	8	17956	positive regulation of heart rate by epinephrine-norepinephrine	ADRB1
3057	0.0026706	0.0088907	1	6	8	17956	regulation of the force of heart contraction by chemical signal	ADRB1
43408	0.0028173	0.00932	3	697	8	17956	regulation of MAPK cascade	ADRB2|OPRM1|ADRA2C
8217	0.0029291	0.0095698	2	188	8	17956	regulation of blood pressure	ADRB1|ADRB2
7626	0.0029291	0.0095698	2	188	8	17956	locomotory behavior	OPRD1|OPRM1
32879	0.0030484	0.009898	5	2734	8	17956	regulation of localization	OPRD1|HTR3A|ADRB2|OPRM1|ADRA2C
3321	0.0031151	0.0099911	1	7	8	17956	positive regulation of blood pressure by epinephrine-norepinephrine	ADRB1
1901098	0.0031151	0.0099911	1	7	8	17956	positive regulation of autophagosome maturation	ADRB2

## Sheet: Module1-CC
Cellular Component
GO-ID	p-value	corr p-value	x	n	X	N	Description	Genes in test set
45211	1.4432e-10	1.6885e-08	6	251	8	18839	postsynaptic membrane	OPRD1|CHRM2|CHRM4|HTR3A|OPRM1|ADRA2C
99699	3.4198e-10	1.8241e-08	5	110	8	18839	integral component of synaptic membrane	OPRD1|CHRM2|HTR3A|OPRM1|ADRA2C
99240	4.6772e-10	1.8241e-08	5	117	8	18839	intrinsic component of synaptic membrane	OPRD1|CHRM2|HTR3A|OPRM1|ADRA2C
97060	1.225e-09	3.5831e-08	6	358	8	18839	synaptic membrane	OPRD1|CHRM2|CHRM4|HTR3A|OPRM1|ADRA2C
5887	3.1532e-09	7.3784e-08	8	1634	8	18839	integral component of plasma membrane	OPRD1|CHRM2|CHRM4|ADRB1|HTR3A|ADRB2|OPRM1|ADRA2C
31226	4.5611e-09	8.8941e-08	8	1711	8	18839	intrinsic component of plasma membrane	OPRD1|CHRM2|CHRM4|ADRB1|HTR3A|ADRB2|OPRM1|ADRA2C
99055	1.3568e-08	2.2678e-07	4	72	8	18839	integral component of postsynaptic membrane	OPRD1|CHRM2|OPRM1|ADRA2C
98936	1.6909e-08	2.4729e-07	4	76	8	18839	intrinsic component of postsynaptic membrane	OPRD1|CHRM2|OPRM1|ADRA2C
98794	2.5685e-08	3.3391e-07	6	595	8	18839	postsynapse	OPRD1|CHRM2|CHRM4|HTR3A|OPRM1|ADRA2C
98590	3.0721e-08	3.5944e-07	7	1195	8	18839	plasma membrane region	OPRD1|CHRM2|CHRM4|HTR3A|ADRB2|OPRM1|ADRA2C
45202	5.2585e-08	5.5931e-07	7	1291	8	18839	synapse	OPRD1|CHRM2|CHRM4|ADRB1|HTR3A|OPRM1|ADRA2C
36477	2.2549e-07	2.1985e-06	6	857	8	18839	somatodendritic compartment	OPRD1|CHRM2|CHRM4|HTR3A|OPRM1|ADRA2C
98793	6.1853e-07	5.5667e-06	5	491	8	18839	presynapse	OPRD1|CHRM2|HTR3A|OPRM1|ADRA2C
99056	1.1e-06	9.1927e-06	3	52	8	18839	integral component of presynaptic membrane	CHRM2|HTR3A|OPRM1
30054	1.2279e-06	9.5429e-06	7	2034	8	18839	cell junction	OPRD1|CHRM2|CHRM4|ADRB1|HTR3A|OPRM1|ADRA2C
98889	1.305e-06	9.5429e-06	3	55	8	18839	intrinsic component of presynaptic membrane	CHRM2|HTR3A|OPRM1
30424	2.0067e-06	1.3811e-05	5	623	8	18839	axon	OPRD1|CHRM2|HTR3A|OPRM1|ADRA2C
43005	3.4545e-06	2.2454e-05	6	1360	8	18839	neuron projection	OPRD1|CHRM2|CHRM4|HTR3A|OPRM1|ADRA2C
43679	1.4138e-05	8.7058e-05	3	121	8	18839	axon terminus	OPRD1|CHRM2|ADRA2C
42734	1.9198e-05	0.00011231	3	134	8	18839	presynaptic membrane	CHRM2|HTR3A|OPRM1
44306	2.1889e-05	0.00012196	3	140	8	18839	neuron projection terminus	OPRD1|CHRM2|ADRA2C
43025	3.2786e-05	0.00017436	4	505	8	18839	neuronal cell body	CHRM2|HTR3A|OPRM1|ADRA2C
16021	4.7182e-05	0.00024001	8	5426	8	18839	integral component of membrane	OPRD1|CHRM2|CHRM4|ADRB1|HTR3A|ADRB2|OPRM1|ADRA2C
44297	5.4519e-05	0.00026578	4	575	8	18839	cell body	CHRM2|HTR3A|OPRM1|ADRA2C
120025	5.8883e-05	0.00026986	6	2211	8	18839	plasma membrane bounded cell projection	OPRD1|CHRM2|CHRM4|HTR3A|OPRM1|ADRA2C
31224	5.9968e-05	0.00026986	8	5591	8	18839	intrinsic component of membrane	OPRD1|CHRM2|CHRM4|ADRB1|HTR3A|ADRB2|OPRM1|ADRA2C
42995	7.6222e-05	0.00031909	6	2312	8	18839	cell projection	OPRD1|CHRM2|CHRM4|HTR3A|OPRM1|ADRA2C
5886	7.8036e-05	0.00031909	8	5778	8	18839	plasma membrane	OPRD1|CHRM2|CHRM4|ADRB1|HTR3A|ADRB2|OPRM1|ADRA2C
30425	8.0824e-05	0.00031909	4	636	8	18839	dendrite	OPRD1|CHRM2|CHRM4|OPRM1
97447	8.1819e-05	0.00031909	4	638	8	18839	dendritic tree	OPRD1|CHRM2|CHRM4|OPRM1
71944	9.0506e-05	0.00034159	8	5886	8	18839	cell periphery	OPRD1|CHRM2|CHRM4|ADRB1|HTR3A|ADRB2|OPRM1|ADRA2C
31410	9.8468e-05	0.0003533	6	2417	8	18839	cytoplasmic vesicle	OPRD1|CHRM2|ADRB1|ADRB2|OPRM1|ADRA2C
97708	9.9647e-05	0.0003533	6	2422	8	18839	intracellular vesicle	OPRD1|CHRM2|ADRB1|ADRB2|OPRM1|ADRA2C
32590	0.00013471	0.00046357	2	42	8	18839	dendrite membrane	OPRD1|OPRM1
150034	0.00019092	0.00063822	3	290	8	18839	distal axon	OPRD1|CHRM2|ADRA2C
32589	0.00026674	0.0008669	2	59	8	18839	neuron projection membrane	OPRD1|OPRM1
5768	0.00042207	0.0013346	4	975	8	18839	endosome	ADRB1|ADRB2|OPRM1|ADRA2C
1904602	0.00084914	0.0026145	1	2	8	18839	serotonin-activated cation-selective channel complex	HTR3A
30665	0.0010098	0.0030294	2	115	8	18839	clathrin-coated vesicle membrane	CHRM2|ADRB2
31982	0.0015081	0.0044112	6	3909	8	18839	vesicle	OPRD1|CHRM2|ADRB1|ADRB2|OPRM1|ADRA2C
31256	0.0021118	0.0060264	2	167	8	18839	leading edge membrane	OPRD1|OPRM1
30662	0.0023418	0.0065236	2	176	8	18839	coated vesicle membrane	CHRM2|ADRB2
30136	0.0026941	0.0073305	2	189	8	18839	clathrin-coated vesicle	CHRM2|ADRB2
30659	0.0033495	0.0089067	3	777	8	18839	cytoplasmic vesicle membrane	OPRD1|CHRM2|ADRB2
12506	0.0036392	0.0094619	3	800	8	18839	vesicle membrane	OPRD1|CHRM2|ADRB2

## Sheet: Module1-MF
Molecular Function
GO-ID	p-value	corr p-value	x	n	X	N	Description	Genes in test set
8227	8.6945e-12	8.6945e-10	5	52	8	18200	G protein-coupled amine receptor activity	CHRM2|CHRM4|ADRB1|ADRB2|ADRA2C
4888	6.8073e-10	3.4036e-08	8	1304	8	18200	transmembrane signaling receptor activity	OPRD1|CHRM2|CHRM4|ADRB1|HTR3A|ADRB2|OPRM1|ADRA2C
38023	2.1723e-09	5.4308e-08	8	1507	8	18200	signaling receptor activity	OPRD1|CHRM2|CHRM4|ADRB1|HTR3A|ADRB2|OPRM1|ADRA2C
60089	2.1723e-09	5.4308e-08	8	1507	8	18200	molecular transducer activity	OPRD1|CHRM2|CHRM4|ADRB1|HTR3A|ADRB2|OPRM1|ADRA2C
4930	4.7025e-09	9.4051e-08	7	882	8	18200	G protein-coupled receptor activity	OPRD1|CHRM2|CHRM4|ADRB1|ADRB2|OPRM1|ADRA2C
4935	6.6796e-09	9.5423e-08	3	10	8	18200	adrenergic receptor activity	ADRB1|ADRB2|ADRA2C
99528	6.6796e-09	9.5423e-08	3	10	8	18200	G protein-coupled neurotransmitter receptor activity	CHRM2|CHRM4|ADRB1
30594	9.0019e-08	1.1252e-06	4	111	8	18200	neurotransmitter receptor activity	CHRM2|CHRM4|ADRB1|HTR3A
4939	1.014e-06	1.1266e-05	2	4	8	18200	beta-adrenergic receptor activity	ADRB1|ADRB2
31694	1.6896e-06	1.6896e-05	2	5	8	18200	alpha-2A adrenergic receptor binding	ADRB1|ADRA2C
98960	2.0827e-06	1.8934e-05	3	62	8	18200	postsynaptic neurotransmitter receptor activity	CHRM2|CHRM4|ADRB1
16907	3.5466e-06	2.9555e-05	2	7	8	18200	G protein-coupled acetylcholine receptor activity	CHRM2|CHRM4
4985	6.0772e-06	4.6748e-05	2	9	8	18200	opioid receptor activity	OPRD1|OPRM1
1901338	1.7702e-05	0.00012644	2	15	8	18200	catecholamine binding	ADRB2|ADRA2C
15464	2.5777e-05	0.00017185	2	18	8	18200	acetylcholine receptor activity	CHRM2|CHRM4
31690	3.1997e-05	0.00019998	2	20	8	18200	adrenergic receptor binding	ADRB1|ADRA2C
42923	5.4659e-05	0.00032152	2	26	8	18200	neuropeptide binding	OPRD1|OPRM1
99589	9.4184e-05	0.0004957	2	34	8	18200	serotonin receptor activity	CHRM2|CHRM4
4993	9.4184e-05	0.0004957	2	34	8	18200	G protein-coupled serotonin receptor activity	CHRM2|CHRM4
42277	0.00025237	0.0012618	3	308	8	18200	peptide binding	OPRD1|ADRB2|OPRM1
4940	0.00043956	0.0017582	1	1	8	18200	beta1-adrenergic receptor activity	ADRB1
4941	0.00043956	0.0017582	1	1	8	18200	beta2-adrenergic receptor activity	ADRB2
4979	0.00043956	0.0017582	1	1	8	18200	beta-endorphin receptor activity	OPRM1
38046	0.00043956	0.0017582	1	1	8	18200	enkephalin receptor activity	OPRD1
38047	0.00043956	0.0017582	1	1	8	18200	morphine receptor activity	OPRM1
33218	0.00048233	0.0018551	3	384	8	18200	amide binding	OPRD1|ADRB2|OPRM1
99579	0.00087895	0.0032554	1	2	8	18200	G protein-coupled neurotransmitter receptor activity involved in regulation of postsynaptic membrane potential	ADRB1
4938	0.0013182	0.0047078	1	3	8	18200	alpha2-adrenergic receptor activity	ADRA2C
51380	0.0017572	0.0058221	1	4	8	18200	norepinephrine binding	ADRB2
99530	0.0017572	0.0058221	1	4	8	18200	G protein-coupled receptor activity involved in regulation of postsynaptic membrane potential	ADRB1
8528	0.0018048	0.0058221	2	149	8	18200	G protein-coupled peptide receptor activity	OPRD1|OPRM1
1653	0.0019017	0.0059428	2	153	8	18200	peptide receptor activity	OPRD1|OPRM1
22850	0.0021961	0.0066549	1	5	8	18200	serotonin-gated cation-selective channel activity	HTR3A
4936	0.0026348	0.0075281	1	6	8	18200	alpha-adrenergic receptor activity	ADRA2C
4977	0.0026348	0.0075281	1	6	8	18200	melanocortin receptor activity	OPRM1
51379	0.0030734	0.0085372	1	7	8	18200	epinephrine binding	ADRA2C
