# Supplementary material for: Network Pharmacology and Molecular Docking Combined to Analyze the Molecular and Pharmacological Mechanism of Pinellia ternata in the Treatment of Hypertension
Source: Curr Issues Mol Biol. 2021 May 1;43(1):6. doi: 10.3390/cimb43010006 (PMC8929114; doi:10.3390/cimb43010006)
Supplement: Supplementary file 1 [file cimb-43-00006-s001.zip › Supplementary Table 9.xls]

## Sheet: output_identify_20201118204128
KEGG pathway
#Term	Database	ID	Input number	Background number	P-Value	Corrected P-Value	Input	Hyperlink
Neuroactive ligand-receptor interaction	KEGG PATHWAY	hsa04080	7	338	3.02786e-14	5.45014e-13	CHRM4|OPRM1|CHRM2|ADRB1|ADRB2|OPRD1|ADRA2C	http://www.genome.jp/kegg-bin/show_pathway?hsa04080/hsa:4988%09red/hsa:4985%09red/hsa:154%09red/hsa:153%09red/hsa:152%09red/hsa:1129%09red/hsa:1132%09red
cGMP-PKG signaling pathway	KEGG PATHWAY	hsa04022	4	167	2.40124e-08	2.16112e-07	ADRB1|ADRB2|OPRD1|ADRA2C	http://www.genome.jp/kegg-bin/show_pathway?hsa04022/hsa:4985%09red/hsa:154%09red/hsa:153%09red/hsa:152%09red
Calcium signaling pathway	KEGG PATHWAY	hsa04020	3	193	6.74076e-06	4.04445e-05	ADRB1|ADRB2|CHRM2	http://www.genome.jp/kegg-bin/show_pathway?hsa04020/hsa:154%09red/hsa:1129%09red/hsa:153%09red
cAMP signaling pathway	KEGG PATHWAY	hsa04024	3	214	9.14312e-06	4.1144e-05	ADRB1|ADRB2|CHRM2	http://www.genome.jp/kegg-bin/show_pathway?hsa04024/hsa:154%09red/hsa:1129%09red/hsa:153%09red
Regulation of lipolysis in adipocytes	KEGG PATHWAY	hsa04923	2	55	5.76864e-05	0.000207671	ADRB1|ADRB2	http://www.genome.jp/kegg-bin/show_pathway?hsa04923/hsa:154%09red/hsa:153%09red
Renin secretion	KEGG PATHWAY	hsa04924	2	69	8.96907e-05	0.000269072	ADRB1|ADRB2	http://www.genome.jp/kegg-bin/show_pathway?hsa04924/hsa:154%09red/hsa:153%09red
Salivary secretion	KEGG PATHWAY	hsa04970	2	90	0.000150761	0.000387672	ADRB1|ADRB2	http://www.genome.jp/kegg-bin/show_pathway?hsa04970/hsa:154%09red/hsa:153%09red
Cholinergic synapse	KEGG PATHWAY	hsa04725	2	112	0.000231457	0.000520778	CHRM4|CHRM2	http://www.genome.jp/kegg-bin/show_pathway?hsa04725/hsa:1129%09red/hsa:1132%09red
Adrenergic signaling in cardiomyocytes	KEGG PATHWAY	hsa04261	2	149	0.00040543	0.00081086	ADRB1|ADRB2	http://www.genome.jp/kegg-bin/show_pathway?hsa04261/hsa:154%09red/hsa:153%09red
Regulation of actin cytoskeleton	KEGG PATHWAY	hsa04810	2	214	0.000825771	0.00148639	CHRM4|CHRM2	http://www.genome.jp/kegg-bin/show_pathway?hsa04810/hsa:1129%09red/hsa:1132%09red
Taste transduction	KEGG PATHWAY	hsa04742	1	83	0.016994	0.0252016	HTR3A	http://www.genome.jp/kegg-bin/show_pathway?hsa04742/hsa:3359%09red
Gap junction	KEGG PATHWAY	hsa04540	1	88	0.0179975	0.0252016	ADRB1	http://www.genome.jp/kegg-bin/show_pathway?hsa04540/hsa:153%09red
Morphine addiction	KEGG PATHWAY	hsa05032	1	91	0.0185992	0.0252016	OPRM1	http://www.genome.jp/kegg-bin/show_pathway?hsa05032/hsa:4988%09red
Dilated cardiomyopathy (DCM)	KEGG PATHWAY	hsa05414	1	96	0.0196013	0.0252016	ADRB1	http://www.genome.jp/kegg-bin/show_pathway?hsa05414/hsa:153%09red
Serotonergic synapse	KEGG PATHWAY	hsa04726	1	115	0.0234011	0.0272243	HTR3A	http://www.genome.jp/kegg-bin/show_pathway?hsa04726/hsa:3359%09red
Sphingolipid signaling pathway	KEGG PATHWAY	hsa04071	1	119	0.0241994	0.0272243	OPRD1	http://www.genome.jp/kegg-bin/show_pathway?hsa04071/hsa:4985%09red
Estrogen signaling pathway	KEGG PATHWAY	hsa04915	1	138	0.0279836	0.0296297	OPRM1	http://www.genome.jp/kegg-bin/show_pathway?hsa04915/hsa:4988%09red
PI3K-Akt signaling pathway	KEGG PATHWAY	hsa04151	1	354	0.0701097	0.0701097	CHRM2	http://www.genome.jp/kegg-bin/show_pathway?hsa04151/hsa:1129%09red
