# Supplementary material for: Network Pharmacology and Molecular Docking Combined to Analyze the Molecular and Pharmacological Mechanism of Pinellia ternata in the Treatment of Hypertension
Source: Curr Issues Mol Biol. 2021 May 1;43(1):6. doi: 10.3390/cimb43010006 (PMC8929114; doi:10.3390/cimb43010006)
Supplement: Supplementary file 1 [file cimb-43-00006-s001.zip › Supplementary Table 10.xls]

## Sheet: GO
ID	Description	GeneRatio	BgRatio	pvalue	p.adjust	qvalue	geneID	Count
GO:0008227	G protein-coupled amine receptor activity	10/87	27/16969	5.78234e-17	2.18572e-14	1.29646e-14	ADRB2/ADRB1/HTR2A/ADRA1A/ADRA2A/ADRA2C/ADRA1D/CHRM3/HTR2C/CHRM2	10
GO:0030594	neurotransmitter receptor activity	13/87	86/16969	4.28096e-16	8.09101e-14	4.79918e-14	ADRB1/HTR2A/DRD1/OPRM1/HTR3A/CHRM3/GABRA1/HTR2C/GABRA2/CHRNA7/CHRNA2/CHRM2/CHRM1	13
GO:0070405	ammonium ion binding	8/87	48/16969	1.09729e-10	1.38258e-08	8.20077e-09	HTR2A/SLC6A4/DRD1/HTR3A/CHRM3/HTR2C/CHRNA7/CHRNA2	8
GO:0046982	protein heterodimerization activity	17/87	497/16969	4.88109e-10	4.61263e-08	2.73598e-08	PPARG/TP53/FOS/VEGFA/TGFB1/HIF1A/ADRB1/JUN/ADRA1A/ADRA2A/ADRA2C/ADRA1B/BCL2/BAX/RELA/RXRA/AHR	17
GO:0099528	G protein-coupled neurotransmitter receptor activity	6/87	22/16969	1.06507e-09	8.05191e-08	4.77599e-08	ADRB1/HTR2A/OPRM1/CHRM3/HTR2C/CHRM2	6
GO:0004879	nuclear receptor activity	7/87	46/16969	3.31563e-09	1.79044e-07	1.062e-07	PPARG/ESR1/AR/PGR/RXRA/RXRB/AHR	7
GO:0098531	transcription factor activity, direct ligand regulated sequence-specific DNA binding	7/87	46/16969	3.31563e-09	1.79044e-07	1.062e-07	PPARG/ESR1/AR/PGR/RXRA/RXRB/AHR	7
GO:0003707	steroid hormone receptor activity	7/87	54/16969	1.06139e-08	5.01505e-07	2.97467e-07	NR3C2/PPARG/ESR1/AR/PGR/RXRA/RXRB	7
GO:0042165	neurotransmitter binding	6/87	35/16969	2.19678e-08	9.22647e-07	5.47268e-07	HTR2A/HTR3A/CHRM3/HTR2C/CHRNA7/CHRNA2	6
GO:0044389	ubiquitin-like protein ligase binding	11/87	286/16969	2.31545e-07	8.7524e-06	5.19148e-06	TP53/HIF1A/JUN/PRKACA/CASP8/SCN5A/KCNH2/BCL2/RELA/CCNB1/HSP90AB1	11
GO:0015464	acetylcholine receptor activity	4/87	12/16969	3.09193e-07	9.73959e-06	5.77703e-06	CHRM3/CHRNA7/CHRNA2/CHRM2	4
GO:1901338	catecholamine binding	4/87	12/16969	3.09193e-07	9.73959e-06	5.77703e-06	ADRB2/DRD1/ADRA2A/ADRA2C	4
GO:0051721	protein phosphatase 2A binding	5/87	29/16969	3.39924e-07	9.88395e-06	5.86266e-06	TP53/PTPN1/AKT1/SLC6A3/BCL2	5
GO:0031625	ubiquitin protein ligase binding	10/87	270/16969	1.1996e-06	3.23893e-05	1.92117e-05	TP53/HIF1A/JUN/PRKACA/CASP8/SCN5A/KCNH2/BCL2/RELA/HSP90AB1	10
GO:0047485	protein N-terminus binding	7/87	109/16969	1.42285e-06	3.58558e-05	2.12678e-05	TP53/TGFB1/SLC6A3/RELA/TDRD7/NCOA1/CALM1	7
GO:0001085	RNA polymerase II transcription factor binding	7/87	113/16969	1.81398e-06	4.15129e-05	2.46233e-05	TP53/FOS/JUN/ESR1/AR/NFATC1/AHR	7
GO:0001091	RNA polymerase II basal transcription factor binding	4/87	18/16969	1.86698e-06	4.15129e-05	2.46233e-05	TP53/ESR1/AR/AHR	4
GO:0003682	chromatin binding	12/87	437/16969	2.26288e-06	4.75204e-05	2.81867e-05	PPARG/TP53/FOS/MPO/JUN/ESR1/AR/RELA/RXRA/FOSL2/NCOA1/NCOA2	12
GO:0015267	channel activity	11/87	370/16969	2.90382e-06	5.63251e-05	3.34092e-05	NOX5/SCN5A/OPRM1/KCNH2/HTR3A/BCL2/BAX/GABRA1/GABRA2/CHRNA7/CHRNA2	11
GO:0022803	passive transmembrane transporter activity	11/87	371/16969	2.98016e-06	5.63251e-05	3.34092e-05	NOX5/SCN5A/OPRM1/KCNH2/HTR3A/BCL2/BAX/GABRA1/GABRA2/CHRNA7/CHRNA2	11
GO:0001223	transcription coactivator binding	4/87	21/16969	3.60896e-06	6.49613e-05	3.85318e-05	ESR1/RELA/NFATC1/AHR	4
GO:0001228	DNA-binding transcription activator activity, RNA polymerase II-specific	11/87	390/16969	4.80609e-06	8.25773e-05	4.89807e-05	TP53/FOS/HIF1A/JUN/ESR1/AR/PGR/RELA/NFATC1/RXRB/FOSL2	11
GO:0022824	transmitter-gated ion channel activity	5/87	54/16969	8.1855e-06	0.000128922	7.64698e-05	HTR3A/GABRA1/GABRA2/CHRNA7/CHRNA2	5
GO:0022835	transmitter-gated channel activity	5/87	54/16969	8.1855e-06	0.000128922	7.64698e-05	HTR3A/GABRA1/GABRA2/CHRNA7/CHRNA2	5
GO:0000978	RNA polymerase II proximal promoter sequence-specific DNA binding	11/87	432/16969	1.26104e-05	0.00019067	0.000113096	PPARG/TP53/HIF1A/JUN/ESR1/AR/PGR/RELA/RXRA/AHR/NCOA2	11
GO:0005230	extracellular ligand-gated ion channel activity	5/87	62/16969	1.62185e-05	0.000235793	0.00013986	HTR3A/GABRA1/GABRA2/CHRNA7/CHRNA2	5
GO:0000987	proximal promoter sequence-specific DNA binding	11/87	452/16969	1.92016e-05	0.000268823	0.000159452	PPARG/TP53/HIF1A/JUN/ESR1/AR/PGR/RELA/RXRA/AHR/NCOA2	11
GO:0099529	neurotransmitter receptor activity involved in regulation of postsynaptic membrane potential	4/87	33/16969	2.35434e-05	0.000317836	0.000188524	ADRB1/CHRNA7/CHRNA2/CHRM1	4
GO:0015276	ligand-gated ion channel activity	6/87	114/16969	2.61264e-05	0.000324086	0.000192231	KCNH2/HTR3A/GABRA1/GABRA2/CHRNA7/CHRNA2	6
GO:0022834	ligand-gated channel activity	6/87	114/16969	2.61264e-05	0.000324086	0.000192231	KCNH2/HTR3A/GABRA1/GABRA2/CHRNA7/CHRNA2	6
GO:0098960	postsynaptic neurotransmitter receptor activity	4/87	34/16969	2.65785e-05	0.000324086	0.000192231	ADRB1/CHRNA7/CHRNA2/CHRM1	4
GO:0015296	anion:cation symporter activity	3/87	12/16969	2.76973e-05	0.000327175	0.000194064	SLC6A4/SLC6A2/SLC6A3	3
GO:0015108	chloride transmembrane transporter activity	5/87	75/16969	4.1056e-05	0.000463028	0.000274645	SLC6A4/SLC6A2/SLC6A3/GABRA1/GABRA2	5
GO:0001221	transcription cofactor binding	4/87	38/16969	4.1648e-05	0.000463028	0.000274645	ESR1/RELA/NFATC1/AHR	4
GO:0005216	ion channel activity	9/87	329/16969	4.71778e-05	0.00050952	0.000302222	NOX5/SCN5A/OPRM1/KCNH2/HTR3A/GABRA1/GABRA2/CHRNA7/CHRNA2	9
GO:0008081	phosphoric diester hydrolase activity	5/87	78/16969	4.96168e-05	0.000520977	0.000309017	PDE3A/CHRM3/PDE10A/CHRM1/CHRM5	5
GO:0022838	substrate-specific channel activity	9/87	338/16969	5.81126e-05	0.000592817	0.000351629	NOX5/SCN5A/OPRM1/KCNH2/HTR3A/GABRA1/GABRA2/CHRNA7/CHRNA2	9
GO:0019903	protein phosphatase binding	6/87	132/16969	5.95954e-05	0.000592817	0.000351629	PPARG/TP53/PTPN1/AKT1/SLC6A3/BCL2	6
GO:0005496	steroid binding	5/87	83/16969	6.68825e-05	0.000633357	0.000375676	NR3C2/ESR1/AR/PGR/APOD	5
GO:0022839	ion gated channel activity	8/87	267/16969	6.75698e-05	0.000633357	0.000375676	SCN5A/OPRM1/KCNH2/HTR3A/GABRA1/GABRA2/CHRNA7/CHRNA2	8
GO:0022836	gated channel activity	8/87	268/16969	6.93609e-05	0.000633357	0.000375676	SCN5A/OPRM1/KCNH2/HTR3A/GABRA1/GABRA2/CHRNA7/CHRNA2	8
GO:0019887	protein kinase regulator activity	6/87	136/16969	7.0373e-05	0.000633357	0.000375676	TGFB1/IGF2/CASP3/CCNB1/HSP90AB1/CALM1	6
GO:0031690	adrenergic receptor binding	3/87	17/16969	8.40357e-05	0.000738733	0.000438179	ADRB1/ADRA2A/ADRA2C	3
GO:0022890	inorganic cation transmembrane transporter activity	10/87	444/16969	8.99503e-05	0.000772754	0.000458359	SLC6A4/SLC6A2/NOX5/SCN5A/OPRM1/KCNH2/HTR3A/SLC6A3/CHRNA7/CHRNA2	10
GO:0016922	nuclear receptor binding	3/87	18/16969	0.000100469	0.000843944	0.000500585	RXRA/NCOA1/NCOA2	3
GO:0035257	nuclear hormone receptor binding	6/87	147/16969	0.000108211	0.000889209	0.000527434	PPARG/HIF1A/ESR1/RXRA/NCOA1/NCOA2	6
GO:0004435	phosphatidylinositol phospholipase C activity	3/87	19/16969	0.000118866	0.000955985	0.000567042	CHRM3/CHRM1/CHRM5	3
GO:0005328	neurotransmitter:sodium symporter activity	3/87	20/16969	0.000139325	0.00107759	0.000639174	SLC6A4/SLC6A2/SLC6A3	3
GO:0019207	kinase regulator activity	6/87	154/16969	0.000139688	0.00107759	0.000639174	TGFB1/IGF2/CASP3/CCNB1/HSP90AB1/CALM1	6
GO:0042578	phosphoric ester hydrolase activity	8/87	305/16969	0.00016962	0.00128232	0.00076061	PDE3A/PTPN1/PON1/CYCS/CHRM3/PDE10A/CHRM1/CHRM5	8
GO:0008324	cation transmembrane transporter activity	10/87	484/16969	0.000181986	0.00134884	0.000800064	SLC6A4/SLC6A2/NOX5/SCN5A/OPRM1/KCNH2/HTR3A/SLC6A3/CHRNA7/CHRNA2	10
GO:0020037	heme binding	5/87	106/16969	0.000212873	0.00154742	0.000917852	PTGS2/MPO/PTGS1/NOX5/CYCS	5
GO:0051427	hormone receptor binding	6/87	170/16969	0.000239048	0.00167452	0.00099324	PPARG/HIF1A/ESR1/RXRA/NCOA1/NCOA2	6
GO:0004629	phospholipase C activity	3/87	24/16969	0.000243722	0.00167452	0.00099324	CHRM3/CHRM1/CHRM5	3
GO:0004175	endopeptidase activity	8/87	322/16969	0.000245184	0.00167452	0.00099324	MMP9/CASP3/F7/DPP4/PLAU/CASP8/F10/CASP9	8
GO:0001098	basal transcription machinery binding	4/87	60/16969	0.000252507	0.00167452	0.00099324	TP53/ESR1/AR/AHR	4
GO:0001099	basal RNA polymerase II transcription machinery binding	4/87	60/16969	0.000252507	0.00167452	0.00099324	TP53/ESR1/AR/AHR	4
GO:0019902	phosphatase binding	6/87	177/16969	0.000297028	0.0019358	0.00114822	PPARG/TP53/PTPN1/AKT1/SLC6A3/BCL2	6
GO:0046906	tetrapyrrole binding	5/87	116/16969	0.000323679	0.00202673	0.00120216	PTGS2/MPO/PTGS1/NOX5/CYCS	5
GO:0033613	activating transcription factor binding	4/87	64/16969	0.000323924	0.00202673	0.00120216	PPARG/FOS/JUN/RELA	4
GO:0005261	cation channel activity	7/87	254/16969	0.000327066	0.00202673	0.00120216	NOX5/SCN5A/OPRM1/KCNH2/HTR3A/CHRNA7/CHRNA2	7
GO:0043539	protein serine/threonine kinase activator activity	3/87	27/16969	0.000348325	0.00210165	0.00124659	TGFB1/IGF2/CALM1	3
GO:0015103	inorganic anion transmembrane transporter activity	5/87	118/16969	0.000350274	0.00210165	0.00124659	SLC6A4/SLC6A2/SLC6A3/GABRA1/GABRA2	5
GO:0002020	protease binding	5/87	121/16969	0.000393229	0.00228678	0.0013564	TP53/CASP3/DPP4/SLC6A3/BCL2	5
GO:0035326	enhancer binding	5/87	121/16969	0.000393229	0.00228678	0.0013564	TP53/JUN/RELA/NFATC1/AHR	5
GO:0030295	protein kinase activator activity	4/87	68/16969	0.000408771	0.00234114	0.00138865	TGFB1/IGF2/CCNB1/CALM1	4
GO:0097718	disordered domain specific binding	3/87	31/16969	0.000527424	0.00297562	0.00176499	TP53/HSP90AB1/CALM1	3
GO:0019209	kinase activator activity	4/87	74/16969	0.000564219	0.0031364	0.00186035	TGFB1/IGF2/CCNB1/CALM1	4
GO:0004252	serine-type endopeptidase activity	5/87	133/16969	0.000605961	0.00331961	0.00196903	MMP9/F7/DPP4/PLAU/F10	5
GO:0042562	hormone binding	4/87	81/16969	0.000793931	0.00428723	0.00254297	AR/CHRM3/CHRNA7/CHRNA2	4
GO:1901618	organic hydroxy compound transmembrane transporter activity	3/87	36/16969	0.000822432	0.00437858	0.00259715	SLC6A4/SLC6A2/SLC6A3	3
GO:0004601	peroxidase activity	3/87	37/16969	0.000891699	0.00461729	0.00273874	PTGS2/MPO/PTGS1	3
GO:0005326	neurotransmitter transporter activity	3/87	37/16969	0.000891699	0.00461729	0.00273874	SLC6A4/SLC6A2/SLC6A3	3
GO:0051213	dioxygenase activity	4/87	85/16969	0.000951325	0.00485947	0.00288239	PTGS2/PTGS1/ALOX12/EGLN1	4
GO:0000980	RNA polymerase II distal enhancer sequence-specific DNA binding	4/87	87/16969	0.00103772	0.00523013	0.00310225	TP53/JUN/RELA/NFATC1	4
GO:0016684	oxidoreductase activity, acting on peroxide as acceptor	3/87	40/16969	0.00112135	0.00531303	0.00315142	PTGS2/MPO/PTGS1	3
GO:0004993	G protein-coupled serotonin receptor activity	2/87	10/16969	0.00113851	0.00531303	0.00315142	HTR2A/HTR2C	2
GO:0016801	hydrolase activity, acting on ether bonds	2/87	10/16969	0.00113851	0.00531303	0.00315142	ALOX12/LTA4H	2
GO:0016917	GABA receptor activity	2/87	10/16969	0.00113851	0.00531303	0.00315142	GABRA1/GABRA2	2
GO:0051400	BH domain binding	2/87	10/16969	0.00113851	0.00531303	0.00315142	BCL2/BAX	2
GO:0099589	serotonin receptor activity	2/87	10/16969	0.00113851	0.00531303	0.00315142	HTR2A/HTR2C	2
GO:0004177	aminopeptidase activity	3/87	41/16969	0.00120542	0.00548975	0.00325624	DPP4/DPEP1/LTA4H	3
GO:0030331	estrogen receptor binding	3/87	41/16969	0.00120542	0.00548975	0.00325624	PPARG/ESR1/NCOA1	3
GO:0099094	ligand-gated cation channel activity	4/87	91/16969	0.00122682	0.00552069	0.00327459	KCNH2/HTR3A/CHRNA7/CHRNA2	4
GO:0008236	serine-type peptidase activity	5/87	158/16969	0.00131334	0.00584052	0.0034643	MMP9/F7/DPP4/PLAU/F10	5
GO:0001094	TFIID-class transcription factor complex binding	2/87	11/16969	0.00138687	0.00602573	0.00357416	TP53/AHR	2
GO:0008179	adenylate cyclase binding	2/87	11/16969	0.00138687	0.00602573	0.00357416	ADRB2/CALM1	2
GO:0017171	serine hydrolase activity	5/87	163/16969	0.0015074	0.00647495	0.00384061	MMP9/F7/DPP4/PLAU/F10	5
GO:0030374	nuclear receptor transcription coactivator activity	3/87	45/16969	0.00158108	0.00671516	0.00398309	PPARG/NCOA1/NCOA2	3
GO:0046873	metal ion transmembrane transporter activity	7/87	337/16969	0.00171833	0.00721701	0.00428076	SLC6A4/SLC6A2/SCN5A/OPRM1/KCNH2/SLC6A3/CHRNA7	7
GO:0042826	histone deacetylase binding	4/87	102/16969	0.00186921	0.00776442	0.00460546	TP53/HIF1A/RELA/HSP90AB1	4
GO:0016641	oxidoreductase activity, acting on the CH-NH2 group of donors, oxygen as acceptor	2/87	13/16969	0.00195377	0.00794113	0.00471028	MAOA/MAOB	2
GO:0099095	ligand-gated anion channel activity	2/87	13/16969	0.00195377	0.00794113	0.00471028	GABRA1/GABRA2	2
GO:0070888	E-box binding	3/87	49/16969	0.00202279	0.00813421	0.0048248	PPARG/HIF1A/AHR	3
GO:0001158	enhancer sequence-specific DNA binding	4/87	107/16969	0.0022264	0.00885307	0.00525119	TP53/JUN/RELA/NFATC1	4
GO:0035173	histone kinase activity	2/87	14/16969	0.00227182	0.00885307	0.00525119	PRKCA/CDK2	2
GO:0050998	nitric-oxide synthase binding	2/87	14/16969	0.00227182	0.00885307	0.00525119	SLC6A4/SCN5A	2
GO:0031072	heat shock protein binding	4/87	108/16969	0.0023031	0.00888338	0.00526917	HIF1A/BAX/HSP90AB1/AHR	4
GO:0015077	monovalent inorganic cation transmembrane transporter activity	6/87	266/16969	0.00245329	0.00936711	0.0055561	SLC6A4/SLC6A2/NOX5/SCN5A/KCNH2/SLC6A3	6
GO:0046965	retinoid X receptor binding	2/87	15/16969	0.00261261	0.0097779	0.00579976	PPARG/NCOA1	2
GO:0097472	cyclin-dependent protein kinase activity	2/87	15/16969	0.00261261	0.0097779	0.00579976	CDK2/CCNA2	2
GO:0004197	cysteine-type endopeptidase activity	3/87	56/16969	0.00296597	0.0108163	0.0064157	CASP3/CASP8/CASP9	3
GO:0015370	solute:sodium symporter activity	3/87	56/16969	0.00296597	0.0108163	0.0064157	SLC6A4/SLC6A2/SLC6A3	3
GO:0022848	acetylcholine-gated cation-selective channel activity	2/87	16/16969	0.00297592	0.0108163	0.0064157	CHRNA7/CHRNA2	2
GO:0015081	sodium ion transmembrane transporter activity	4/87	117/16969	0.00307705	0.0110774	0.00657054	SLC6A4/SLC6A2/SCN5A/SLC6A3	4
GO:0097110	scaffold protein binding	3/87	58/16969	0.00327731	0.011687	0.00693214	CASP8/SCN5A/KCNH2	3
GO:0005123	death receptor binding	2/87	17/16969	0.00336151	0.0117653	0.00697856	CASP3/CASP8	2
GO:0016638	oxidoreductase activity, acting on the CH-NH2 group of donors	2/87	17/16969	0.00336151	0.0117653	0.00697856	MAOA/MAOB	2
GO:0003713	transcription coactivator activity	6/87	285/16969	0.00344955	0.0119627	0.00709565	PPARG/JUN/RXRA/RXRB/NCOA1/NCOA2	6
GO:0016538	cyclin-dependent protein serine/threonine kinase regulator activity	2/87	18/16969	0.00376914	0.0128354	0.00761333	CASP3/CCNB1	2
GO:0017025	TBP-class protein binding	2/87	18/16969	0.00376914	0.0128354	0.00761333	ESR1/AHR	2
GO:0016247	channel regulator activity	4/87	127/16969	0.0041268	0.0139279	0.00826135	ADRB2/BCL2/CHRNA7/CALM1	4
GO:0016209	antioxidant activity	3/87	65/16969	0.00452156	0.0151252	0.00897151	PTGS2/MPO/PTGS1	3
GO:0001965	G-protein alpha-subunit binding	2/87	20/16969	0.00464961	0.0151513	0.00898699	HTR2A/OPRM1	2
GO:0005158	insulin receptor binding	2/87	20/16969	0.00464961	0.0151513	0.00898699	PTPN1/IGF2	2
GO:0008519	ammonium transmembrane transporter activity	2/87	20/16969	0.00464961	0.0151513	0.00898699	SLC6A4/SLC6A3	2
GO:0042277	peptide binding	5/87	215/16969	0.0049678	0.0160498	0.00951993	PPARG/ADRB2/RXRA/HSP90AB1/CHRNA7	5
GO:0015294	solute:cation symporter activity	3/87	70/16969	0.0055634	0.0176889	0.0104921	SLC6A4/SLC6A2/SLC6A3	3
GO:0004112	cyclic-nucleotide phosphodiesterase activity	2/87	22/16969	0.00561551	0.0176889	0.0104921	PDE3A/PDE10A	2
GO:0004114	3',5'-cyclic-nucleotide phosphodiesterase activity	2/87	22/16969	0.00561551	0.0176889	0.0104921	PDE3A/PDE10A	2
GO:0008047	enzyme activator activity	7/87	419/16969	0.00571096	0.0178409	0.0105823	TGFB1/IGF2/CASP3/JUN/CASP9/CCNB1/CALM1	7
GO:0016702	oxidoreductase activity, acting on single donors with incorporation of molecular oxygen, incorporation of two atoms of oxygen	2/87	23/16969	0.00612993	0.0188383	0.0111739	PTGS2/ALOX12	2
GO:0070412	R-SMAD binding	2/87	23/16969	0.00612993	0.0188383	0.0111739	FOS/JUN	2
GO:0016701	oxidoreductase activity, acting on single donors with incorporation of molecular oxygen	2/87	24/16969	0.00666504	0.0201551	0.011955	PTGS2/ALOX12	2
GO:0042974	retinoic acid receptor binding	2/87	24/16969	0.00666504	0.0201551	0.011955	PPARG/NCOA1	2
GO:0046875	ephrin receptor binding	2/87	25/16969	0.00722062	0.0213988	0.0126927	PTPN1/PIK3CG	2
GO:0048037	cofactor binding	7/87	438/16969	0.00722375	0.0213988	0.0126927	PTGS2/MPO/PTGS1/NOX5/CYCS/MAOB/EGLN1	7
GO:0051117	ATPase binding	3/87	77/16969	0.00724615	0.0213988	0.0126927	ESR1/AR/PGR	3
GO:0035035	histone acetyltransferase binding	2/87	26/16969	0.00779644	0.0227854	0.0135152	TP53/HIF1A	2
GO:0008509	anion transmembrane transporter activity	5/87	240/16969	0.00783625	0.0227854	0.0135152	SLC6A4/SLC6A2/SLC6A3/GABRA1/GABRA2	5
GO:0004620	phospholipase activity	3/87	83/16969	0.00890392	0.0256922	0.0152393	CHRM3/CHRM1/CHRM5	3
GO:0005231	excitatory extracellular ligand-gated ion channel activity	2/87	29/16969	0.00964321	0.027407	0.0162565	CHRNA7/CHRNA2	2
GO:0042805	actinin binding	2/87	29/16969	0.00964321	0.027407	0.0162565	PPARG/RELA	2
GO:1904315	transmitter-gated ion channel activity involved in regulation of postsynaptic membrane potential	2/87	30/16969	0.0102979	0.0290492	0.0172305	CHRNA7/CHRNA2	2
GO:0035258	steroid hormone receptor binding	3/87	88/16969	0.0104416	0.0292365	0.0173416	PPARG/ESR1/NCOA1	3
GO:0001046	core promoter sequence-specific DNA binding	2/87	32/16969	0.0116645	0.0324204	0.0192301	TP53/FOS	2
GO:0033218	amide binding	5/87	266/16969	0.0118738	0.0327612	0.0194323	PPARG/ADRB2/RXRA/HSP90AB1/CHRNA7	5
GO:0004674	protein serine/threonine kinase activity	6/87	371/16969	0.0120098	0.0328964	0.0195125	AKT1/PRKACA/PIK3CG/PRKCA/CDK2/PIM1	6
GO:0008238	exopeptidase activity	3/87	97/16969	0.0135759	0.0366549	0.0217418	DPP4/DPEP1/LTA4H	3
GO:0009055	electron transfer activity	3/87	97/16969	0.0135759	0.0366549	0.0217418	AKR1B1/CYCS/MAOB	3
GO:0016248	channel inhibitor activity	2/87	36/16969	0.0146212	0.0391972	0.0232498	BCL2/CALM1	2
GO:0016298	lipase activity	3/87	100/16969	0.014727	0.0392029	0.0232532	CHRM3/CHRM1/CHRM5	3
GO:0001102	RNA polymerase II activating transcription factor binding	2/87	37/16969	0.0154057	0.0407228	0.0241547	FOS/JUN	2
GO:0051879	Hsp90 protein binding	2/87	38/16969	0.016208	0.042546	0.0252361	HIF1A/AHR	2
GO:0004712	protein serine/threonine/tyrosine kinase activity	2/87	40/16969	0.017865	0.0465722	0.0276243	AKT1/PRKACA	2
