# Supplementary material for: Network Pharmacology and Molecular Docking Combined to Analyze the Molecular and Pharmacological Mechanism of Pinellia ternata in the Treatment of Hypertension
Source: Curr Issues Mol Biol. 2021 May 1;43(1):6. doi: 10.3390/cimb43010006 (PMC8929114; doi:10.3390/cimb43010006)
Supplement: Supplementary file 1 [file cimb-43-00006-s001.zip › Supplementary Table 11.xls]

## Sheet: KEGG
ID	Description	GeneRatio	BgRatio	pvalue	p.adjust	qvalue	geneID	Count
hsa05161	Hepatitis B	17/82	162/8075	3.12463e-13	6.7492e-11	2.76283e-11	TP53/FOS/TGFB1/MMP9/AKT1/CASP3/JUN/CYCS/CASP8/BCL2/PRKCA/BAX/CDK2/CASP9/RELA/CCNA2/NFATC1	17
hsa04080	Neuroactive ligand-receptor interaction	22/82	341/8075	1.49173e-12	1.61106e-10	6.595e-11	ADRB2/ADRB1/HTR2A/DRD1/ADRA1A/ADRA2A/ADRA2C/ADRA1D/ADRA1B/OPRM1/CHRM3/GABRA1/HTR2C/GABRA5/GABRA2/OPRD1/CHRNA7/CHRNA2/CHRM2/CHRM1/CHRM4/CHRM5	22
hsa05167	Kaposi sarcoma-associated herpesvirus infection	16/82	193/8075	6.37631e-11	4.59094e-09	1.87933e-09	TP53/FOS/VEGFA/HIF1A/PTGS2/AKT1/CASP3/JUN/CYCS/CASP8/PIK3CG/BAX/CASP9/RELA/NFATC1/CALM1	16
hsa05222	Small cell lung cancer	12/82	92/8075	9.90571e-11	5.08515e-09	2.08164e-09	TP53/PTGS2/AKT1/CASP3/CYCS/BCL2/BAX/CDK2/CASP9/RELA/RXRA/RXRB	12
hsa04020	Calcium signaling pathway	16/82	201/8075	1.17712e-10	5.08515e-09	2.08164e-09	ADRB2/ADRB1/HTR2A/DRD1/ADRA1A/PRKACA/ADRA1D/ADRA1B/PRKCA/CHRM3/HTR2C/CHRNA7/CHRM2/CHRM1/CALM1/CHRM5	16
hsa04915	Estrogen signaling pathway	13/82	138/8075	9.79149e-10	3.51242e-08	1.43783e-08	FOS/MMP9/AKT1/JUN/ESR1/PRKACA/PGR/OPRM1/BCL2/HSP90AB1/NCOA1/CALM1/NCOA2	13
hsa04725	Cholinergic synapse	12/82	113/8075	1.13828e-09	3.51242e-08	1.43783e-08	FOS/AKT1/PRKACA/PIK3CG/BCL2/PRKCA/CHRM3/CHRNA7/CHRM2/CHRM1/CHRM4/CHRM5	12
hsa04726	Serotonergic synapse	12/82	115/8075	1.3976e-09	3.77351e-08	1.54471e-08	PTGS2/HTR2A/SLC6A4/CASP3/PRKACA/PTGS1/ALOX12/HTR3A/PRKCA/MAOA/MAOB/HTR2C	12
hsa04933	AGE-RAGE signaling pathway in diabetic complications	11/82	100/8075	4.0637e-09	9.75288e-08	3.99241e-08	VEGFA/TGFB1/AKT1/CASP3/JUN/BCL2/PRKCA/BAX/RELA/NFATC1/PIM1	11
hsa04022	cGMP-PKG signaling pathway	13/82	167/8075	1.02653e-08	2.2173e-07	9.07667e-08	PDE3A/ADRB2/ADRB1/AKT1/ADRA1A/ADRA2A/ADRA2C/ADRA1D/ADRA1B/PIK3CG/NFATC1/OPRD1/CALM1	13
hsa05162	Measles	12/82	139/8075	1.24324e-08	2.26991e-07	9.29202e-08	TP53/FOS/AKT1/CASP3/JUN/CYCS/CASP8/BCL2/BAX/CDK2/CASP9/RELA	12
hsa05210	Colorectal cancer	10/82	86/8075	1.26106e-08	2.26991e-07	9.29202e-08	TP53/FOS/TGFB1/AKT1/CASP3/JUN/CYCS/BCL2/BAX/CASP9	10
hsa05170	Human immunodeficiency virus 1 infection	14/82	212/8075	2.18904e-08	3.63718e-07	1.4889e-07	FOS/AKT1/CASP3/JUN/CYCS/CASP8/BCL2/PRKCA/BAX/CASP9/RELA/NFATC1/CCNB1/CALM1	14
hsa05031	Amphetamine addiction	9/82	69/8075	2.53772e-08	3.91533e-07	1.60277e-07	FOS/DRD1/JUN/PRKACA/SLC6A3/PRKCA/MAOA/MAOB/CALM1	9
hsa04024	cAMP signaling pathway	14/82	216/8075	2.77693e-08	3.92262e-07	1.60575e-07	PDE3A/FOS/ADRB2/ADRB1/AKT1/DRD1/JUN/PRKACA/RELA/NFATC1/PDE10A/CHRM2/CHRM1/CALM1	14
hsa04261	Adrenergic signaling in cardiomyocytes	12/82	150/8075	2.94232e-08	3.92262e-07	1.60575e-07	ADRB2/ADRB1/AKT1/ADRA1A/PRKACA/ADRA1D/ADRA1B/PIK3CG/SCN5A/BCL2/PRKCA/CALM1	12
hsa04919	Thyroid hormone signaling pathway	11/82	121/8075	3.08725e-08	3.92262e-07	1.60575e-07	TP53/HIF1A/AKT1/ESR1/PRKACA/PRKCA/CASP9/RXRA/RXRB/NCOA1/NCOA2	11
hsa05215	Prostate cancer	10/82	97/8075	4.09375e-08	4.7828e-07	1.95787e-07	TP53/MMP9/AKT1/AR/PLAU/BCL2/CDK2/CASP9/RELA/HSP90AB1	10
hsa04115	p53 signaling pathway	9/82	73/8075	4.2071e-08	4.7828e-07	1.95787e-07	TP53/CASP3/CYCS/CASP8/BCL2/BAX/CDK2/CASP9/CCNB1	9
hsa05163	Human cytomegalovirus infection	14/82	225/8075	4.65595e-08	5.02843e-07	2.05842e-07	TP53/VEGFA/PTGS2/AKT1/CASP3/PRKACA/CYCS/CASP8/PRKCA/BAX/CASP9/RELA/NFATC1/CALM1	14
hsa04210	Apoptosis	11/82	136/8075	1.0418e-07	1.03476e-06	4.23585e-07	TP53/FOS/AKT1/CASP3/JUN/CYCS/CASP8/BCL2/BAX/CASP9/RELA	11
hsa04659	Th17 cell differentiation	10/82	107/8075	1.05392e-07	1.03476e-06	4.23585e-07	FOS/TGFB1/HIF1A/JUN/RELA/RXRA/NFATC1/RXRB/HSP90AB1/AHR	10
hsa05032	Morphine addiction	9/82	91/8075	2.93076e-07	2.75237e-06	1.1267e-06	PDE3A/DRD1/PRKACA/OPRM1/PRKCA/GABRA1/GABRA5/GABRA2/PDE10A	9
hsa04970	Salivary secretion	9/82	93/8075	3.53815e-07	3.18433e-06	1.30353e-06	ADRB2/ADRB1/ADRA1A/PRKACA/ADRA1D/ADRA1B/PRKCA/CHRM3/CALM1	9
hsa05030	Cocaine addiction	7/82	49/8075	5.23168e-07	4.52017e-06	1.85036e-06	DRD1/JUN/PRKACA/SLC6A3/MAOA/MAOB/RELA	7
hsa01522	Endocrine resistance	9/82	98/8075	5.55636e-07	4.61606e-06	1.88961e-06	TP53/FOS/MMP9/AKT1/JUN/ESR1/PRKACA/BCL2/BAX	9
hsa01524	Platinum drug resistance	8/82	73/8075	6.29725e-07	5.0378e-06	2.06226e-06	TP53/AKT1/CASP3/CYCS/CASP8/BCL2/BAX/CASP9	8
hsa04215	Apoptosis - multiple species	6/82	32/8075	6.68831e-07	5.15956e-06	2.1121e-06	CASP3/CYCS/CASP8/BCL2/BAX/CASP9	6
hsa05169	Epstein-Barr virus infection	12/82	202/8075	7.72235e-07	5.75182e-06	2.35454e-06	TP53/AKT1/CASP3/JUN/CYCS/CASP8/BCL2/BAX/CDK2/CASP9/RELA/CCNA2	12
hsa05205	Proteoglycans in cancer	12/82	205/8075	9.03923e-07	6.50824e-06	2.66419e-06	TP53/VEGFA/TGFB1/IGF2/MMP9/HIF1A/AKT1/CASP3/ESR1/PRKACA/PLAU/PRKCA	12
hsa05418	Fluid shear stress and atherosclerosis	10/82	139/8075	1.22956e-06	8.56728e-06	3.50707e-06	TP53/FOS/VEGFA/MMP9/AKT1/JUN/BCL2/RELA/HSP90AB1/CALM1	10
hsa05145	Toxoplasmosis	9/82	112/8075	1.72971e-06	1.16756e-05	4.77947e-06	TGFB1/AKT1/CASP3/CYCS/CASP8/PIK3CG/BCL2/CASP9/RELA	9
hsa04932	Non-alcoholic fatty liver disease	10/82	150/8075	2.46701e-06	1.61477e-05	6.61017e-06	FOS/TGFB1/AKT1/CASP3/JUN/CYCS/CASP8/BAX/RELA/RXRA	10
hsa05160	Hepatitis C	10/82	157/8075	3.72741e-06	2.368e-05	9.69358e-06	TP53/AKT1/CASP3/CYCS/CASP8/BAX/CDK2/CASP9/RELA/RXRA	10
hsa04657	IL-17 signaling pathway	8/82	94/8075	4.39093e-06	2.70983e-05	1.10929e-05	FOS/MMP9/PTGS2/CASP3/JUN/CASP8/RELA/HSP90AB1	8
hsa04926	Relaxin signaling pathway	9/82	129/8075	5.61179e-06	3.36708e-05	1.37834e-05	FOS/VEGFA/TGFB1/MMP9/AKT1/JUN/PRKACA/PRKCA/RELA	9
hsa04728	Dopaminergic synapse	9/82	132/8075	6.77886e-06	3.95739e-05	1.61998e-05	FOS/AKT1/DRD1/PRKACA/SLC6A3/PRKCA/MAOA/MAOB/CALM1	9
hsa05223	Non-small cell lung cancer	7/82	72/8075	7.43729e-06	4.22751e-05	1.73056e-05	TP53/AKT1/PRKCA/BAX/CASP9/RXRA/RXRB	7
hsa05212	Pancreatic cancer	7/82	76/8075	1.06833e-05	5.88789e-05	2.41025e-05	TP53/VEGFA/TGFB1/AKT1/BAX/CASP9/RELA	7
hsa04151	PI3K-Akt signaling pathway	14/82	354/8075	1.09035e-05	5.88789e-05	2.41025e-05	TP53/VEGFA/IGF2/AKT1/PIK3CG/BCL2/PRKCA/CDK2/CASP9/RELA/RXRA/HSP90AB1/CHRM2/CHRM1	14
hsa05166	Human T-cell leukemia virus 1 infection	11/82	219/8075	1.17124e-05	6.17042e-05	2.5259e-05	TP53/FOS/TGFB1/AKT1/JUN/PRKACA/BAX/CDK2/RELA/CCNA2/NFATC1	11
hsa05152	Tuberculosis	10/82	180/8075	1.25832e-05	6.47138e-05	2.6491e-05	TGFB1/AKT1/CASP3/CYCS/CASP8/BCL2/BAX/CASP9/RELA/CALM1	10
hsa04668	TNF signaling pathway	8/82	112/8075	1.61861e-05	8.13067e-05	3.32834e-05	FOS/MMP9/PTGS2/AKT1/CASP3/JUN/CASP8/RELA	8
hsa04923	Regulation of lipolysis in adipocytes	6/82	57/8075	2.18817e-05	0.000106074	4.34221e-05	ADRB2/ADRB1/PTGS2/AKT1/PRKACA/PTGS1	6
hsa05202	Transcriptional misregulation in cancer	10/82	192/8075	2.20988e-05	0.000106074	4.34221e-05	PPARG/TP53/MMP9/MPO/PLAU/BAX/RELA/CCNA2/RXRA/RXRB	10
hsa04218	Cellular senescence	9/82	156/8075	2.61584e-05	0.000122831	5.02815e-05	TP53/TGFB1/AKT1/CDK2/RELA/CCNA2/NFATC1/CCNB1/CALM1	9
hsa05216	Thyroid cancer	5/82	37/8075	3.2255e-05	0.000148236	6.06812e-05	PPARG/TP53/BAX/RXRA/RXRB	5
hsa04010	MAPK signaling pathway	12/82	294/8075	3.6608e-05	0.000164736	6.74358e-05	TP53/FOS/VEGFA/TGFB1/IGF2/AKT1/CASP3/JUN/PRKACA/PRKCA/RELA/NFATC1	12
hsa05012	Parkinson disease	11/82	249/8075	3.87958e-05	0.000167598	6.86073e-05	TP53/CASP3/DRD1/PRKACA/CYCS/SLC6A3/MAOA/BAX/MAOB/CASP9/CALM1	11
hsa05132	Salmonella infection	11/82	249/8075	3.87958e-05	0.000167598	6.86073e-05	FOS/AKT1/CASP3/JUN/CYCS/CASP8/PIK3CG/BCL2/BAX/RELA/HSP90AB1	11
hsa04380	Osteoclast differentiation	8/82	128/8075	4.26936e-05	0.00018082	7.40199e-05	PPARG/FOS/TGFB1/AKT1/JUN/RELA/NFATC1/FOSL2	8
hsa04914	Progesterone-mediated oocyte maturation	7/82	100/8075	6.43314e-05	0.000267223	0.000109389	AKT1/PRKACA/PGR/CDK2/CCNA2/CCNB1/HSP90AB1	7
hsa05211	Renal cell carcinoma	6/82	69/8075	6.5611e-05	0.000267396	0.00010946	VEGFA/TGFB1/HIF1A/AKT1/JUN/EGLN1	6
hsa05022	Pathways of neurodegeneration - multiple diseases	15/82	475/8075	7.21206e-05	0.000288483	0.000118092	PTGS2/CASP3/CYCS/CASP8/SLC6A3/BCL2/PRKCA/BAX/CASP9/RELA/CHRM3/CHRNA7/CHRM1/CALM1/CHRM5	15
hsa04625	C-type lectin receptor signaling pathway	7/82	104/8075	8.26372e-05	0.000324539	0.000132852	PTGS2/AKT1/JUN/CASP8/RELA/NFATC1/CALM1	7
hsa04066	HIF-1 signaling pathway	7/82	109/8075	0.000111287	0.00042925	0.000175716	VEGFA/HIF1A/AKT1/BCL2/PRKCA/EGLN1/RELA	7
hsa05224	Breast cancer	8/82	147/8075	0.000113878	0.000431538	0.000176653	TP53/FOS/AKT1/JUN/ESR1/PGR/BAX/NCOA1	8
hsa05226	Gastric cancer	8/82	149/8075	0.000125151	0.000466079	0.000190793	TP53/TGFB1/AKT1/BCL2/BAX/CDK2/RXRA/RXRB	8
hsa04921	Oxytocin signaling pathway	8/82	154/8075	0.000157429	0.000576349	0.000235932	FOS/PTGS2/JUN/PRKACA/PIK3CG/PRKCA/NFATC1/CALM1	8
hsa04071	Sphingolipid signaling pathway	7/82	119/8075	0.000192866	0.000682936	0.000279564	TP53/AKT1/BCL2/PRKCA/BAX/RELA/OPRD1	7
hsa04722	Neurotrophin signaling pathway	7/82	119/8075	0.000192866	0.000682936	0.000279564	TP53/AKT1/JUN/BCL2/BAX/RELA/CALM1	7
hsa05203	Viral carcinogenesis	9/82	204/8075	0.000208702	0.000727091	0.00029764	TP53/CASP3/JUN/PRKACA/CASP8/BAX/CDK2/RELA/CCNA2	9
hsa04742	Taste transduction	6/82	86/8075	0.000224361	0.000769237	0.000314892	PRKACA/HTR3A/CHRM3/GABRA1/GABRA5/GABRA2	6
hsa04540	Gap junction	6/82	88/8075	0.000254479	0.000858867	0.000351583	ADRB1/HTR2A/DRD1/PRKACA/PRKCA/HTR2C	6
hsa05134	Legionellosis	5/82	57/8075	0.000264345	0.000872659	0.000357229	CASP3/CYCS/CASP8/CASP9/RELA	5
hsa04211	Longevity regulating pathway	6/82	89/8075	0.000270686	0.000872659	0.000357229	PPARG/TP53/AKT1/PRKACA/BAX/RELA	6
hsa05235	PD-L1 expression and PD-1 checkpoint pathway in cancer	6/82	89/8075	0.000270686	0.000872659	0.000357229	FOS/HIF1A/AKT1/JUN/RELA/NFATC1	6
hsa04370	VEGF signaling pathway	5/82	59/8075	0.000311098	0.000988193	0.000404523	VEGFA/PTGS2/AKT1/PRKCA/CASP9	5
hsa05010	Alzheimer disease	12/82	369/8075	0.000317121	0.000992727	0.00040638	PTGS2/AKT1/CASP3/CYCS/CASP8/CASP9/RELA/CHRM3/CHRNA7/CHRM1/CALM1/CHRM5	12
hsa05164	Influenza A	8/82	171/8075	0.00032255	0.000995298	0.000407432	AKT1/CASP3/CYCS/CASP8/PRKCA/BAX/CASP9/RELA	8
hsa04750	Inflammatory mediator regulation of TRP channels	6/82	98/8075	0.000456045	0.00138741	0.000567944	HTR2A/PRKACA/ALOX12/PRKCA/HTR2C/CALM1	6
hsa05165	Human papillomavirus infection	11/82	331/8075	0.000479547	0.00143864	0.000588918	TP53/VEGFA/PTGS2/AKT1/CASP3/PRKACA/CASP8/BAX/CDK2/RELA/CCNA2	11
hsa05221	Acute myeloid leukemia	5/82	67/8075	0.000563283	0.00164893	0.000675	AKT1/MPO/RELA/CCNA2/PIM1	5
hsa05142	Chagas disease	6/82	102/8075	0.000564911	0.00164893	0.000675	FOS/TGFB1/AKT1/JUN/CASP8/RELA	6
hsa04924	Renin secretion	5/82	69/8075	0.000645194	0.00185816	0.00076065	PDE3A/ADRB2/ADRB1/PRKACA/CALM1	5
hsa05033	Nicotine addiction	4/82	40/8075	0.000683612	0.0019429	0.000795338	GABRA1/GABRA5/GABRA2/CHRNA7	4
hsa04928	Parathyroid hormone synthesis, secretion and action	6/82	106/8075	0.000693009	0.00194403	0.0007958	FOS/PRKACA/BCL2/PRKCA/RXRA/RXRB	6
hsa05130	Pathogenic Escherichia coli infection	8/82	197/8075	0.000827363	0.00229116	0.000937901	FOS/CASP3/JUN/CYCS/CASP8/BAX/CASP9/RELA	8
hsa05214	Glioma	5/82	75/8075	0.000944927	0.0025836	0.00105761	TP53/AKT1/PRKCA/BAX/CALM1	5
hsa04971	Gastric acid secretion	5/82	76/8075	0.00100351	0.00264339	0.00108209	PRKACA/PRKCA/CA2/CHRM3/CALM1	5
hsa05133	Pertussis	5/82	76/8075	0.00100351	0.00264339	0.00108209	FOS/CASP3/JUN/RELA/CALM1	5
hsa05220	Chronic myeloid leukemia	5/82	76/8075	0.00100351	0.00264339	0.00108209	TP53/TGFB1/AKT1/BAX/RELA	5
hsa05140	Leishmaniasis	5/82	77/8075	0.00106475	0.00277091	0.00113429	FOS/TGFB1/PTGS2/JUN/RELA	5
hsa01521	EGFR tyrosine kinase inhibitor resistance	5/82	79/8075	0.0011955	0.00307415	0.00125842	VEGFA/AKT1/BCL2/PRKCA/BAX	5
hsa04662	B cell receptor signaling pathway	5/82	82/8075	0.00141346	0.00359185	0.00147035	FOS/AKT1/JUN/RELA/NFATC1	5
hsa04114	Oocyte meiosis	6/82	129/8075	0.00192096	0.00482474	0.00197504	PRKACA/AR/PGR/CDK2/CCNB1/CALM1	6
hsa04727	GABAergic synapse	5/82	89/8075	0.00203466	0.00505156	0.00206789	PRKACA/PRKCA/GABRA1/GABRA5/GABRA2	5
hsa04270	Vascular smooth muscle contraction	6/82	133/8075	0.00224243	0.00550414	0.00225316	ADRA1A/PRKACA/ADRA1D/ADRA1B/PRKCA/CALM1	6
hsa05213	Endometrial cancer	4/82	58/8075	0.0027639	0.0067079	0.00274592	TP53/AKT1/BAX/CASP9	4
hsa05231	Choline metabolism in cancer	5/82	98/8075	0.00310097	0.00742566	0.00303974	FOS/HIF1A/AKT1/JUN/PRKCA	5
hsa05416	Viral myocarditis	4/82	60/8075	0.0031284	0.00742566	0.00303974	CASP3/CYCS/CASP8/CASP9	4
hsa00590	Arachidonic acid metabolism	4/82	61/8075	0.00332241	0.00780043	0.00319316	PTGS2/PTGS1/ALOX12/LTA4H	4
hsa05146	Amoebiasis	5/82	102/8075	0.0036854	0.00855965	0.00350395	TGFB1/CASP3/PRKACA/PRKCA/RELA	5
hsa04723	Retrograde endocannabinoid signaling	6/82	148/8075	0.00382012	0.00877815	0.00359339	PTGS2/PRKACA/PRKCA/GABRA1/GABRA5/GABRA2	6
hsa04620	Toll-like receptor signaling pathway	5/82	104/8075	0.00400553	0.00895649	0.0036664	FOS/AKT1/JUN/CASP8/RELA	5
hsa04660	T cell receptor signaling pathway	5/82	104/8075	0.00400553	0.00895649	0.0036664	FOS/AKT1/JUN/RELA/NFATC1	5
hsa05206	MicroRNAs in cancer	9/82	310/8075	0.00402213	0.00895649	0.0036664	TP53/VEGFA/MMP9/PTGS2/CASP3/PLAU/BCL2/PRKCA/PIM1	9
hsa05321	Inflammatory bowel disease	4/82	65/8075	0.00418048	0.00921411	0.00377186	TGFB1/JUN/RELA/NFATC1	4
hsa04137	Mitophagy - animal	4/82	68/8075	0.00491453	0.0107226	0.00438937	TP53/HIF1A/JUN/RELA	4
hsa04920	Adipocytokine signaling pathway	4/82	69/8075	0.00517726	0.0111829	0.00457779	AKT1/RELA/RXRA/RXRB	4
hsa04917	Prolactin signaling pathway	4/82	70/8075	0.00544926	0.0116539	0.00477058	FOS/AKT1/ESR1/RELA	4
hsa00350	Tyrosine metabolism	3/82	36/8075	0.00566137	0.0119888	0.00490769	MAOA/MAOB/ADH1C	3
hsa05225	Hepatocellular carcinoma	6/82	168/8075	0.00705133	0.0147873	0.00605326	TP53/TGFB1/IGF2/AKT1/PRKCA/BAX	6
hsa05219	Bladder cancer	3/82	41/8075	0.00815106	0.0169291	0.00693005	TP53/VEGFA/MMP9	3
hsa04110	Cell cycle	5/82	124/8075	0.00838138	0.0172417	0.007058	TP53/TGFB1/CDK2/CCNA2/CCNB1	5
hsa04014	Ras signaling pathway	7/82	232/8075	0.00902313	0.0183867	0.00752674	VEGFA/IGF2/AKT1/PRKACA/PRKCA/RELA/CALM1	7
hsa05034	Alcoholism	6/82	187/8075	0.0116323	0.0234821	0.00961255	DRD1/PRKACA/SLC6A3/MAOA/MAOB/CALM1	6
hsa05131	Shigellosis	7/82	246/8075	0.0122099	0.0244197	0.00999637	TP53/AKT1/JUN/CYCS/BCL2/BAX/RELA	7
hsa00360	Phenylalanine metabolism	2/82	17/8075	0.0125503	0.0246647	0.0100967	MAOA/MAOB	2
hsa05135	Yersinia infection	5/82	137/8075	0.0125607	0.0246647	0.0100967	FOS/AKT1/JUN/RELA/NFATC1	5
hsa04658	Th1 and Th2 cell differentiation	4/82	92/8075	0.0140452	0.0273313	0.0111882	FOS/JUN/RELA/NFATC1	4
hsa04912	GnRH signaling pathway	4/82	93/8075	0.0145655	0.0278421	0.0113974	JUN/PRKACA/PRKCA/CALM1	4
hsa05323	Rheumatoid arthritis	4/82	93/8075	0.0145655	0.0278421	0.0113974	FOS/VEGFA/TGFB1/JUN	4
hsa04961	Endocrine and other factor-regulated calcium reabsorption	3/82	53/8075	0.0164232	0.0311177	0.0127382	ESR1/PRKACA/PRKCA	3
hsa04713	Circadian entrainment	4/82	97/8075	0.0167685	0.0314956	0.012893	FOS/PRKACA/PRKCA/CALM1	4
hsa00340	Histidine metabolism	2/82	22/8075	0.0206308	0.0384161	0.0157259	MAOA/MAOB	2
hsa04064	NF-kappa B signaling pathway	4/82	104/8075	0.0211047	0.0389625	0.0159496	PTGS2/PLAU/BCL2/RELA	4
hsa04310	Wnt signaling pathway	5/82	160/8075	0.0230542	0.0422009	0.0172752	TP53/JUN/PRKACA/PRKCA/NFATC1	5
